# Supplementary material for: Migration direction in a songbird explained by two loci
Source: PubMed Central journal article supplement (PMC9834303; doi:10.1038/s41467-023-35788-7), 2023-01-11

BM231

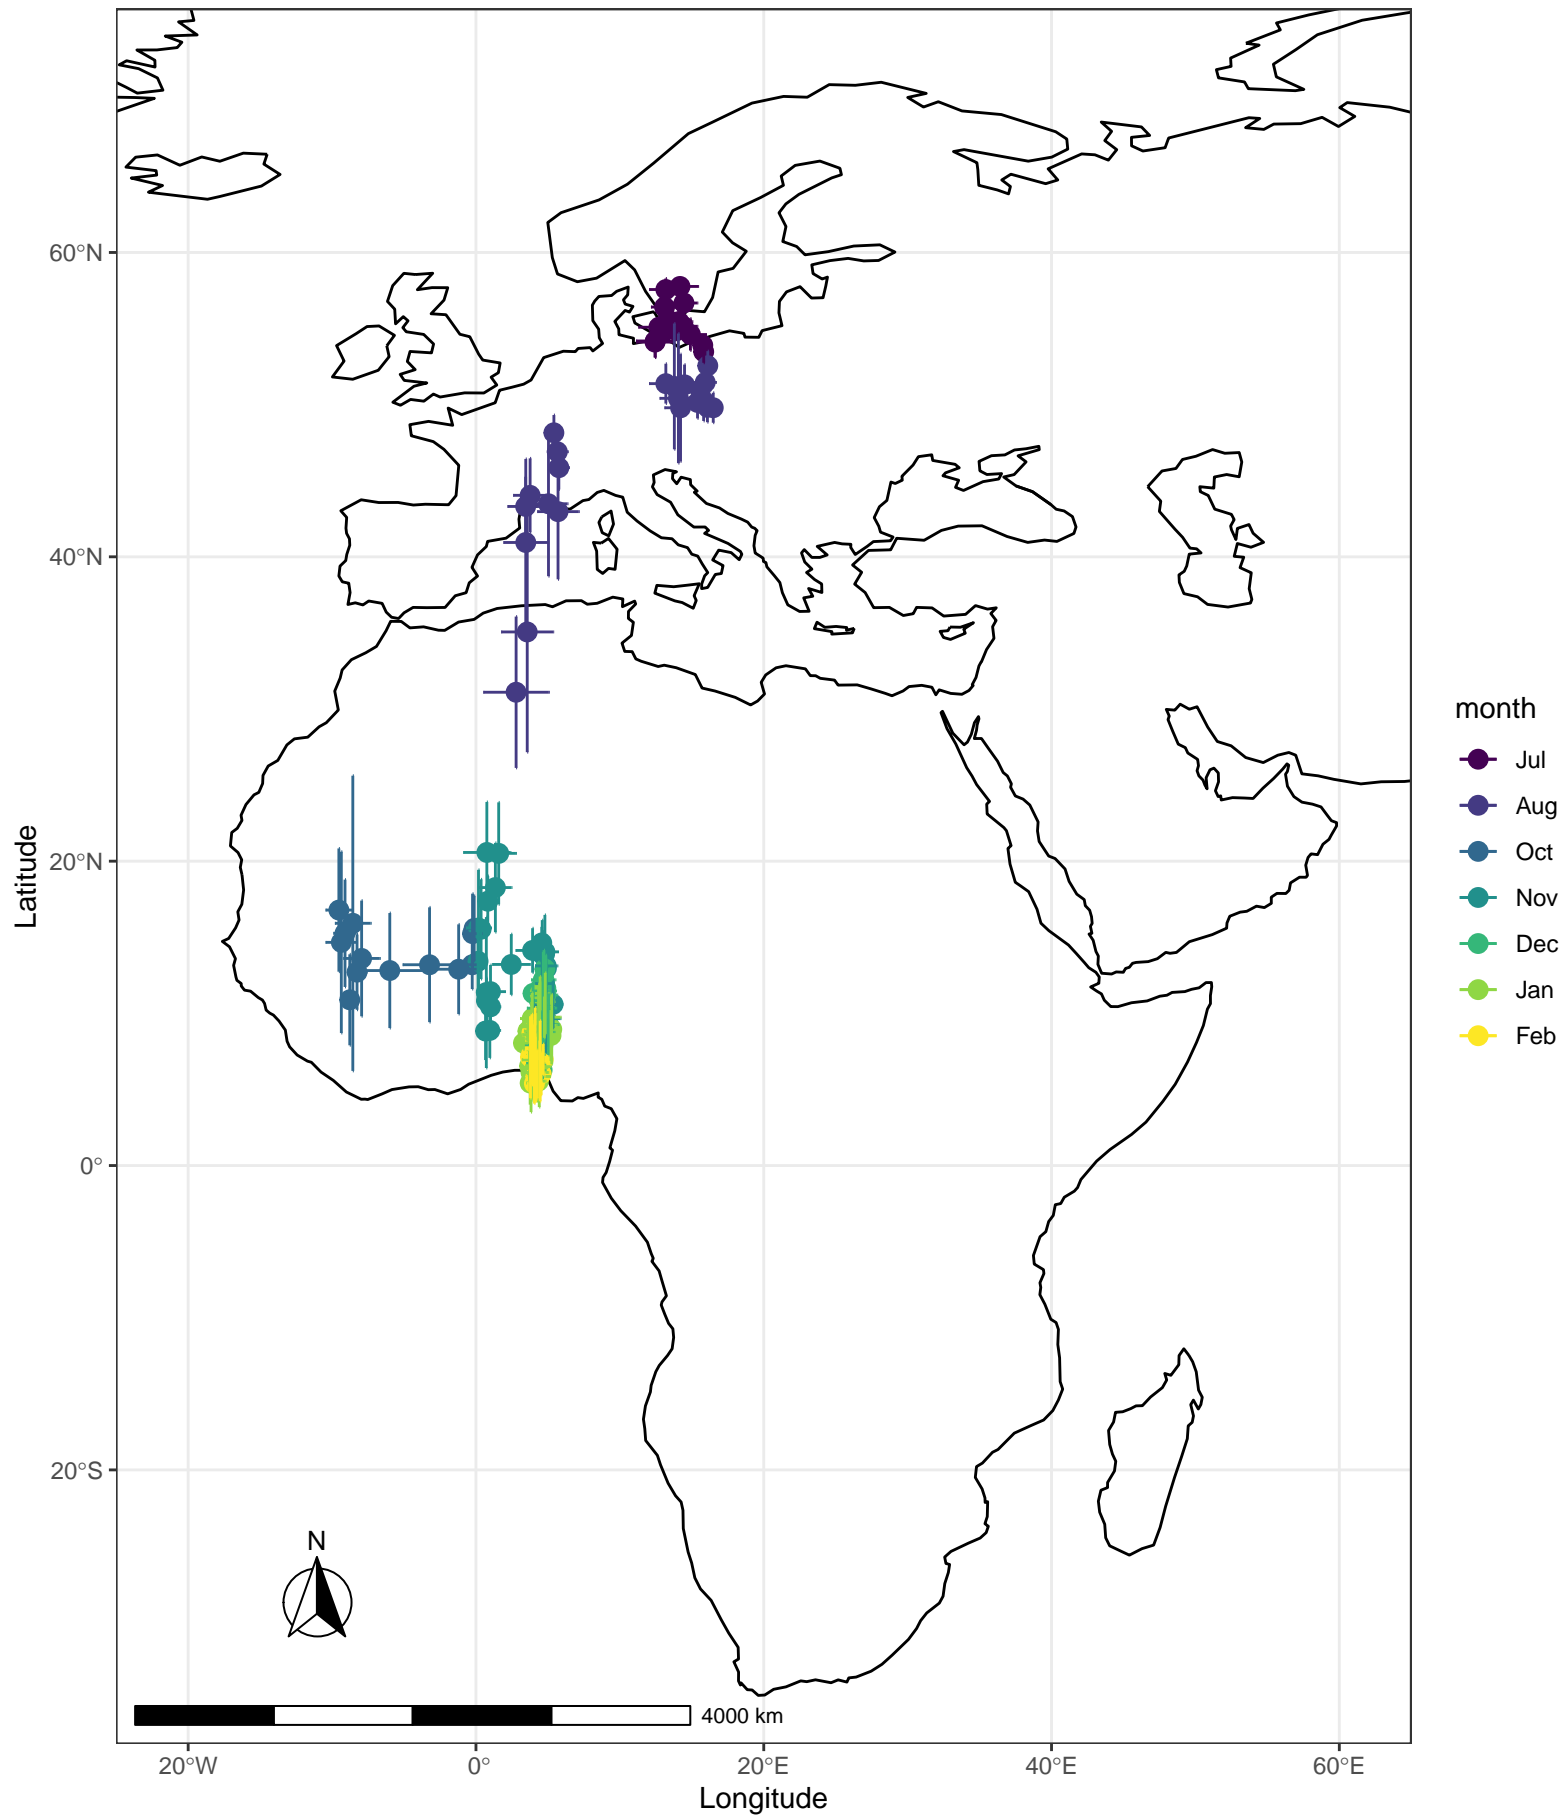

BM239

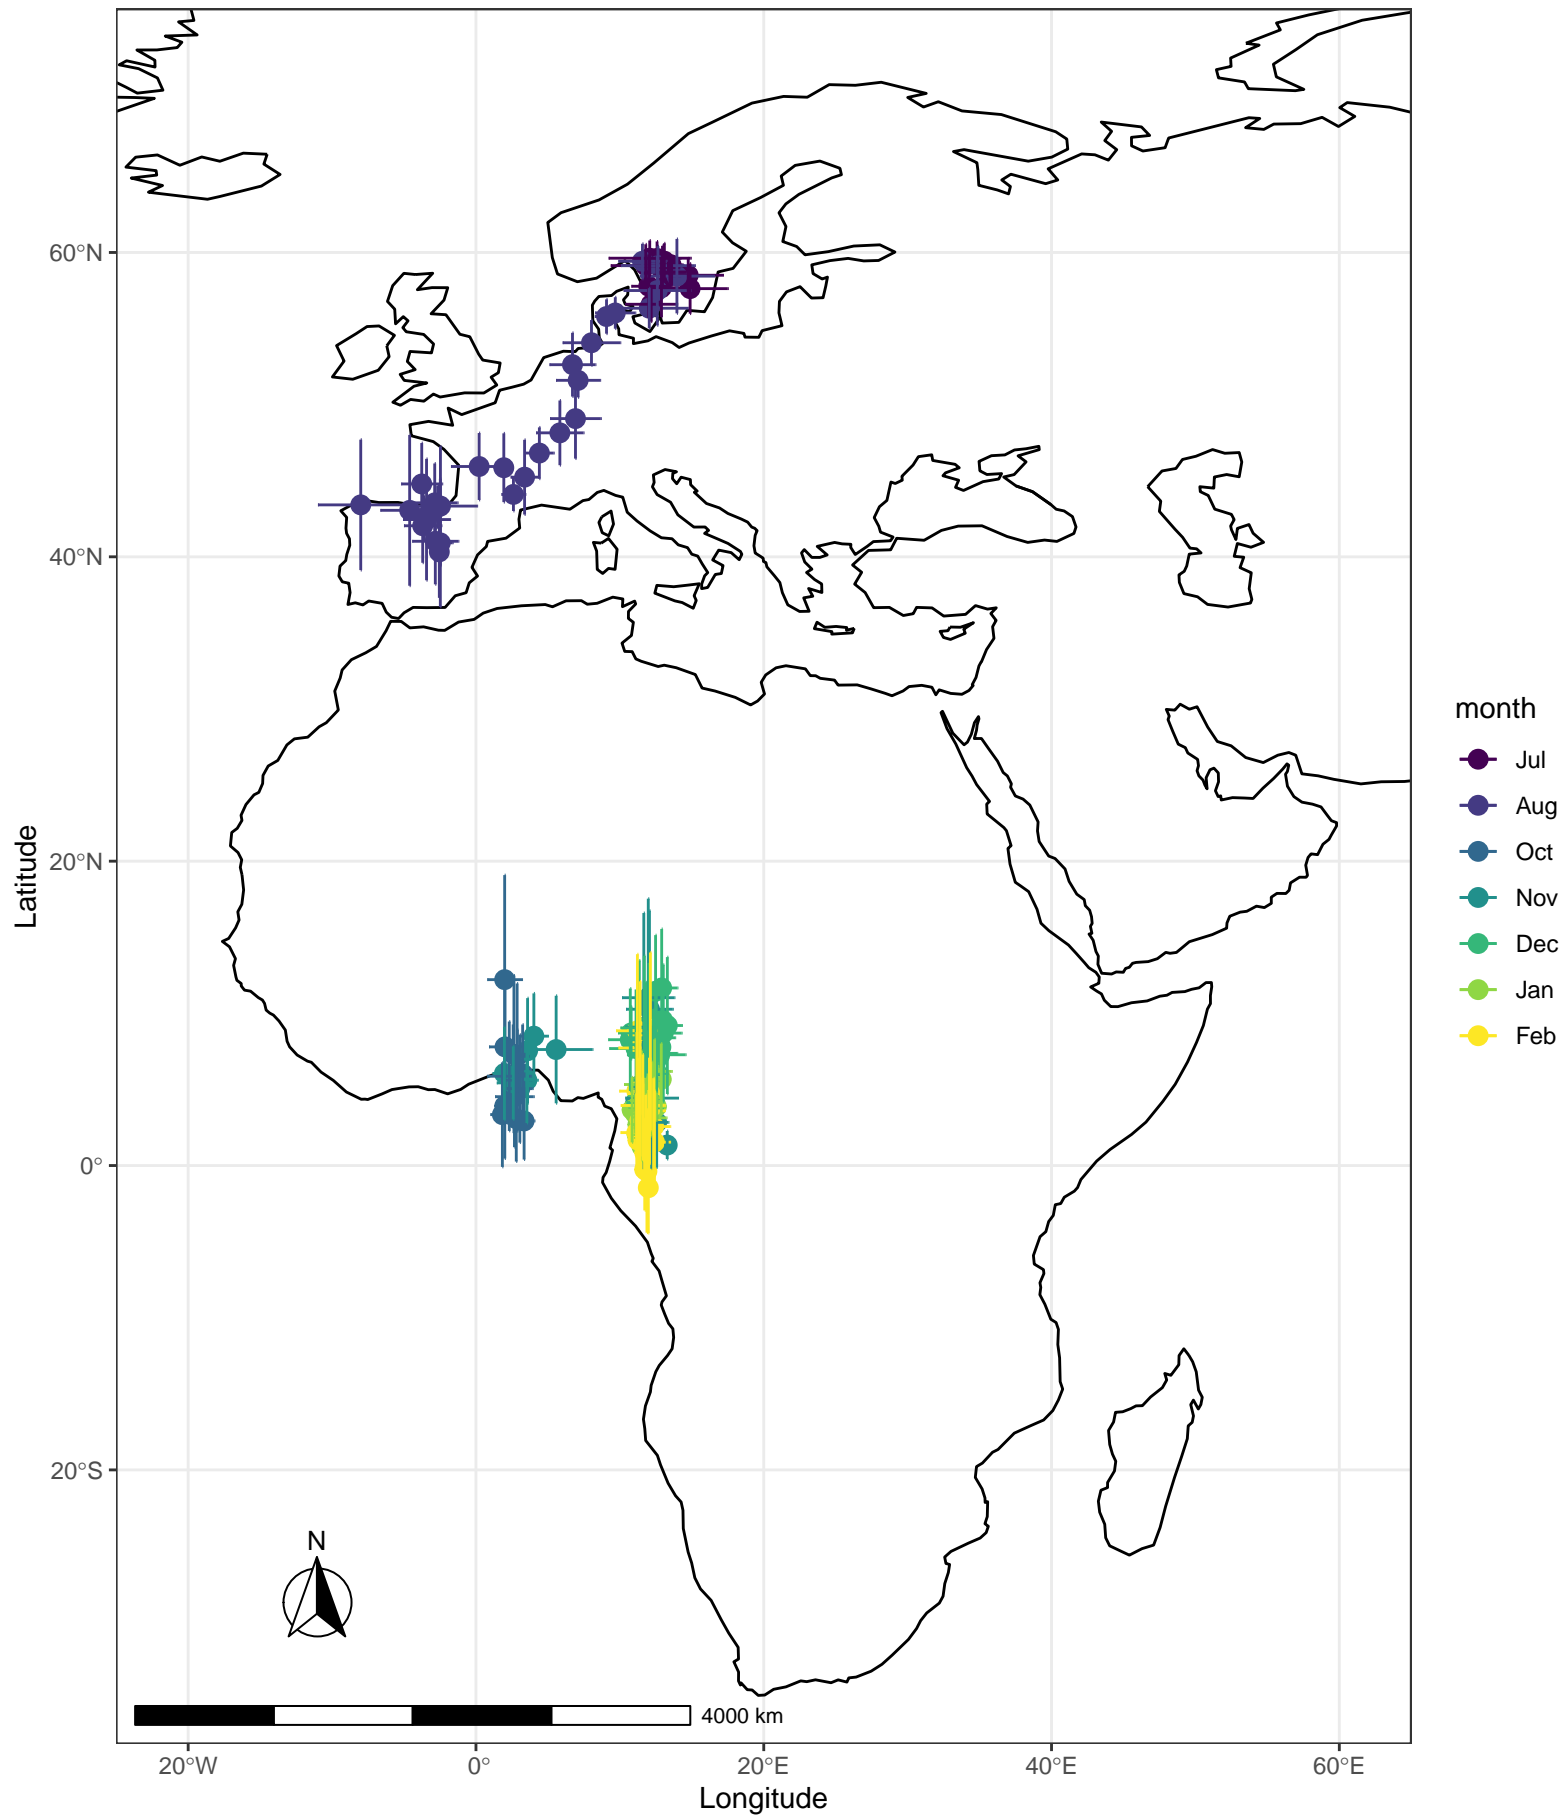

BM204

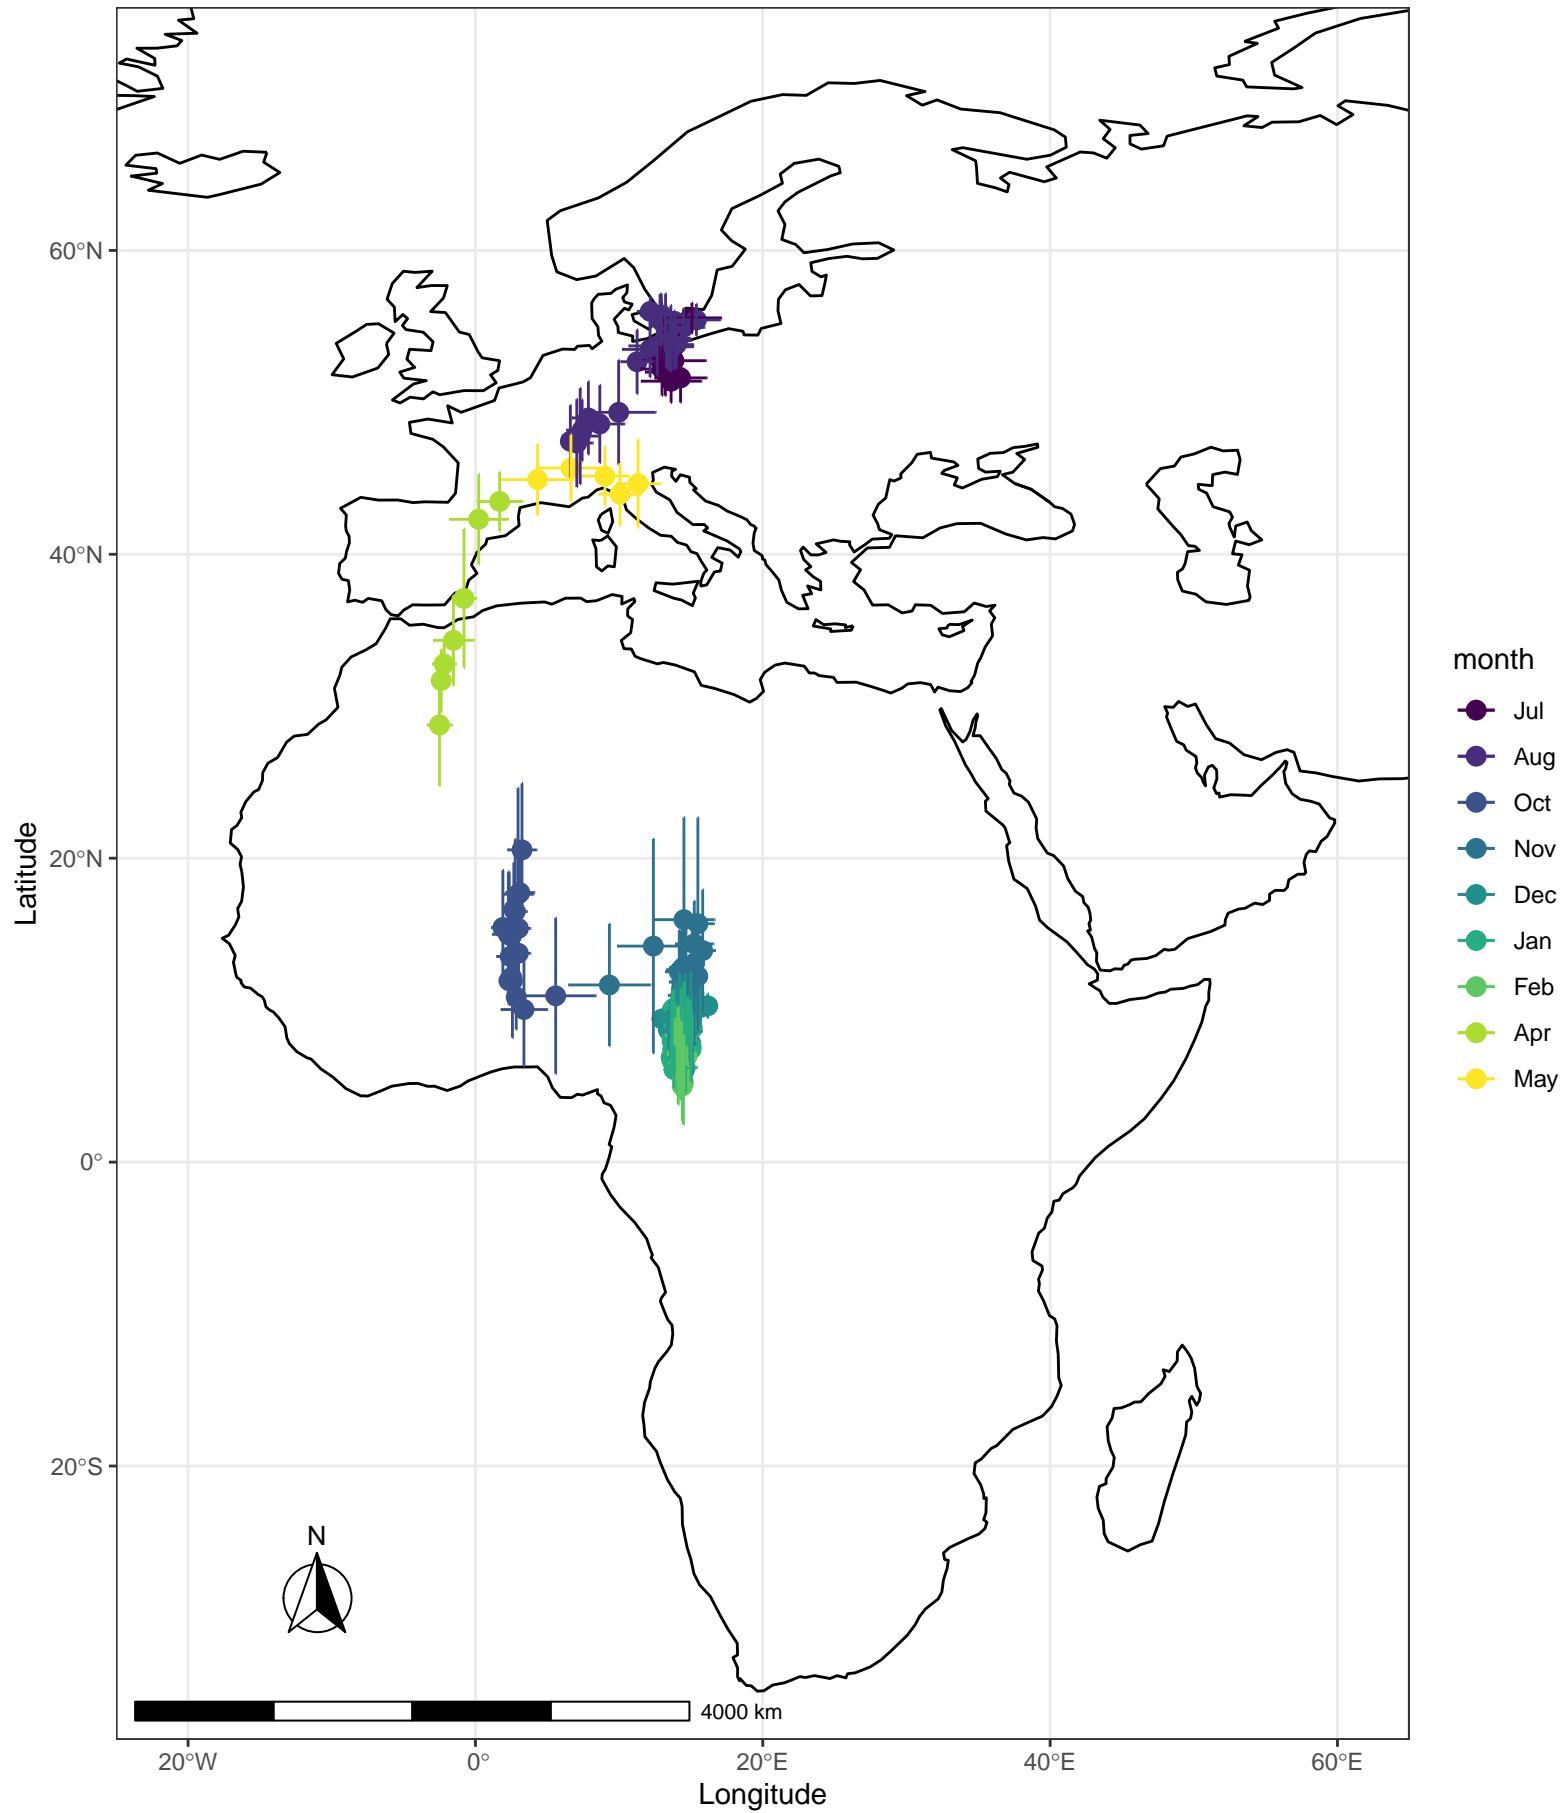

BM214

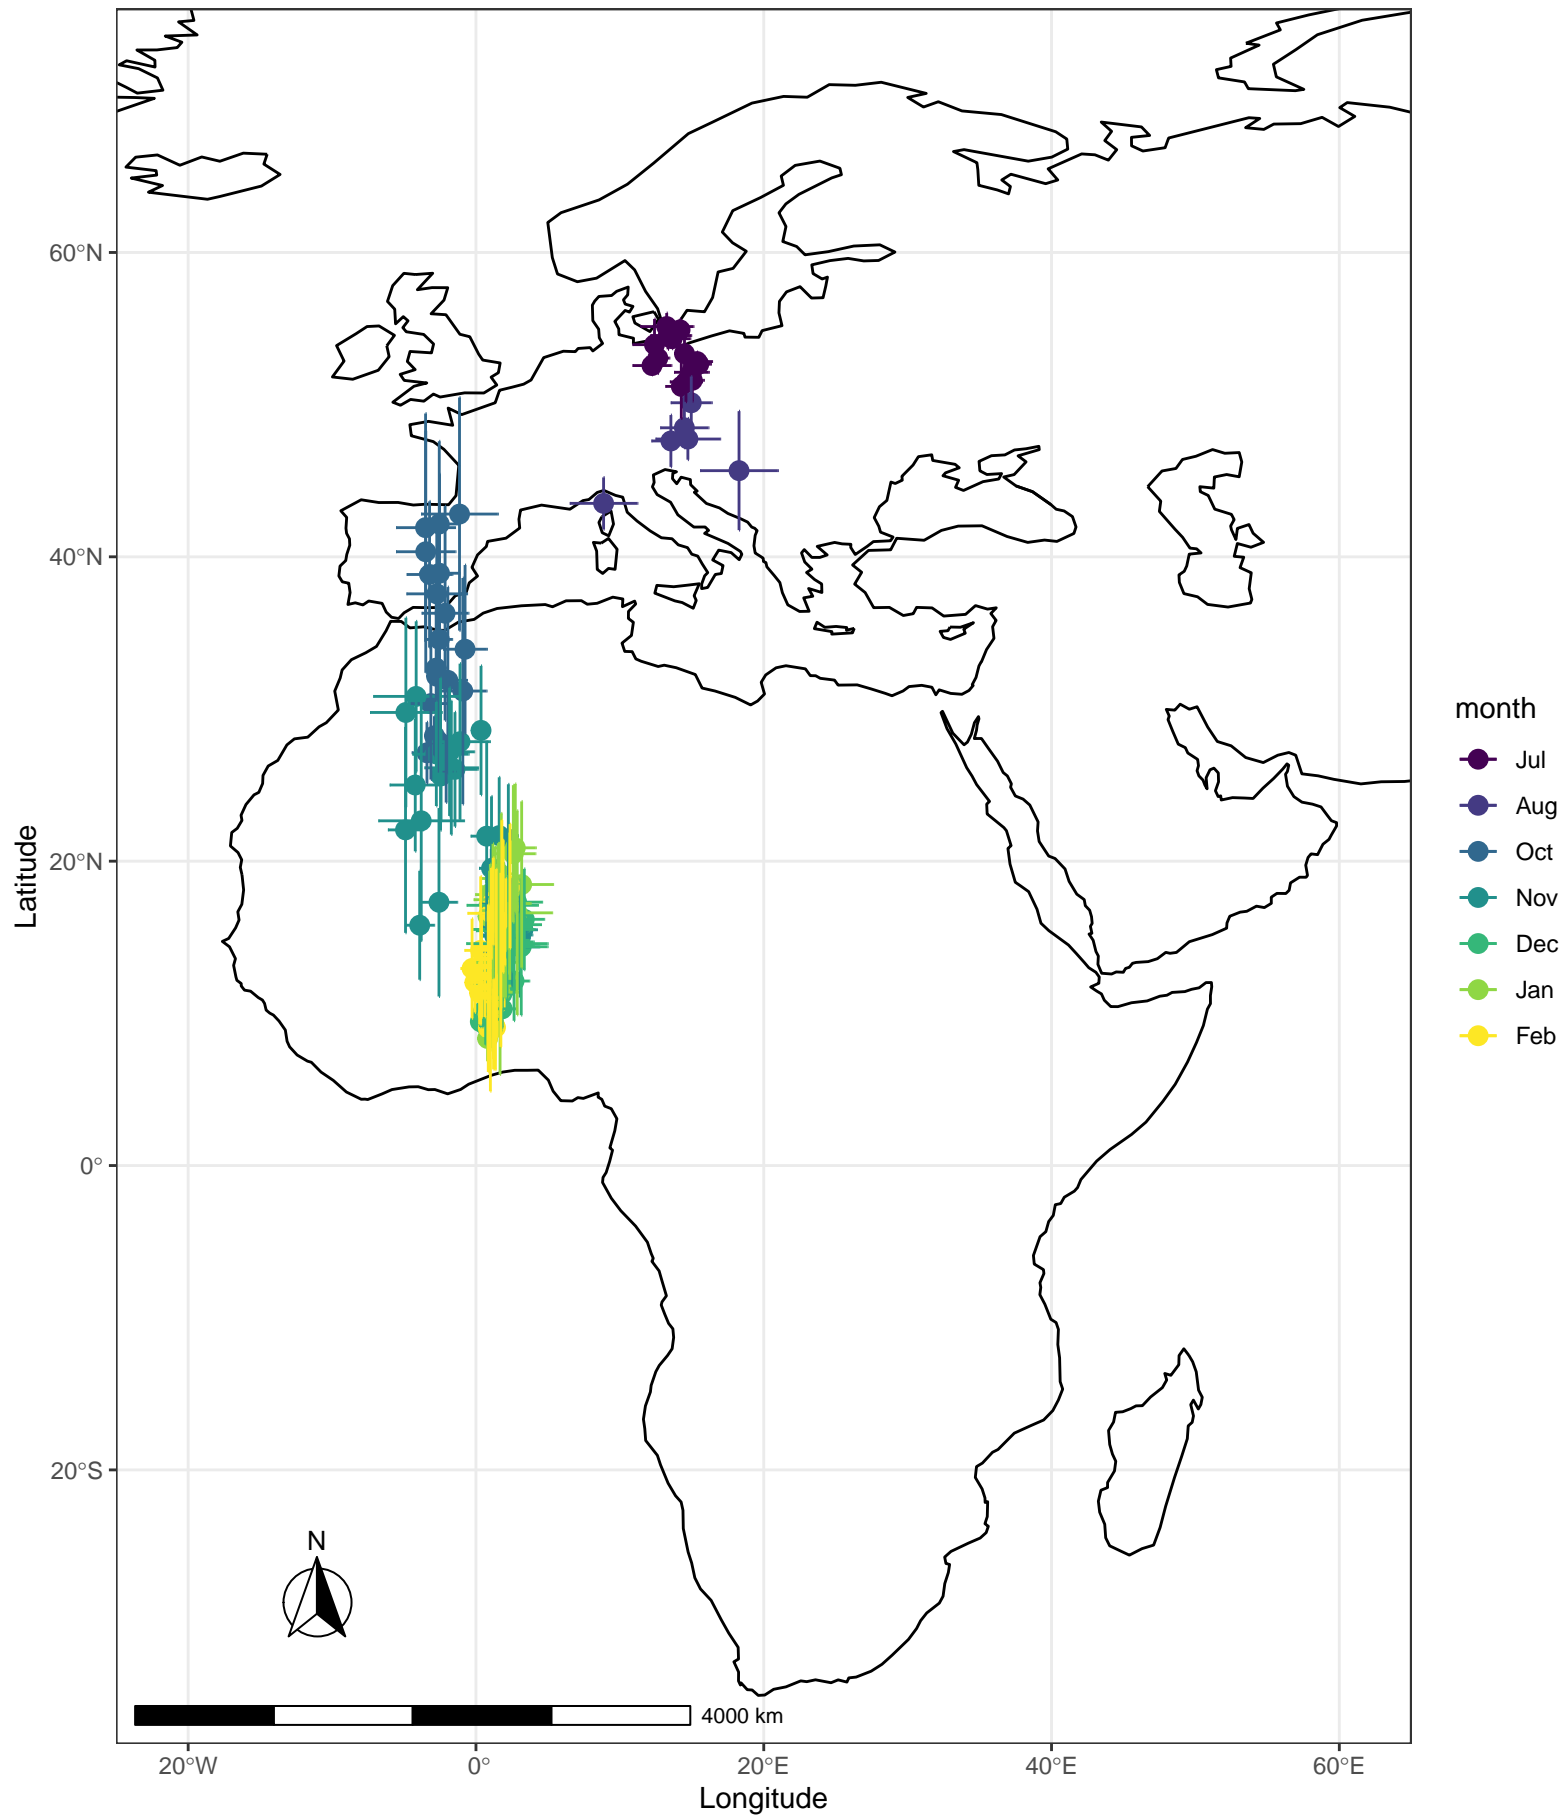

BM225

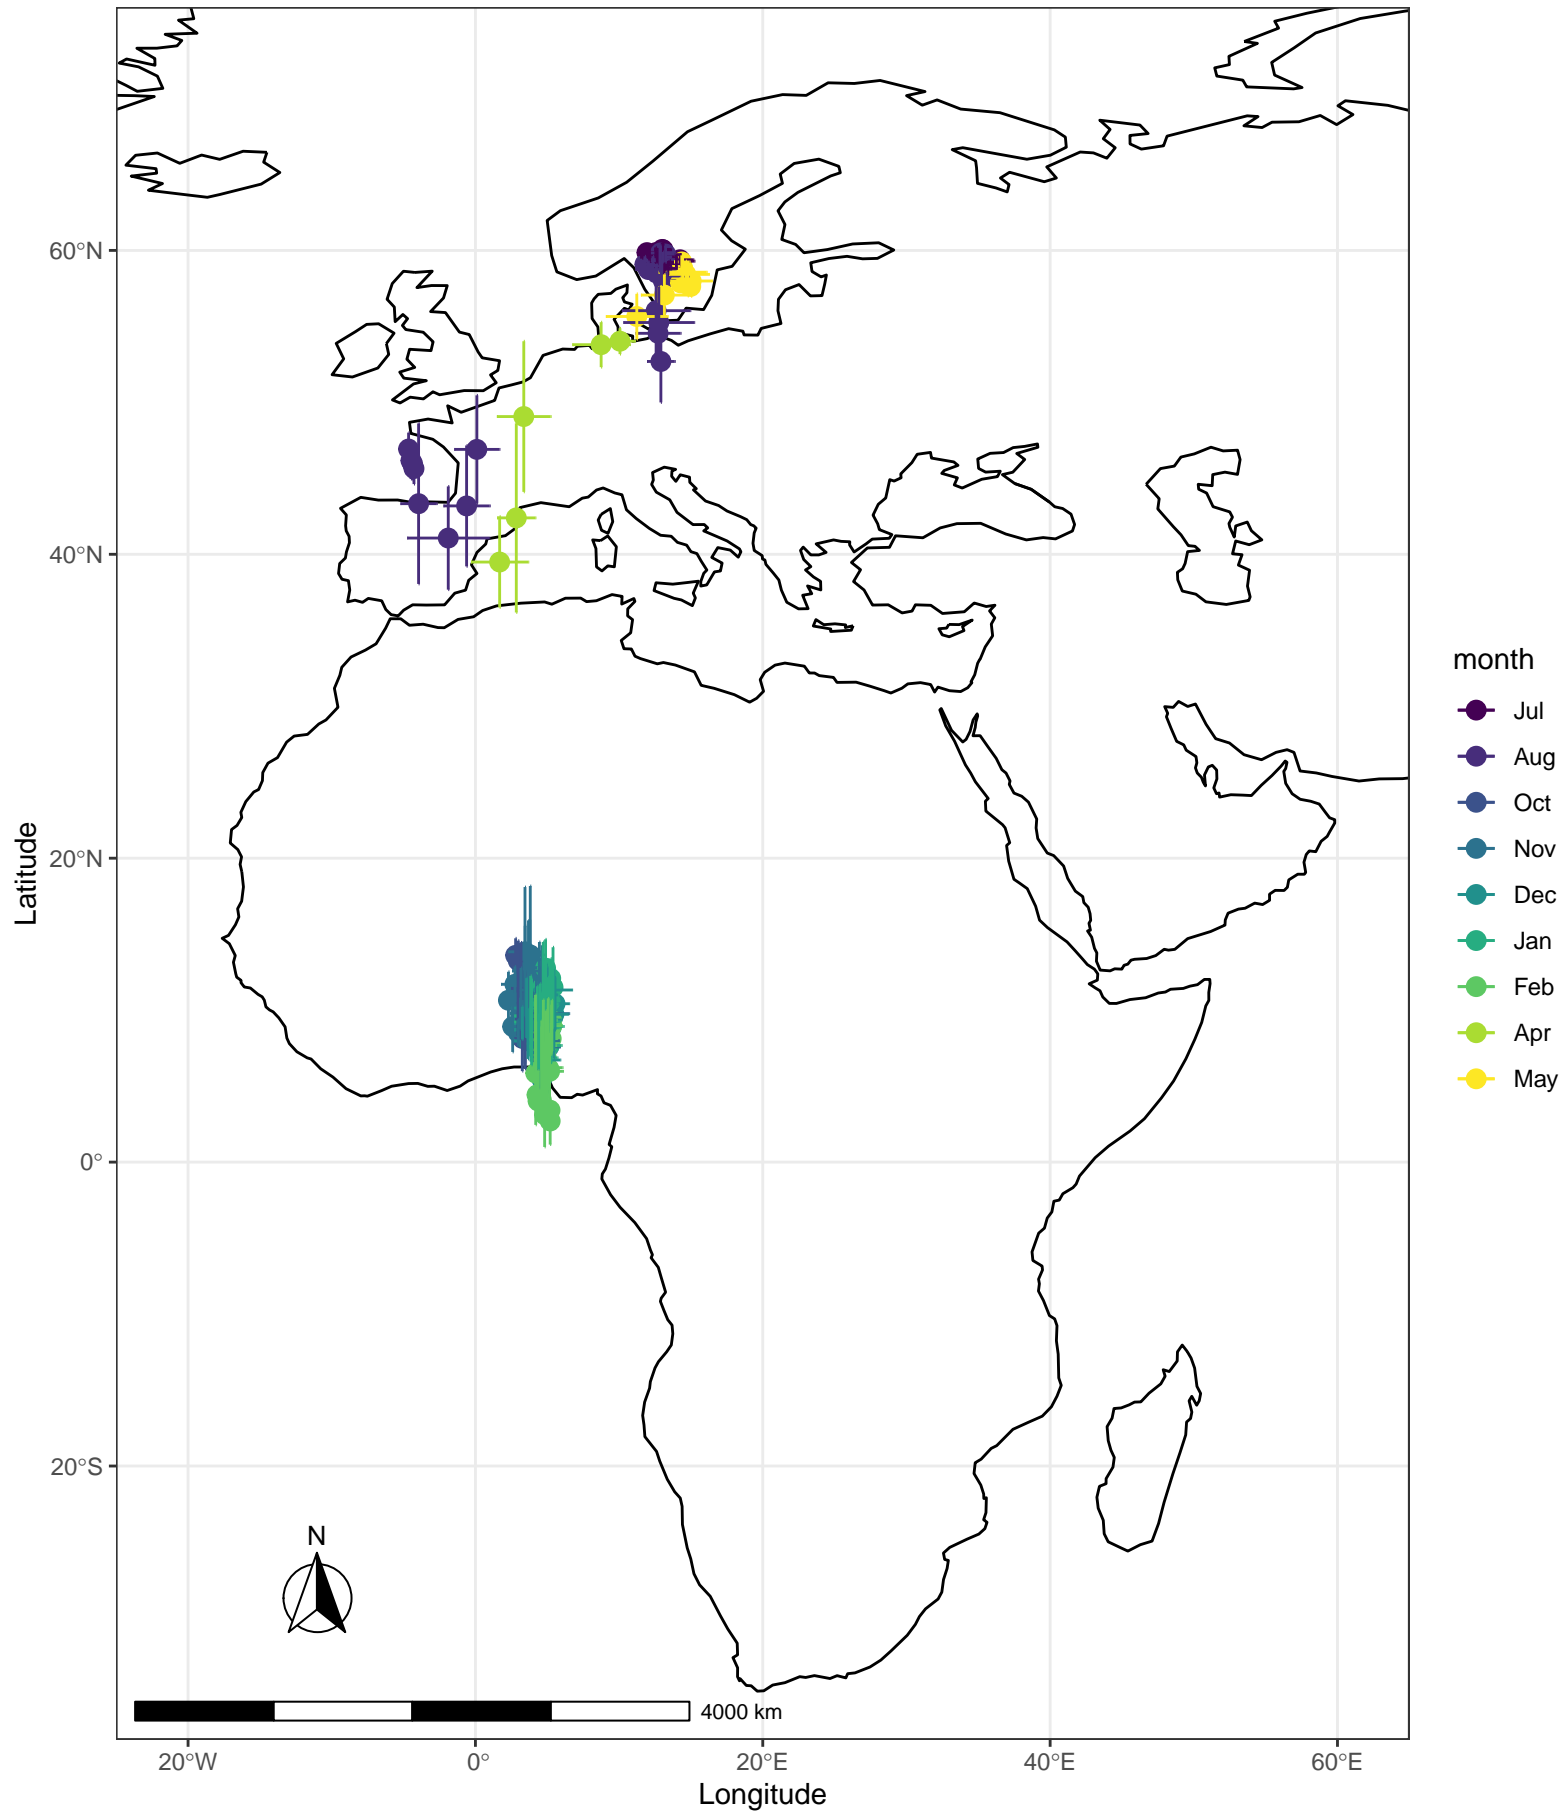

BM213

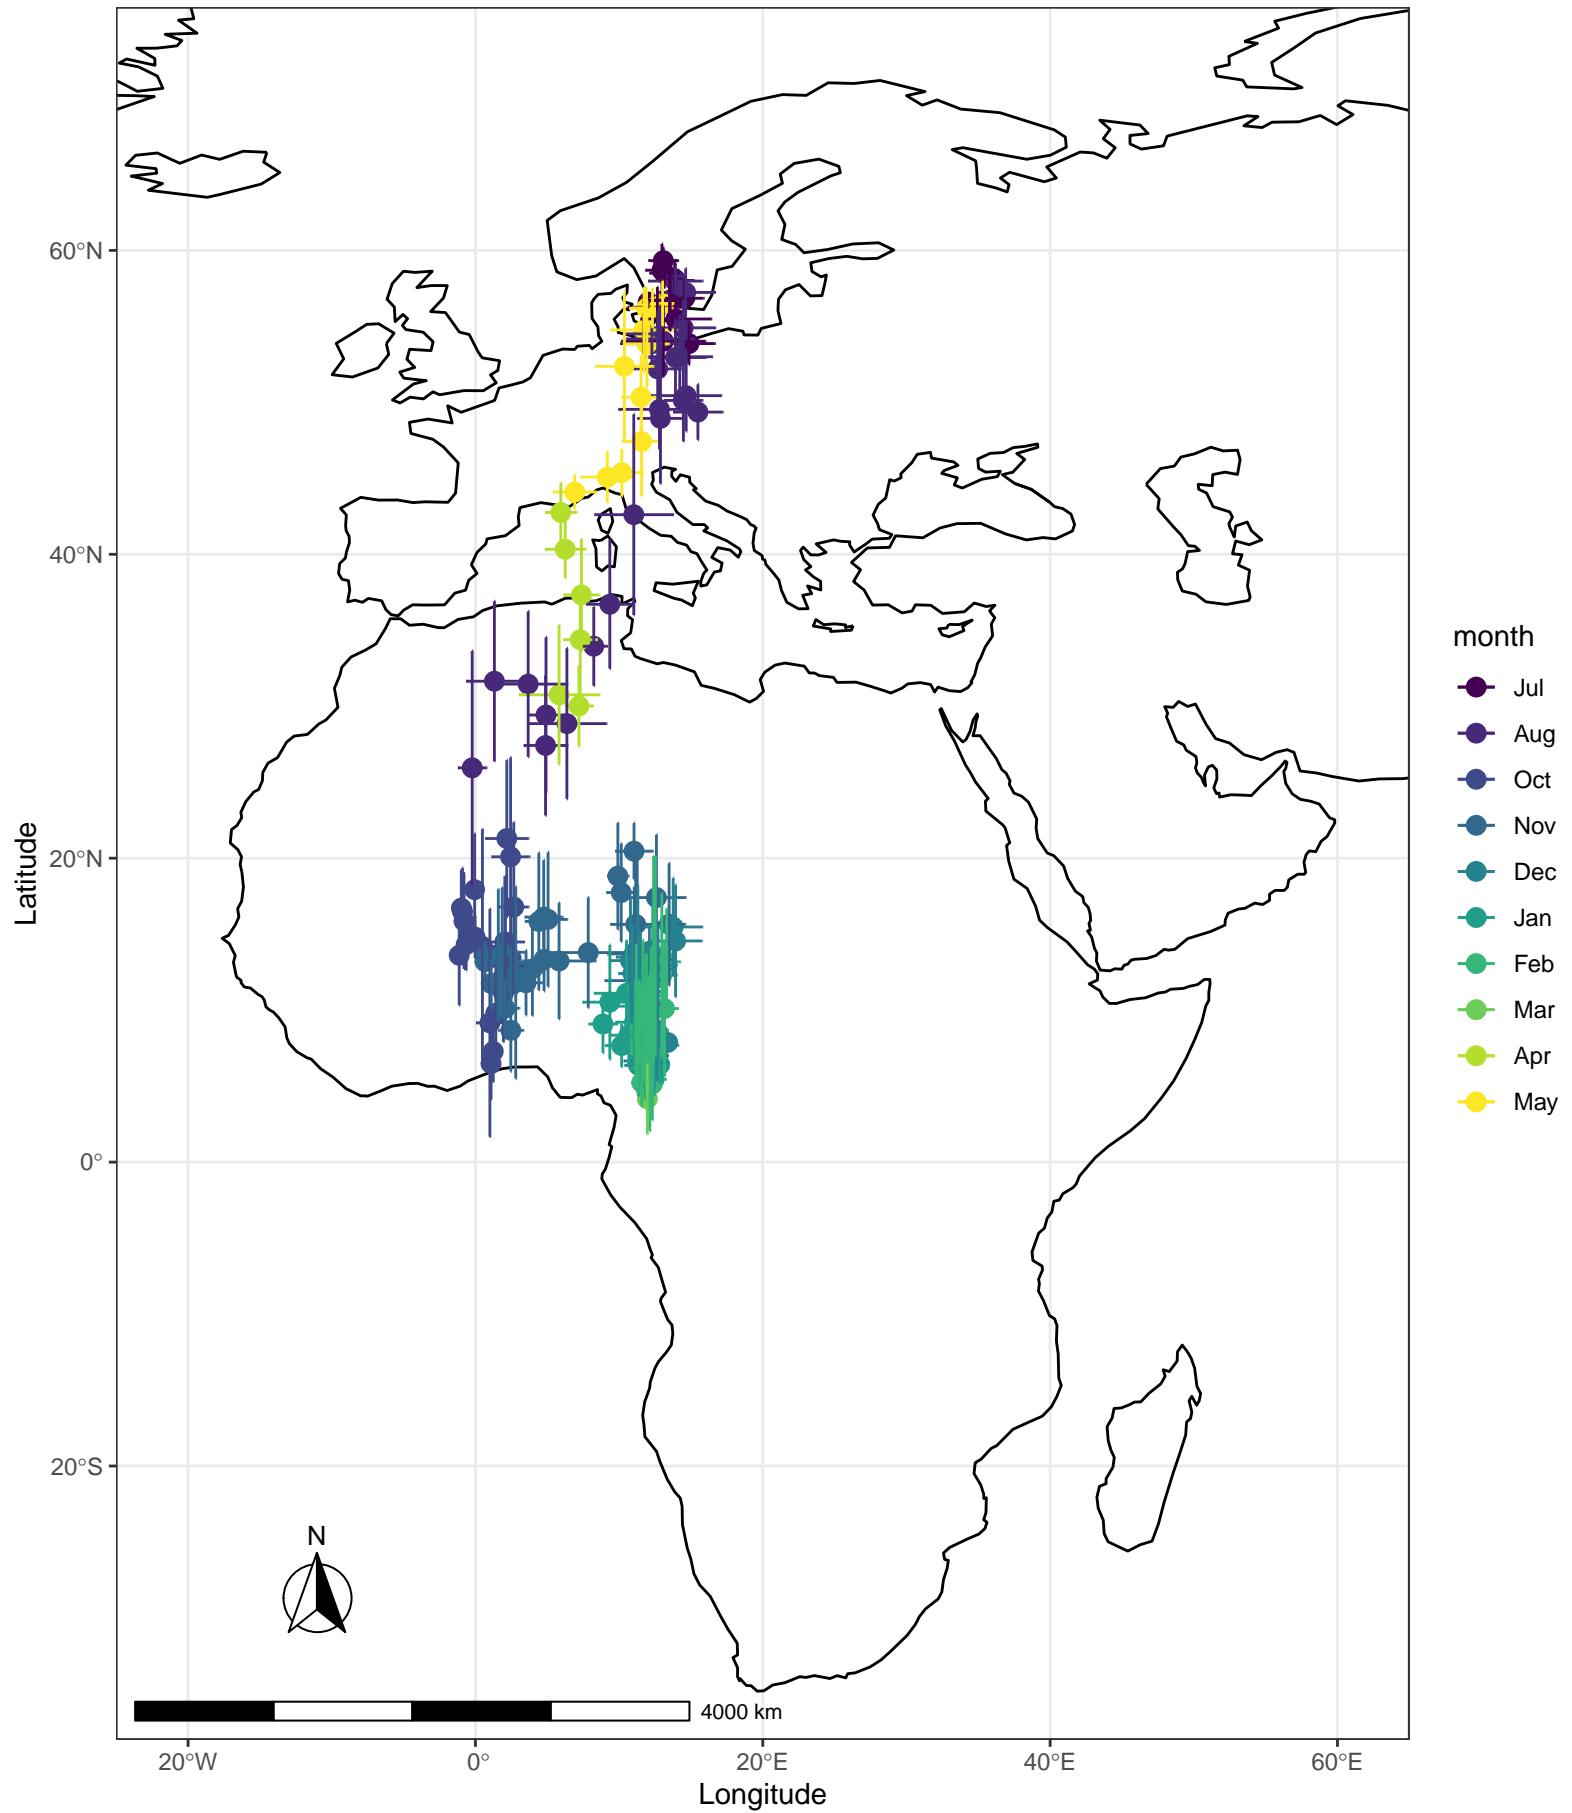

BN899

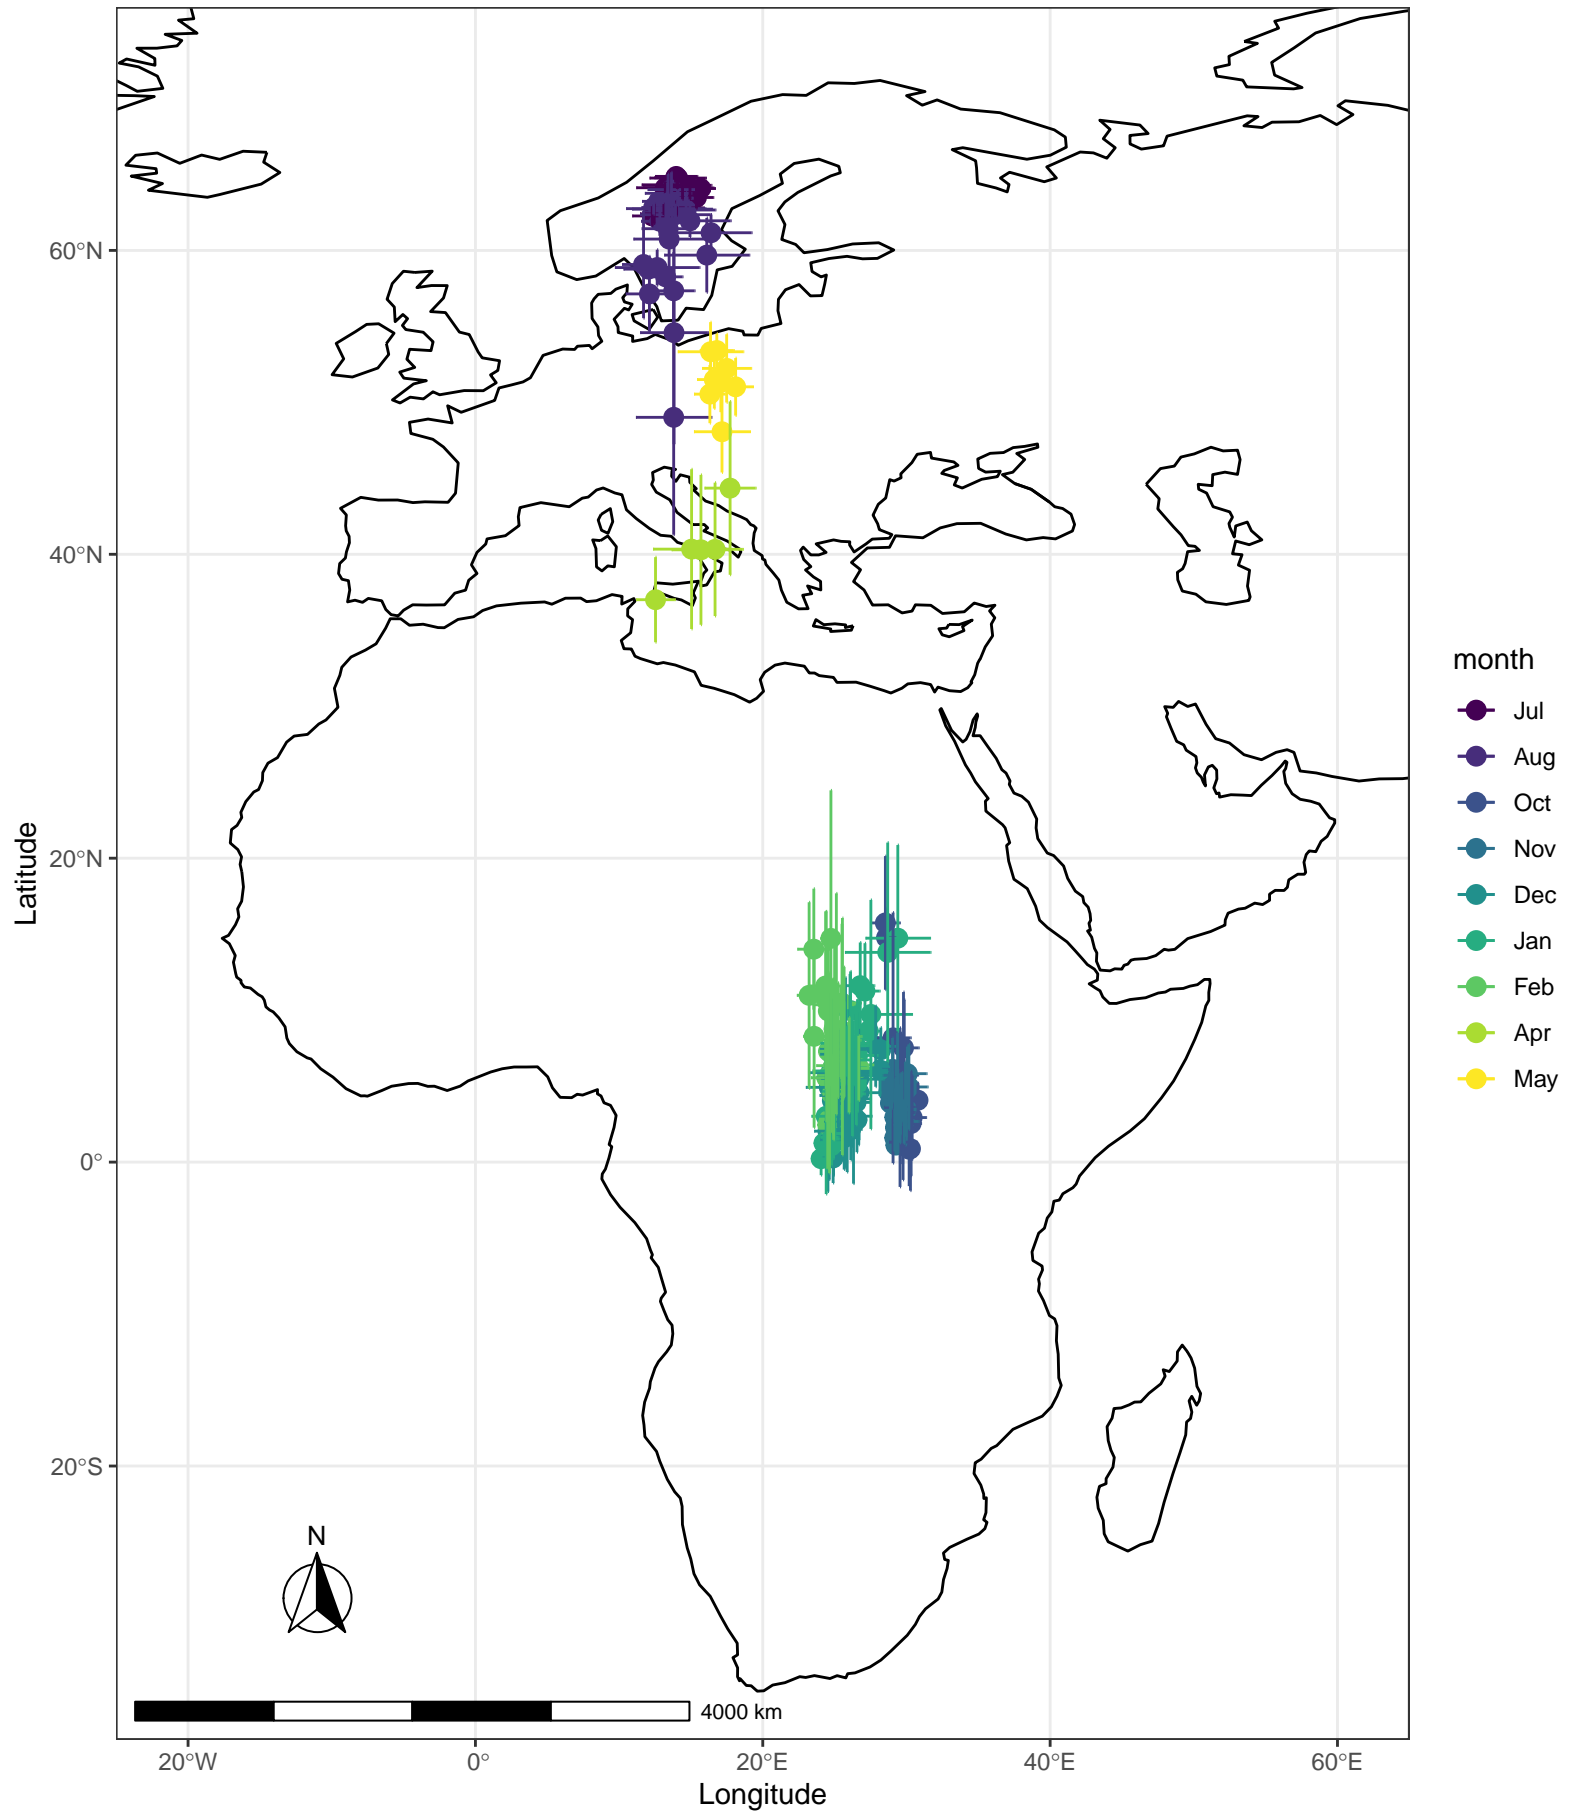

BN133

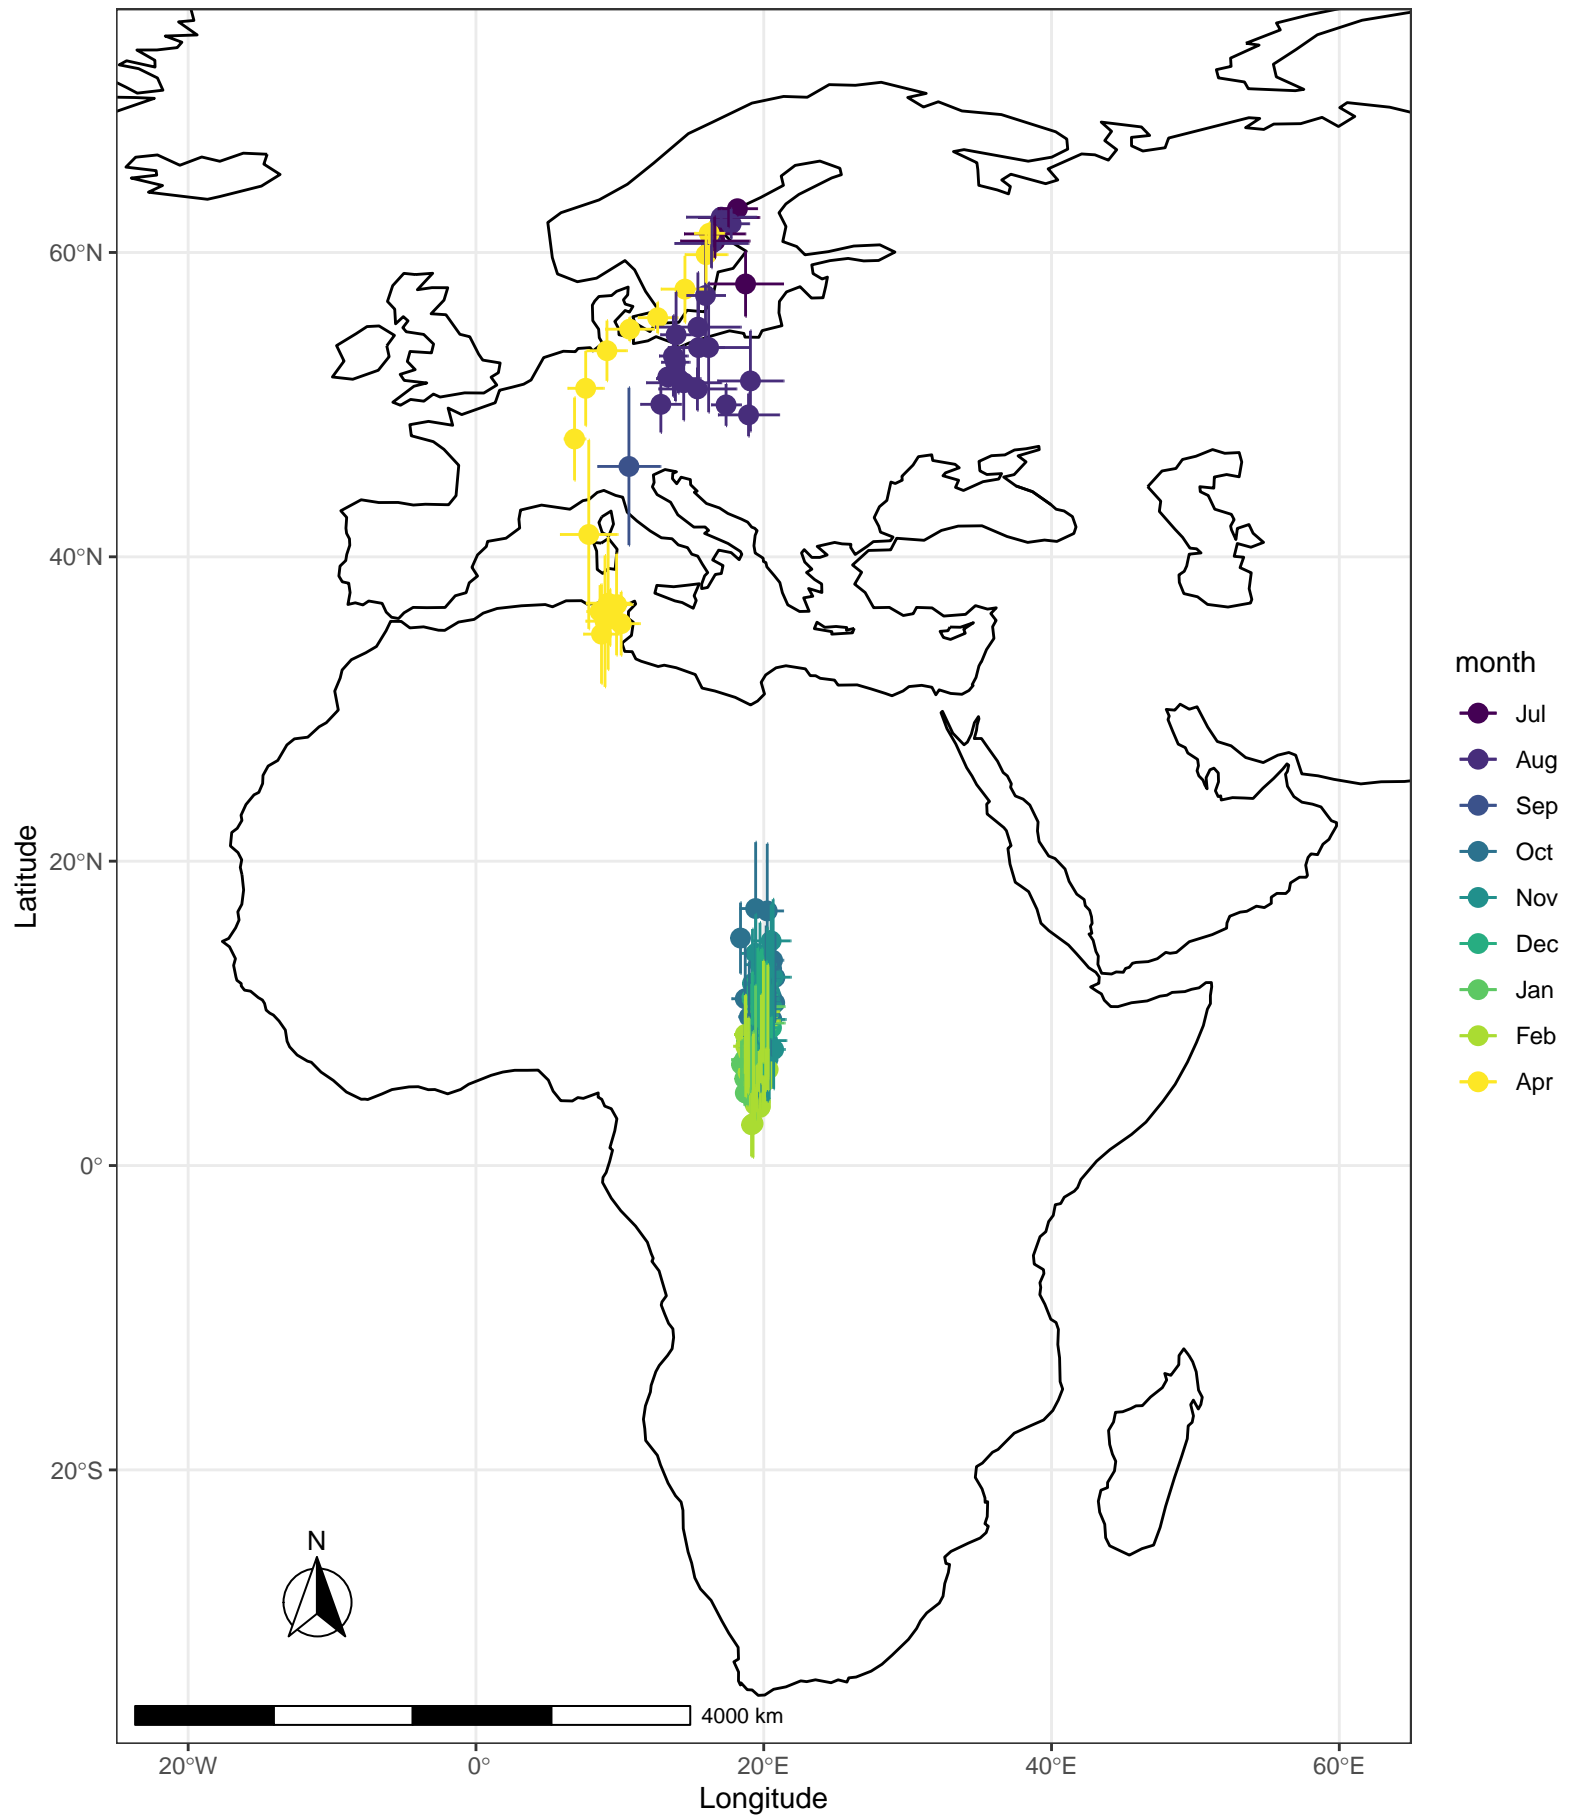



BM206

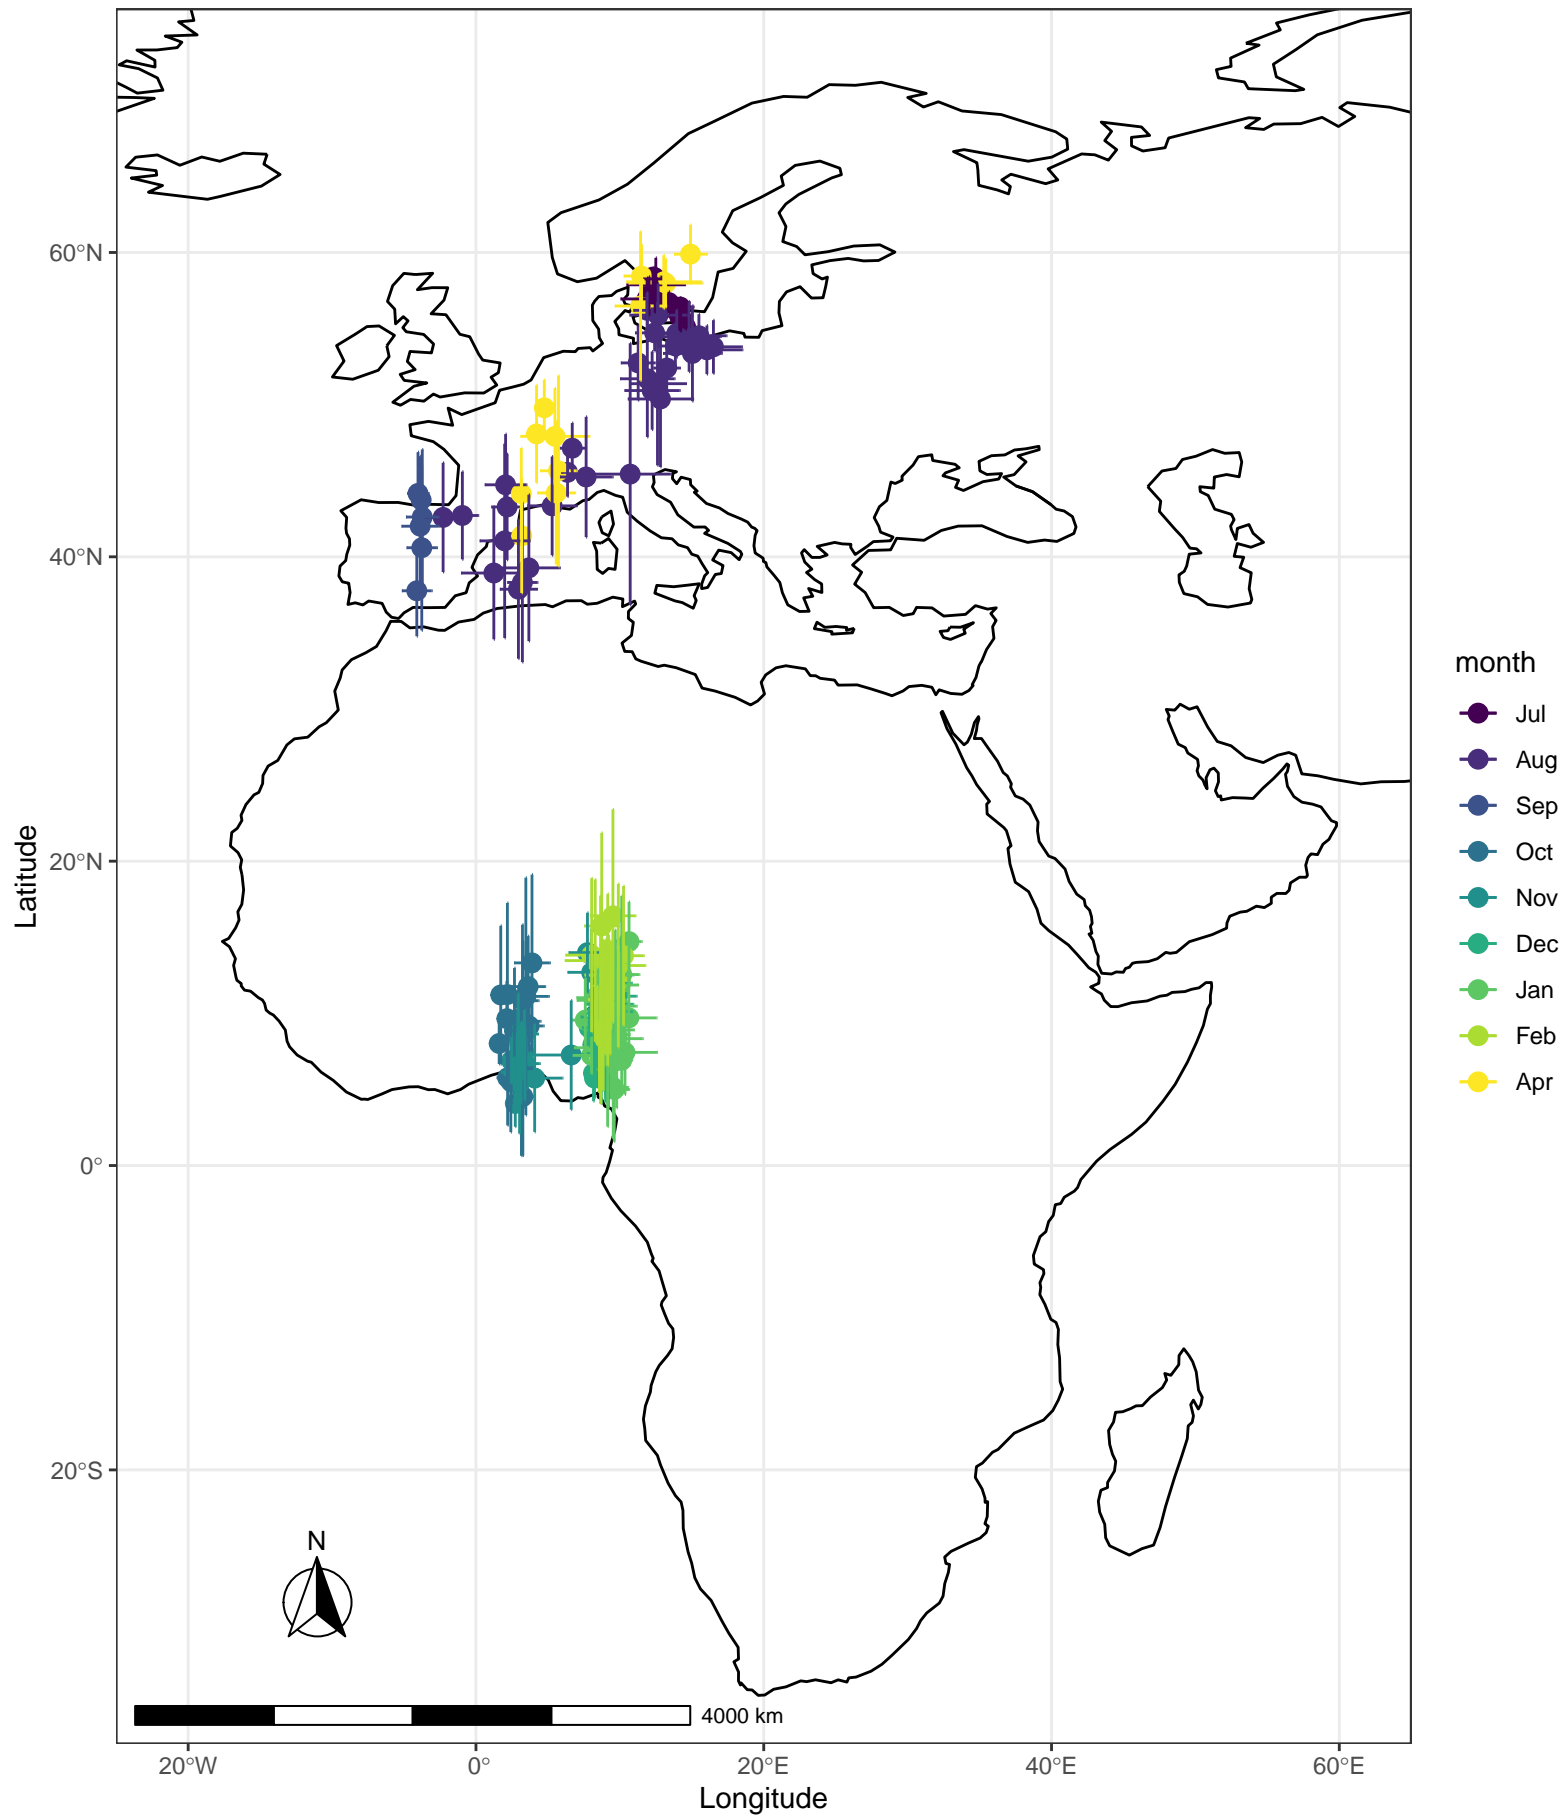

BY784

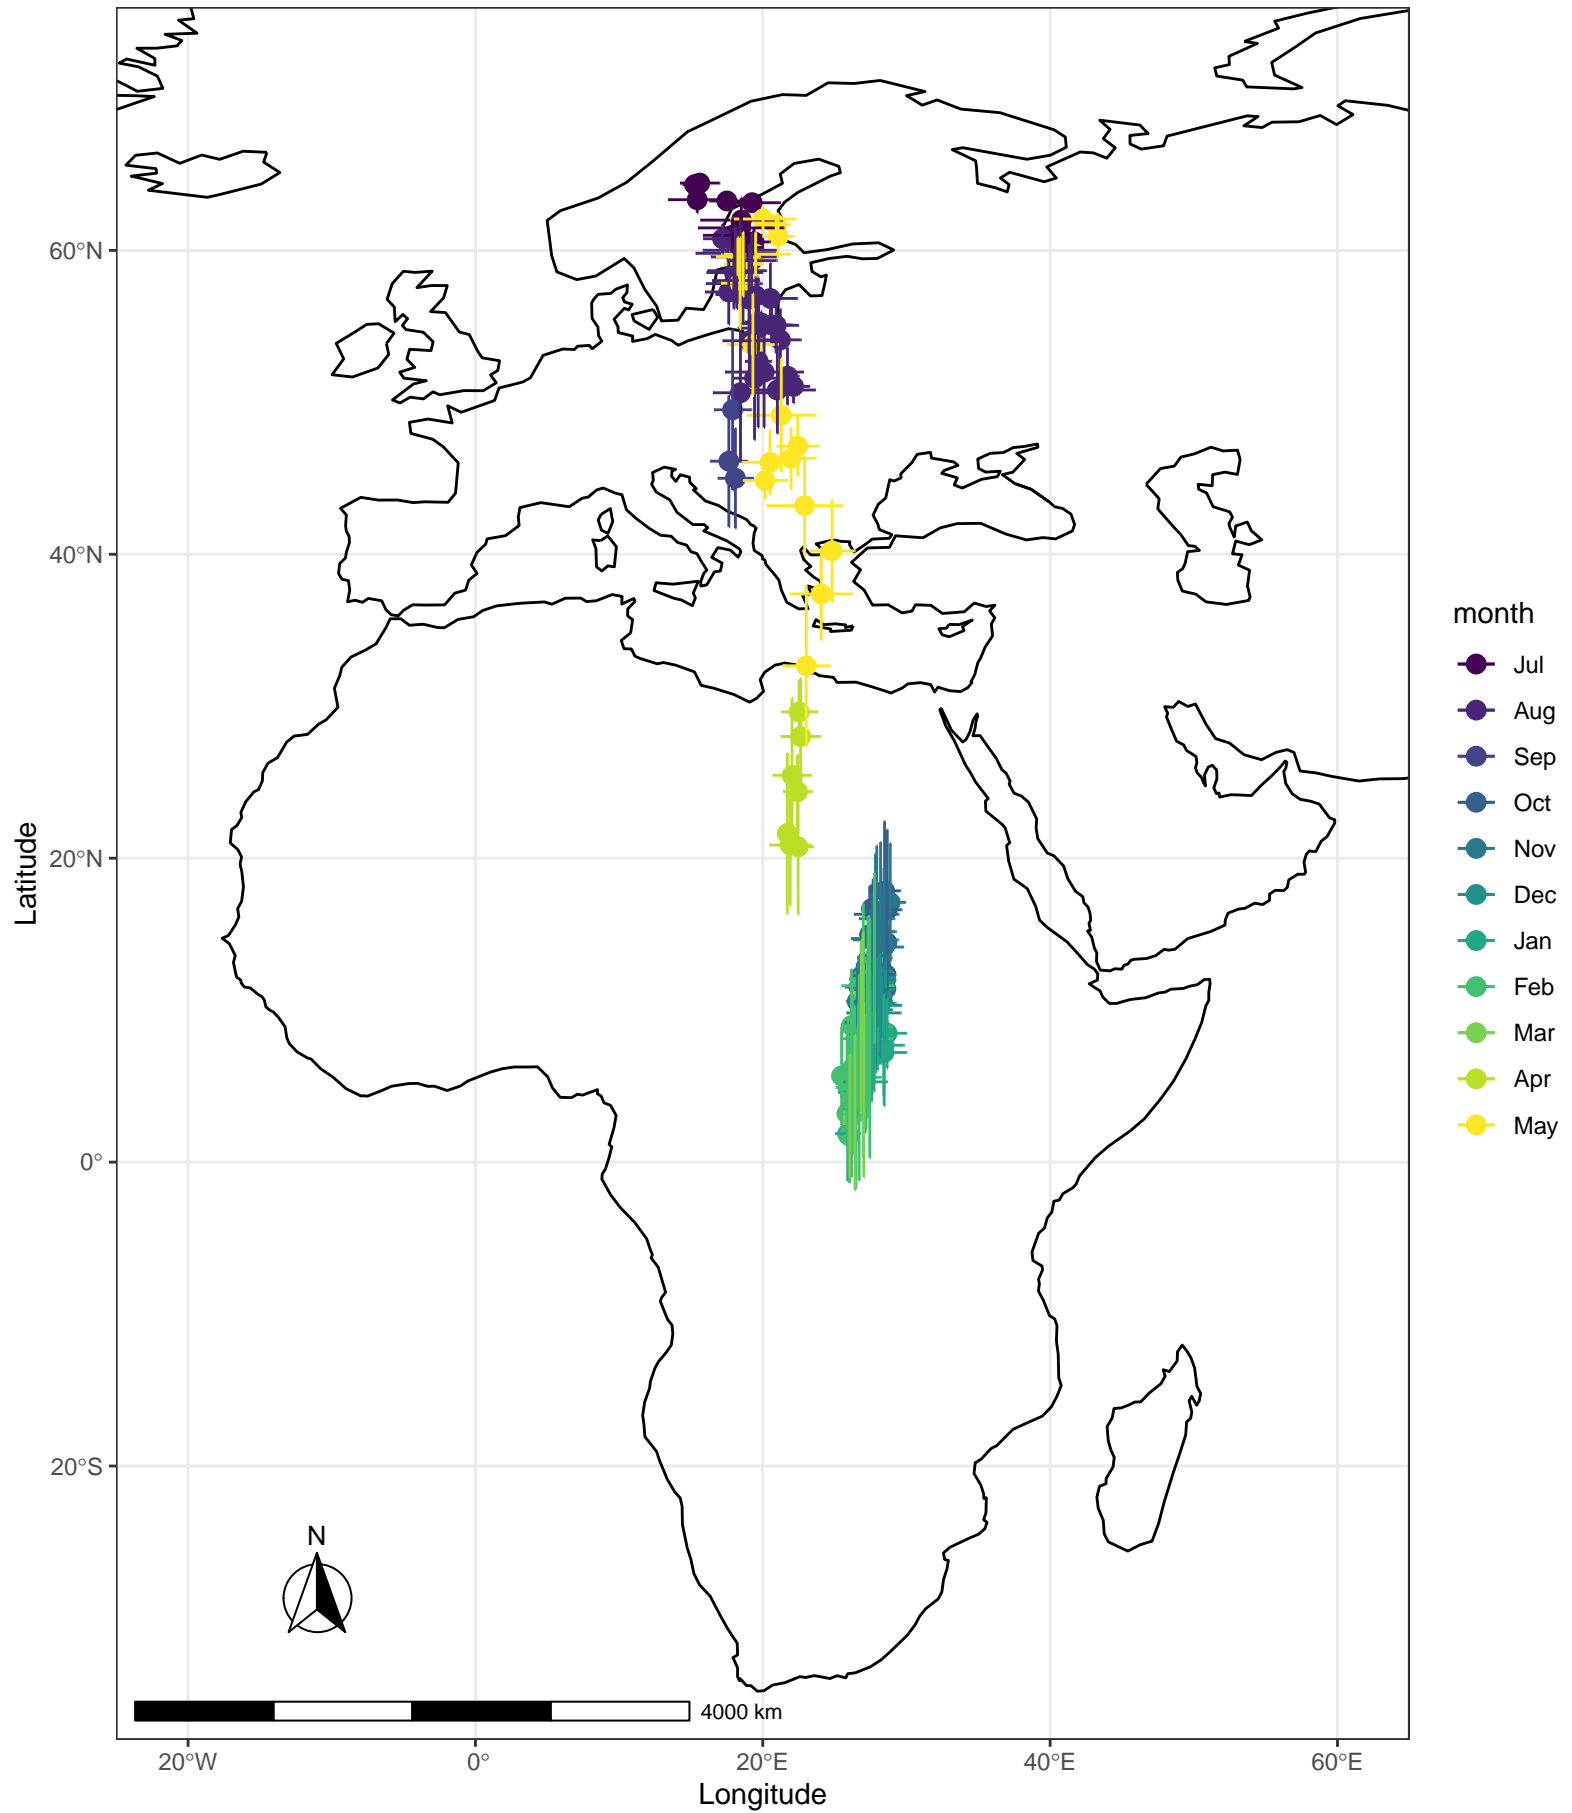

BY761

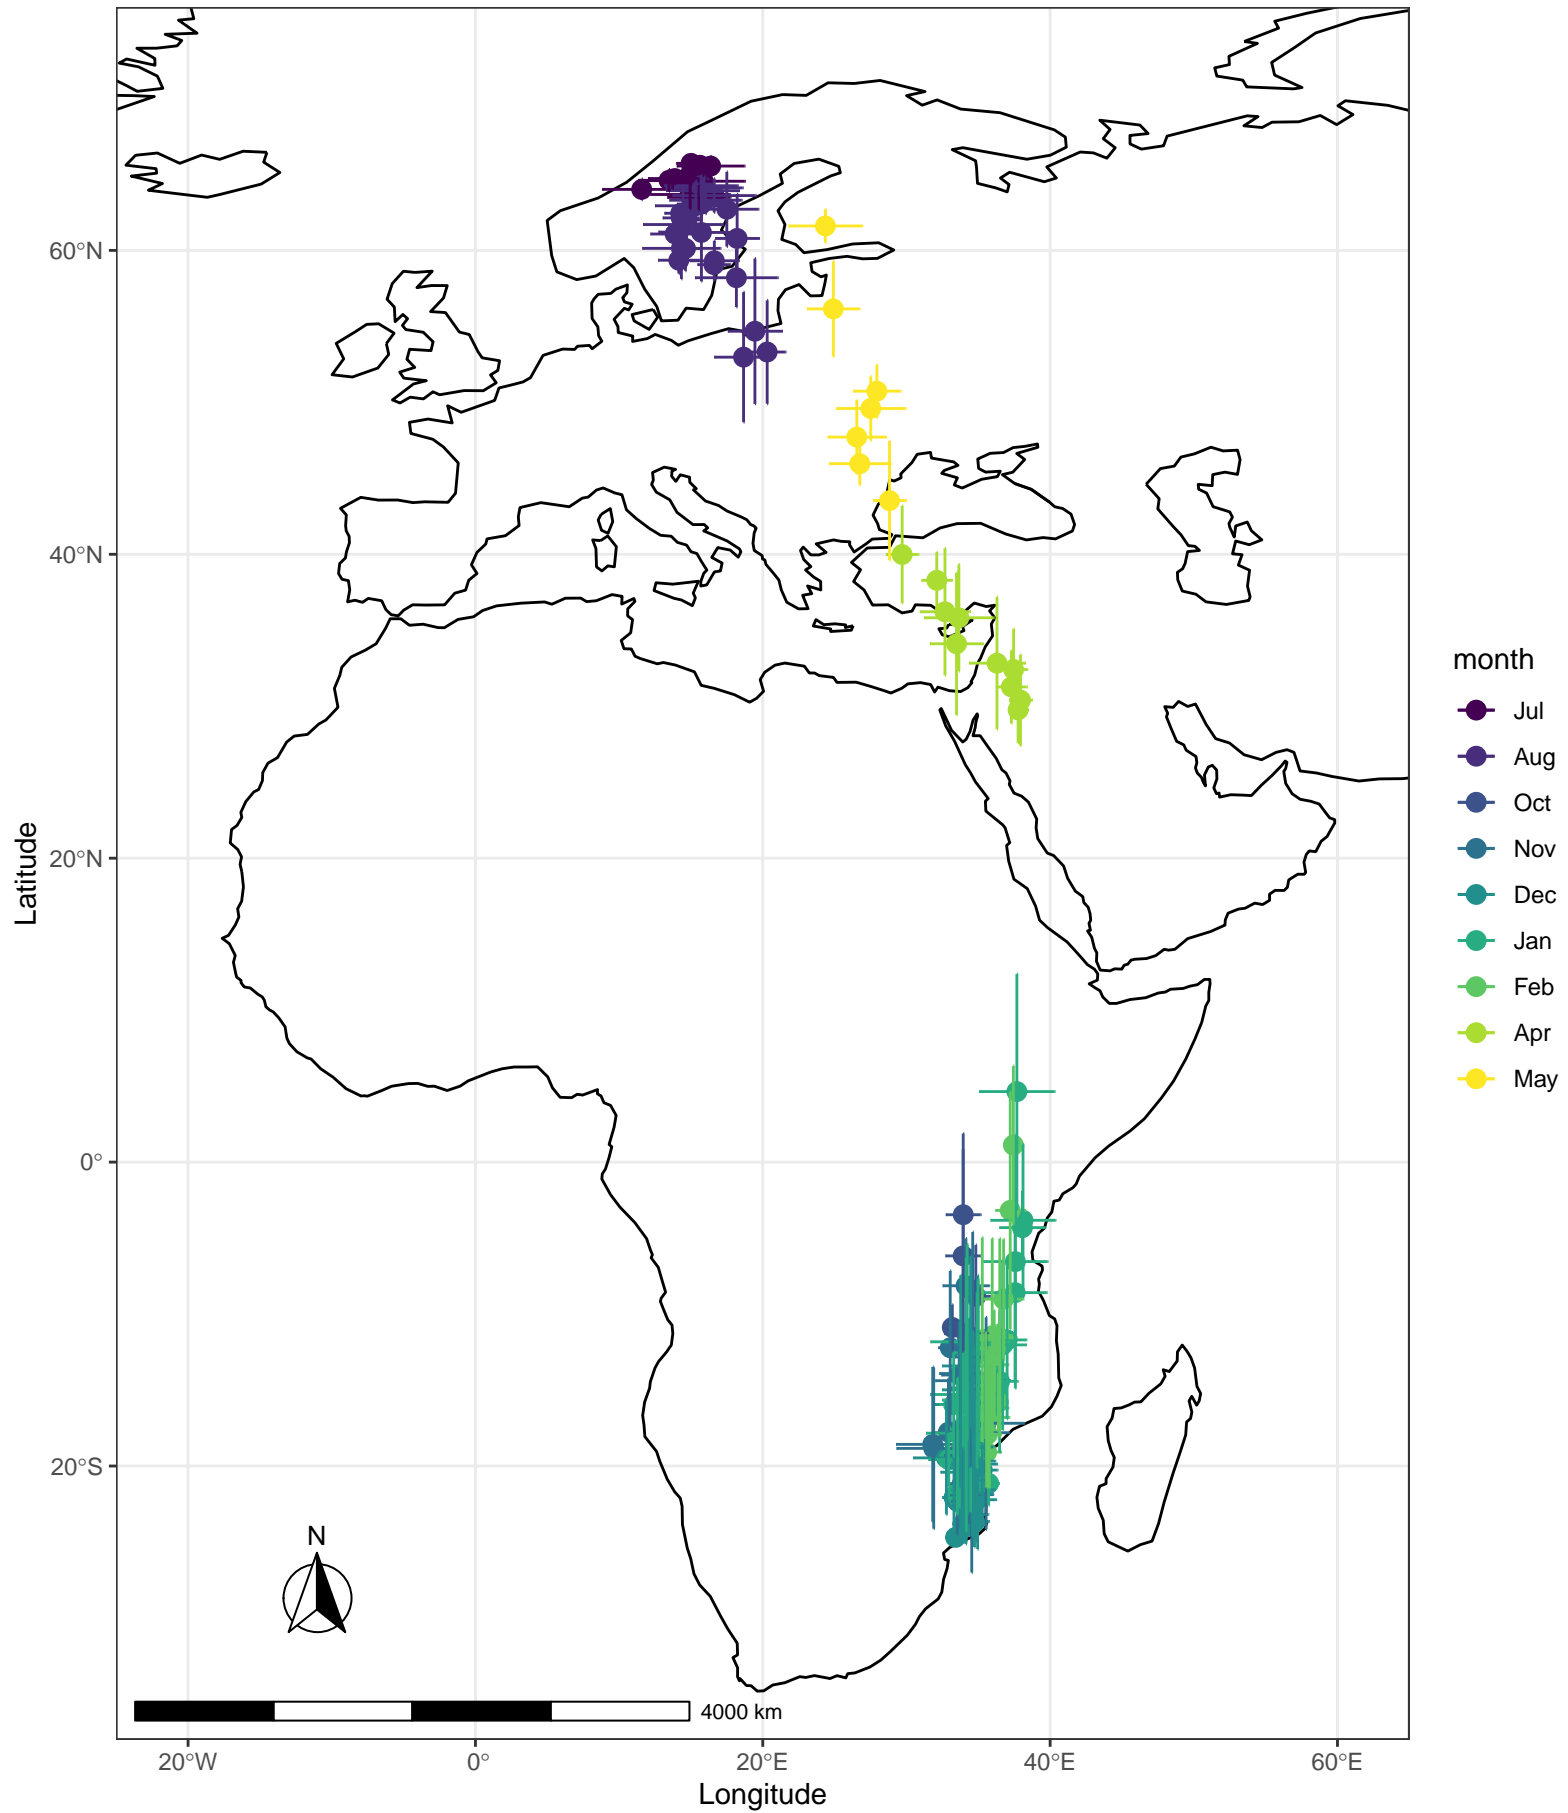

BY798

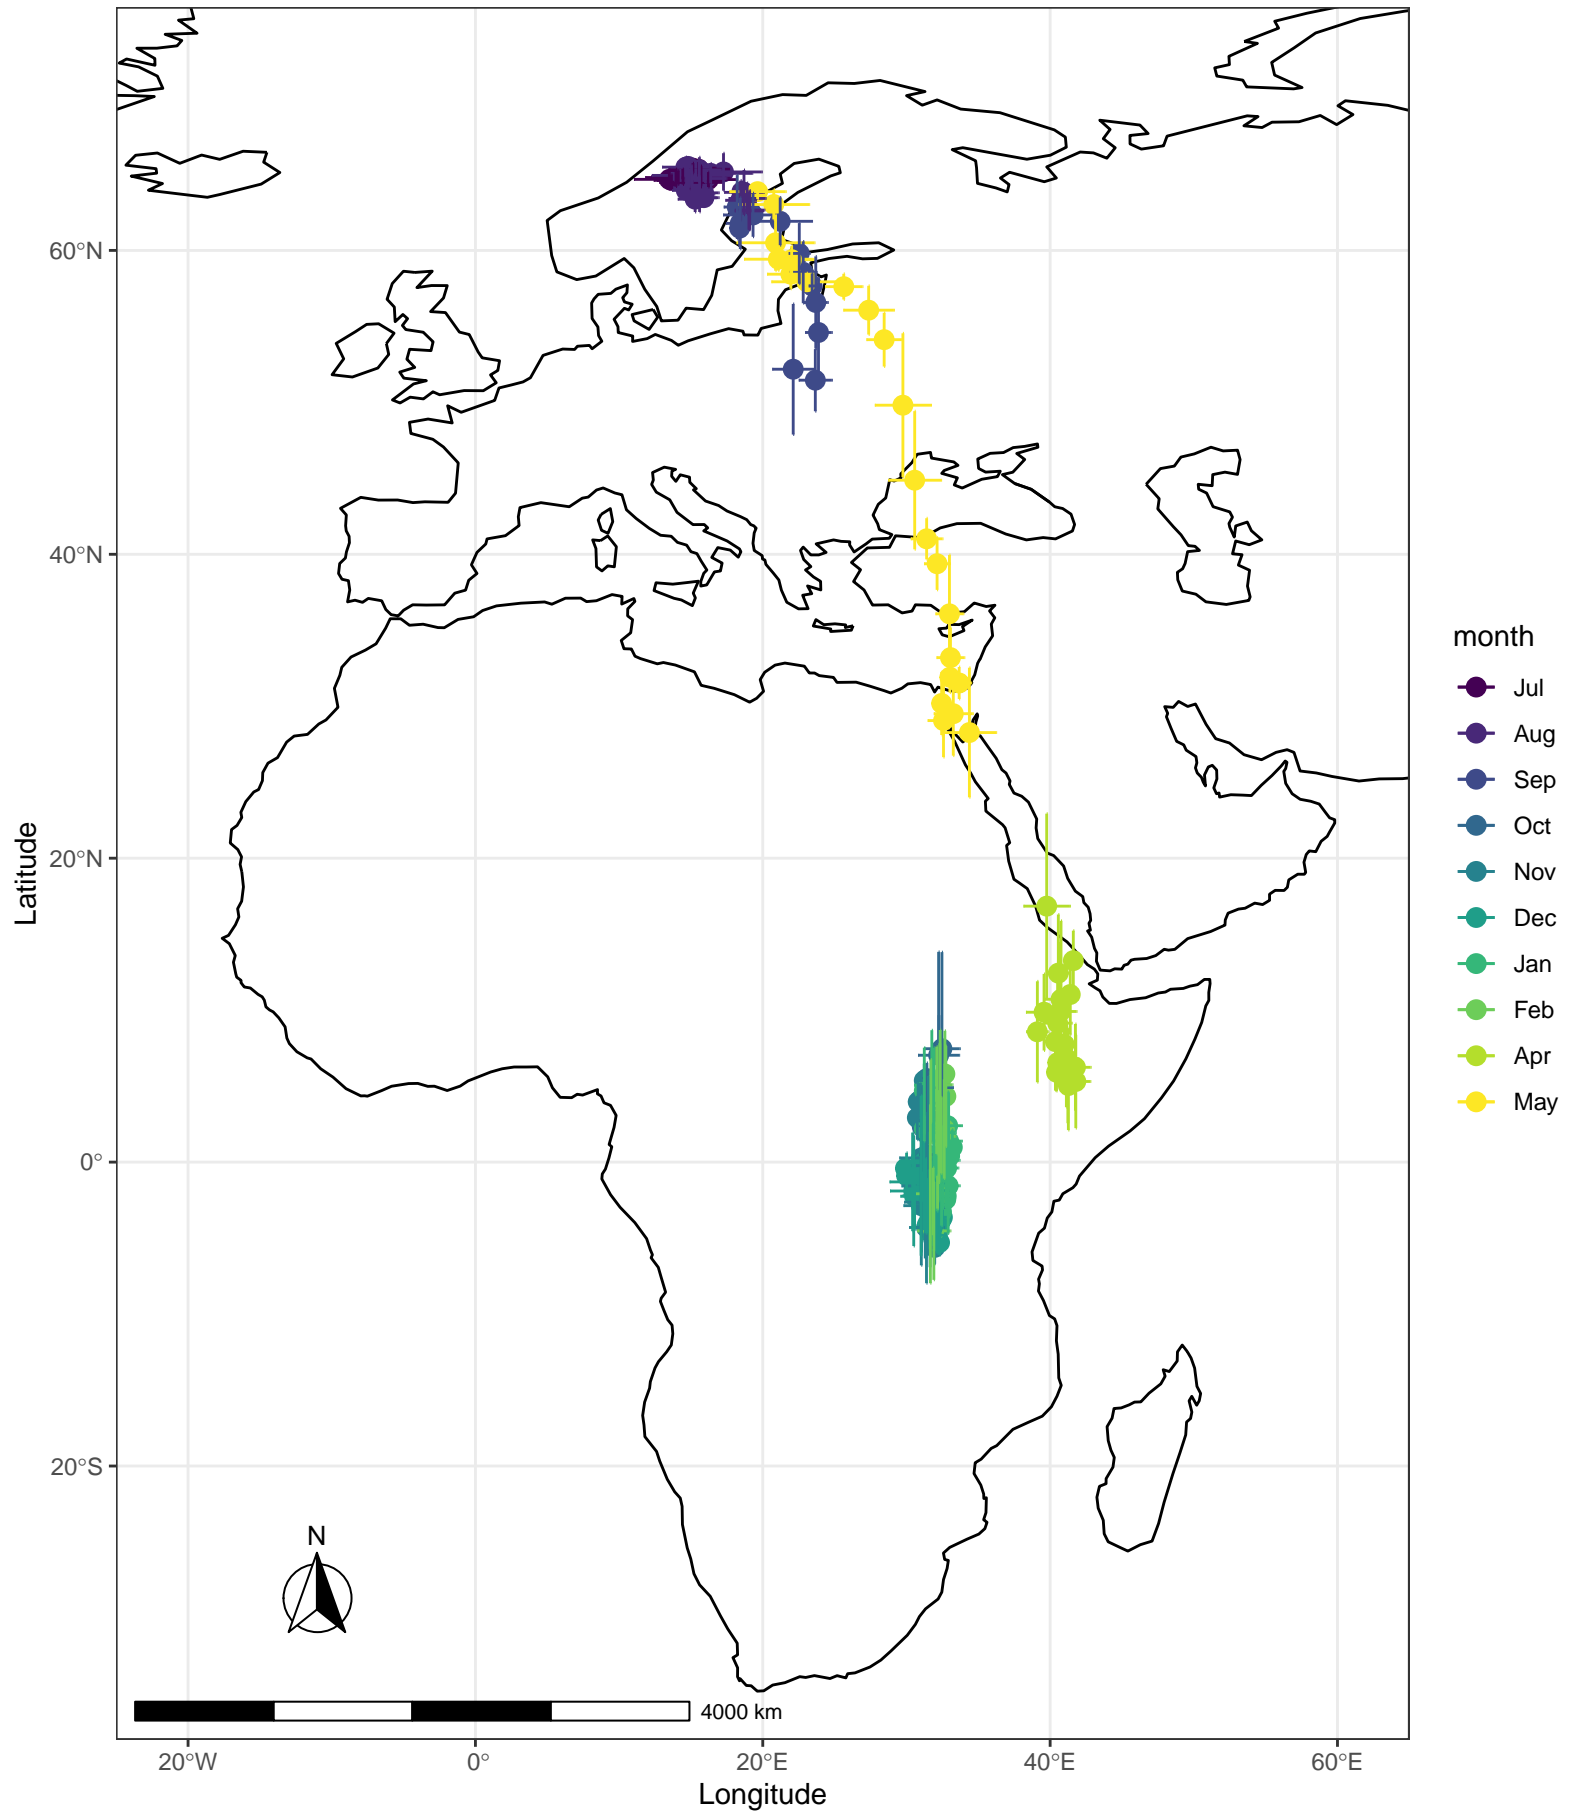

BY810

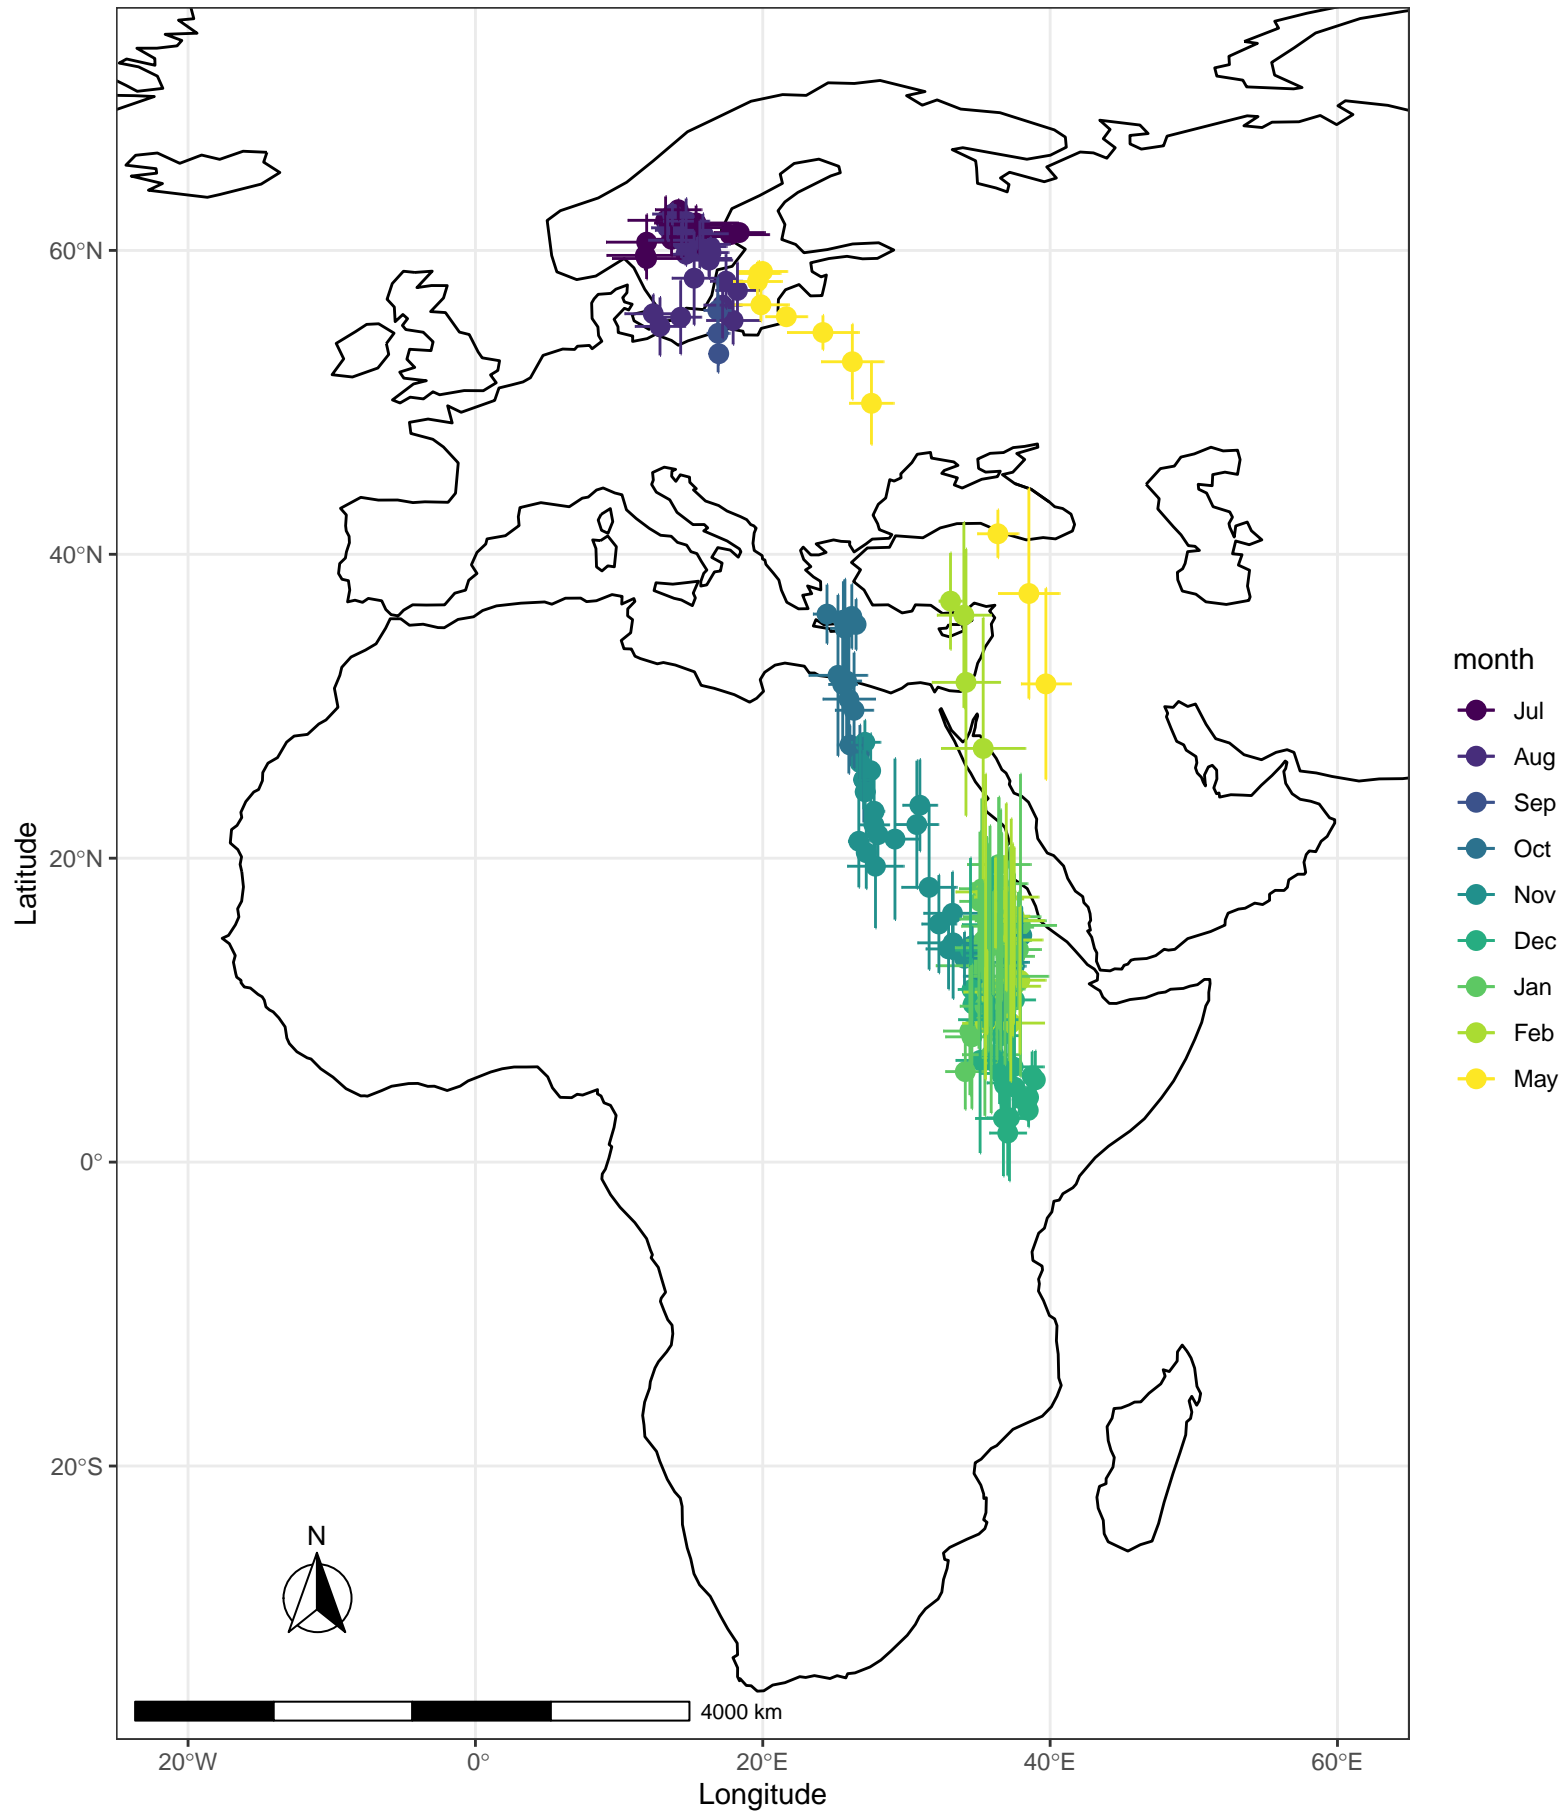

BY811

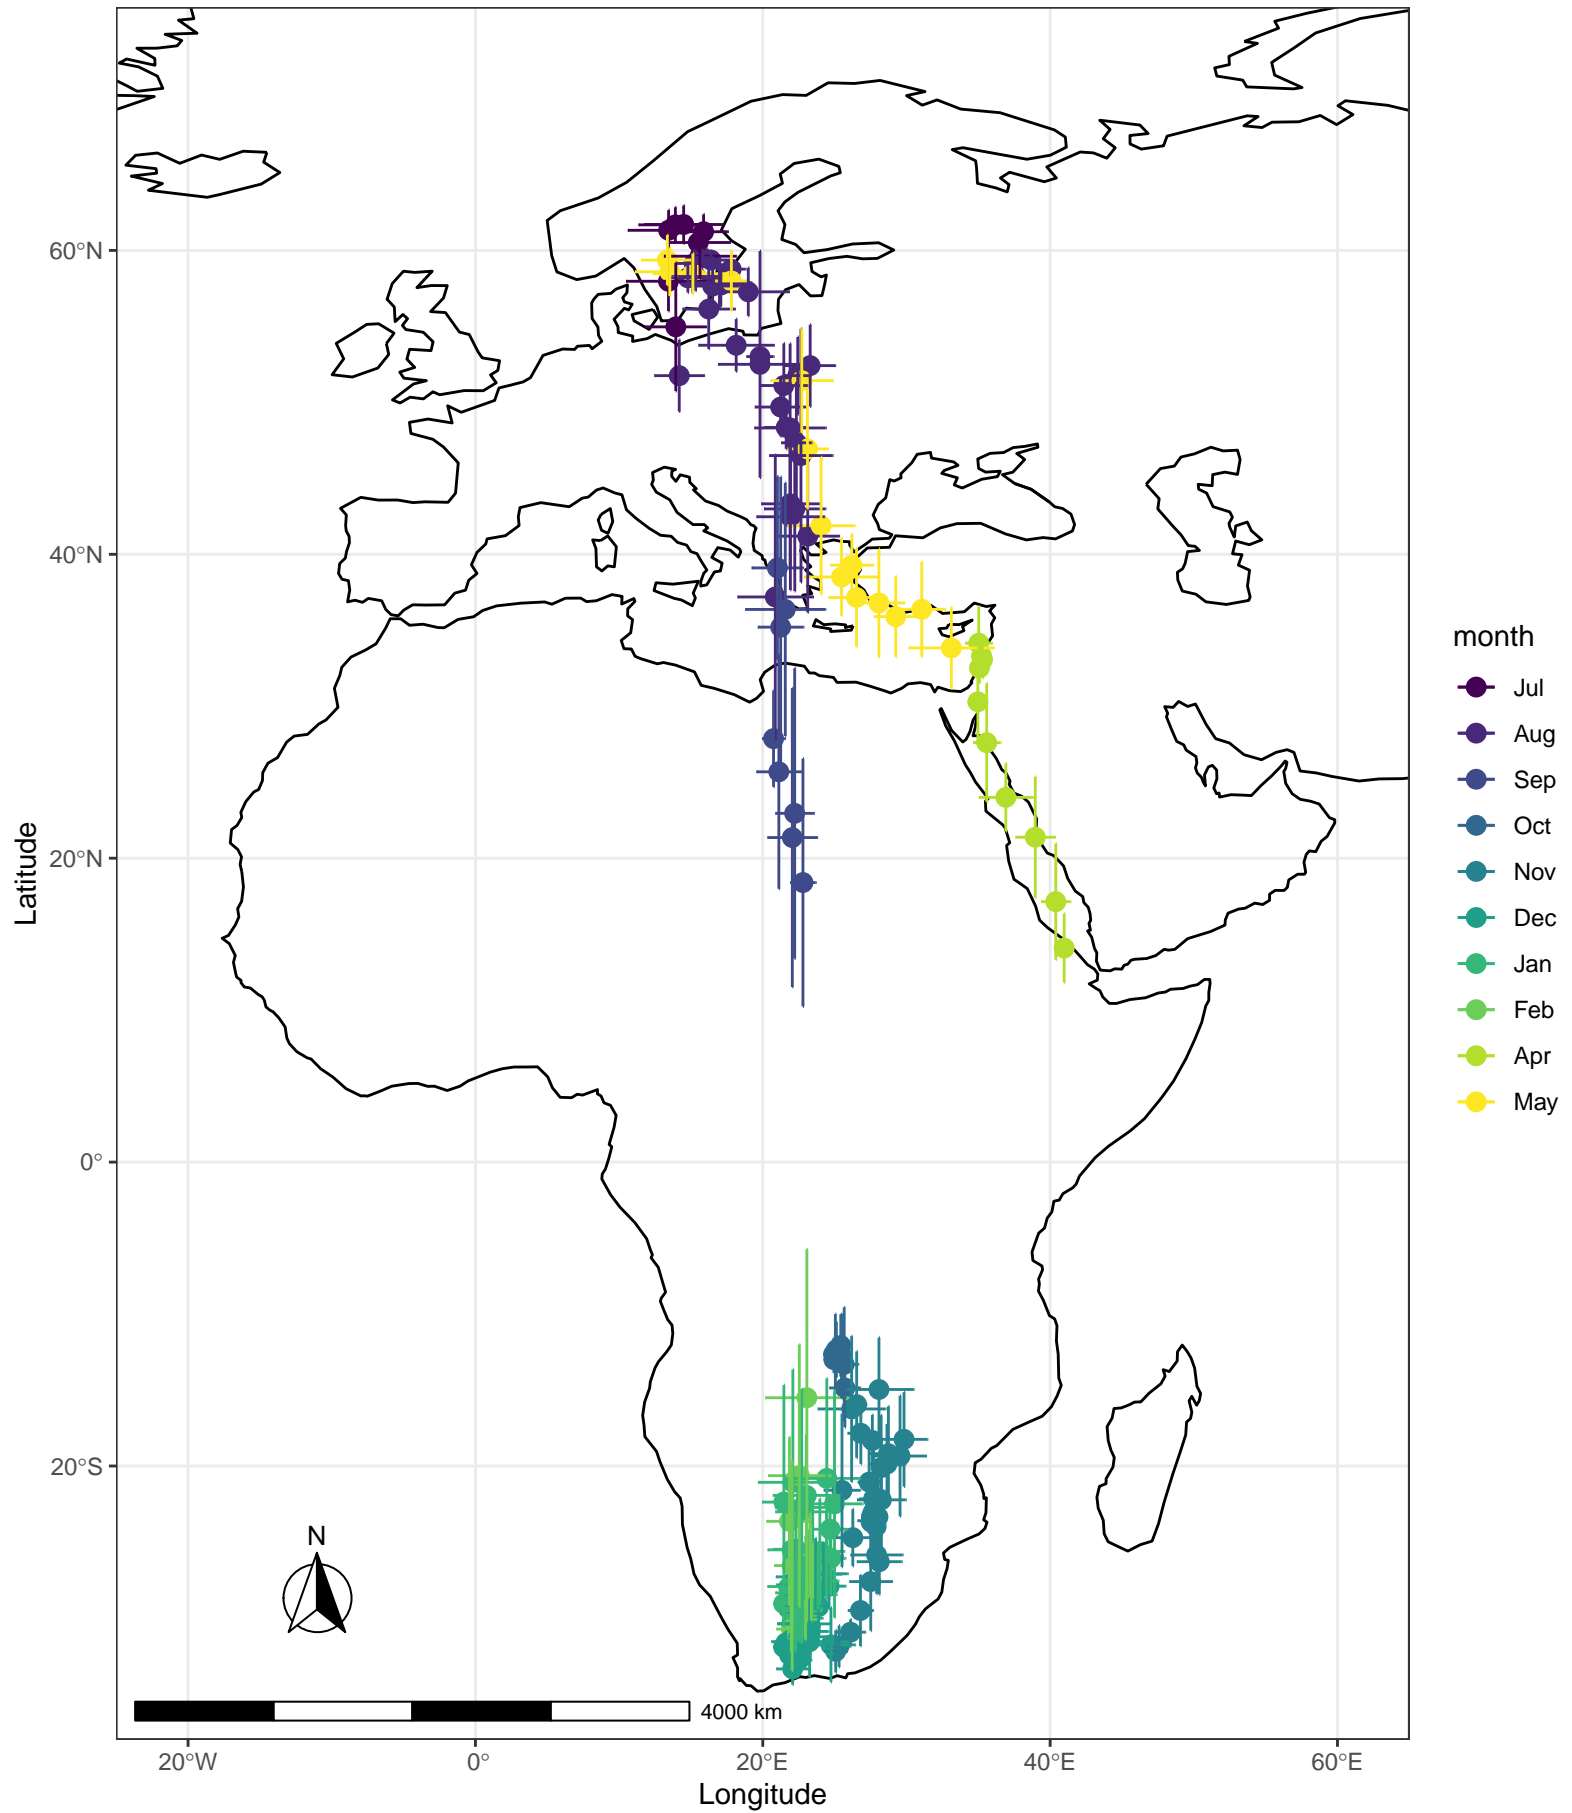

BY809

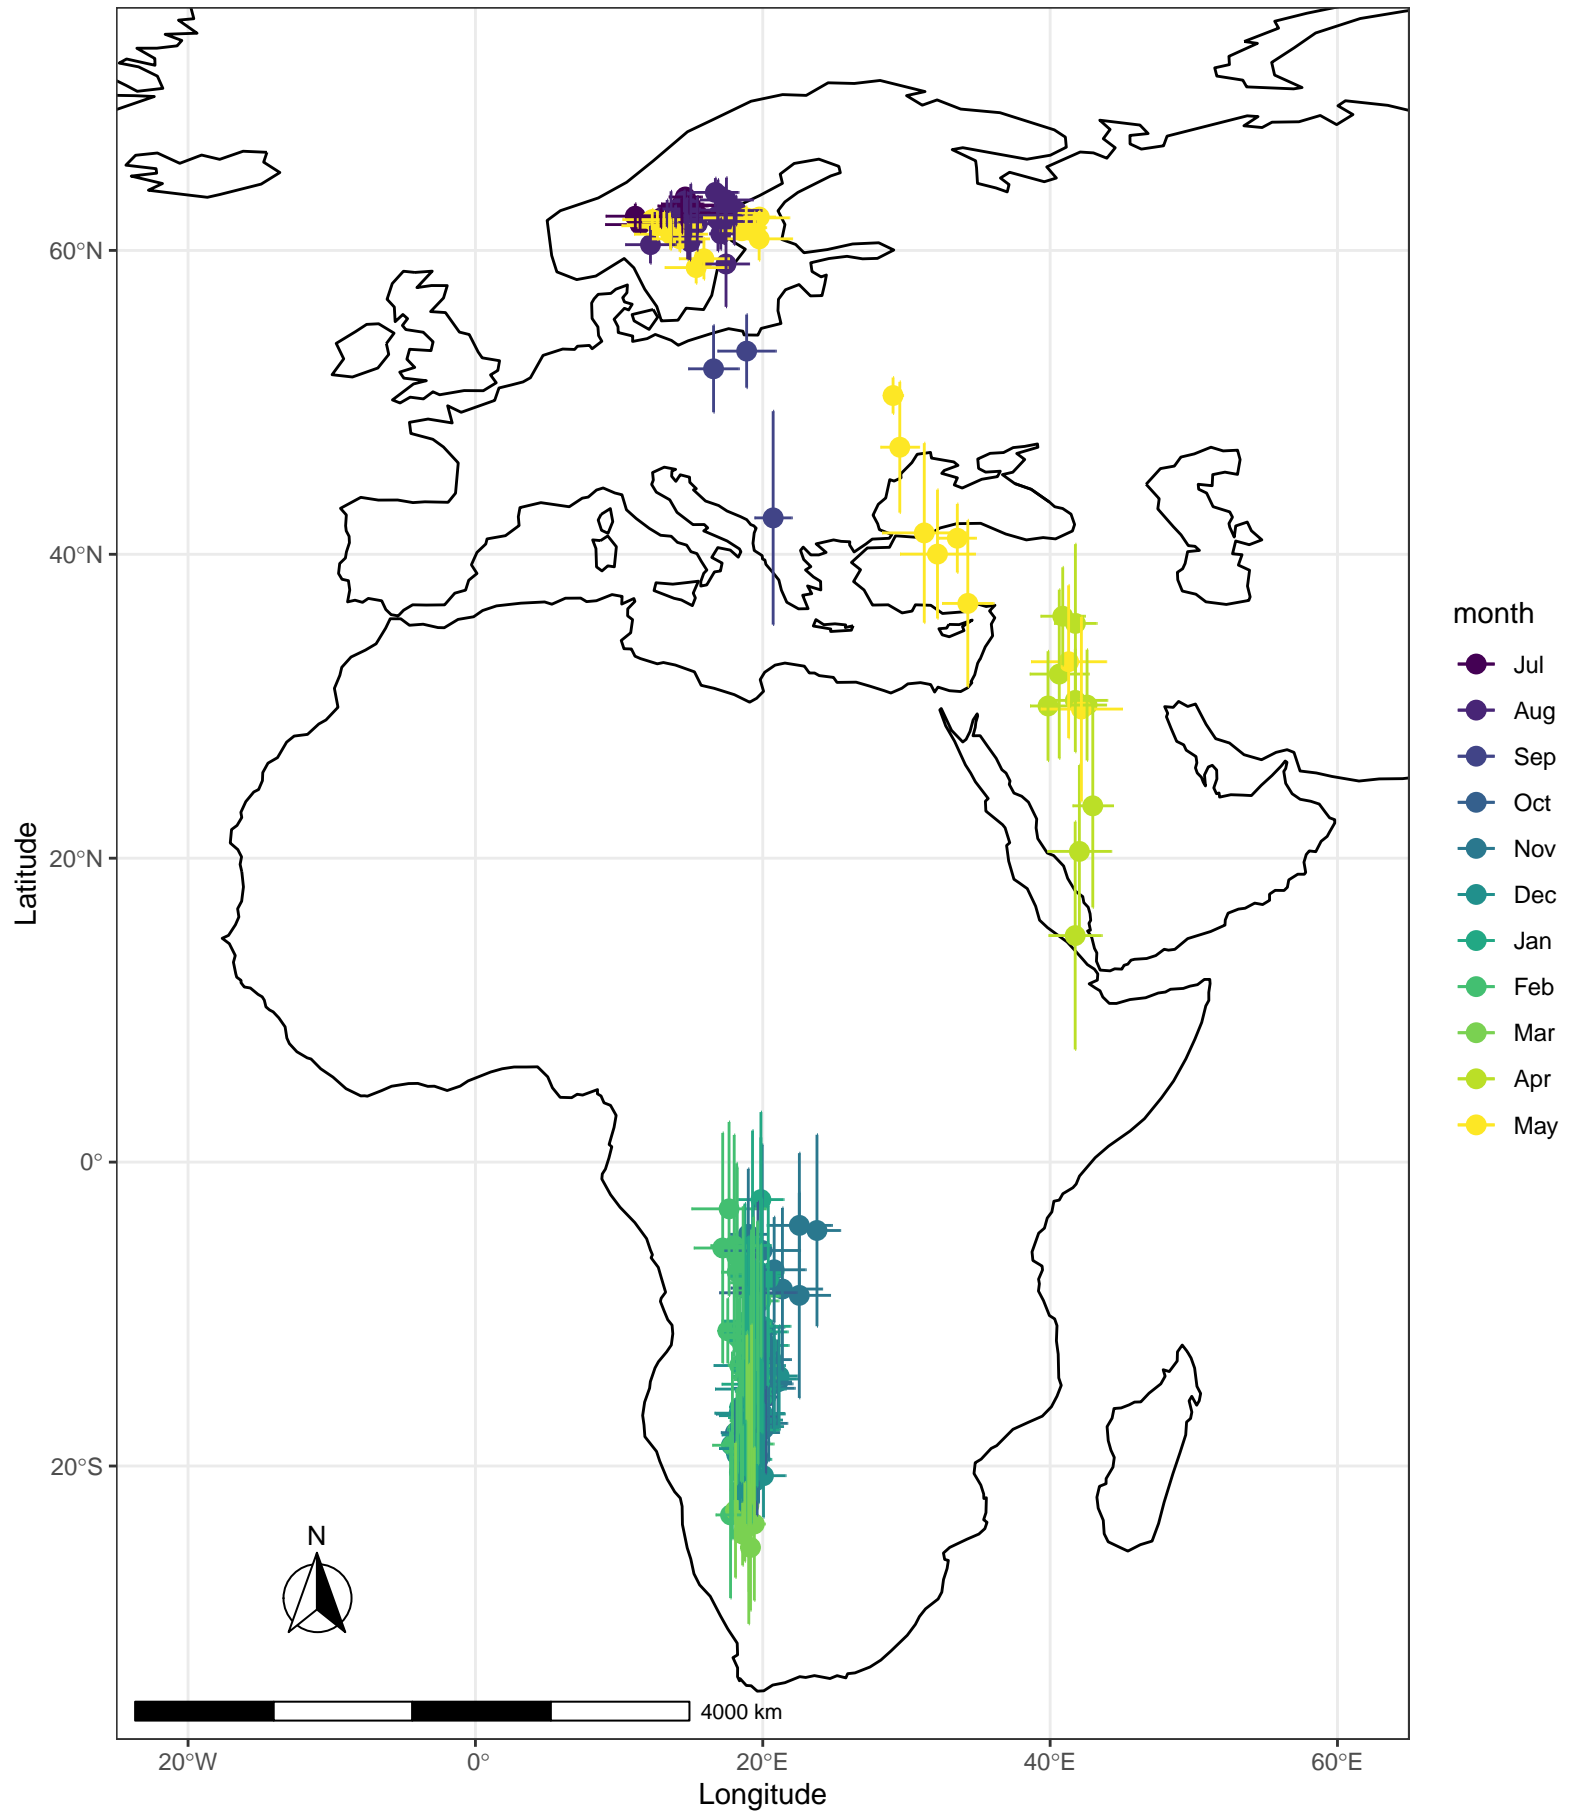

BY759

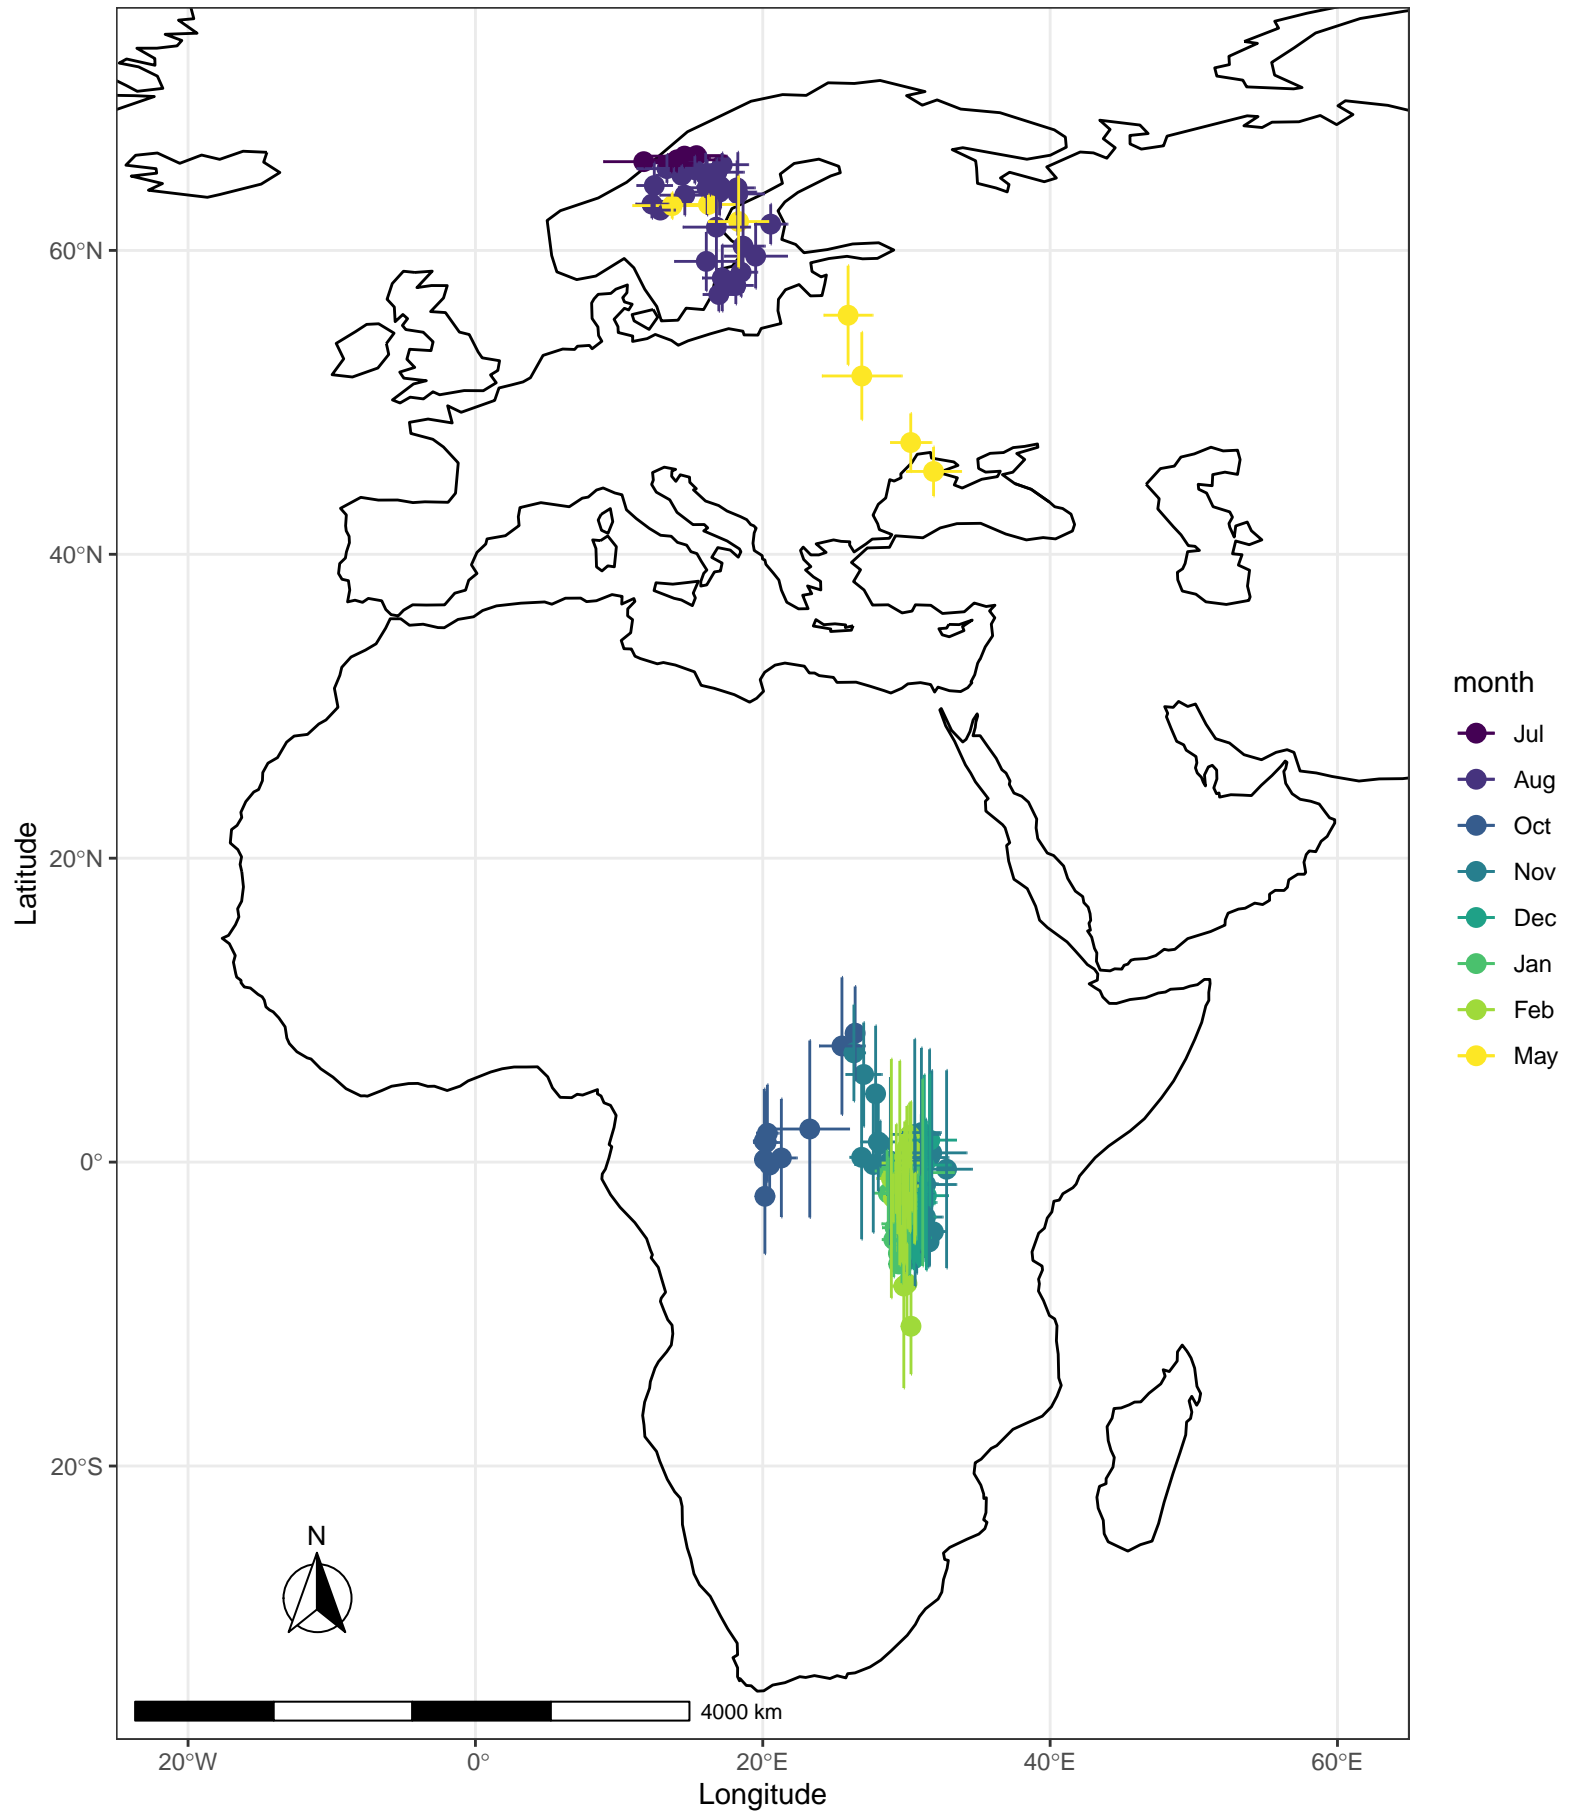



BY802

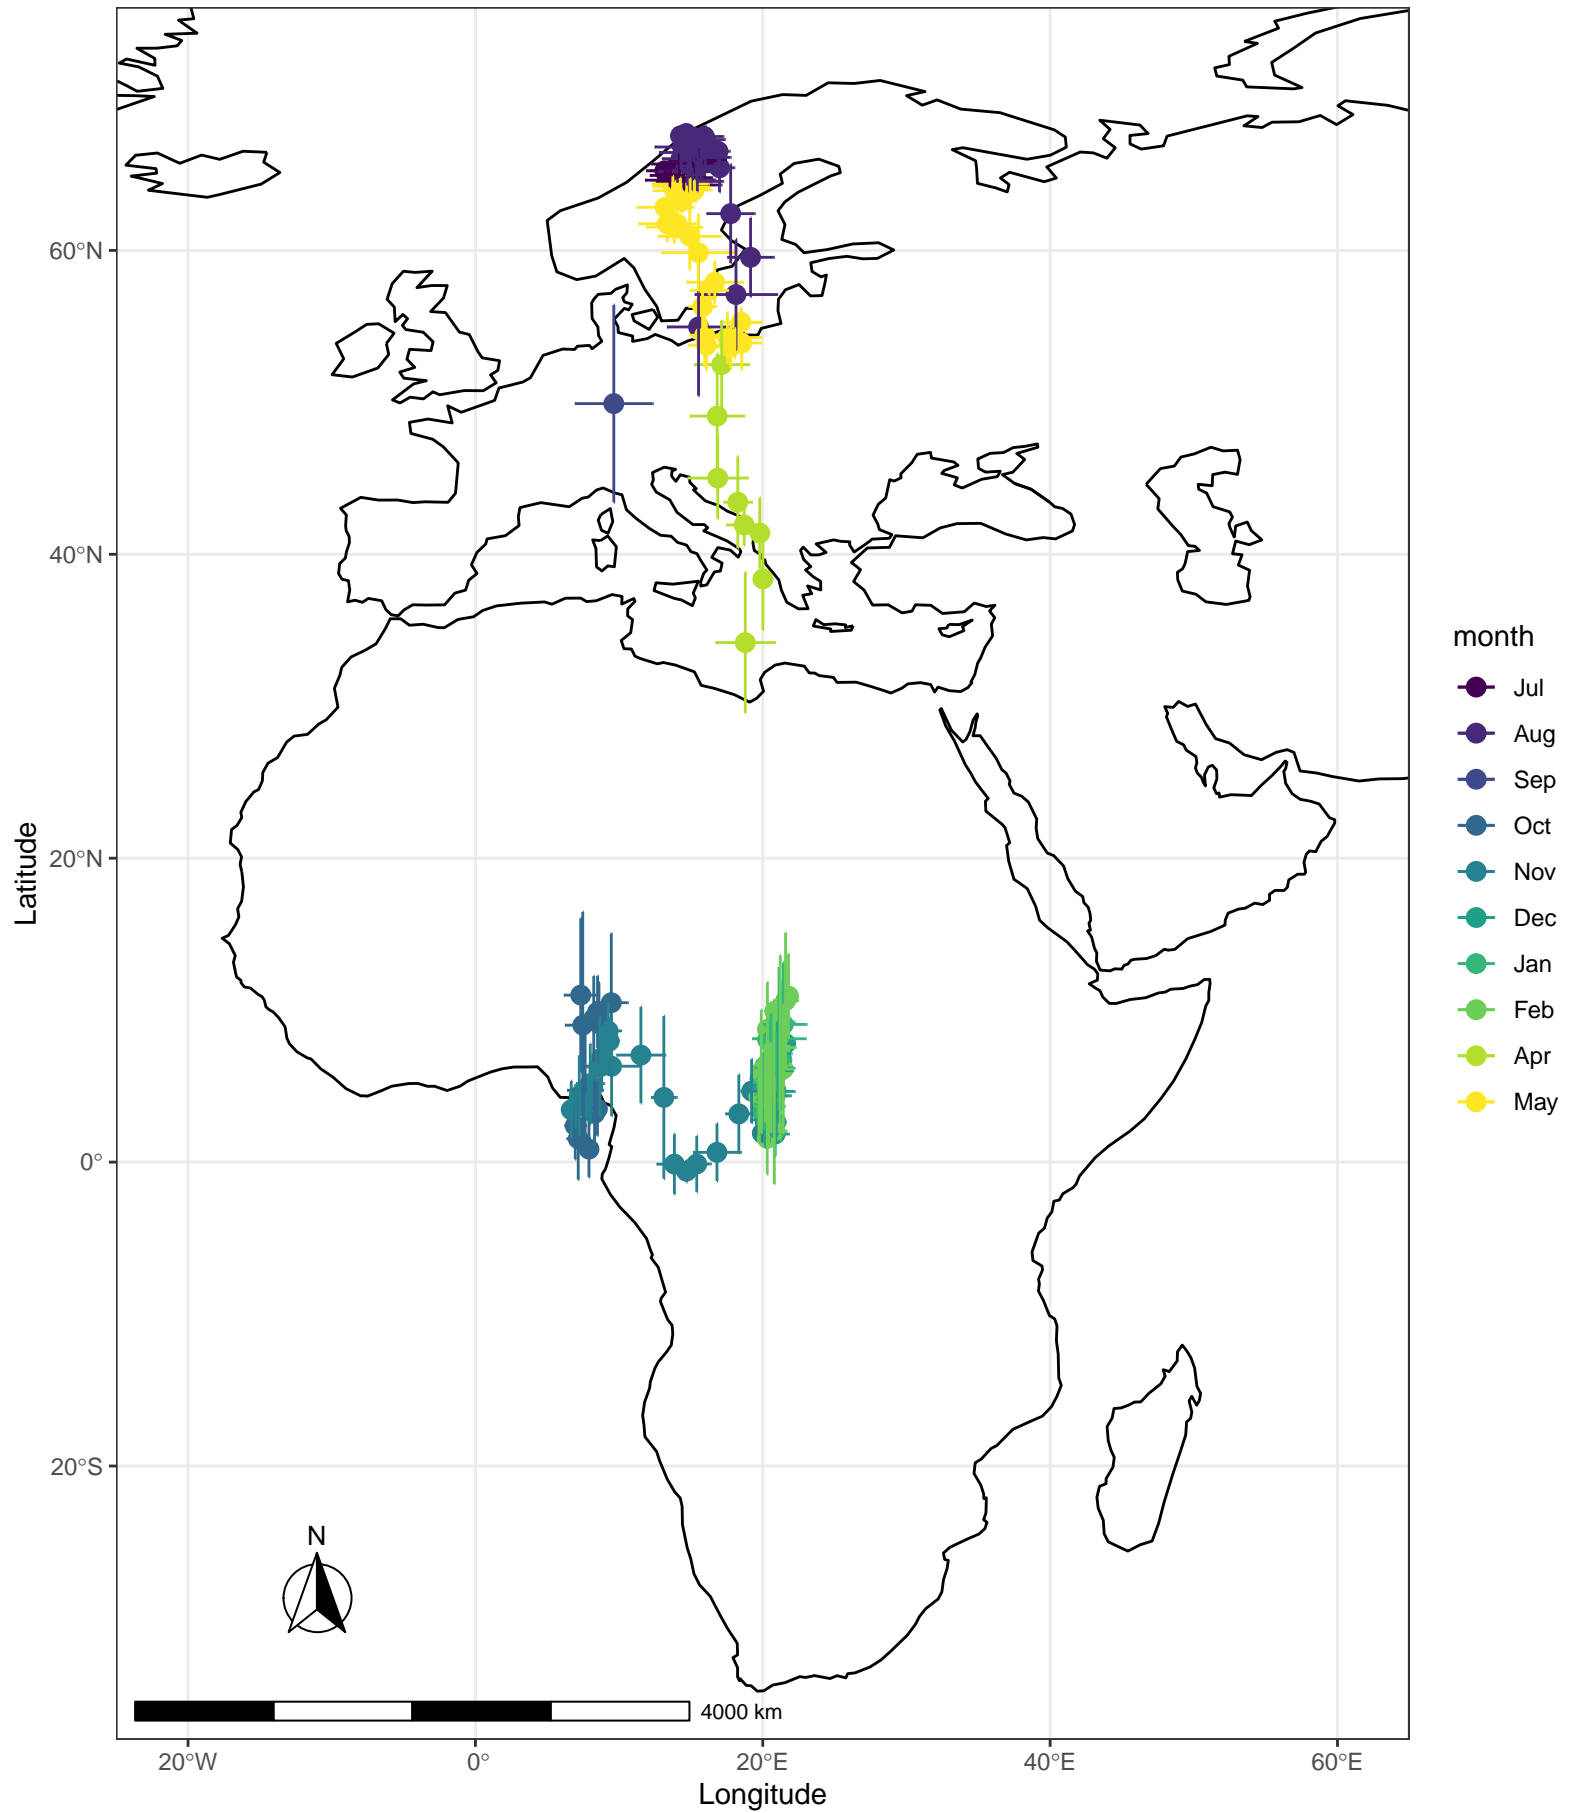

BY792

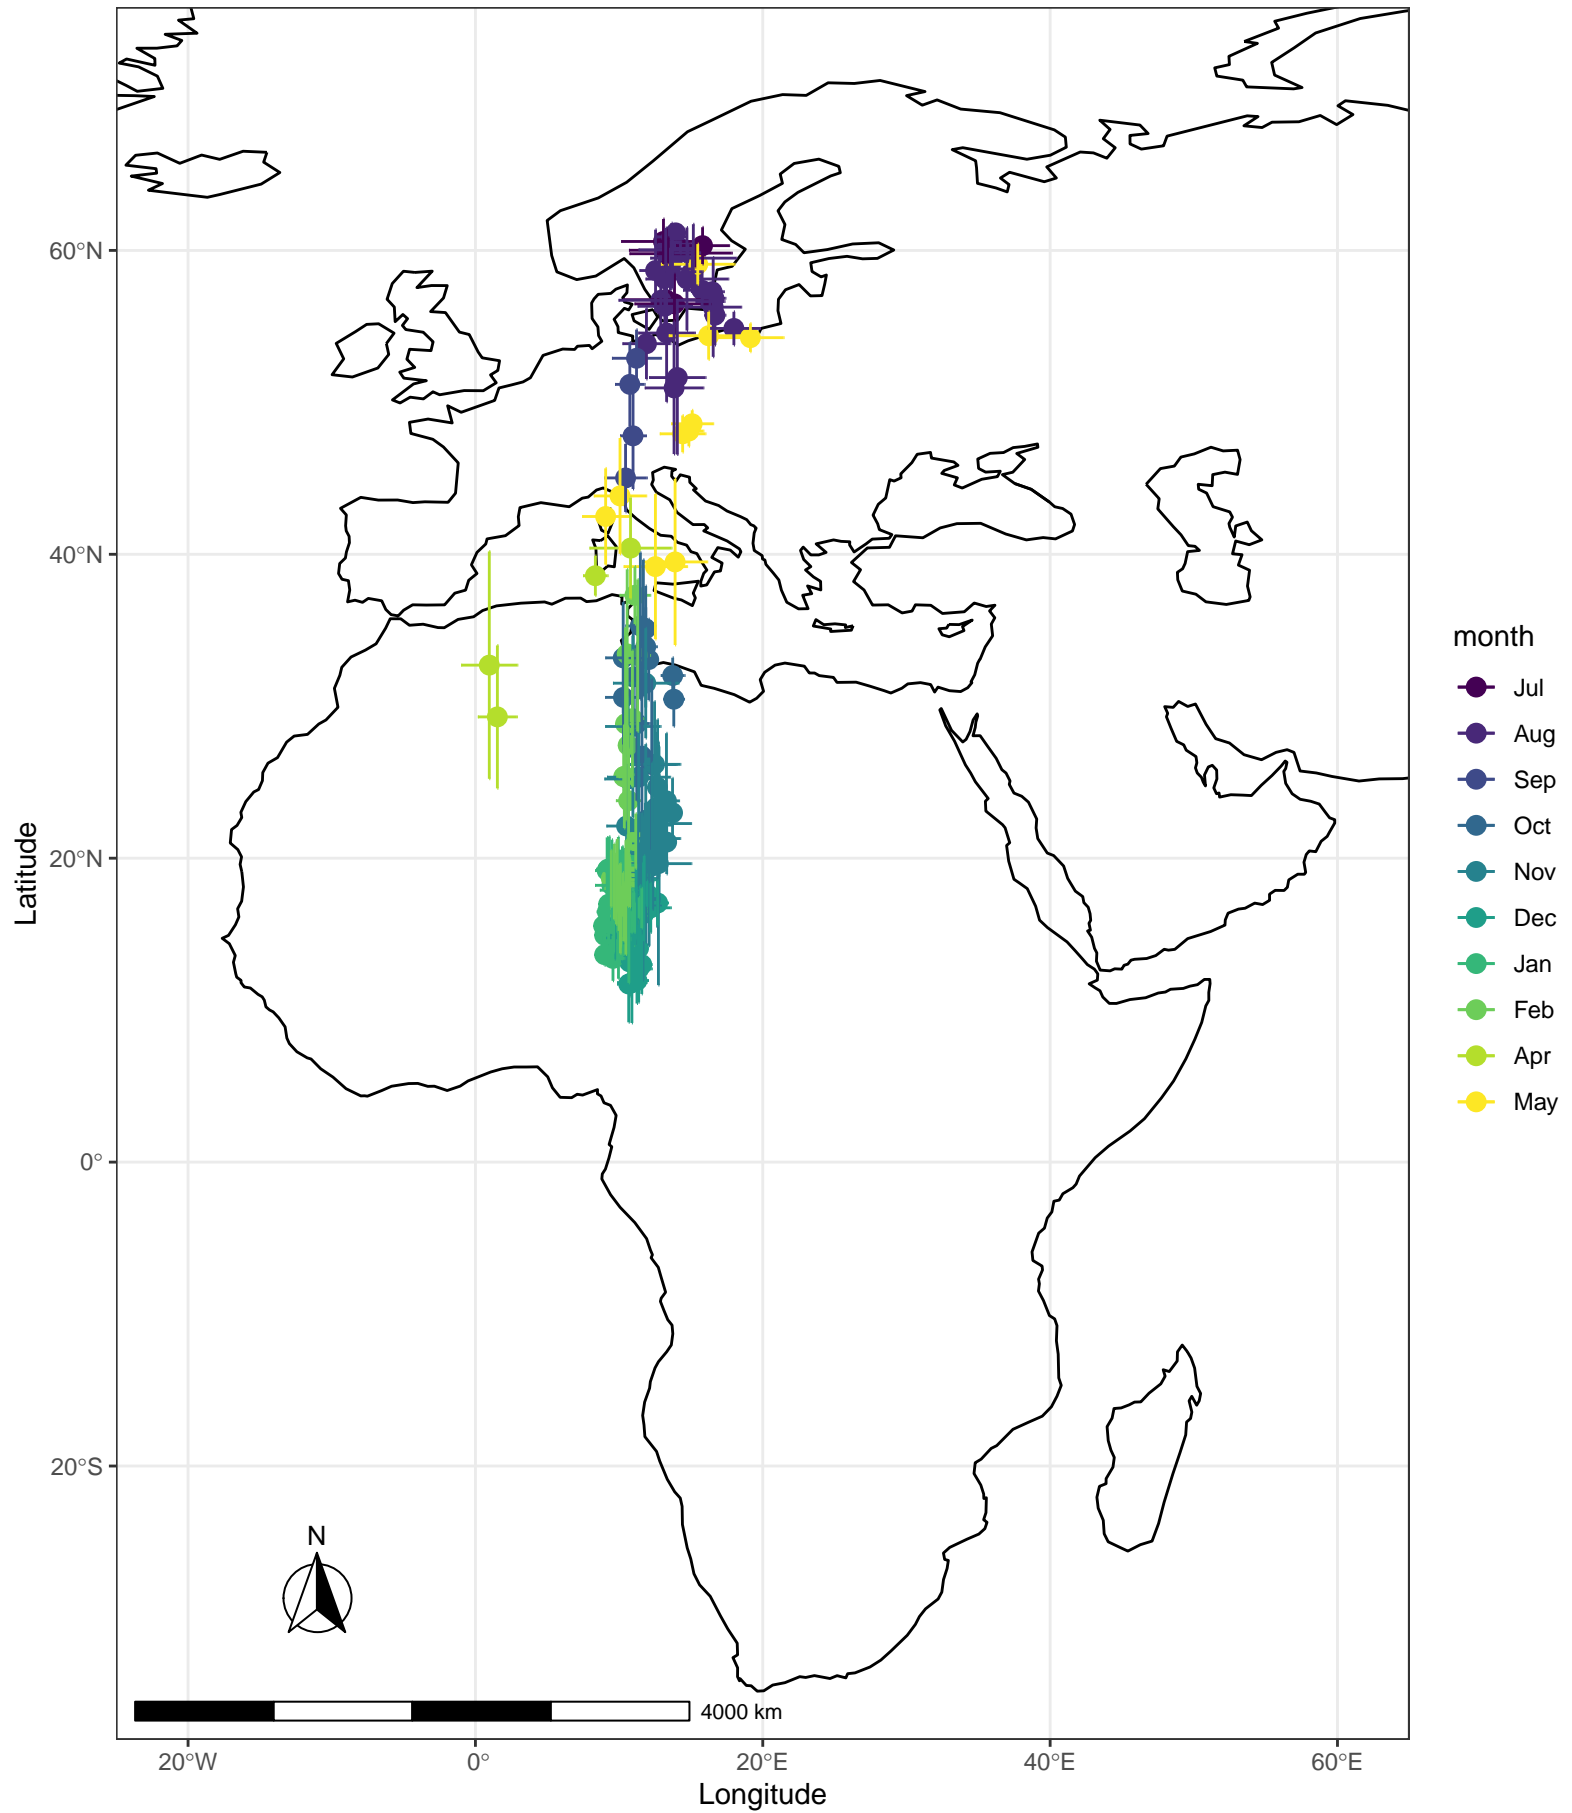

BY799

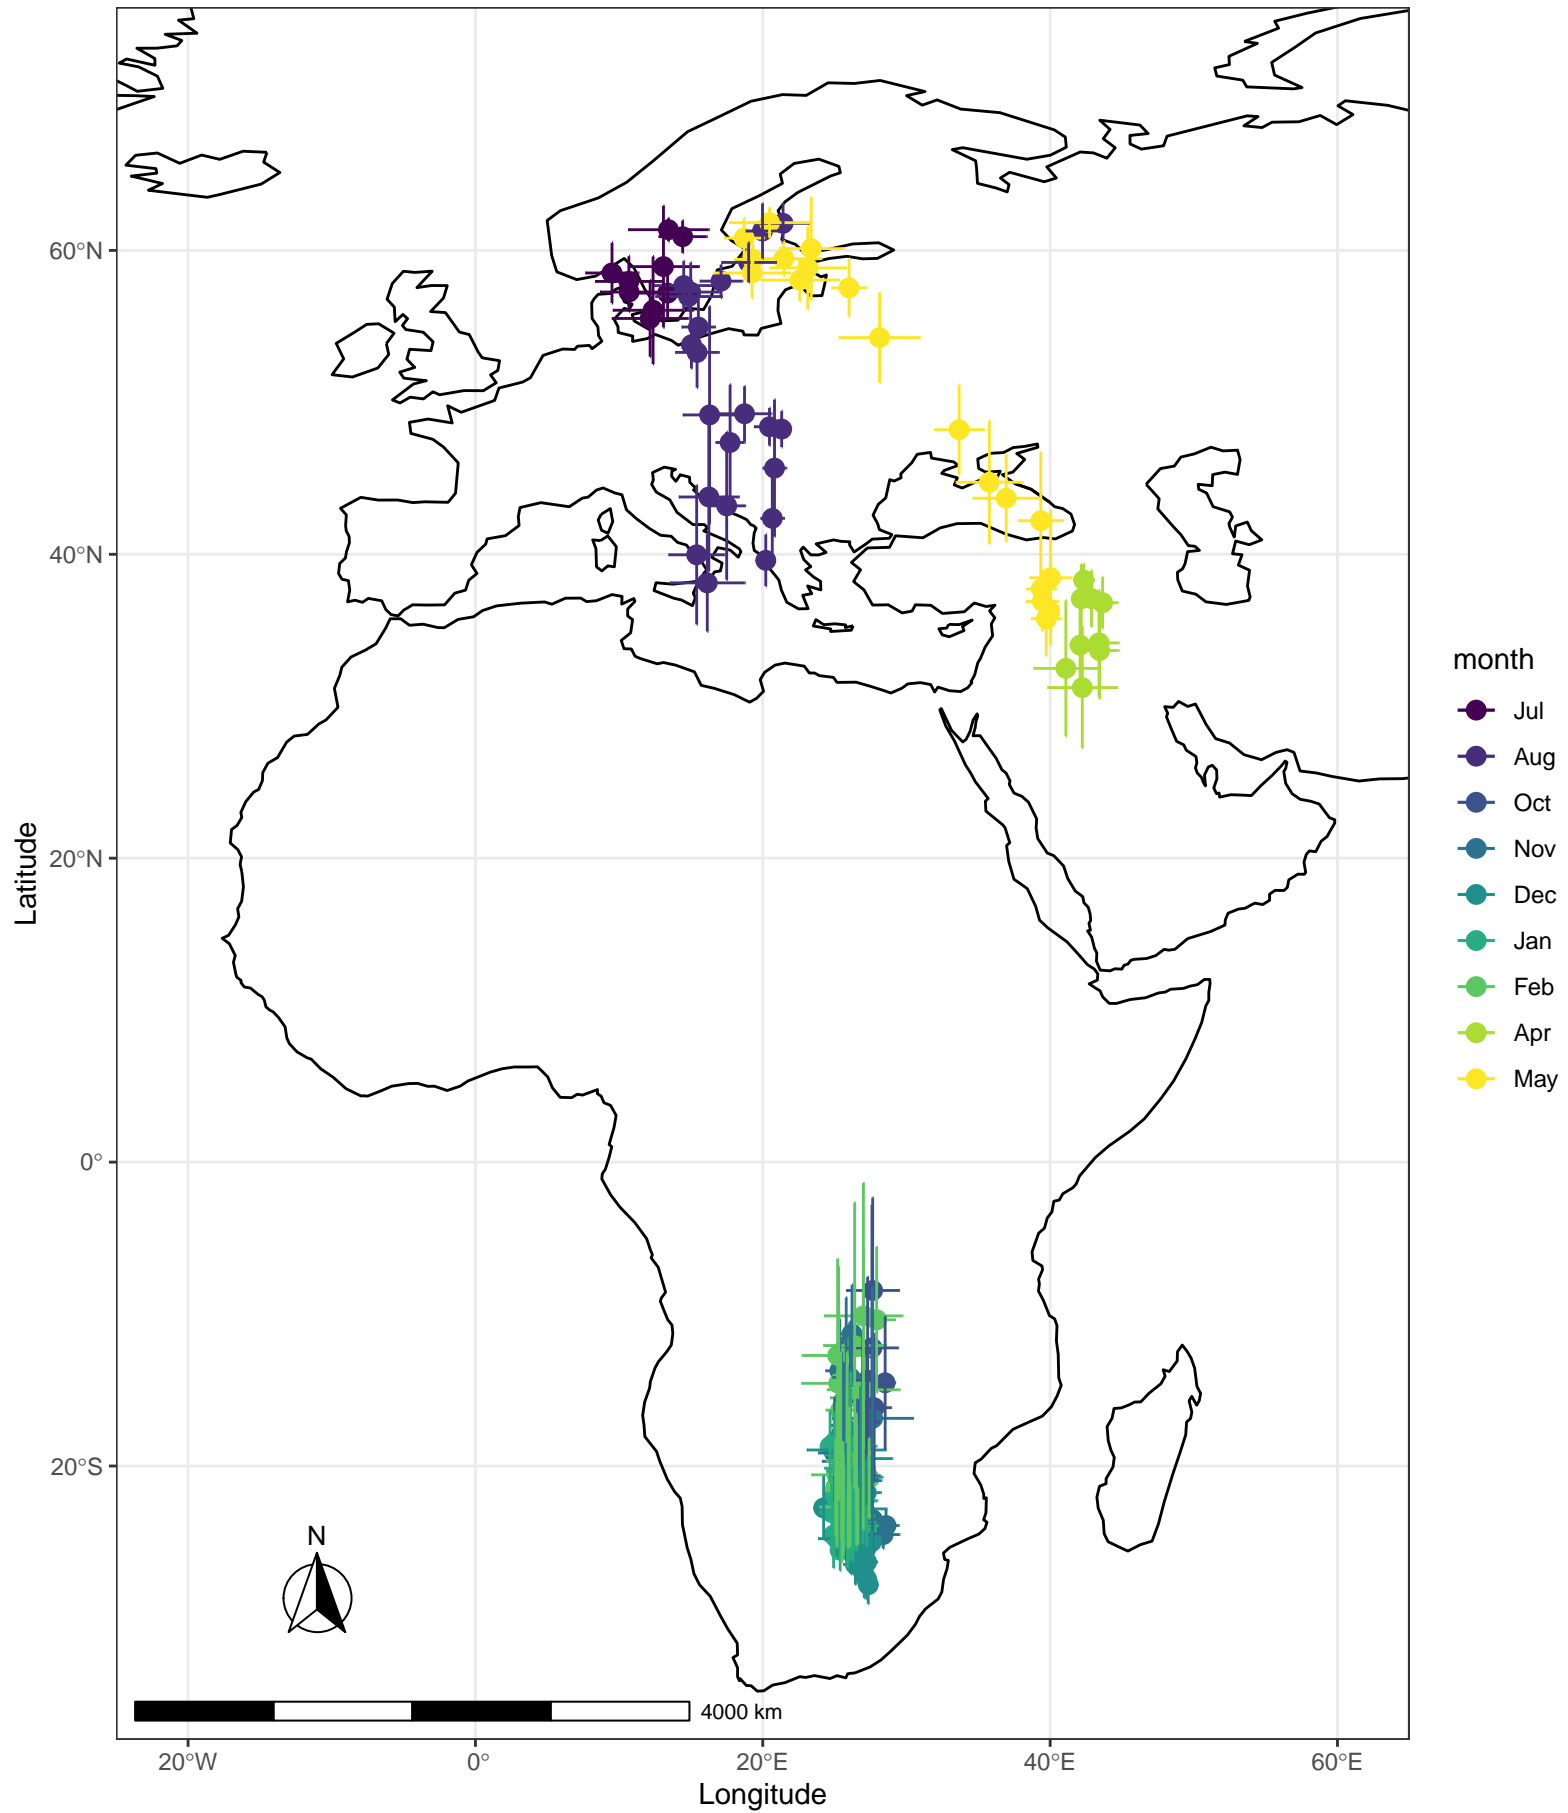

BY800

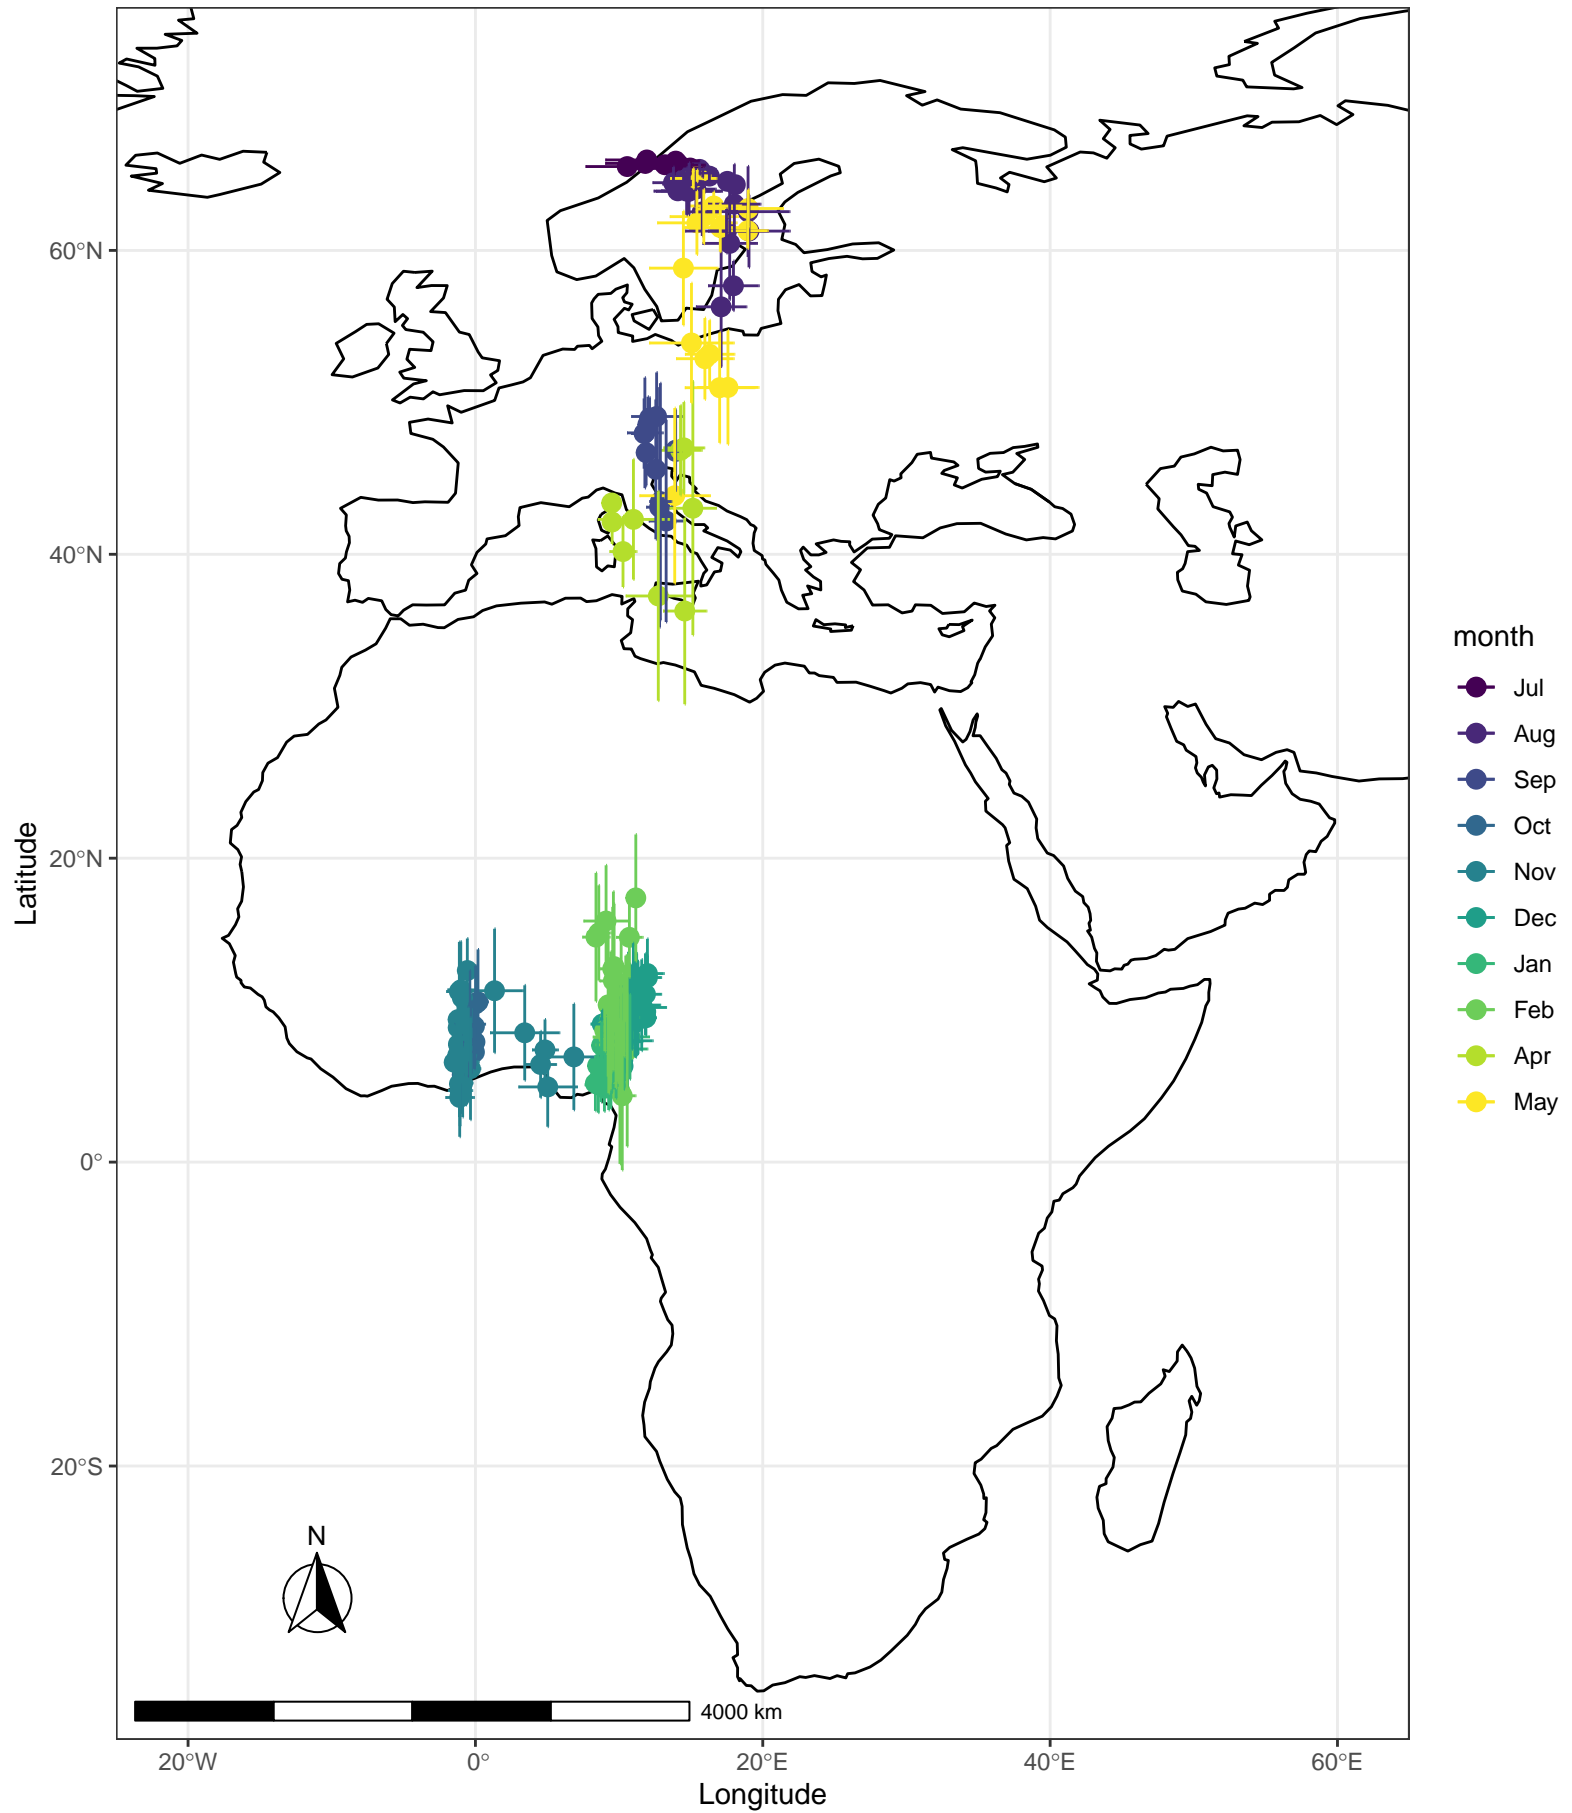

BY773

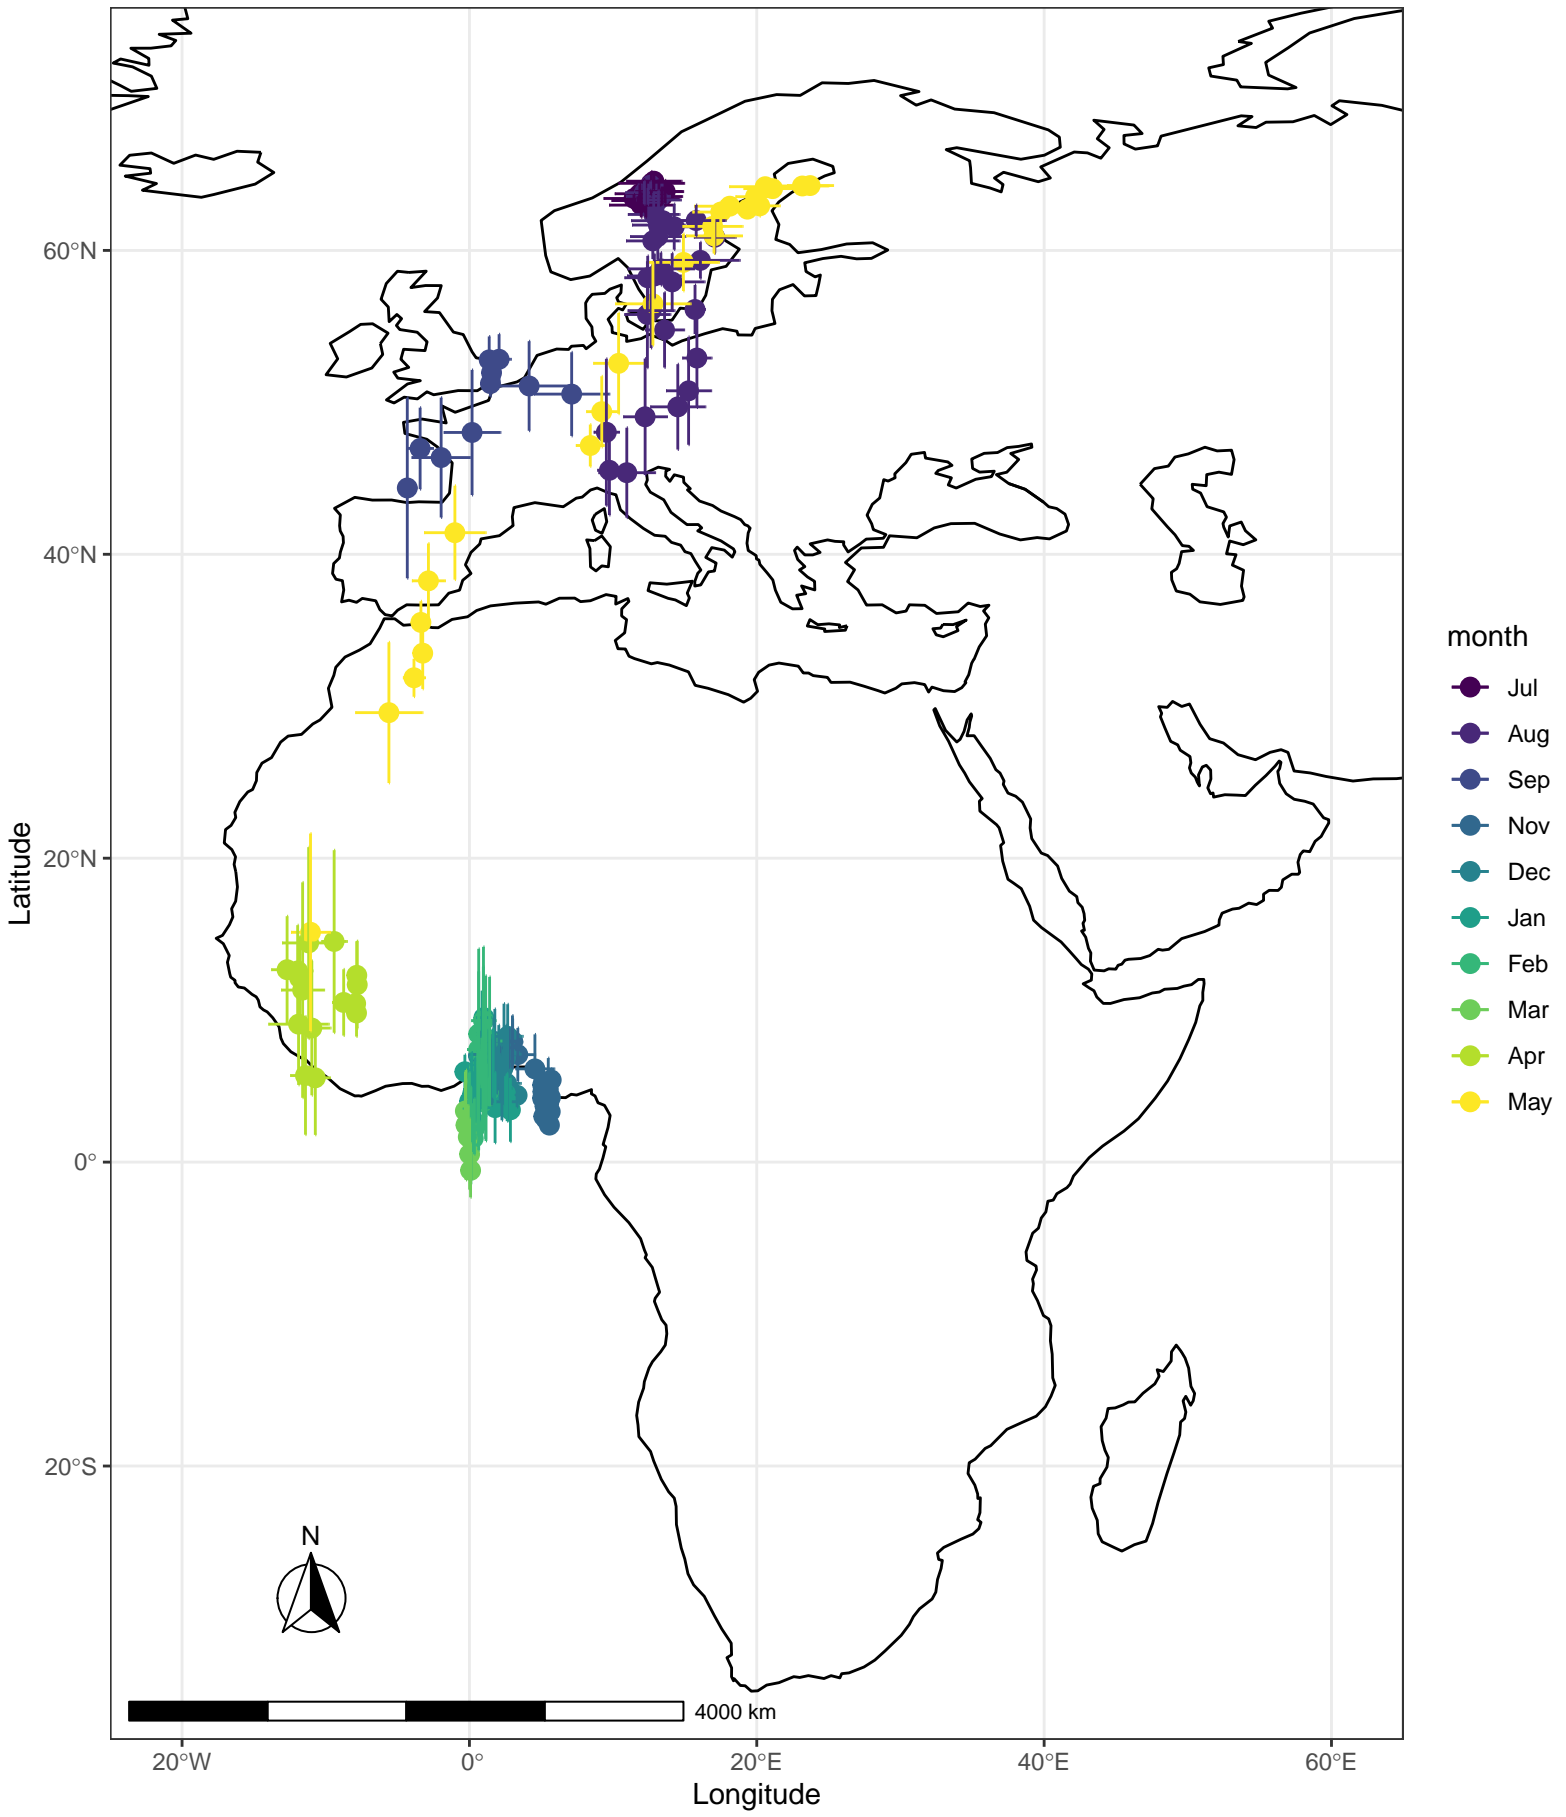

BY783

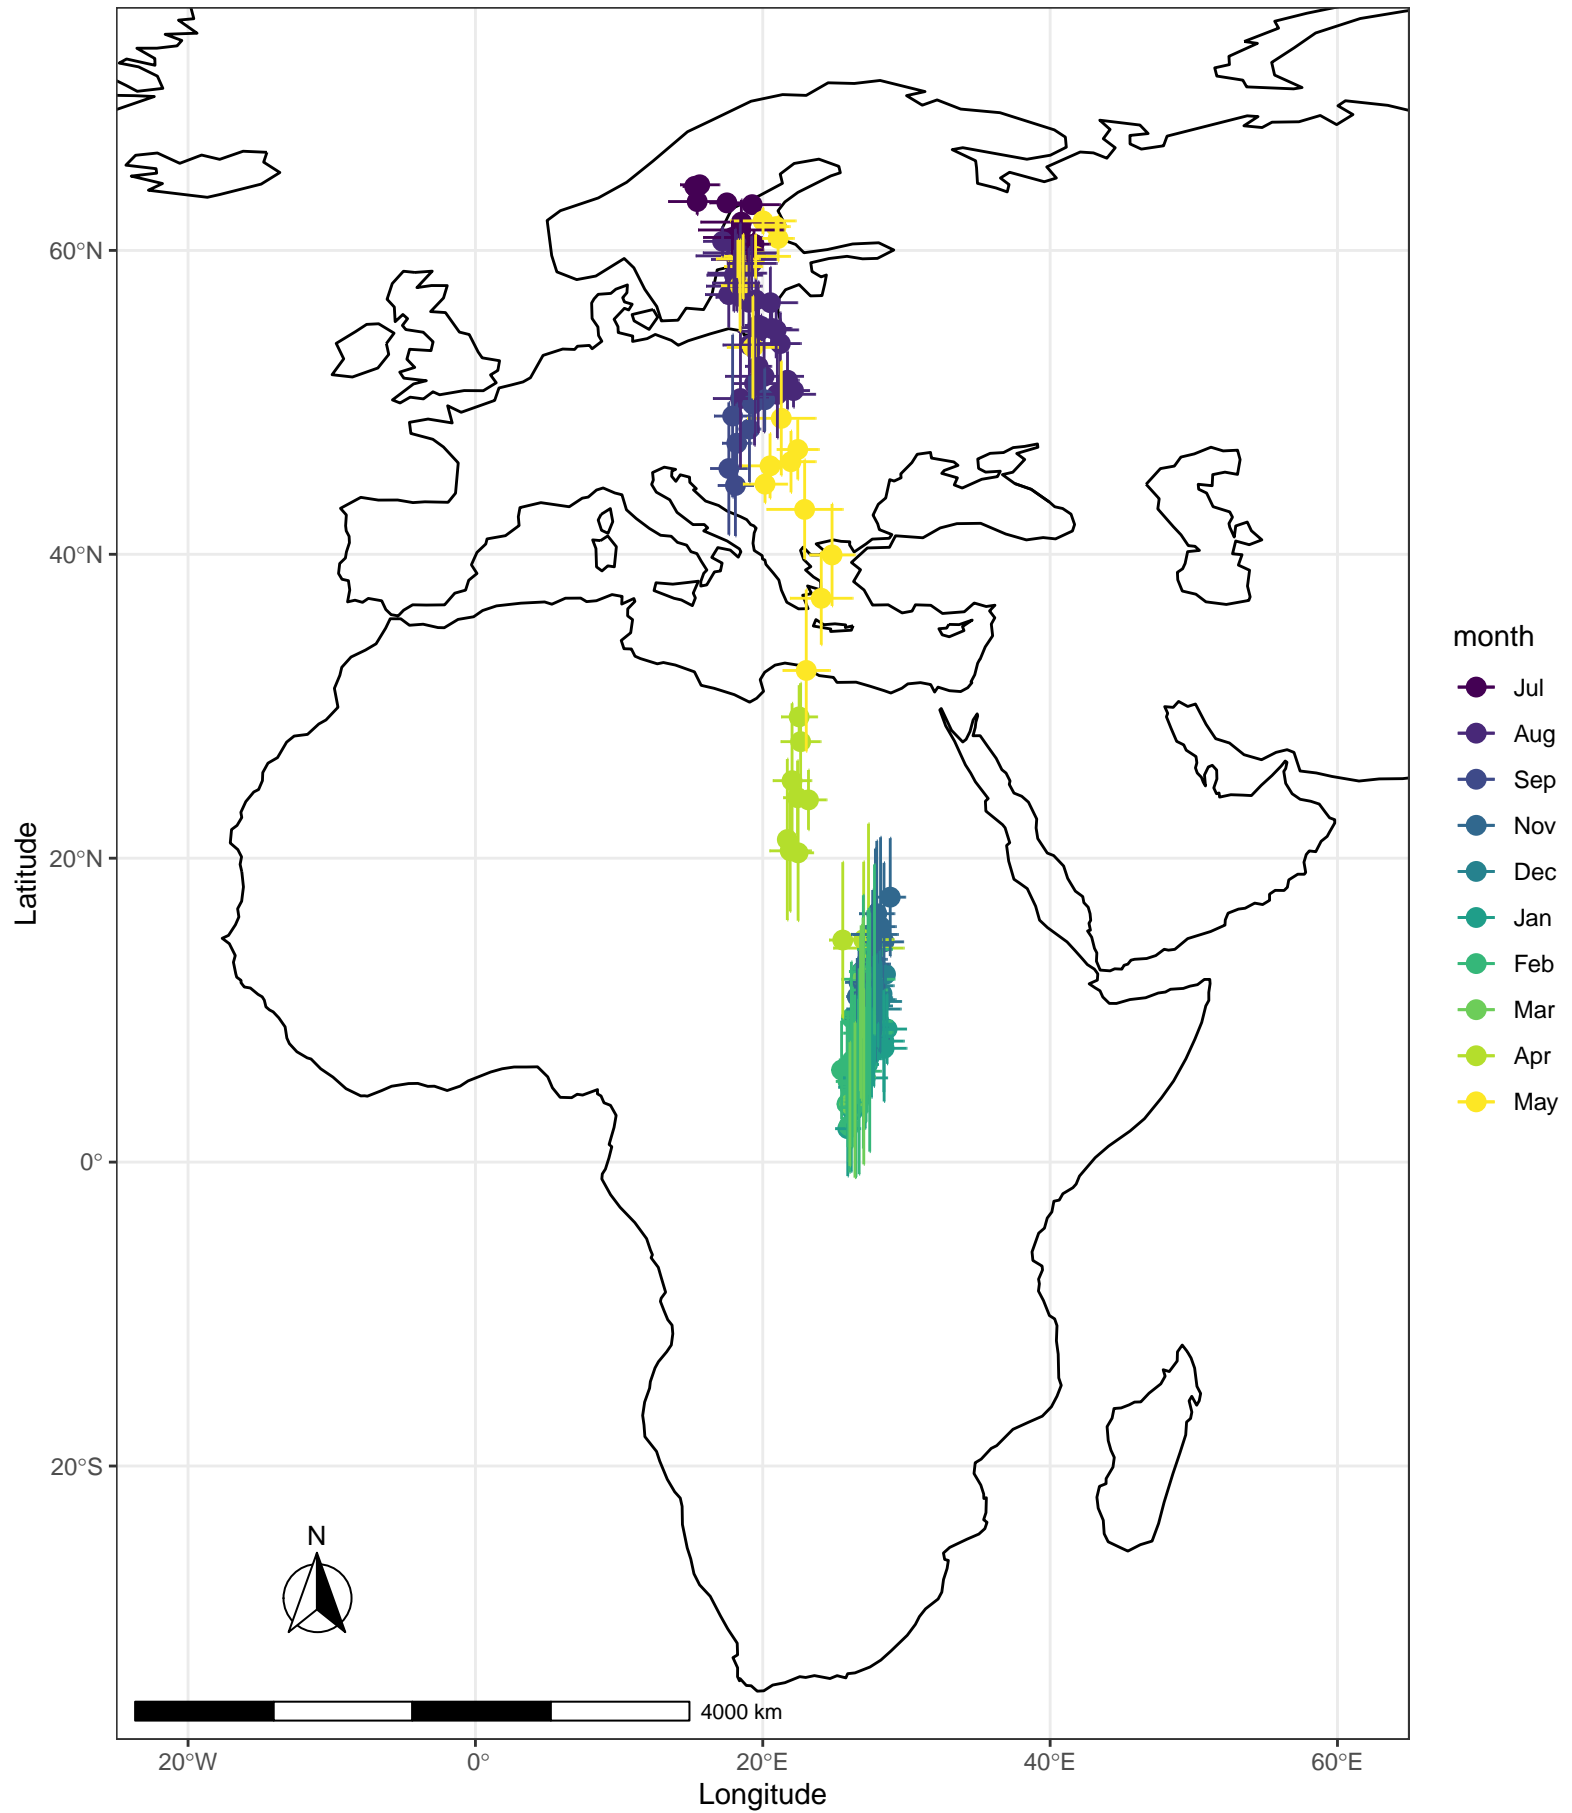

BY193

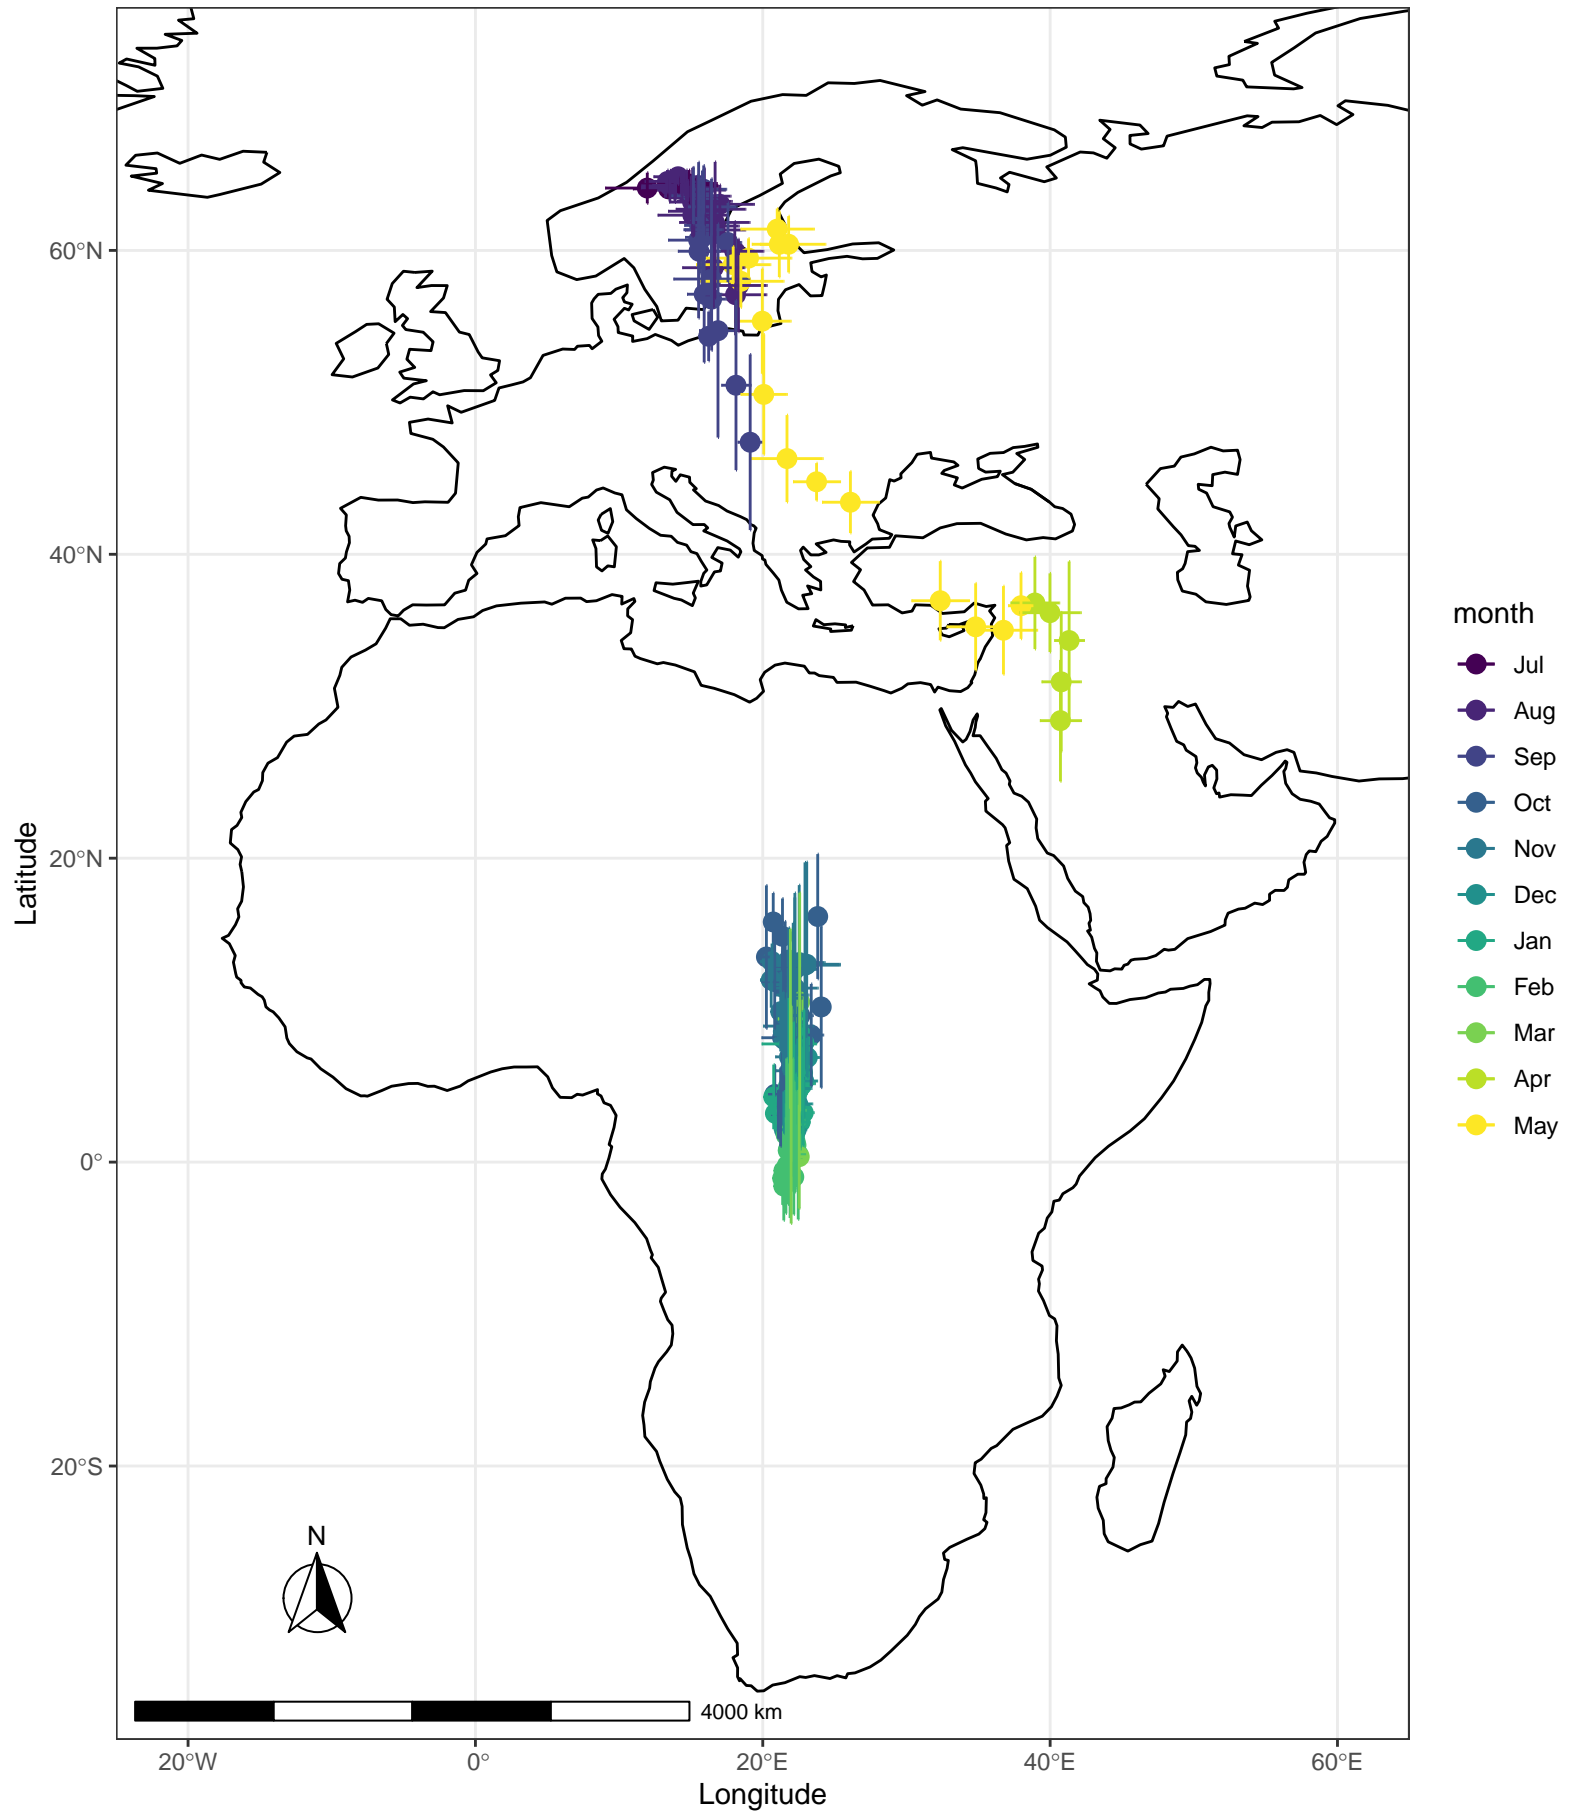

BY235

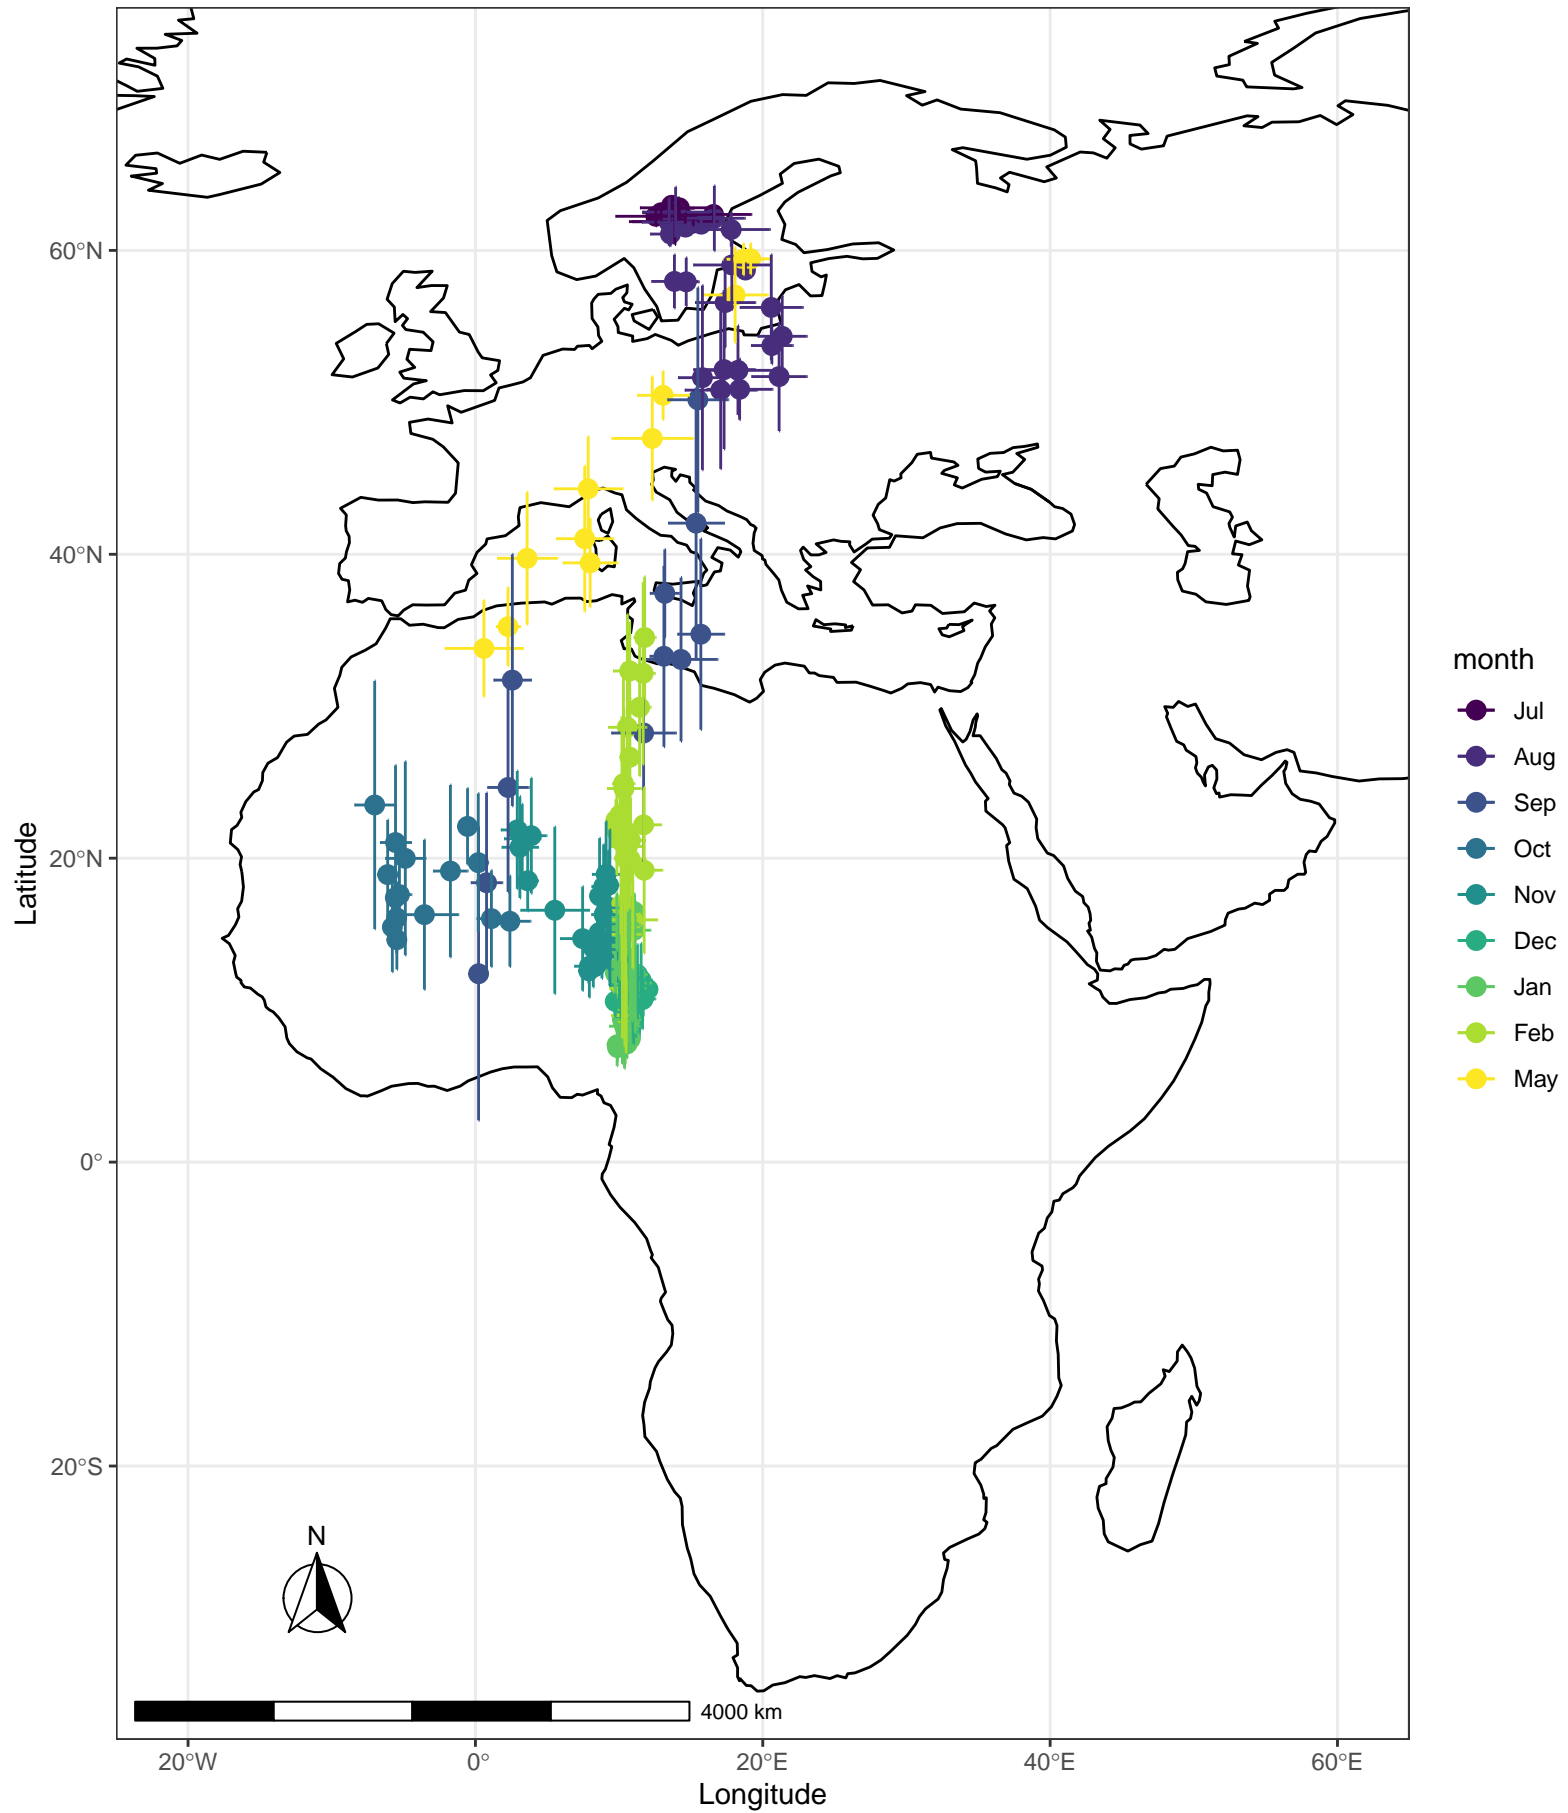



BY186

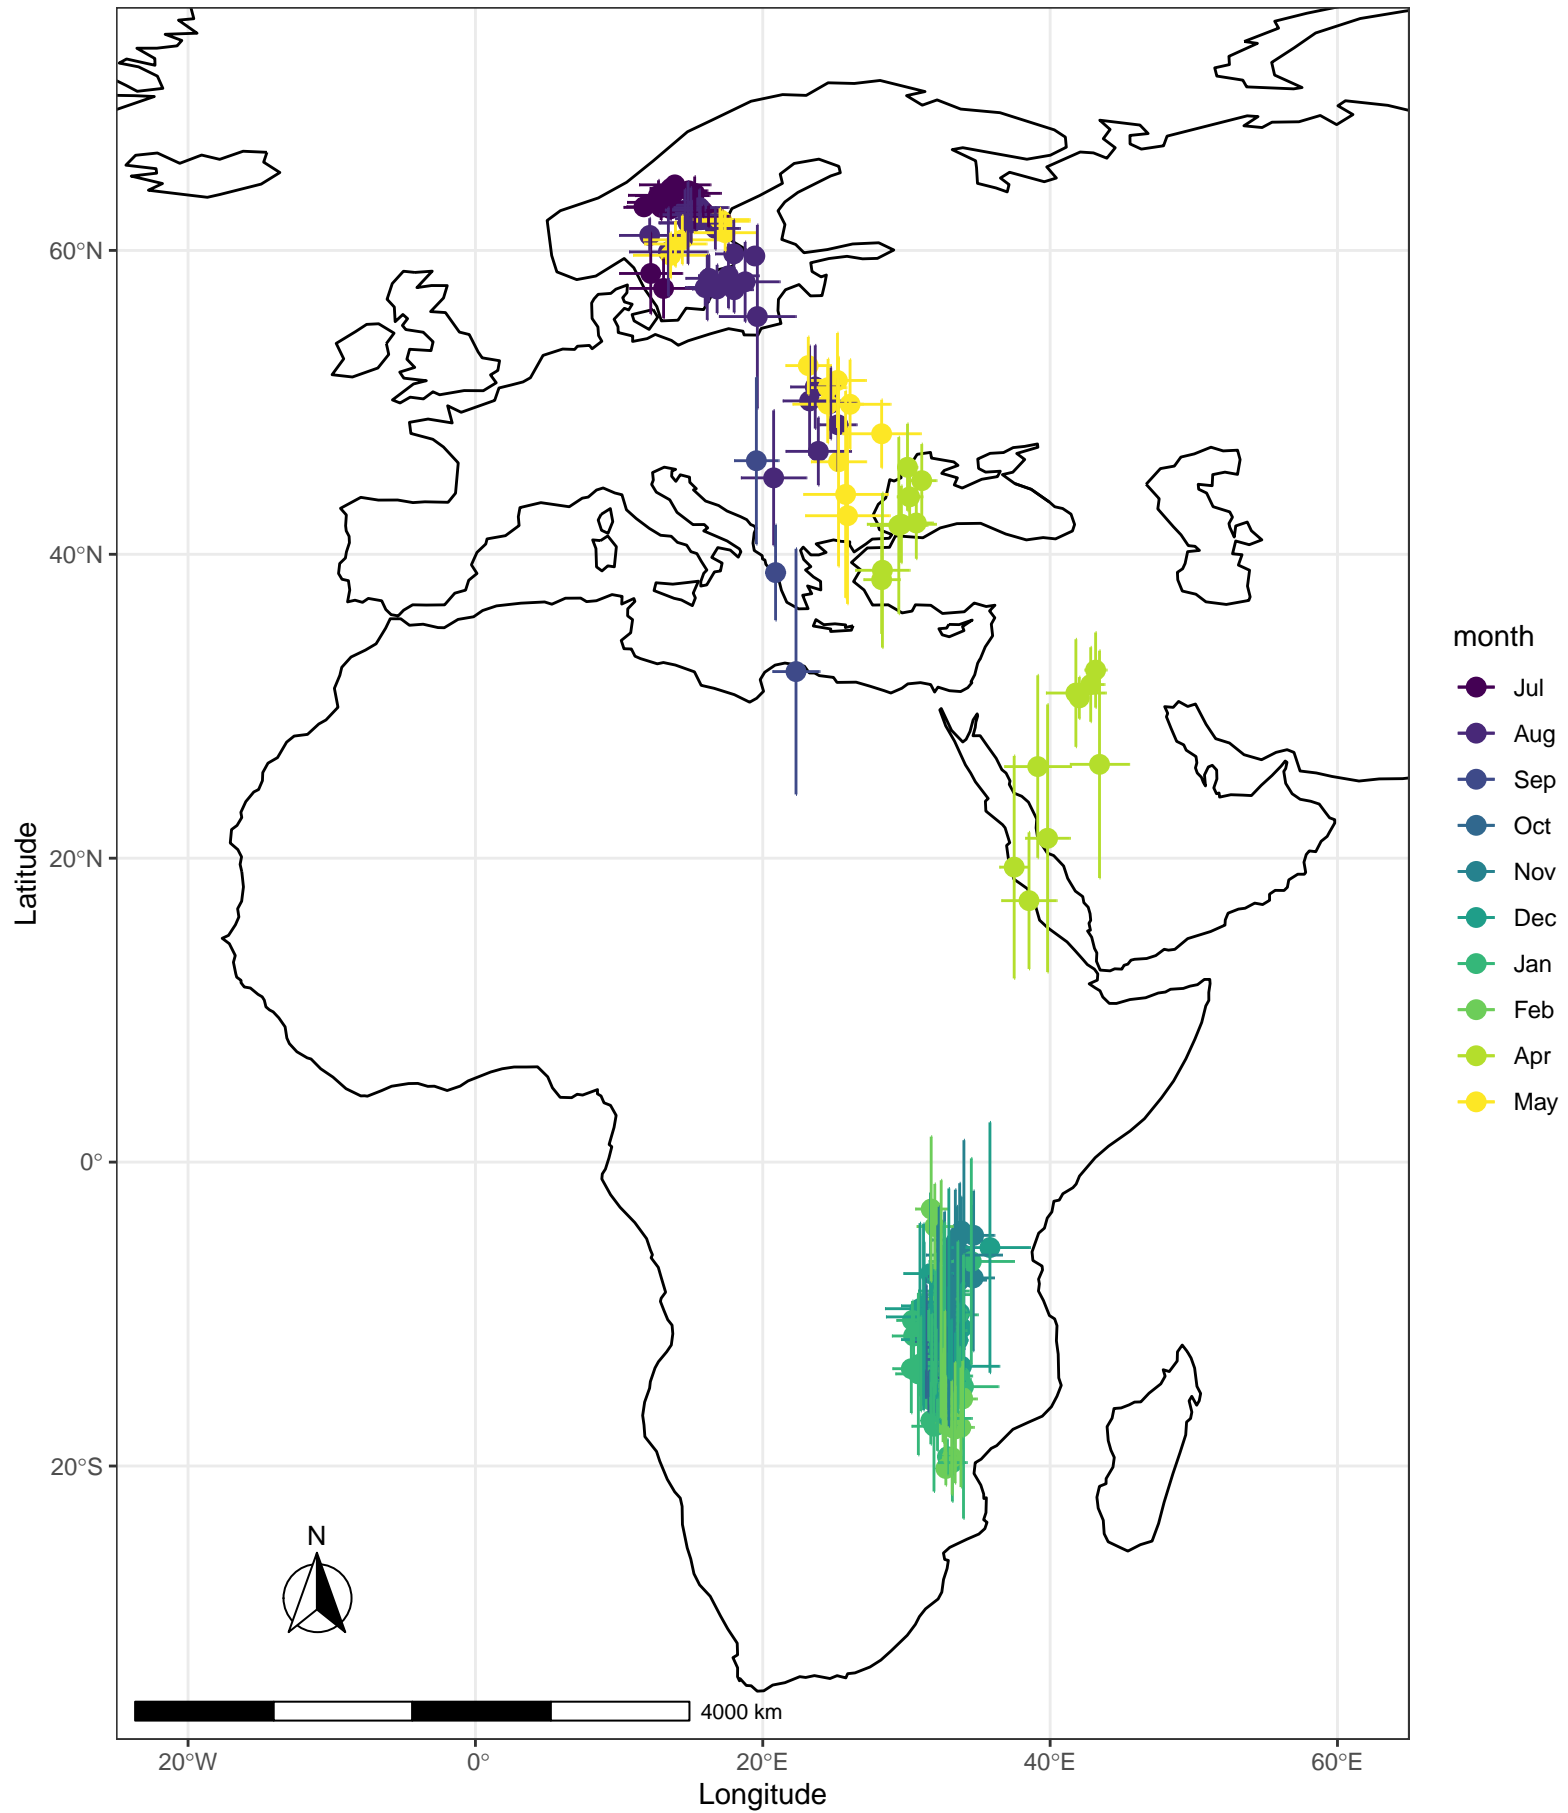

BN675

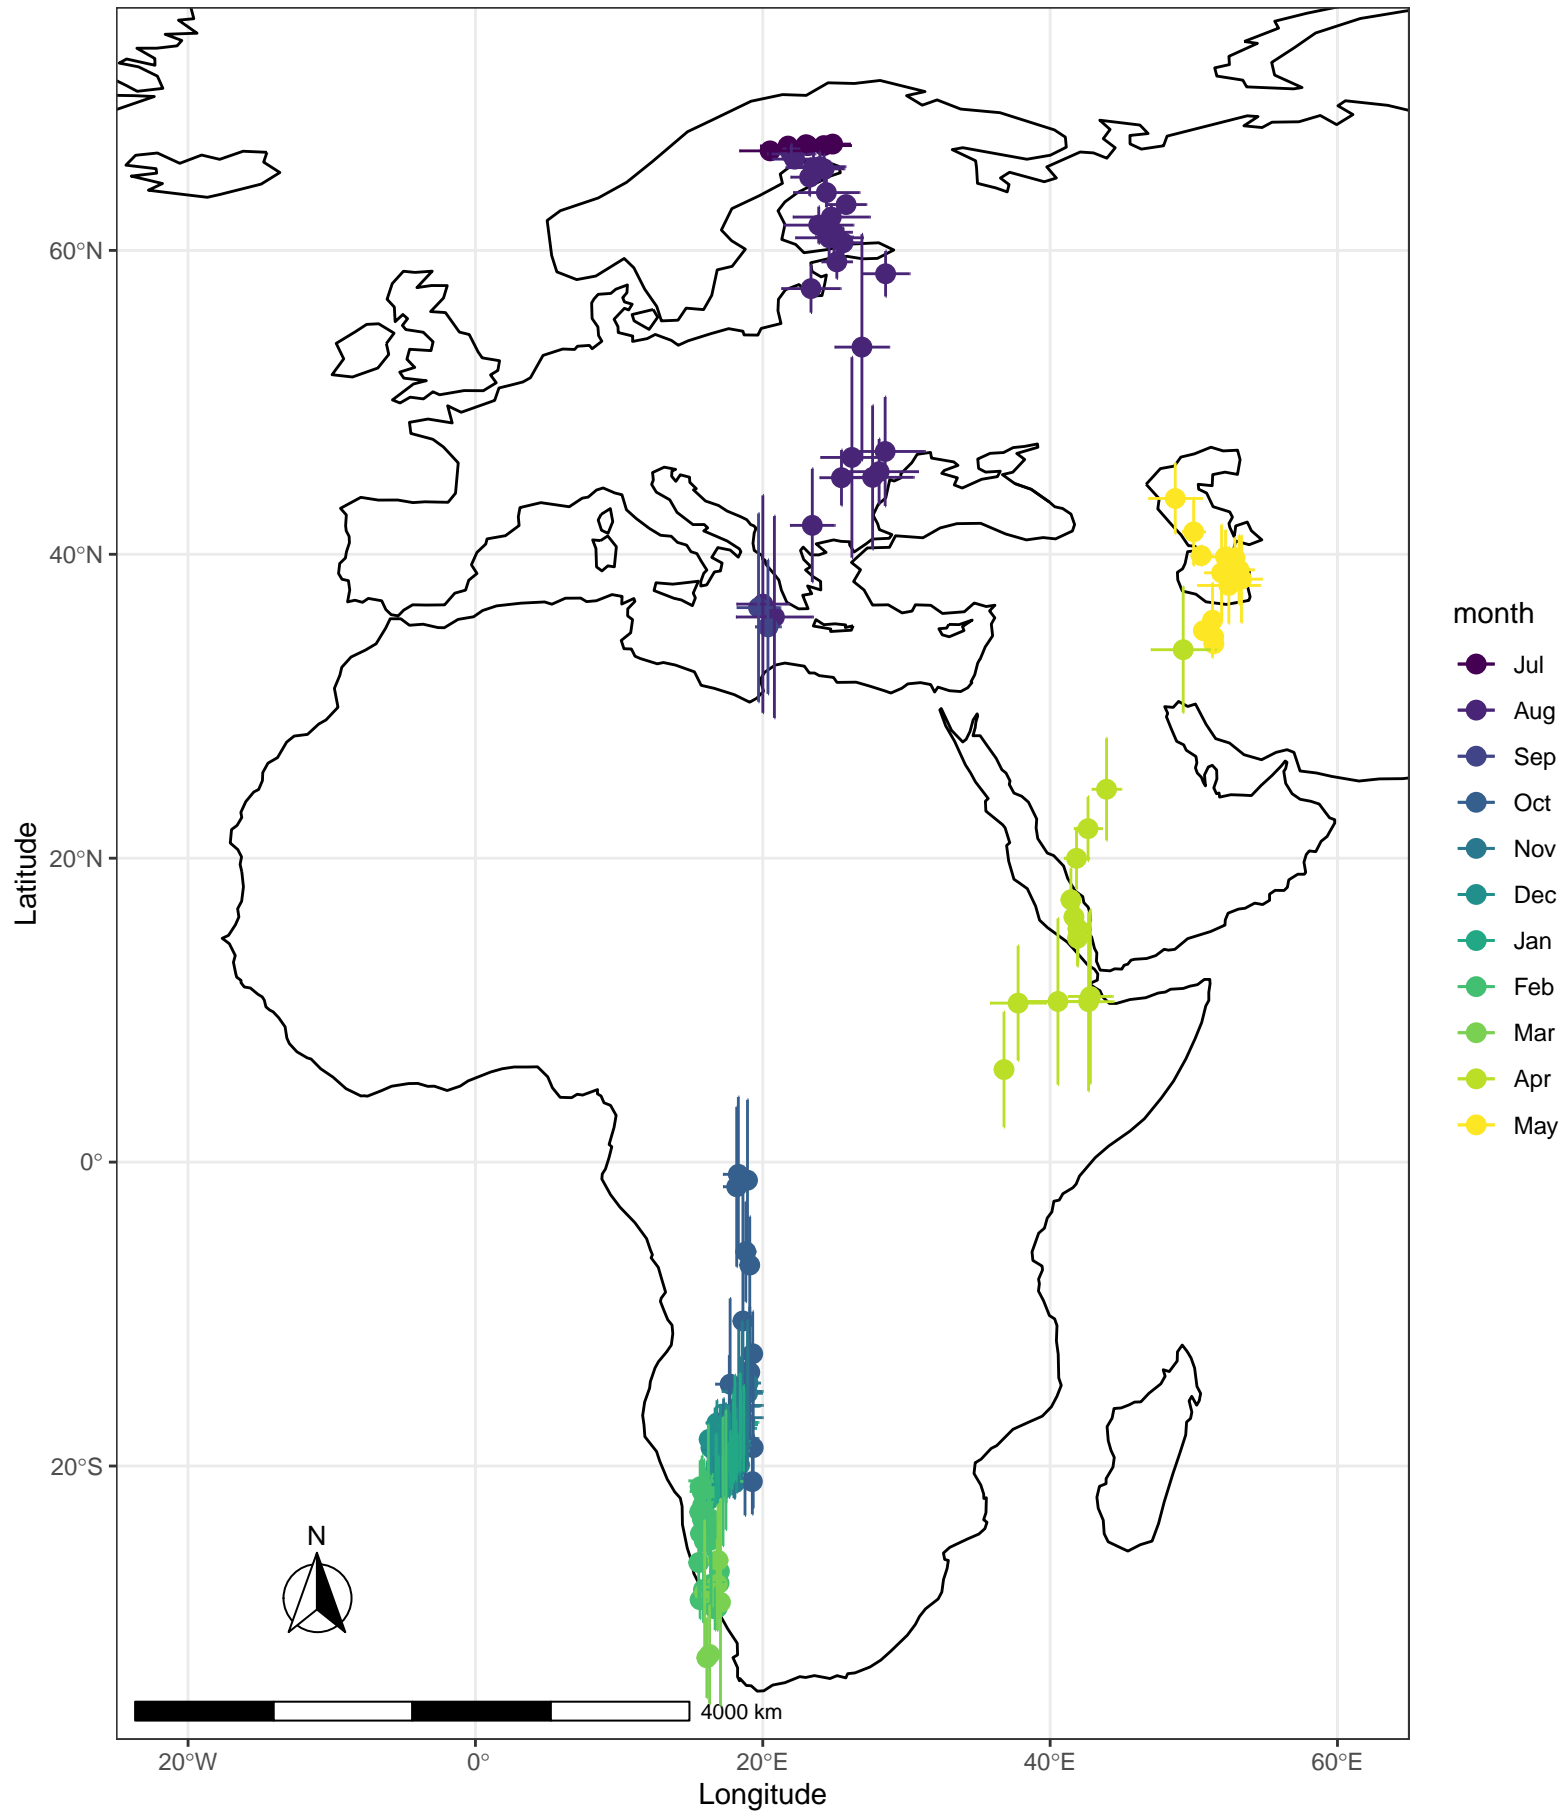

BN626

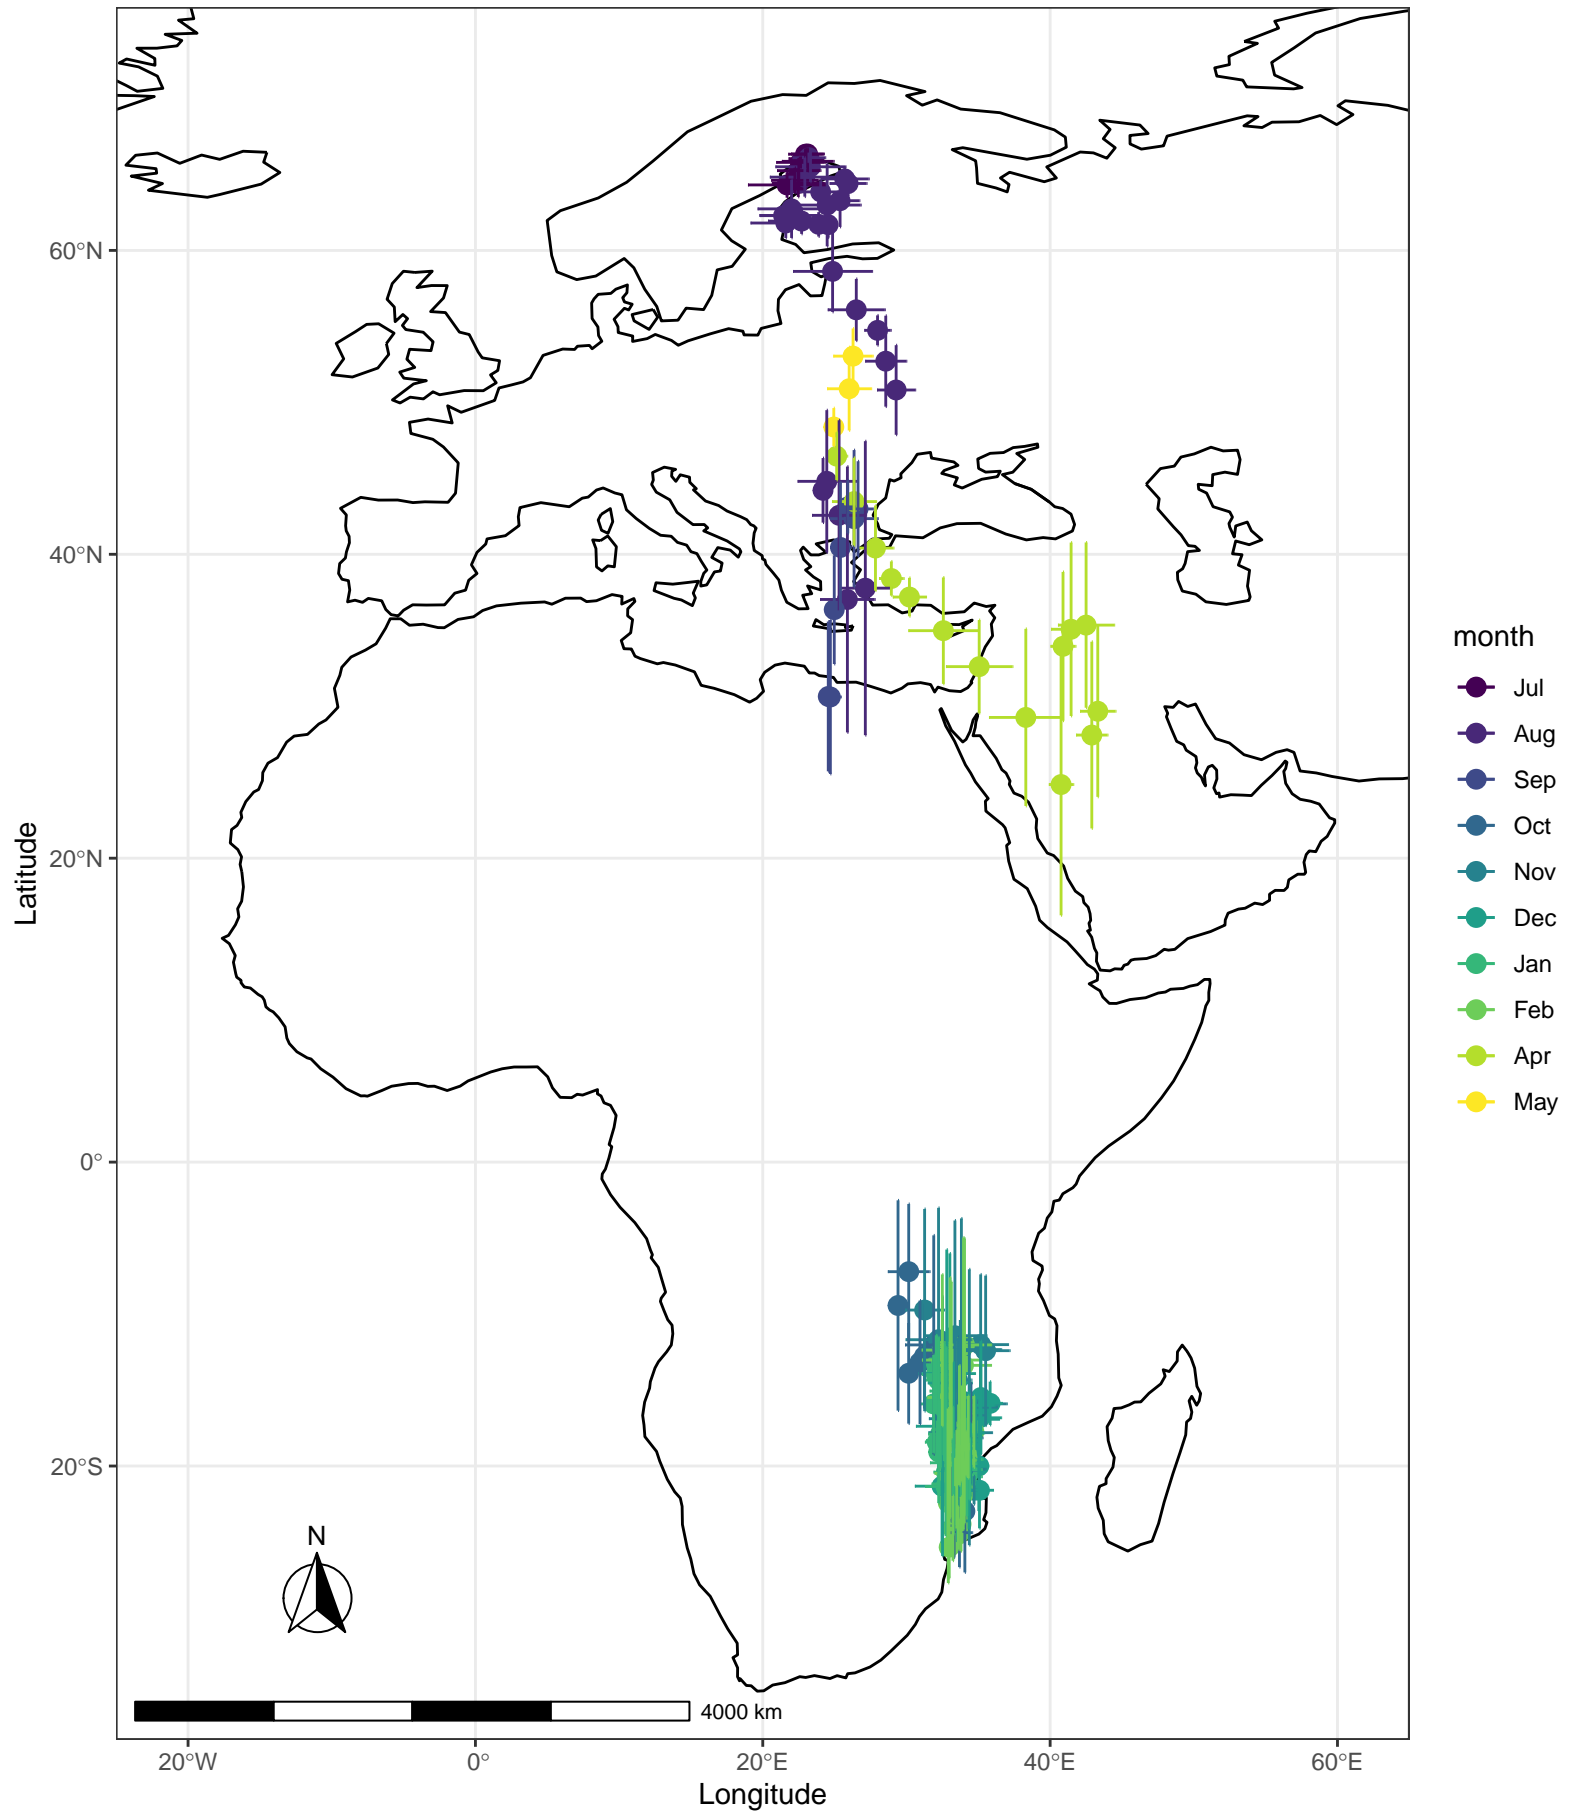

BN670

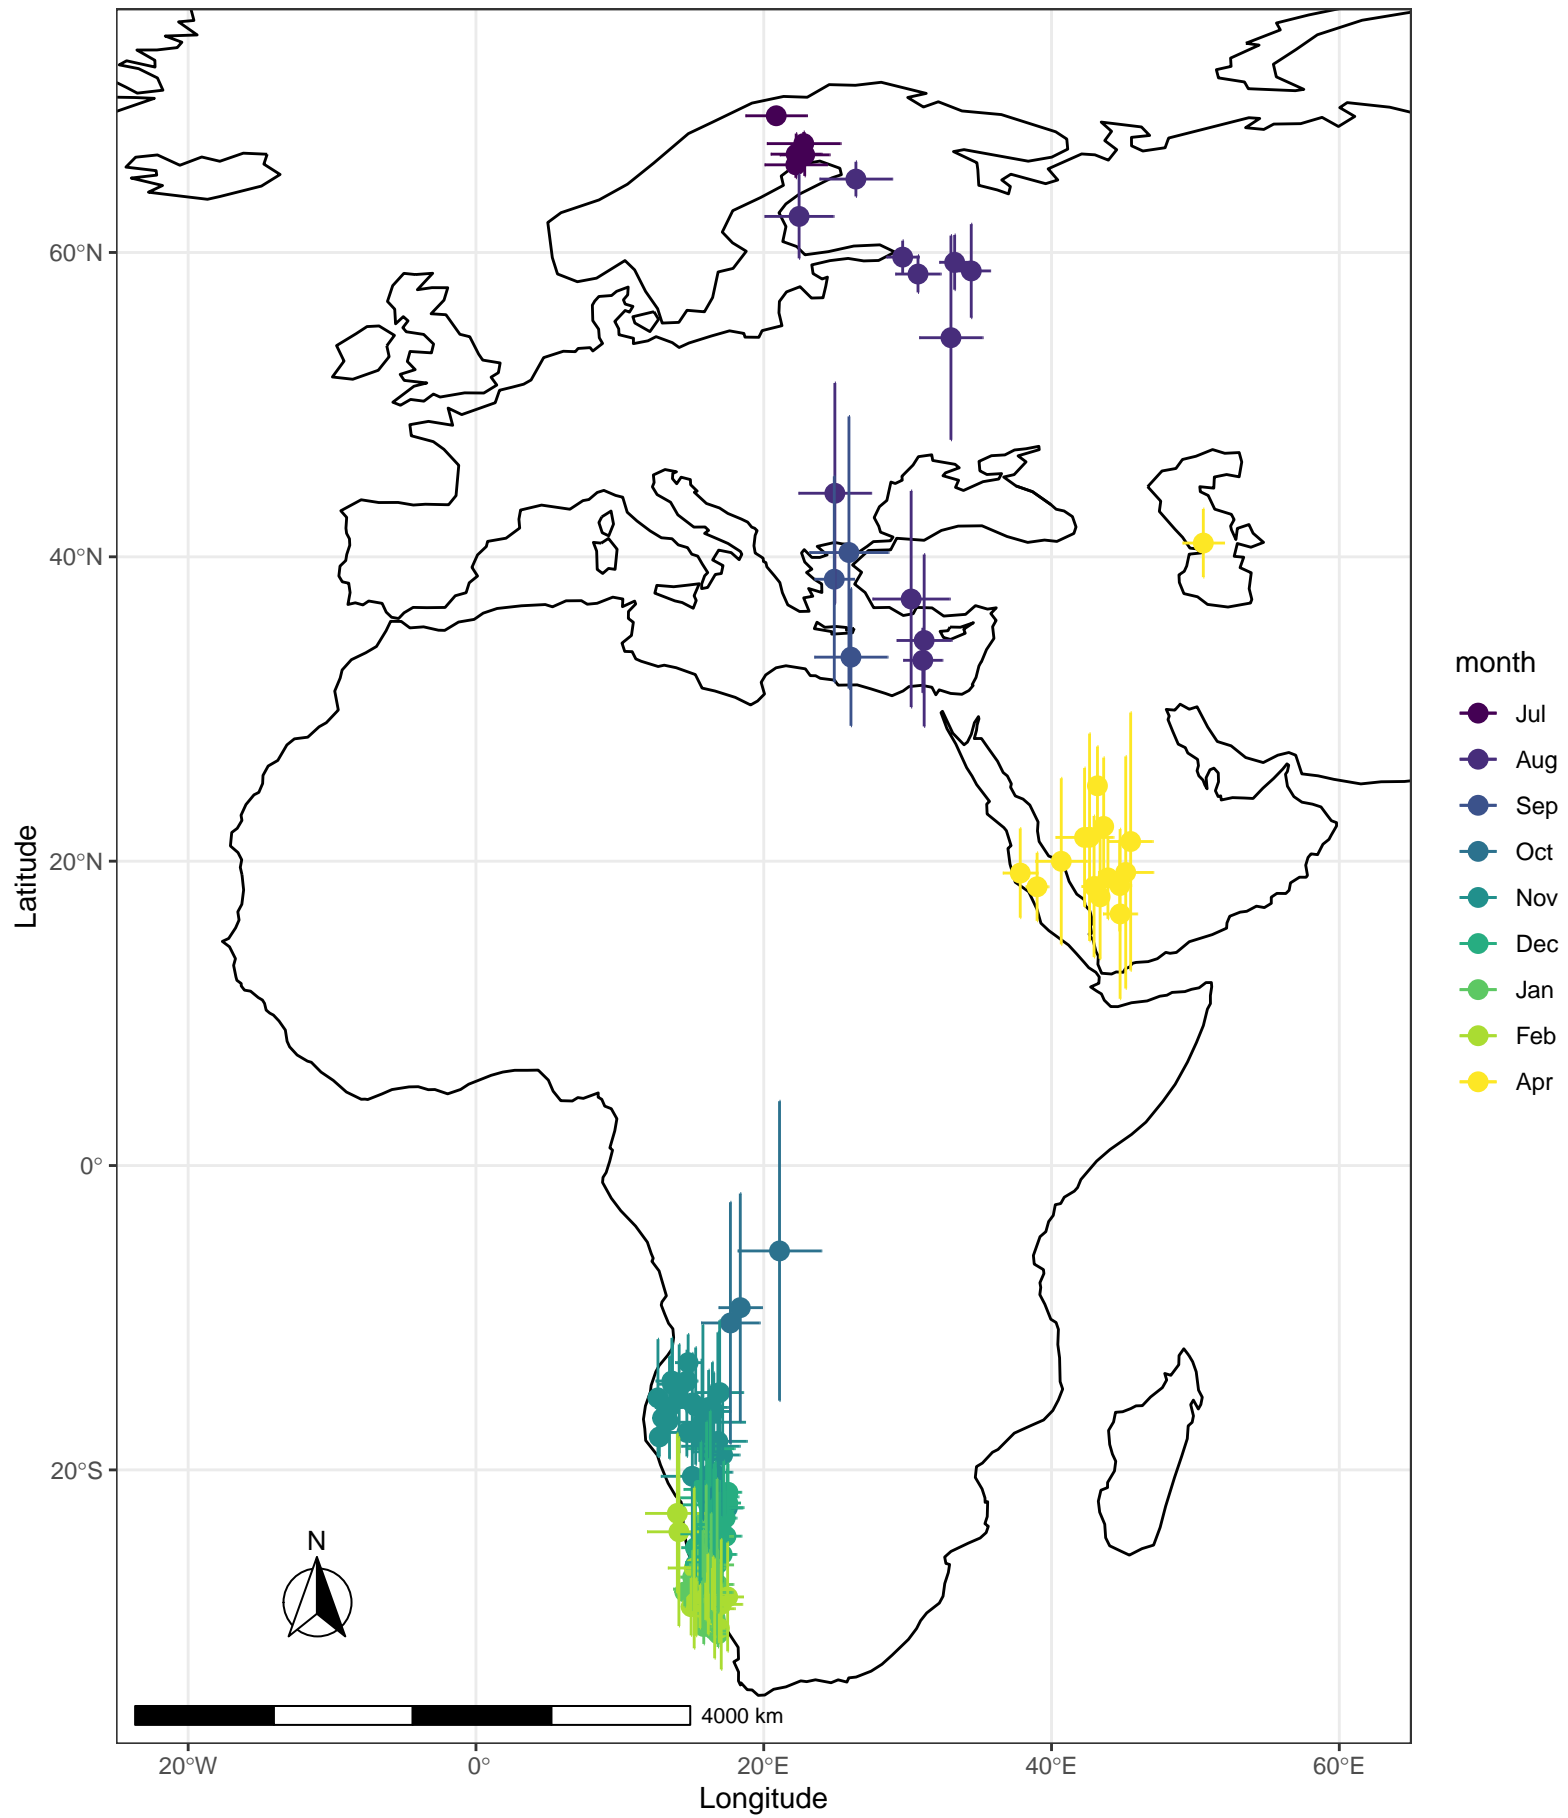

BN658

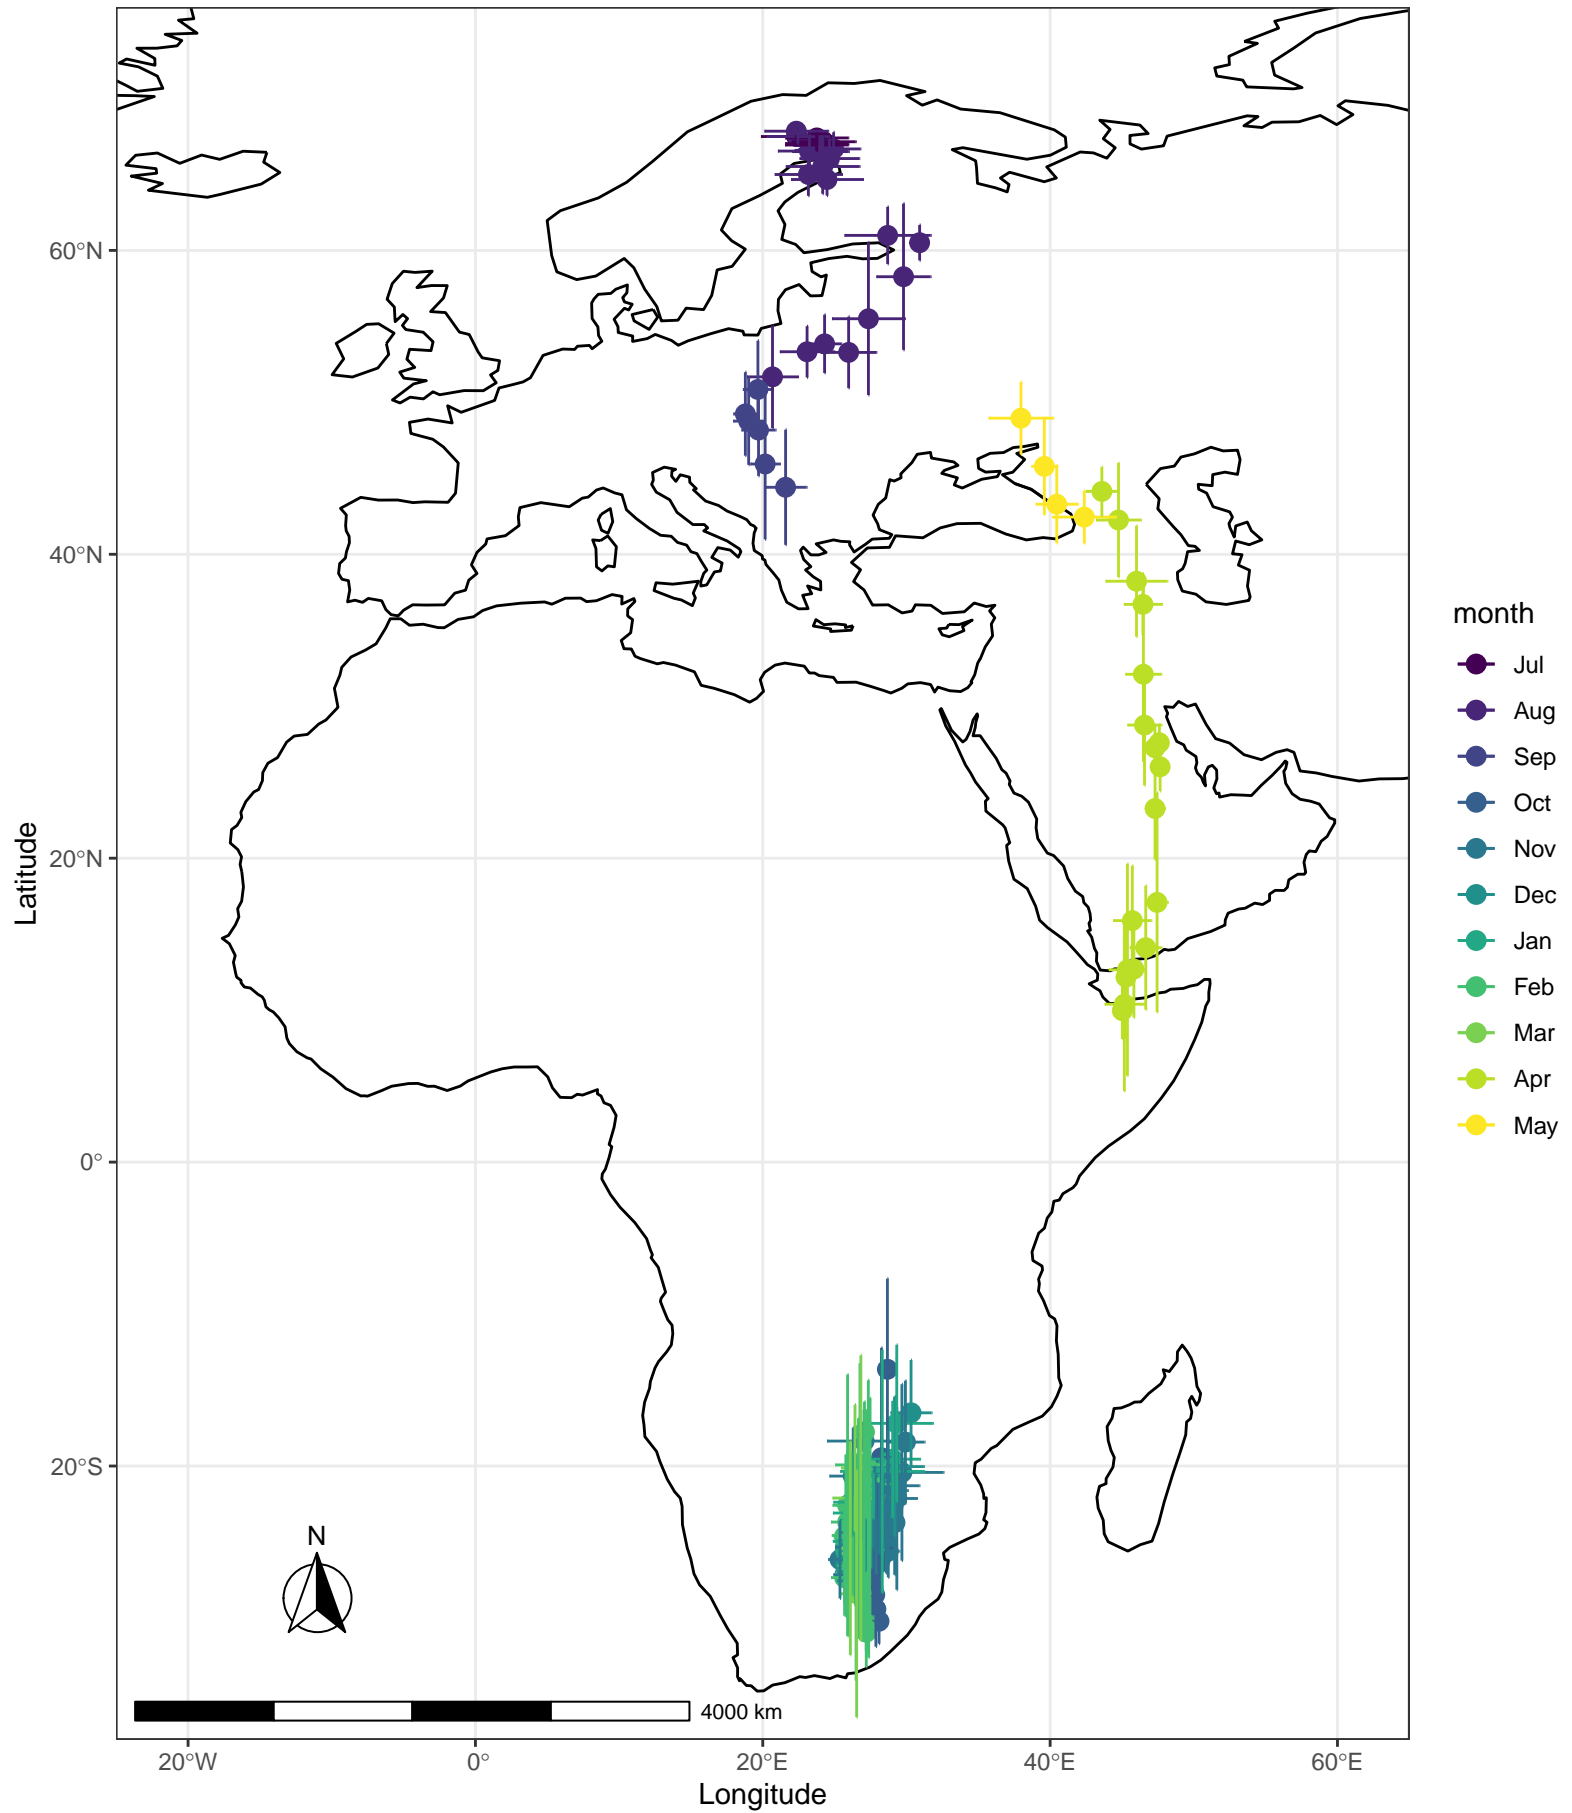

BN632

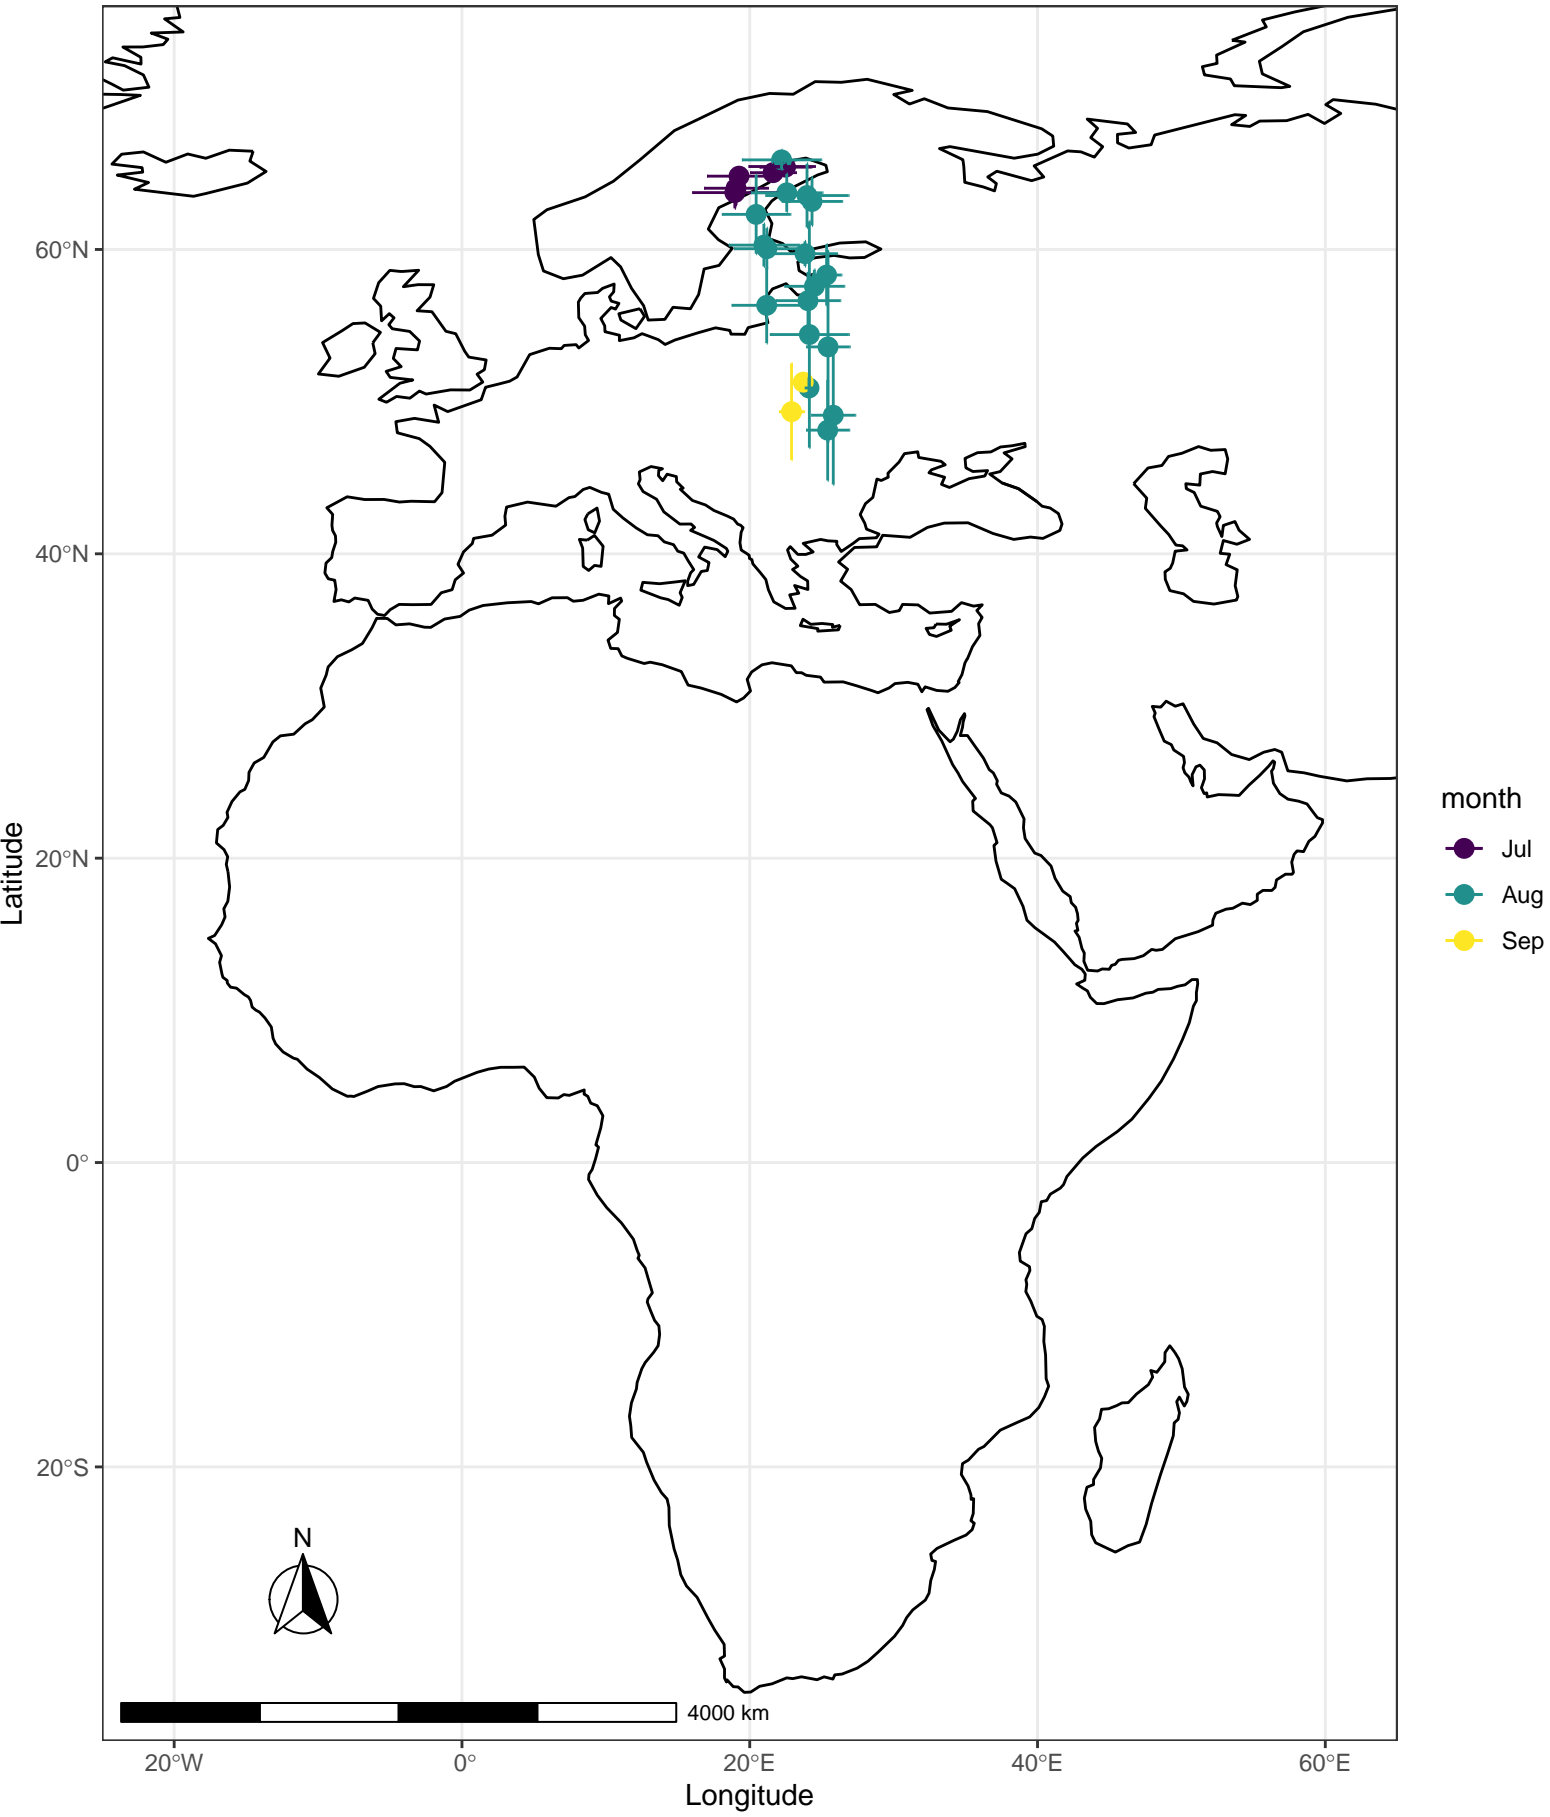

BN641

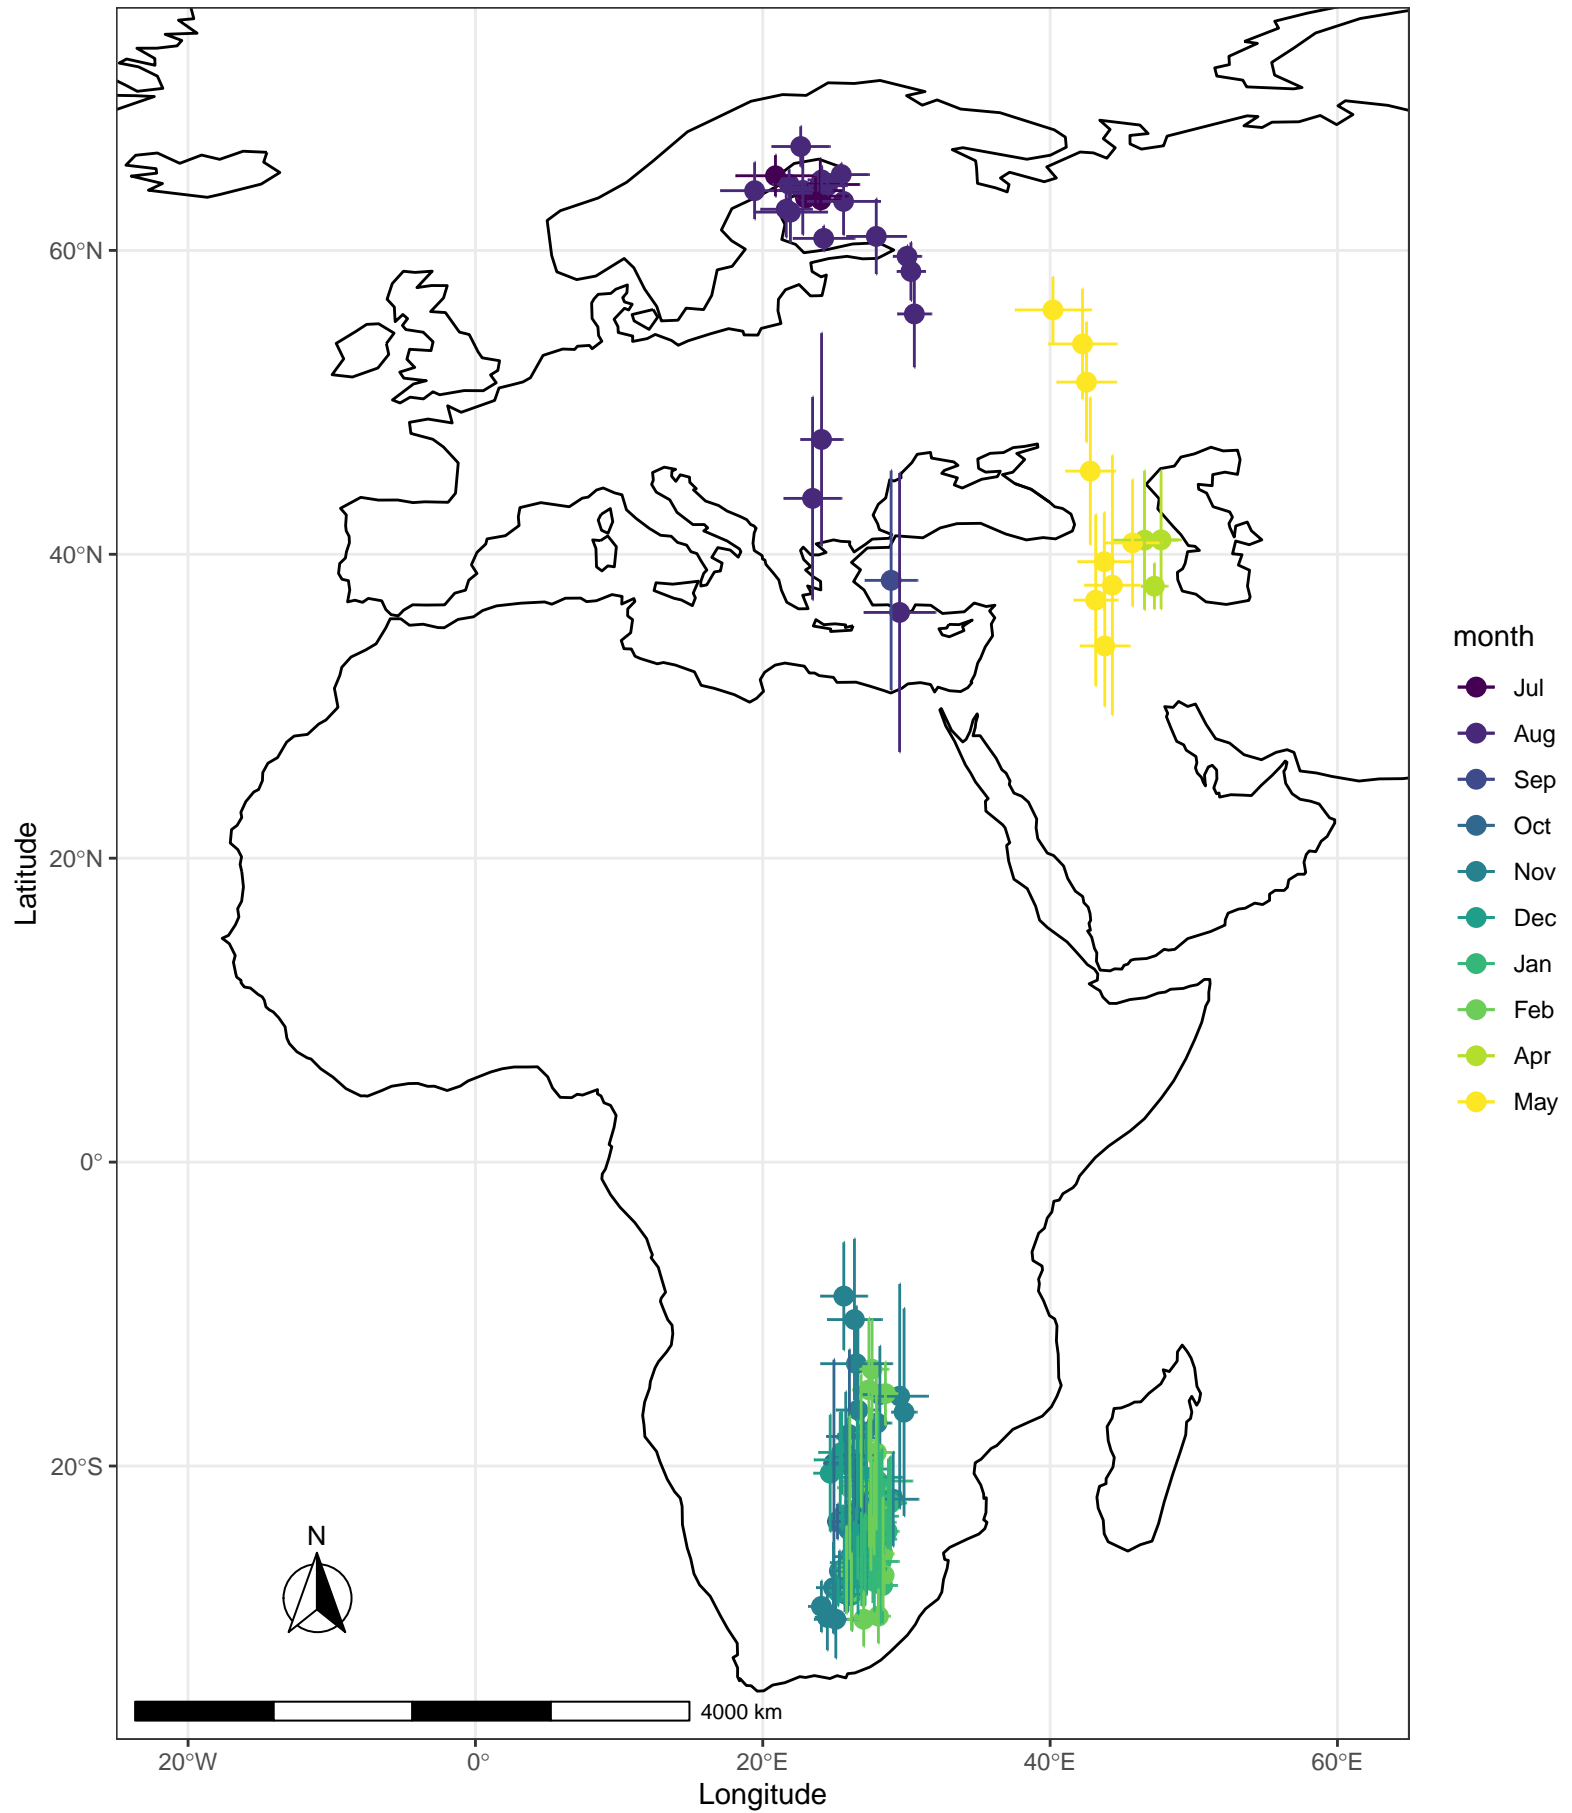

BN128

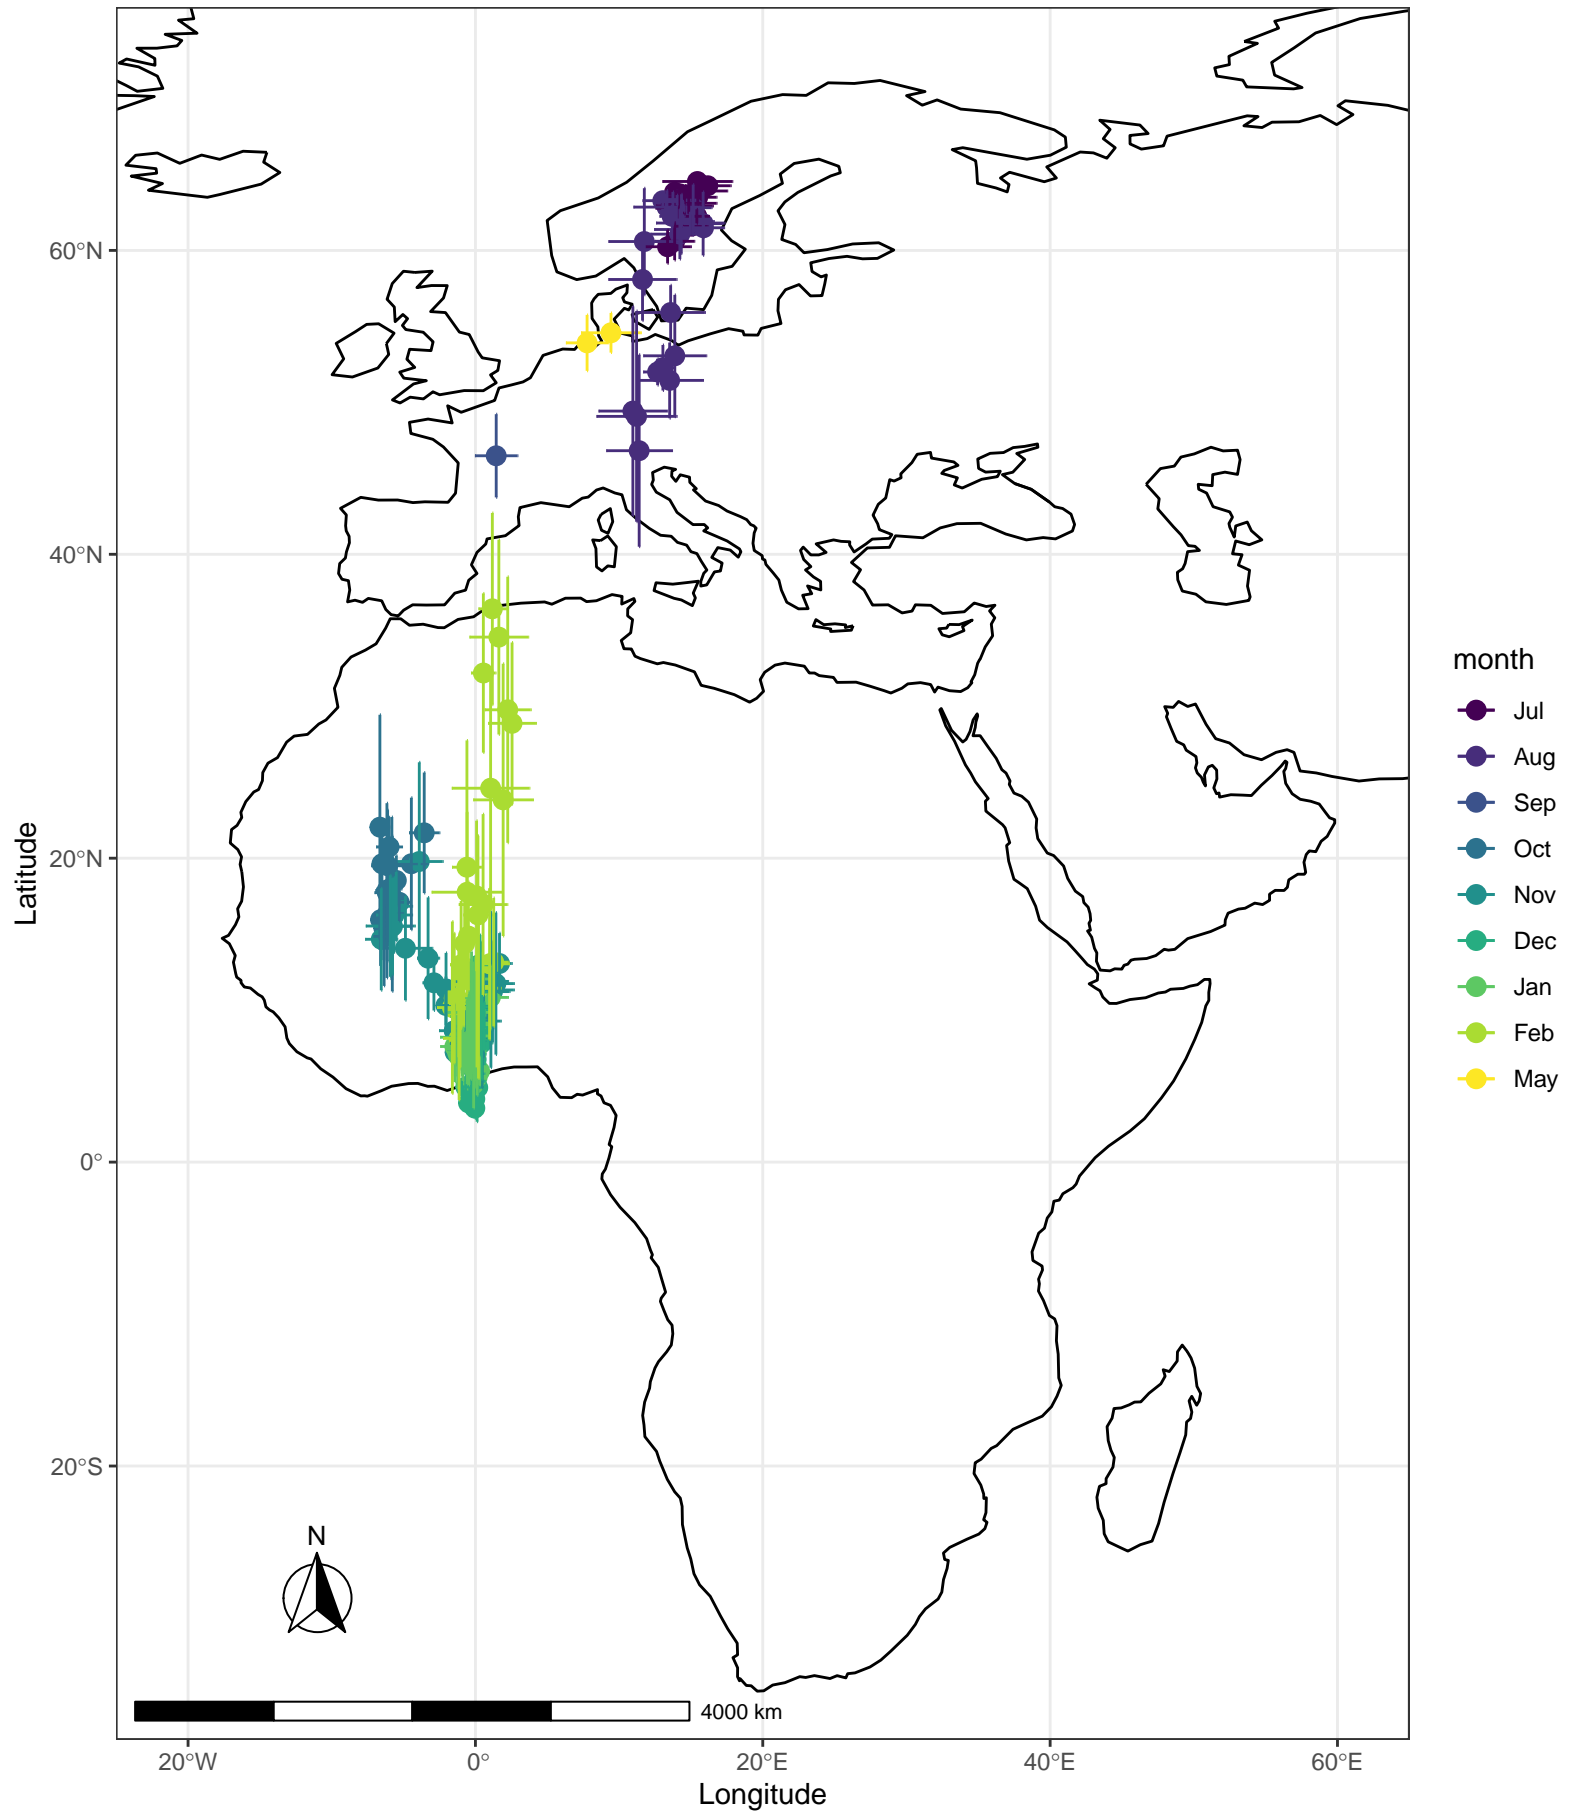



BN111

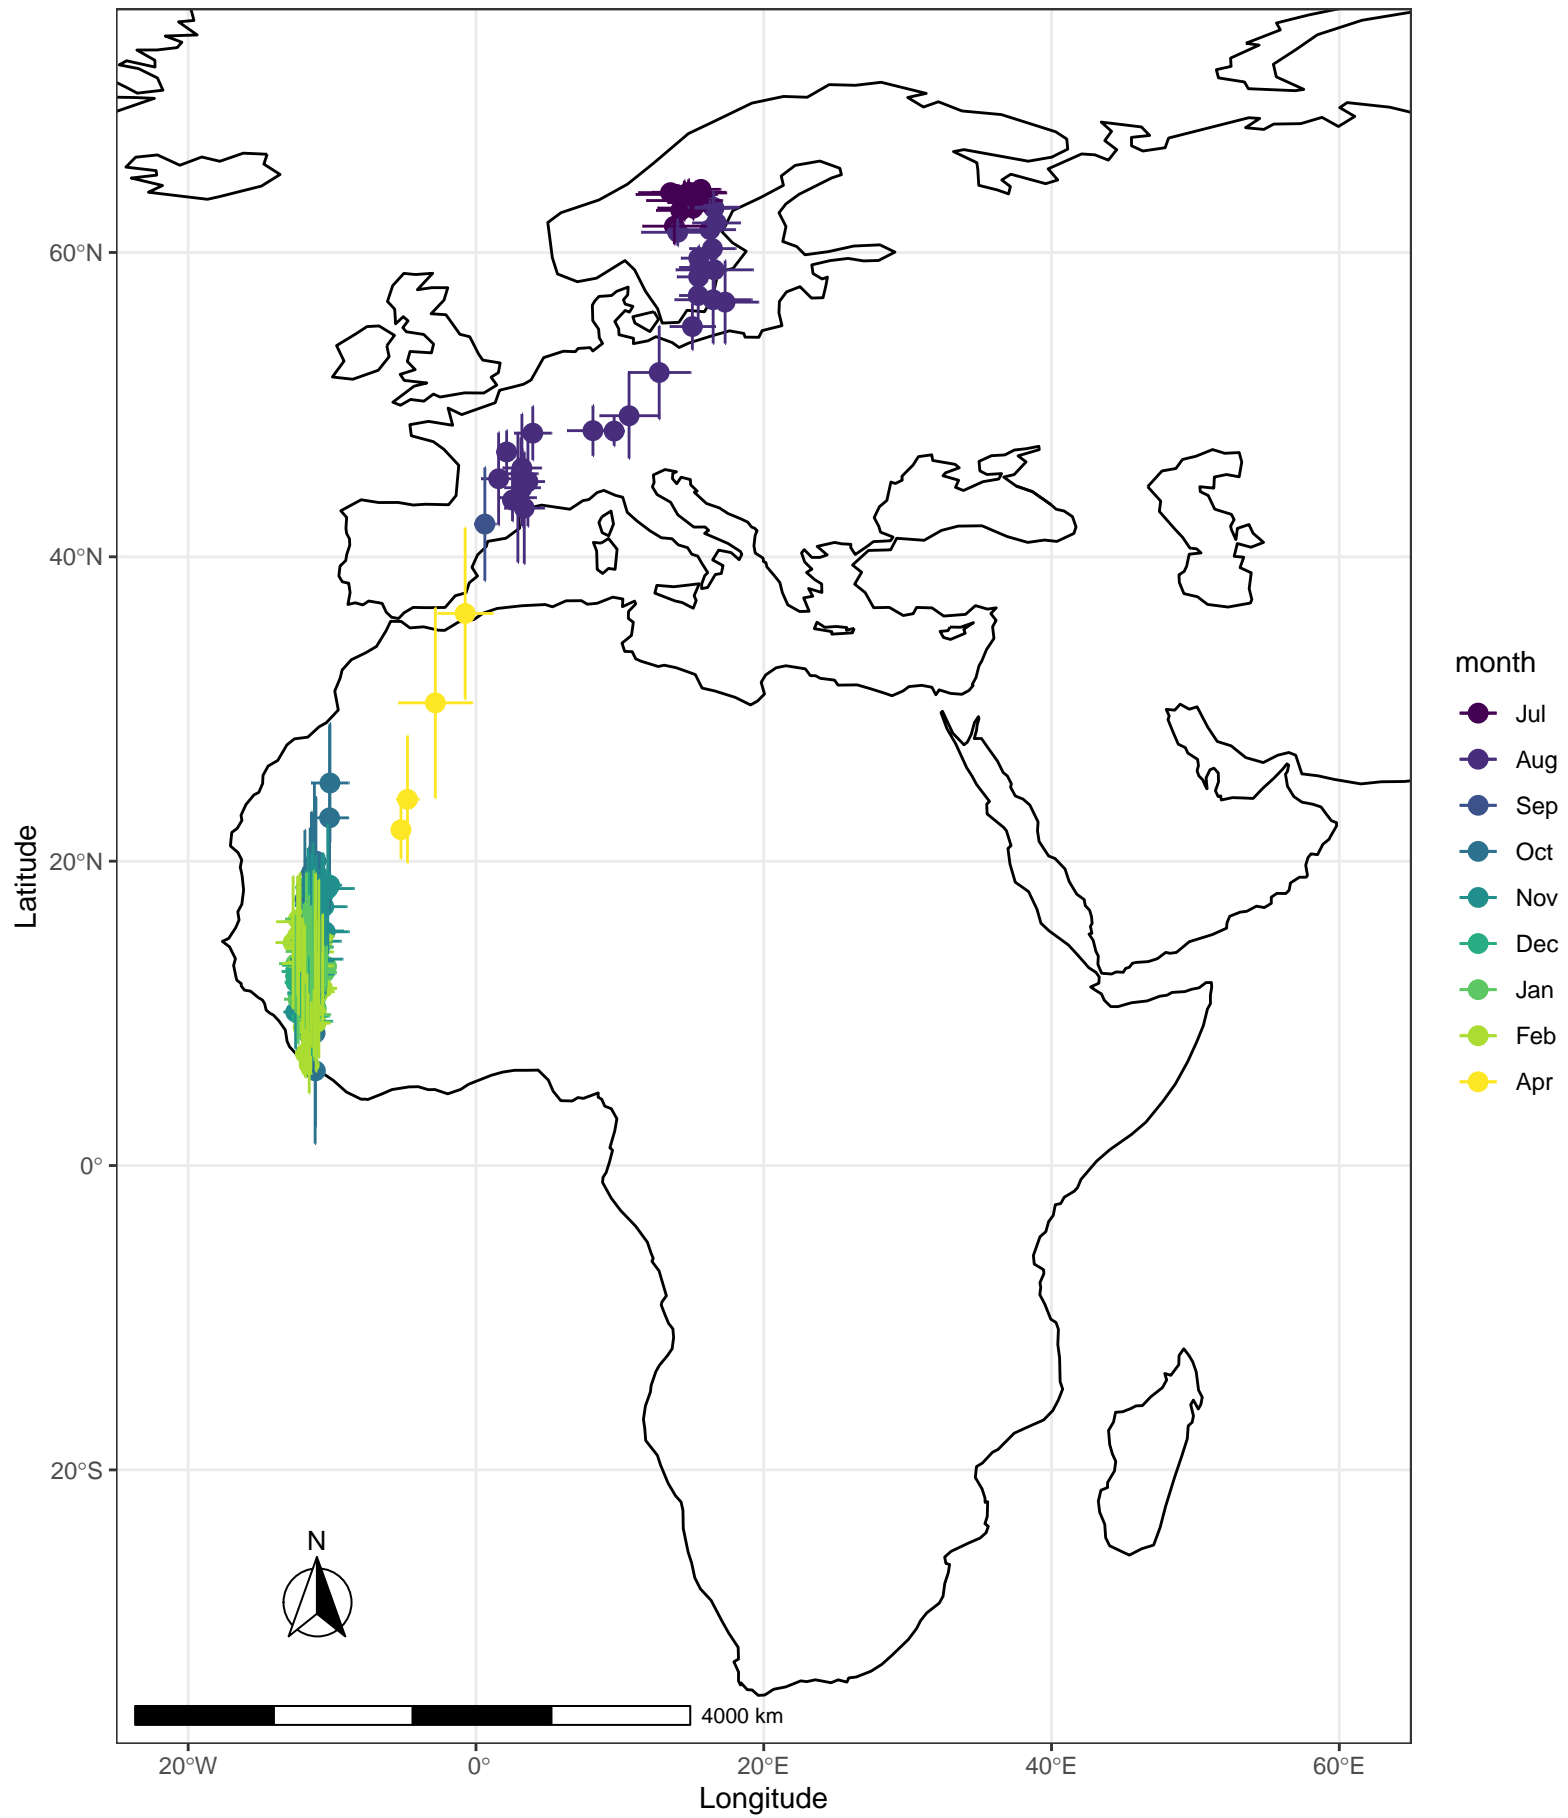

BN159

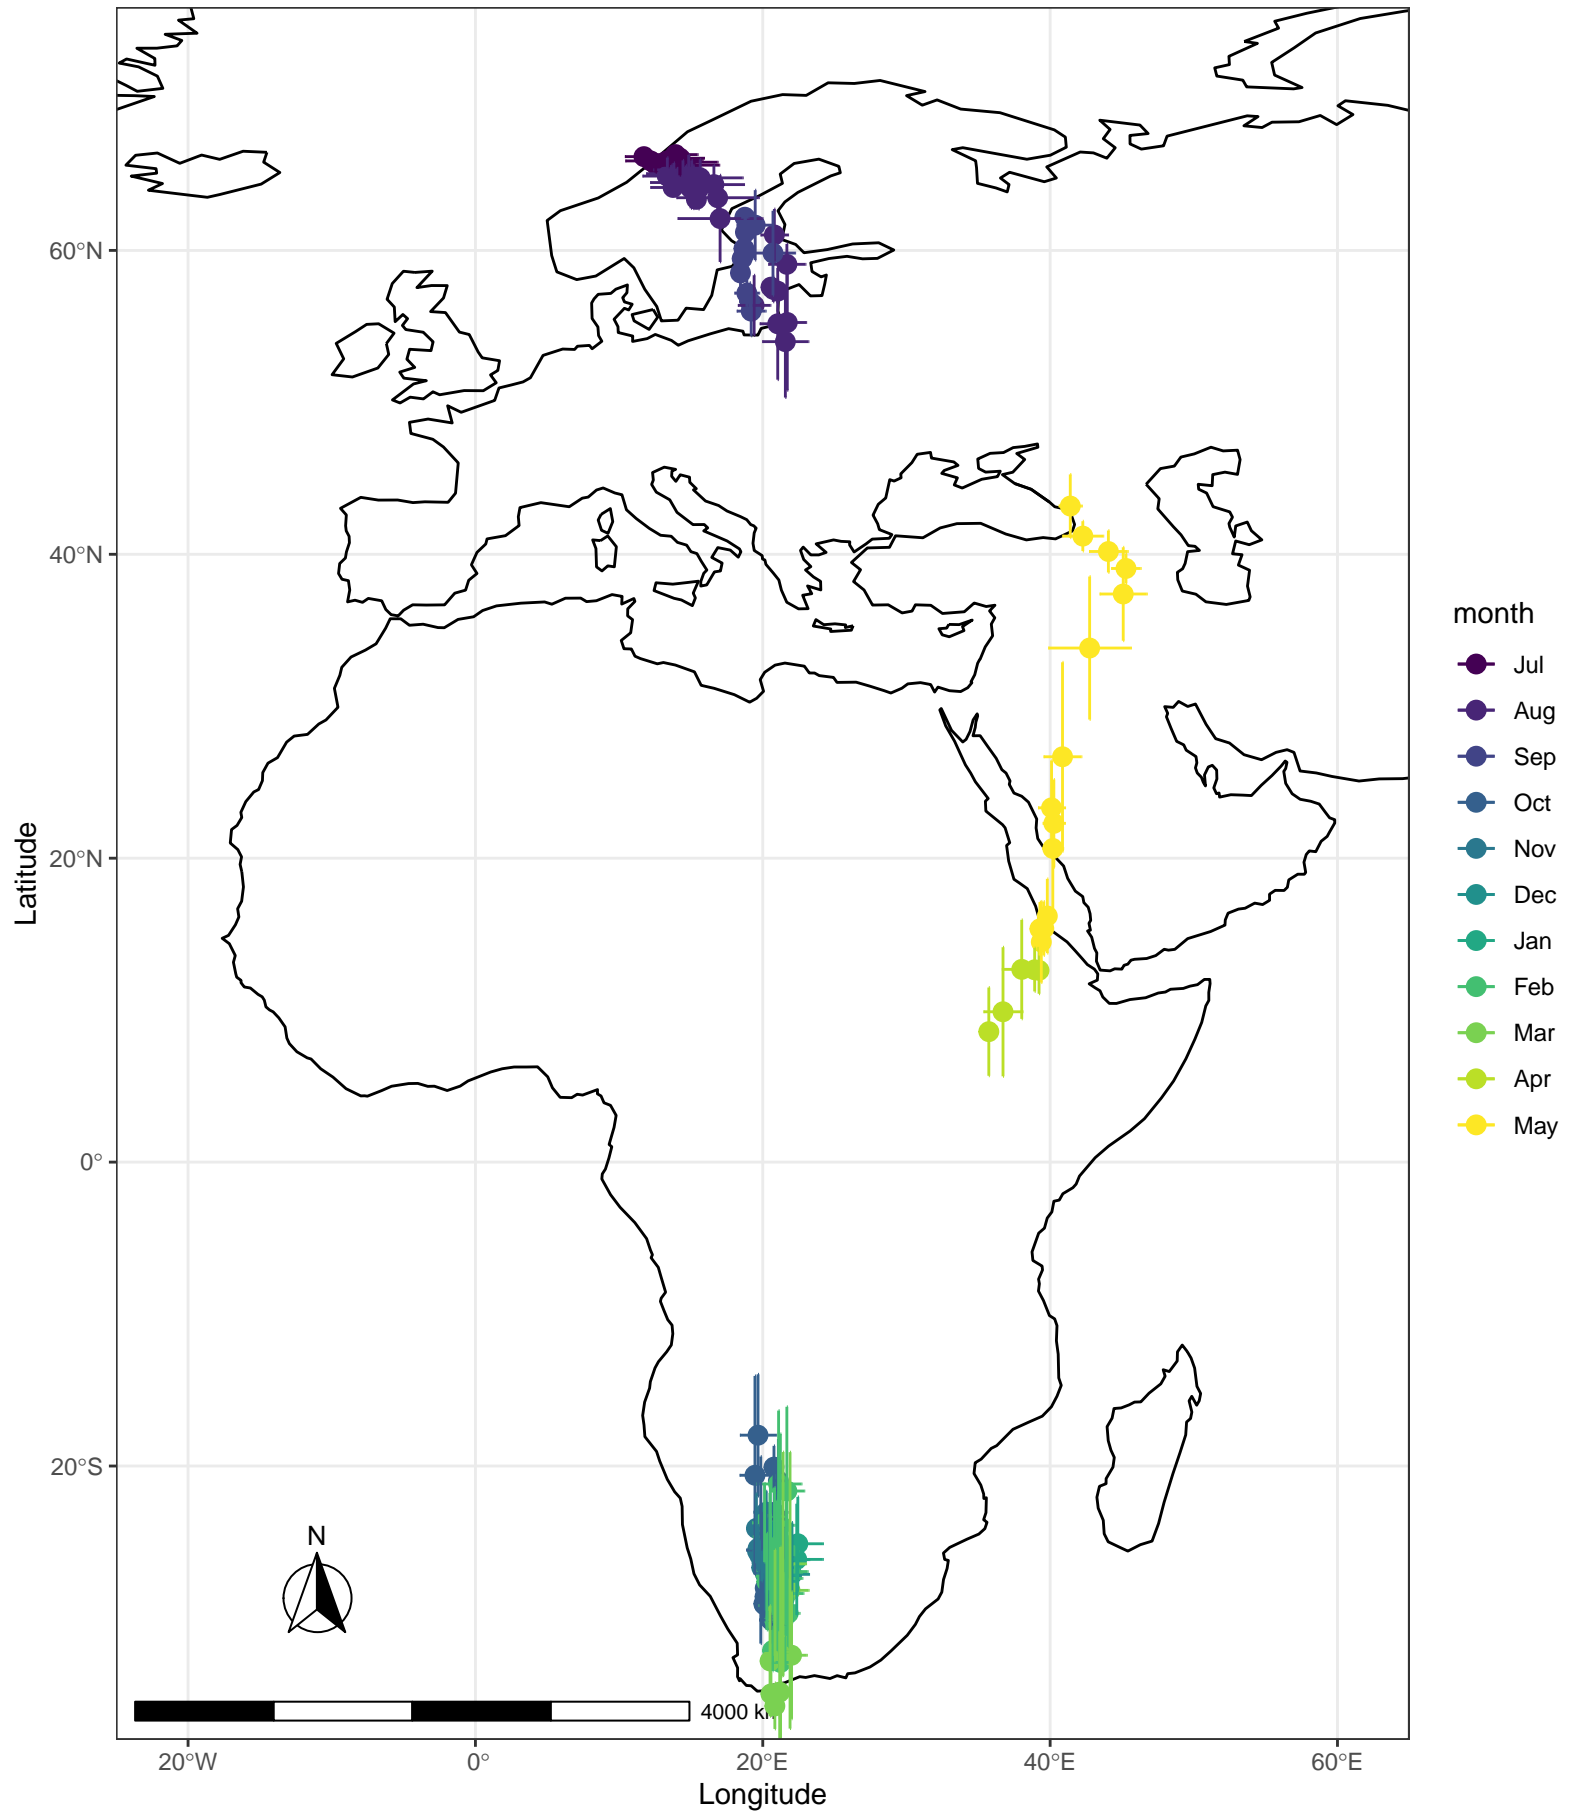

BM402

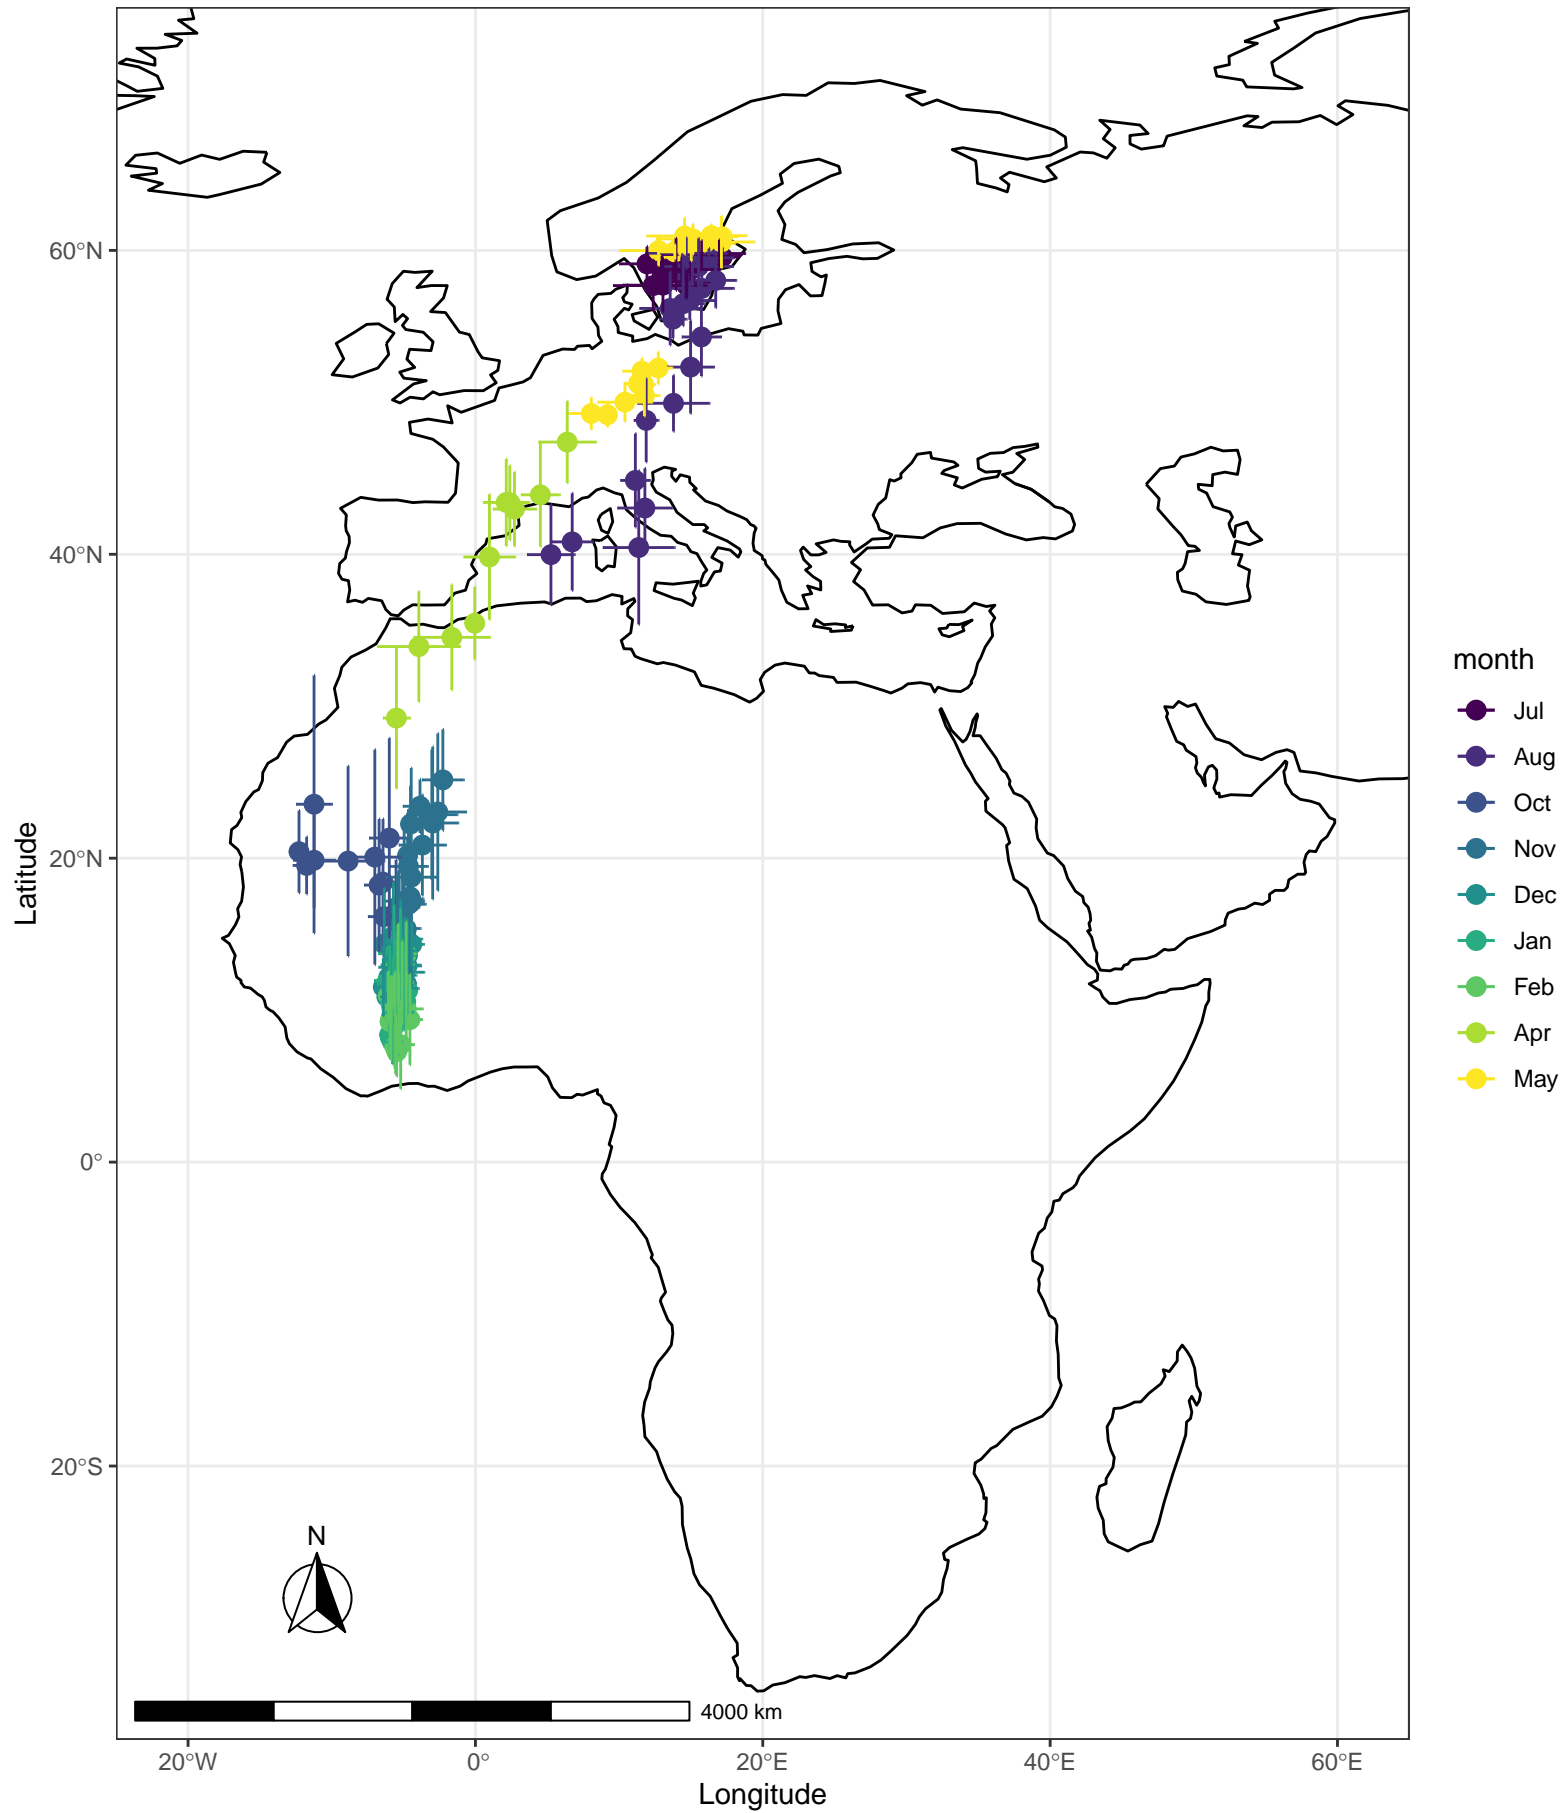

BM660

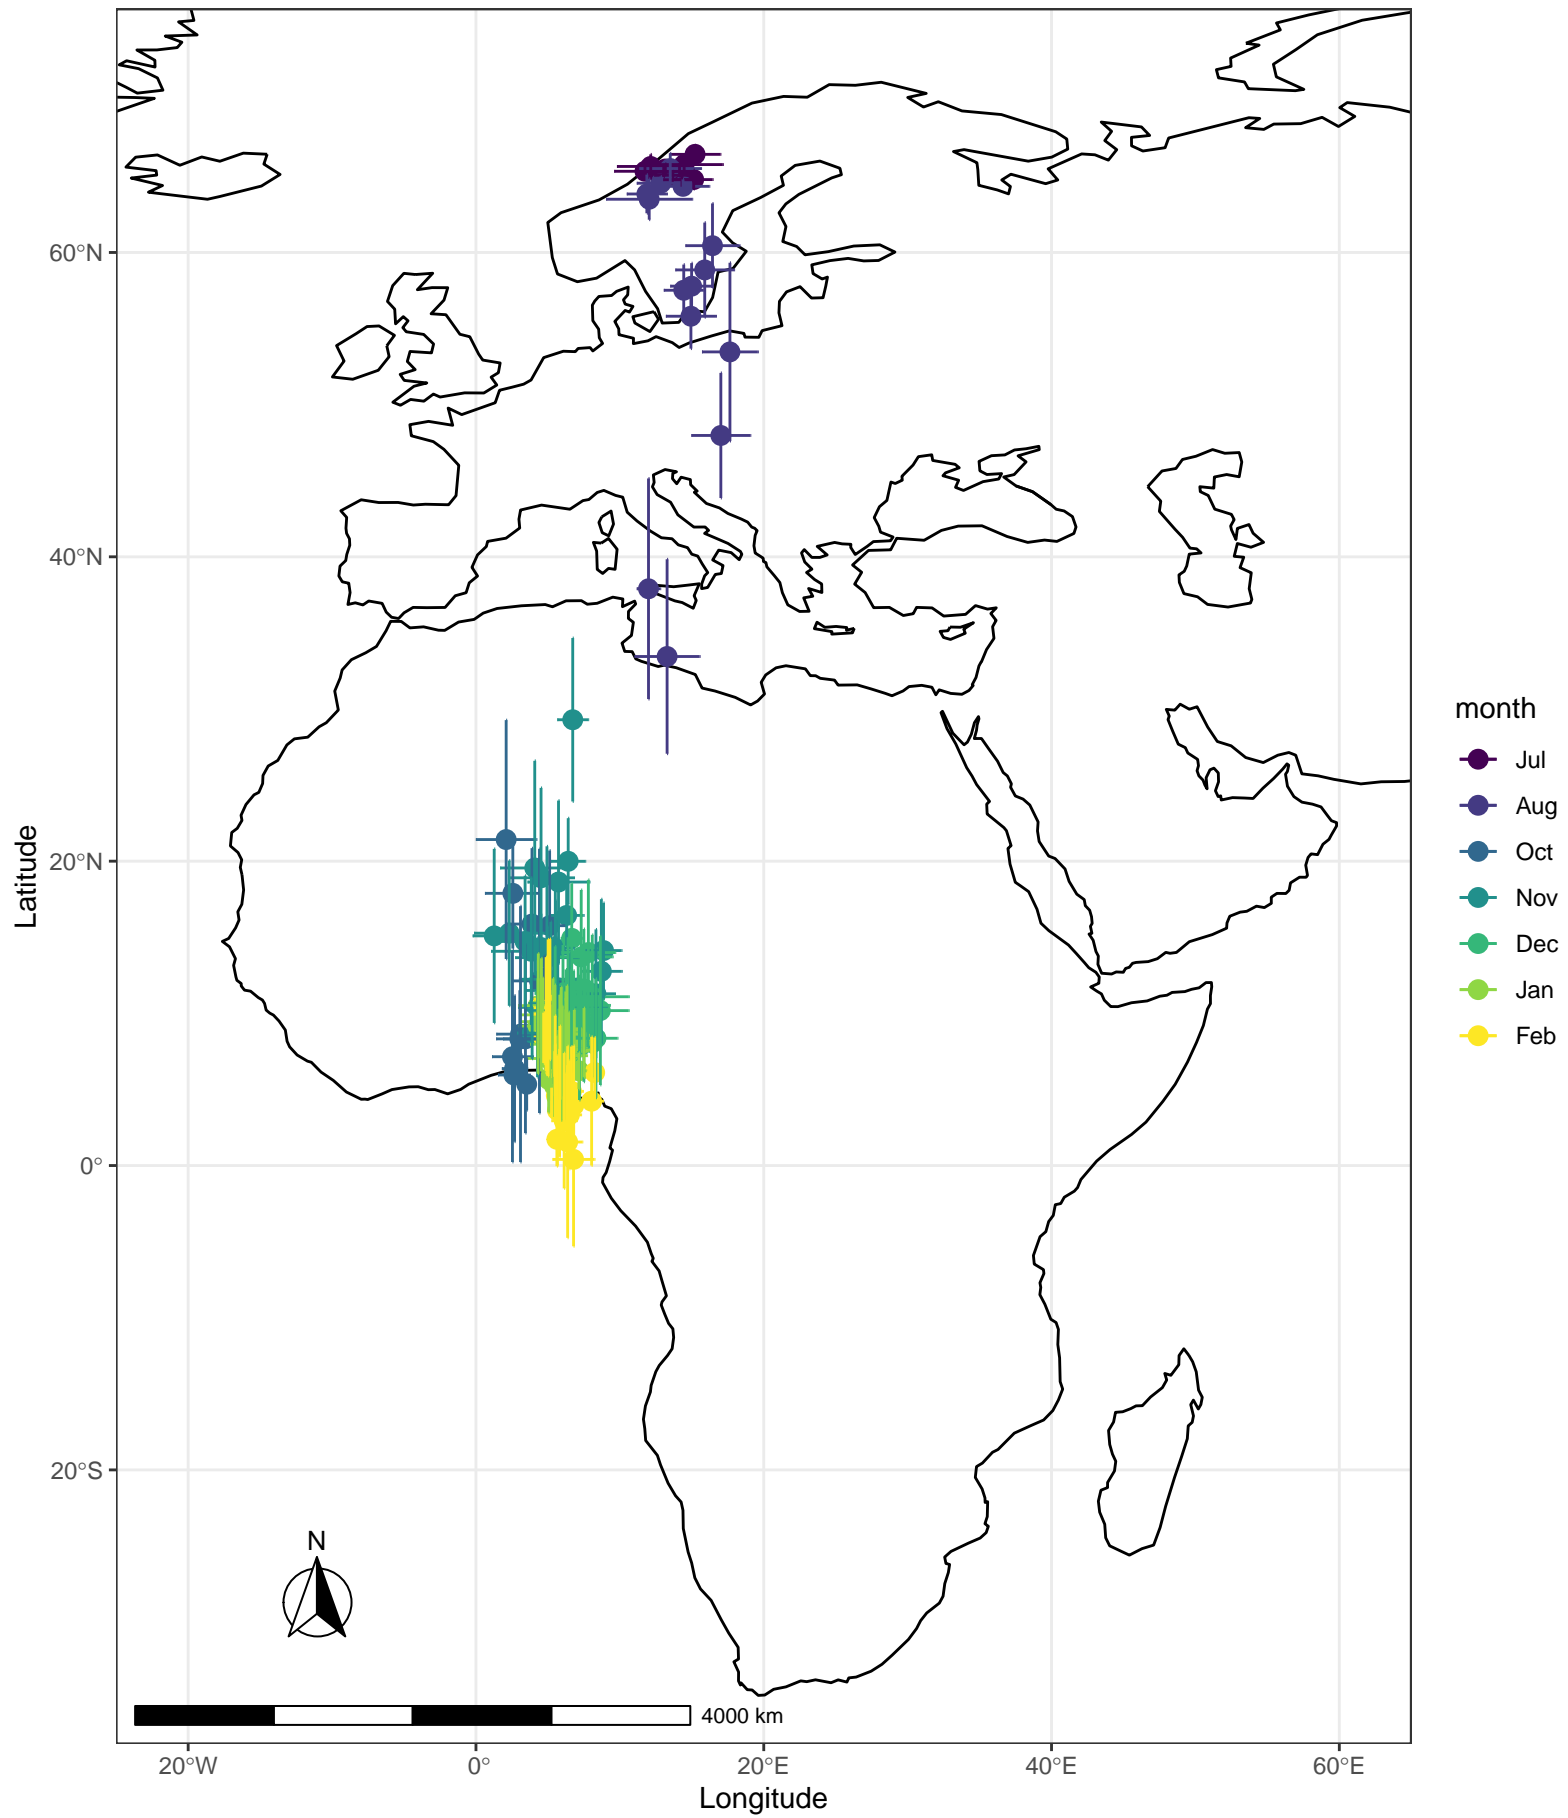

BM378

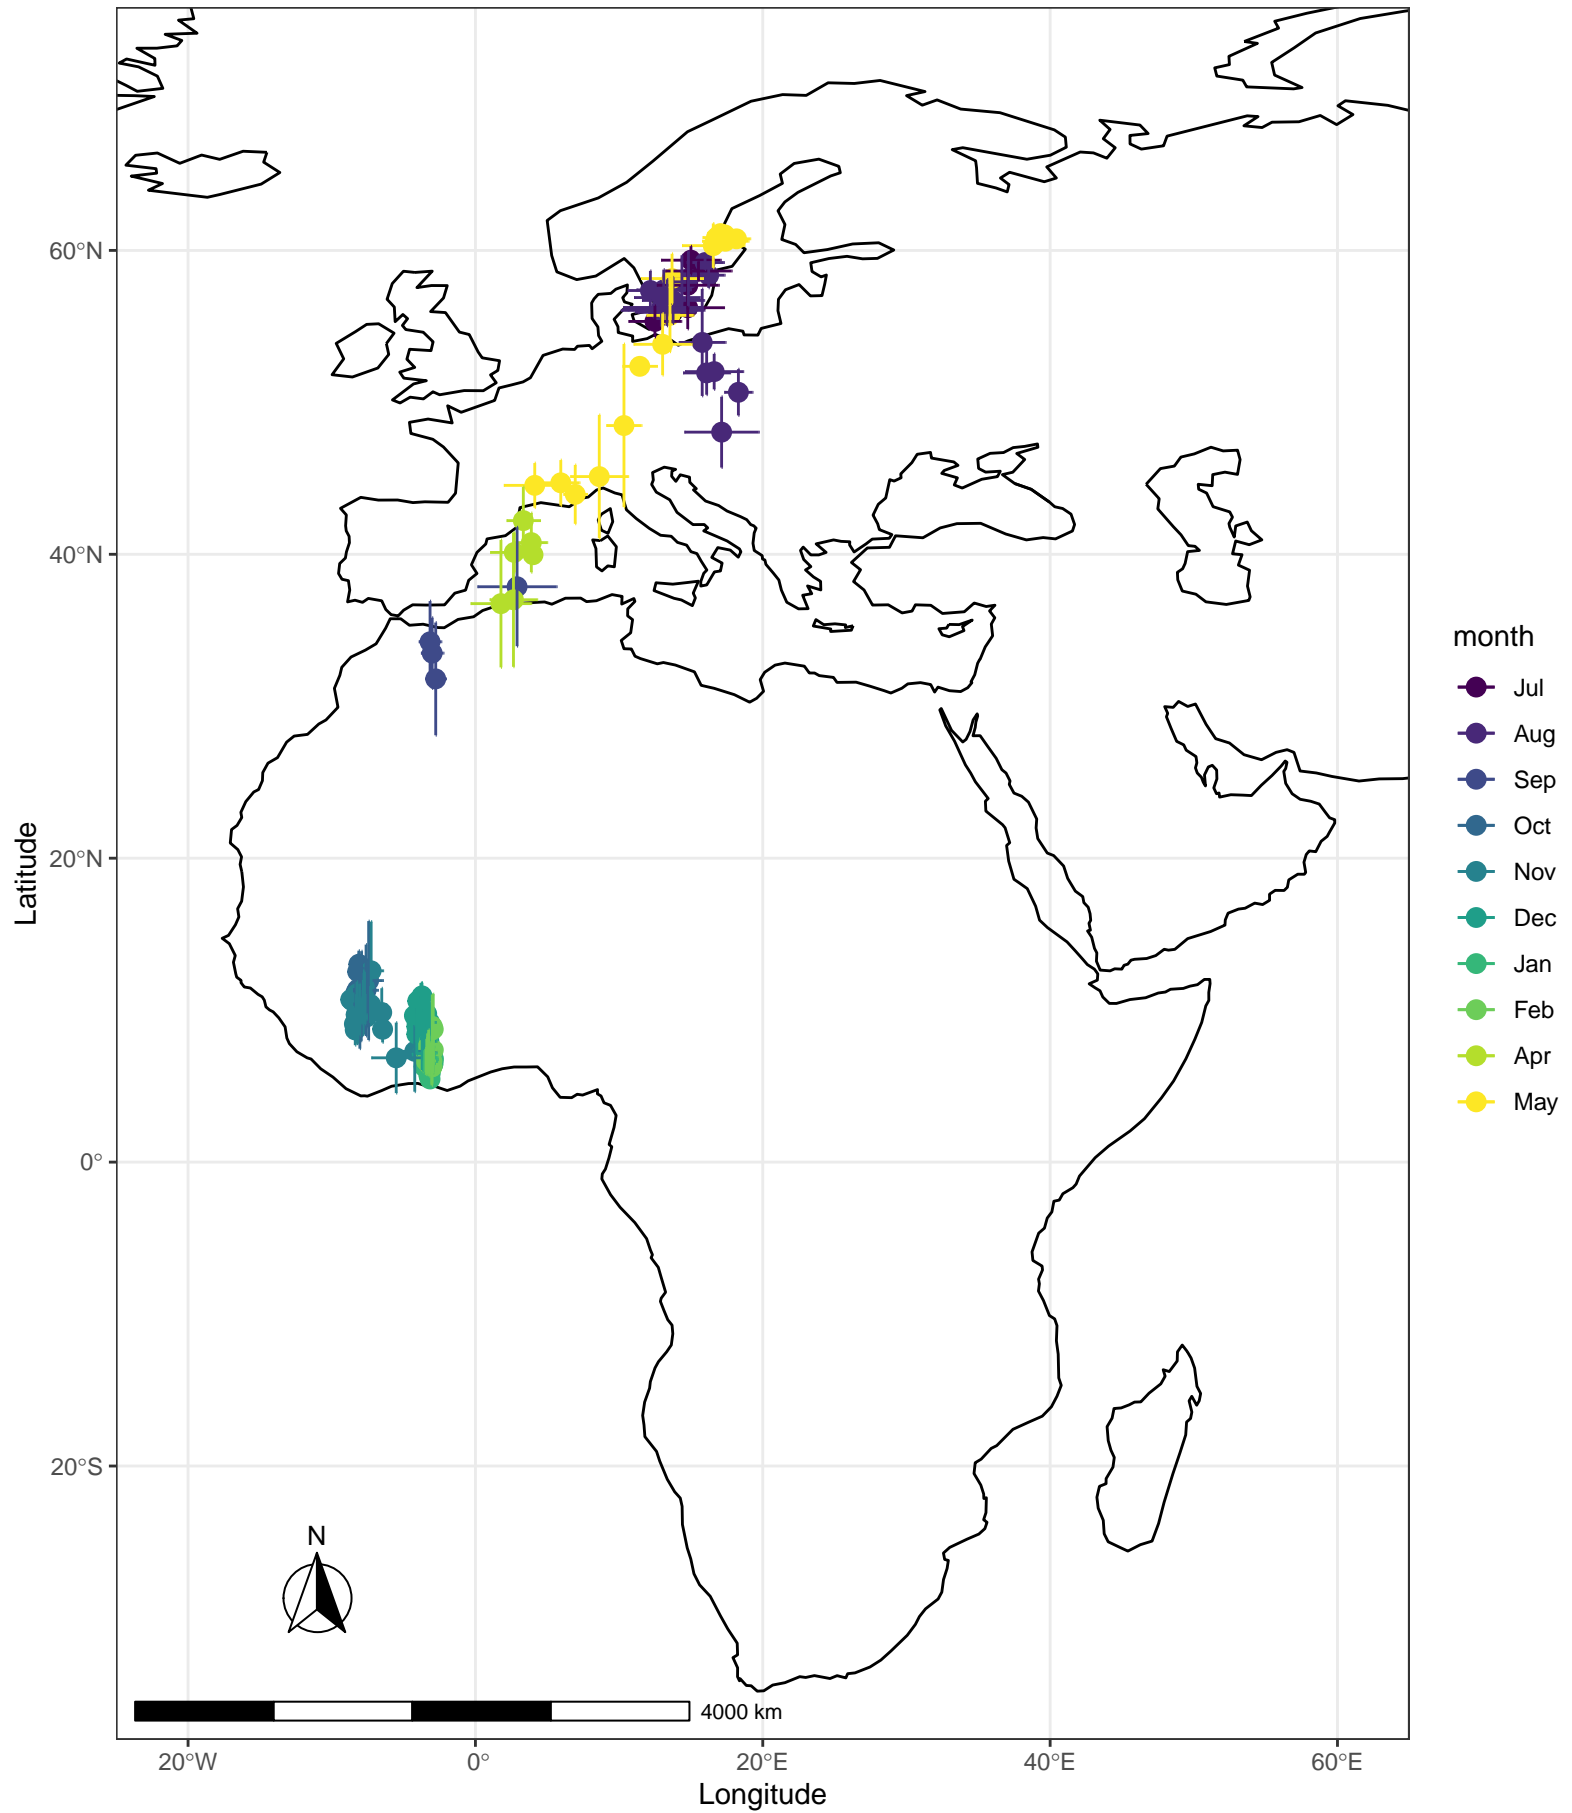

BM658

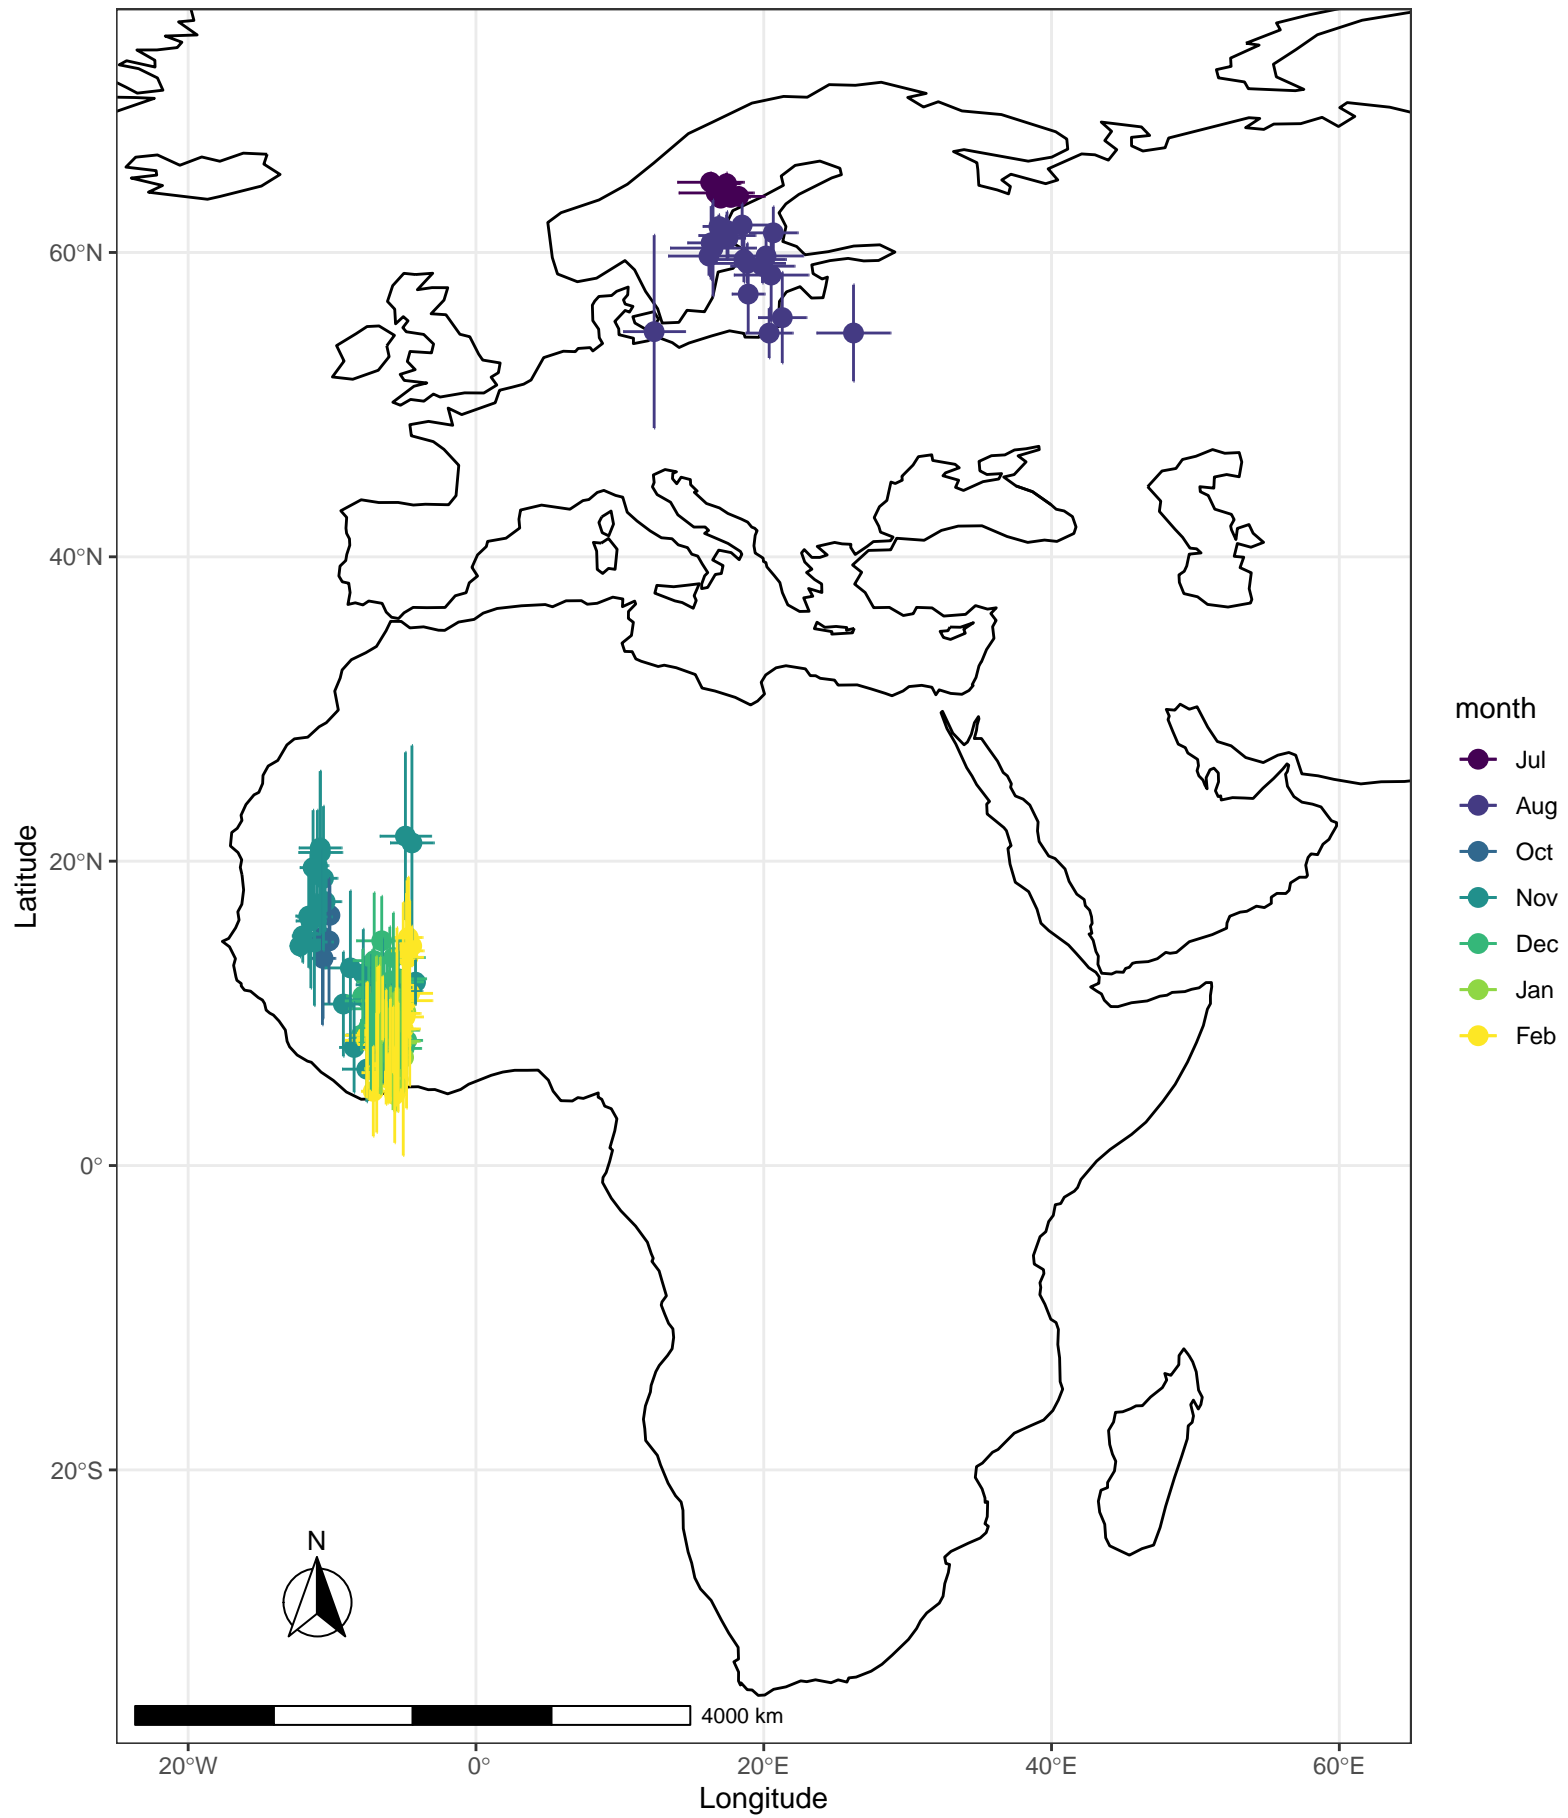

BM595

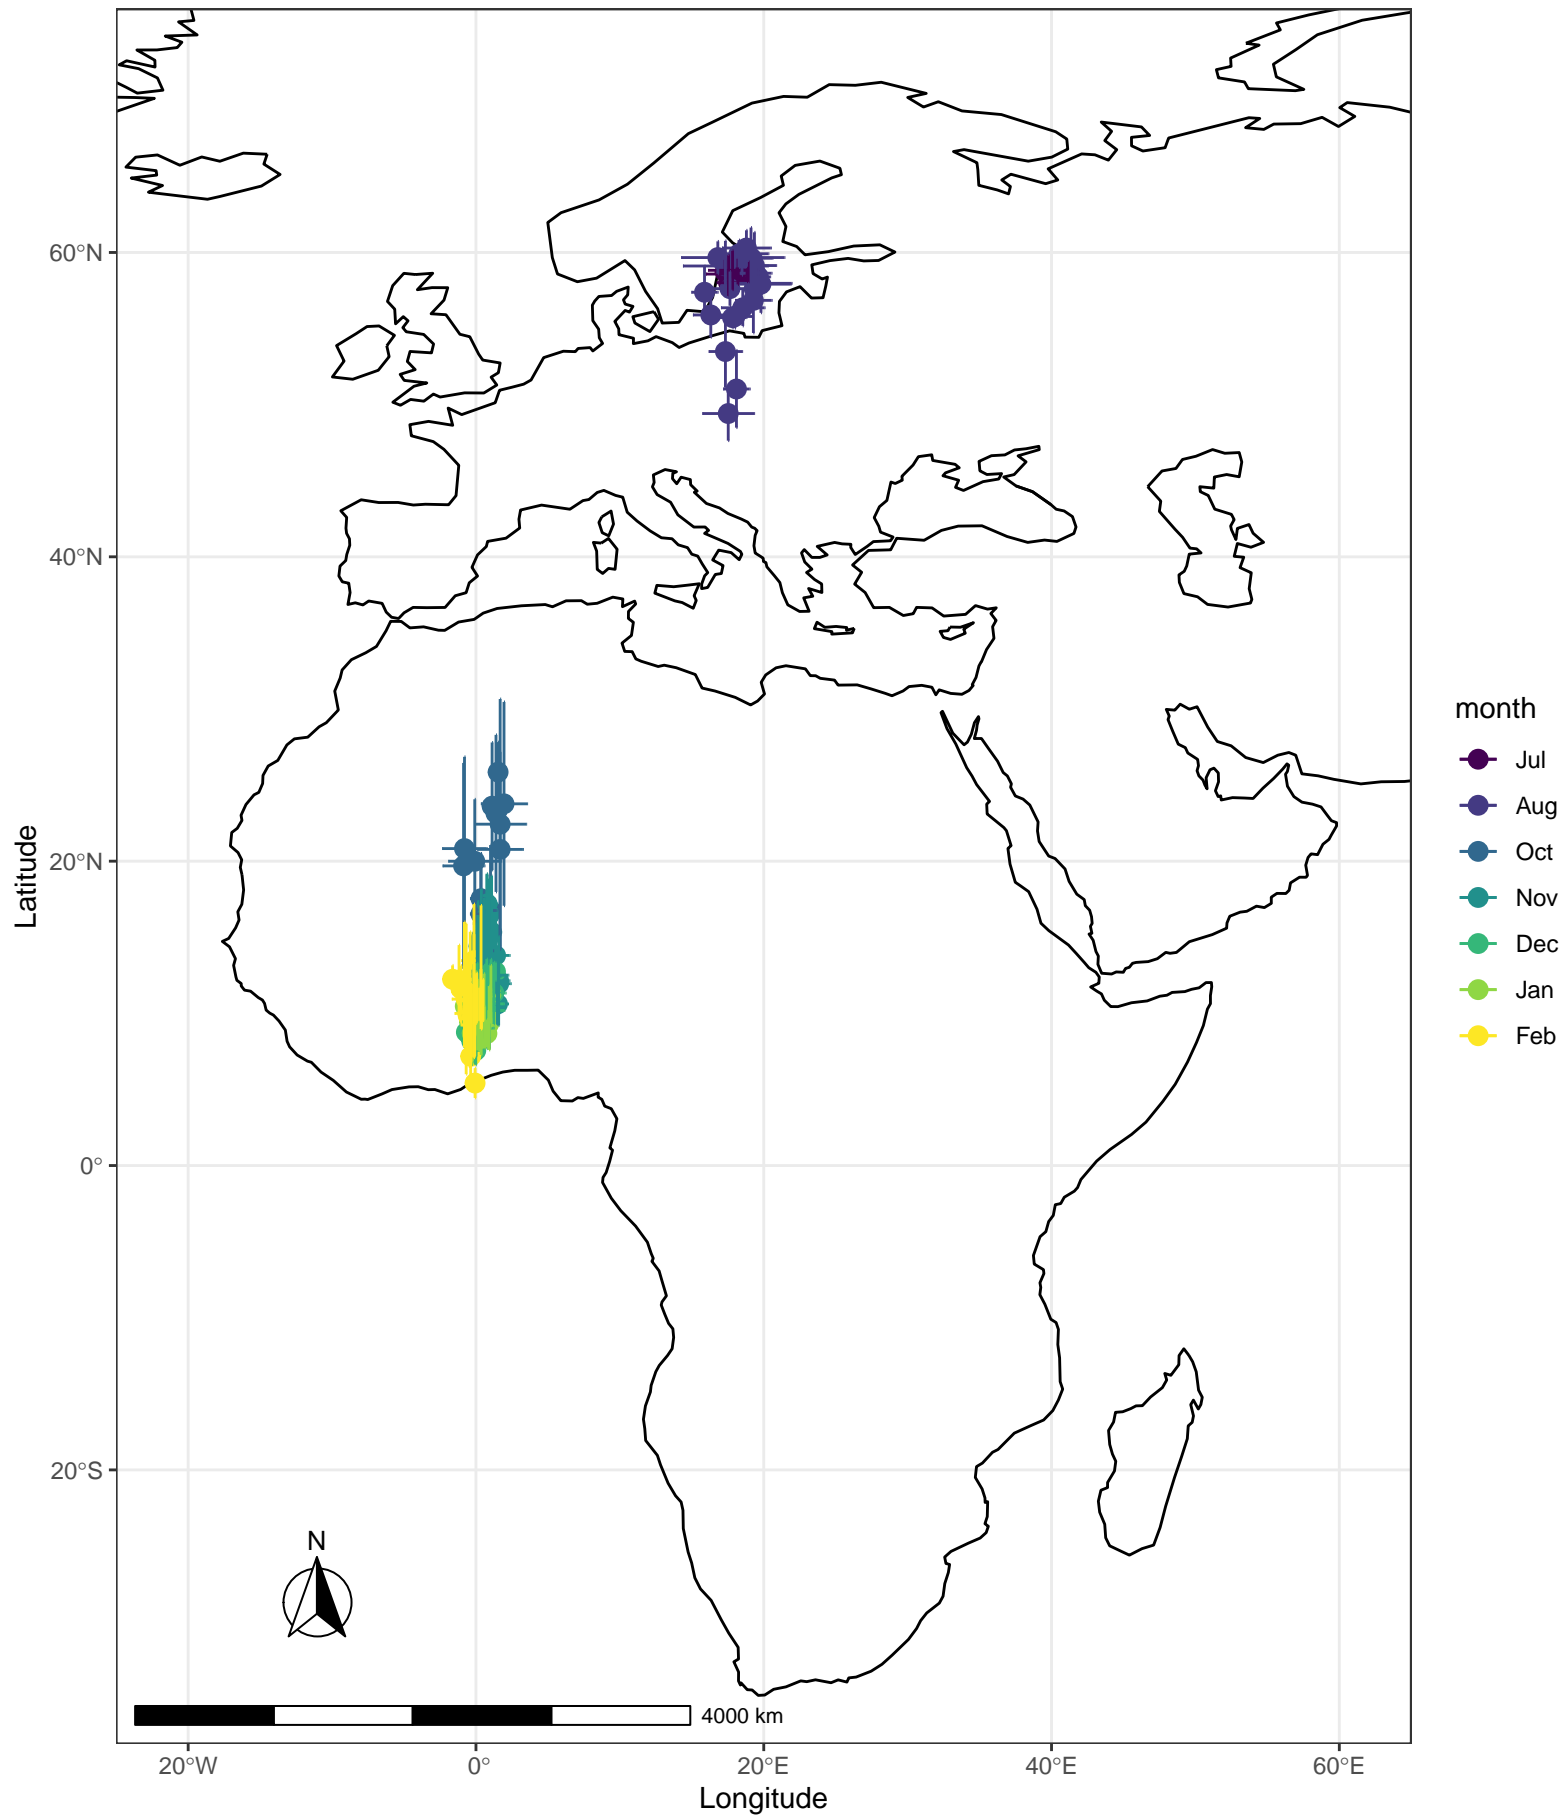

BM578

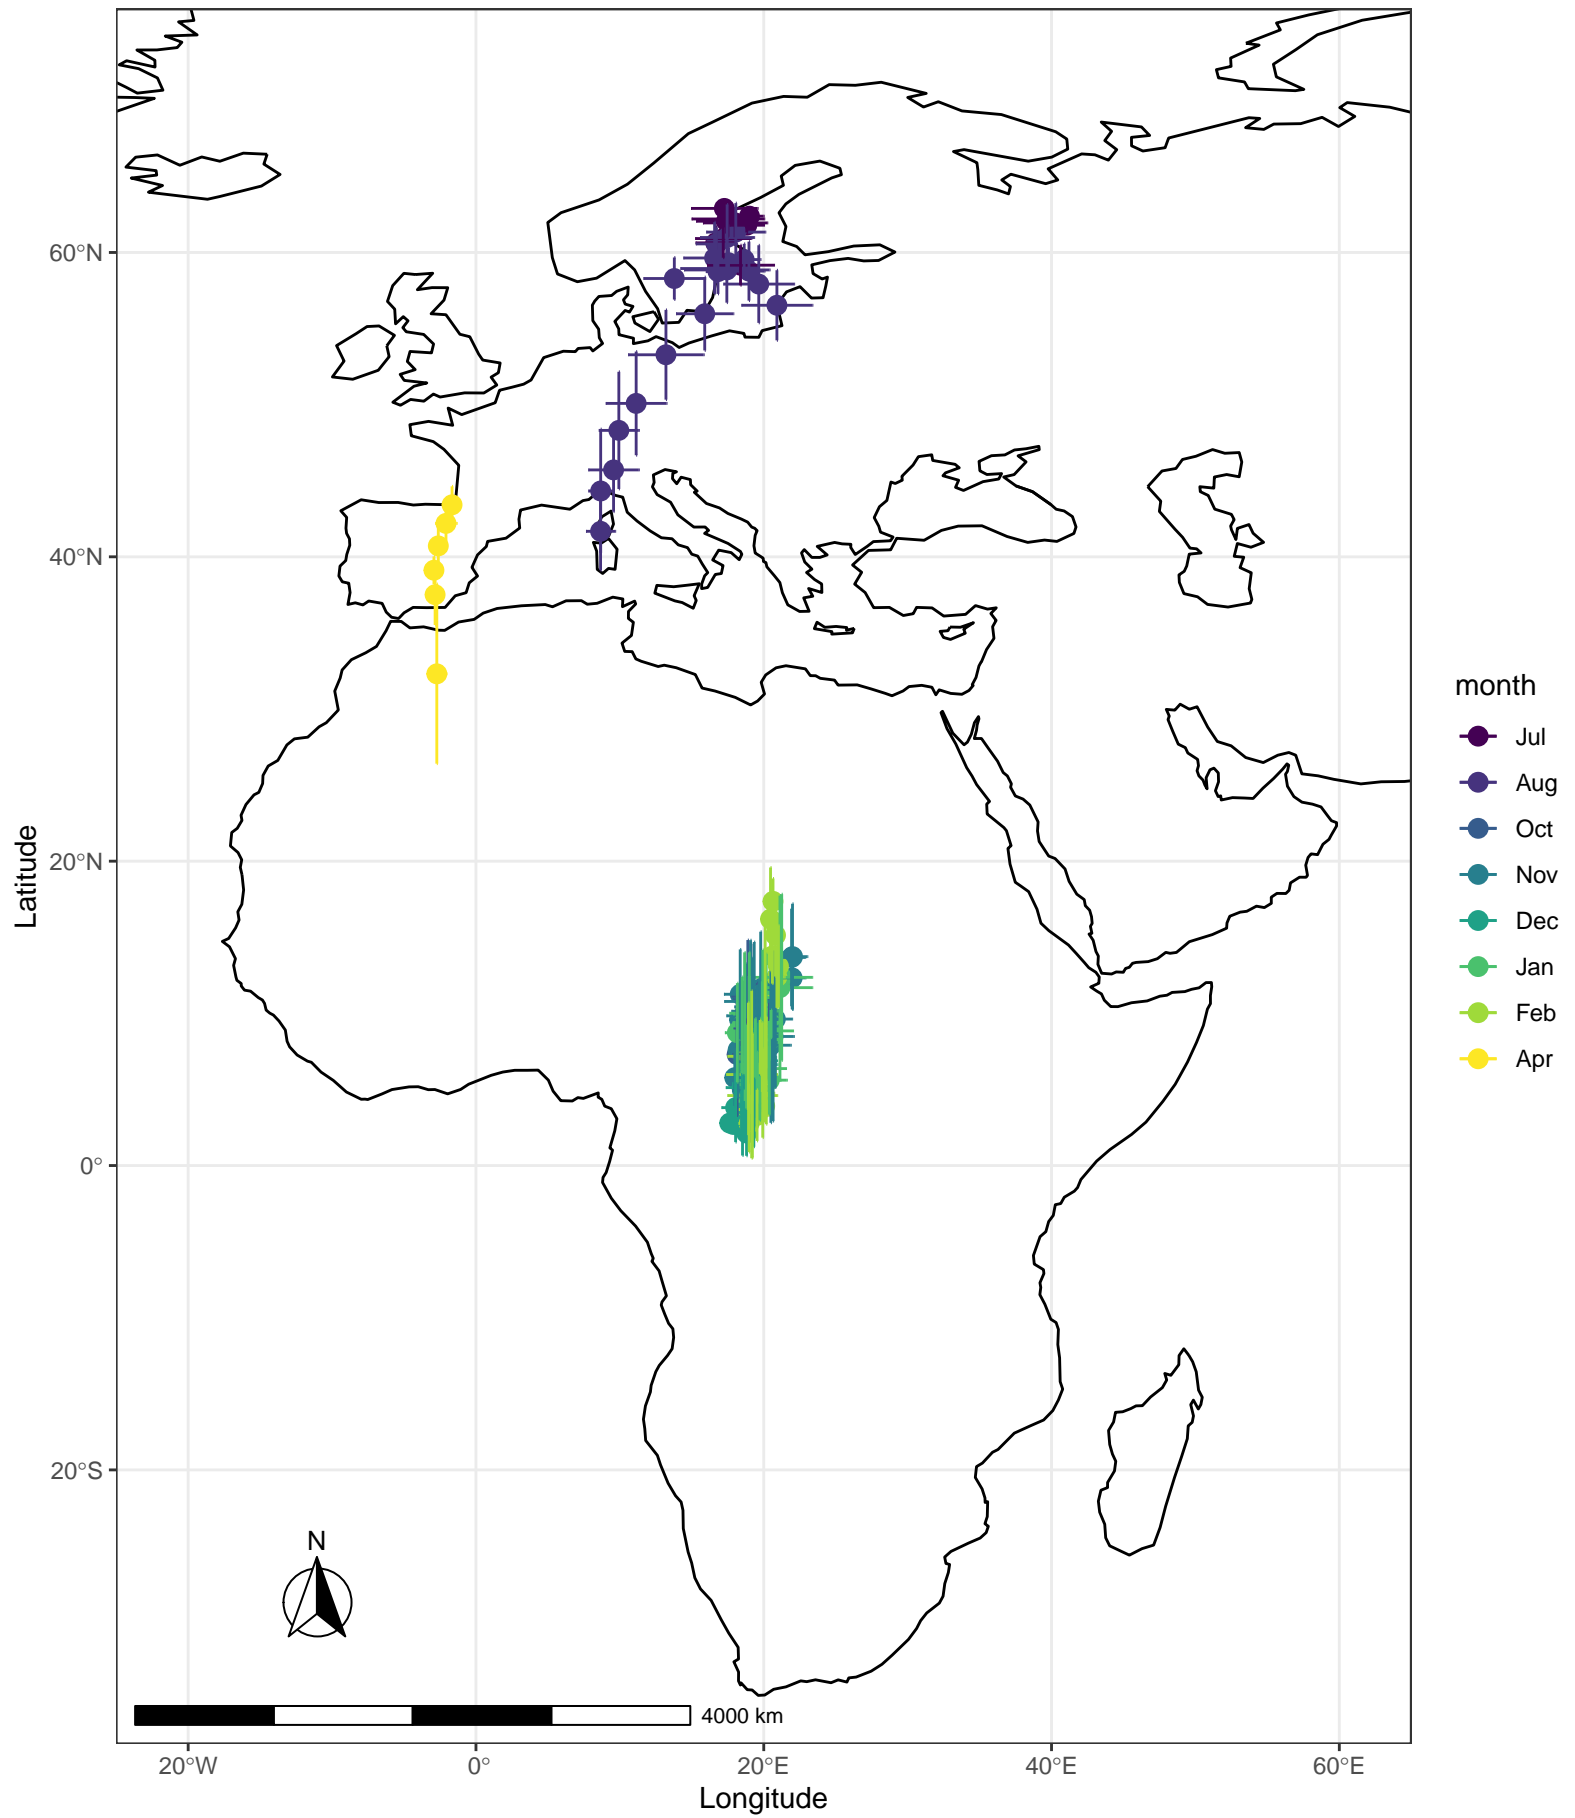



BM553

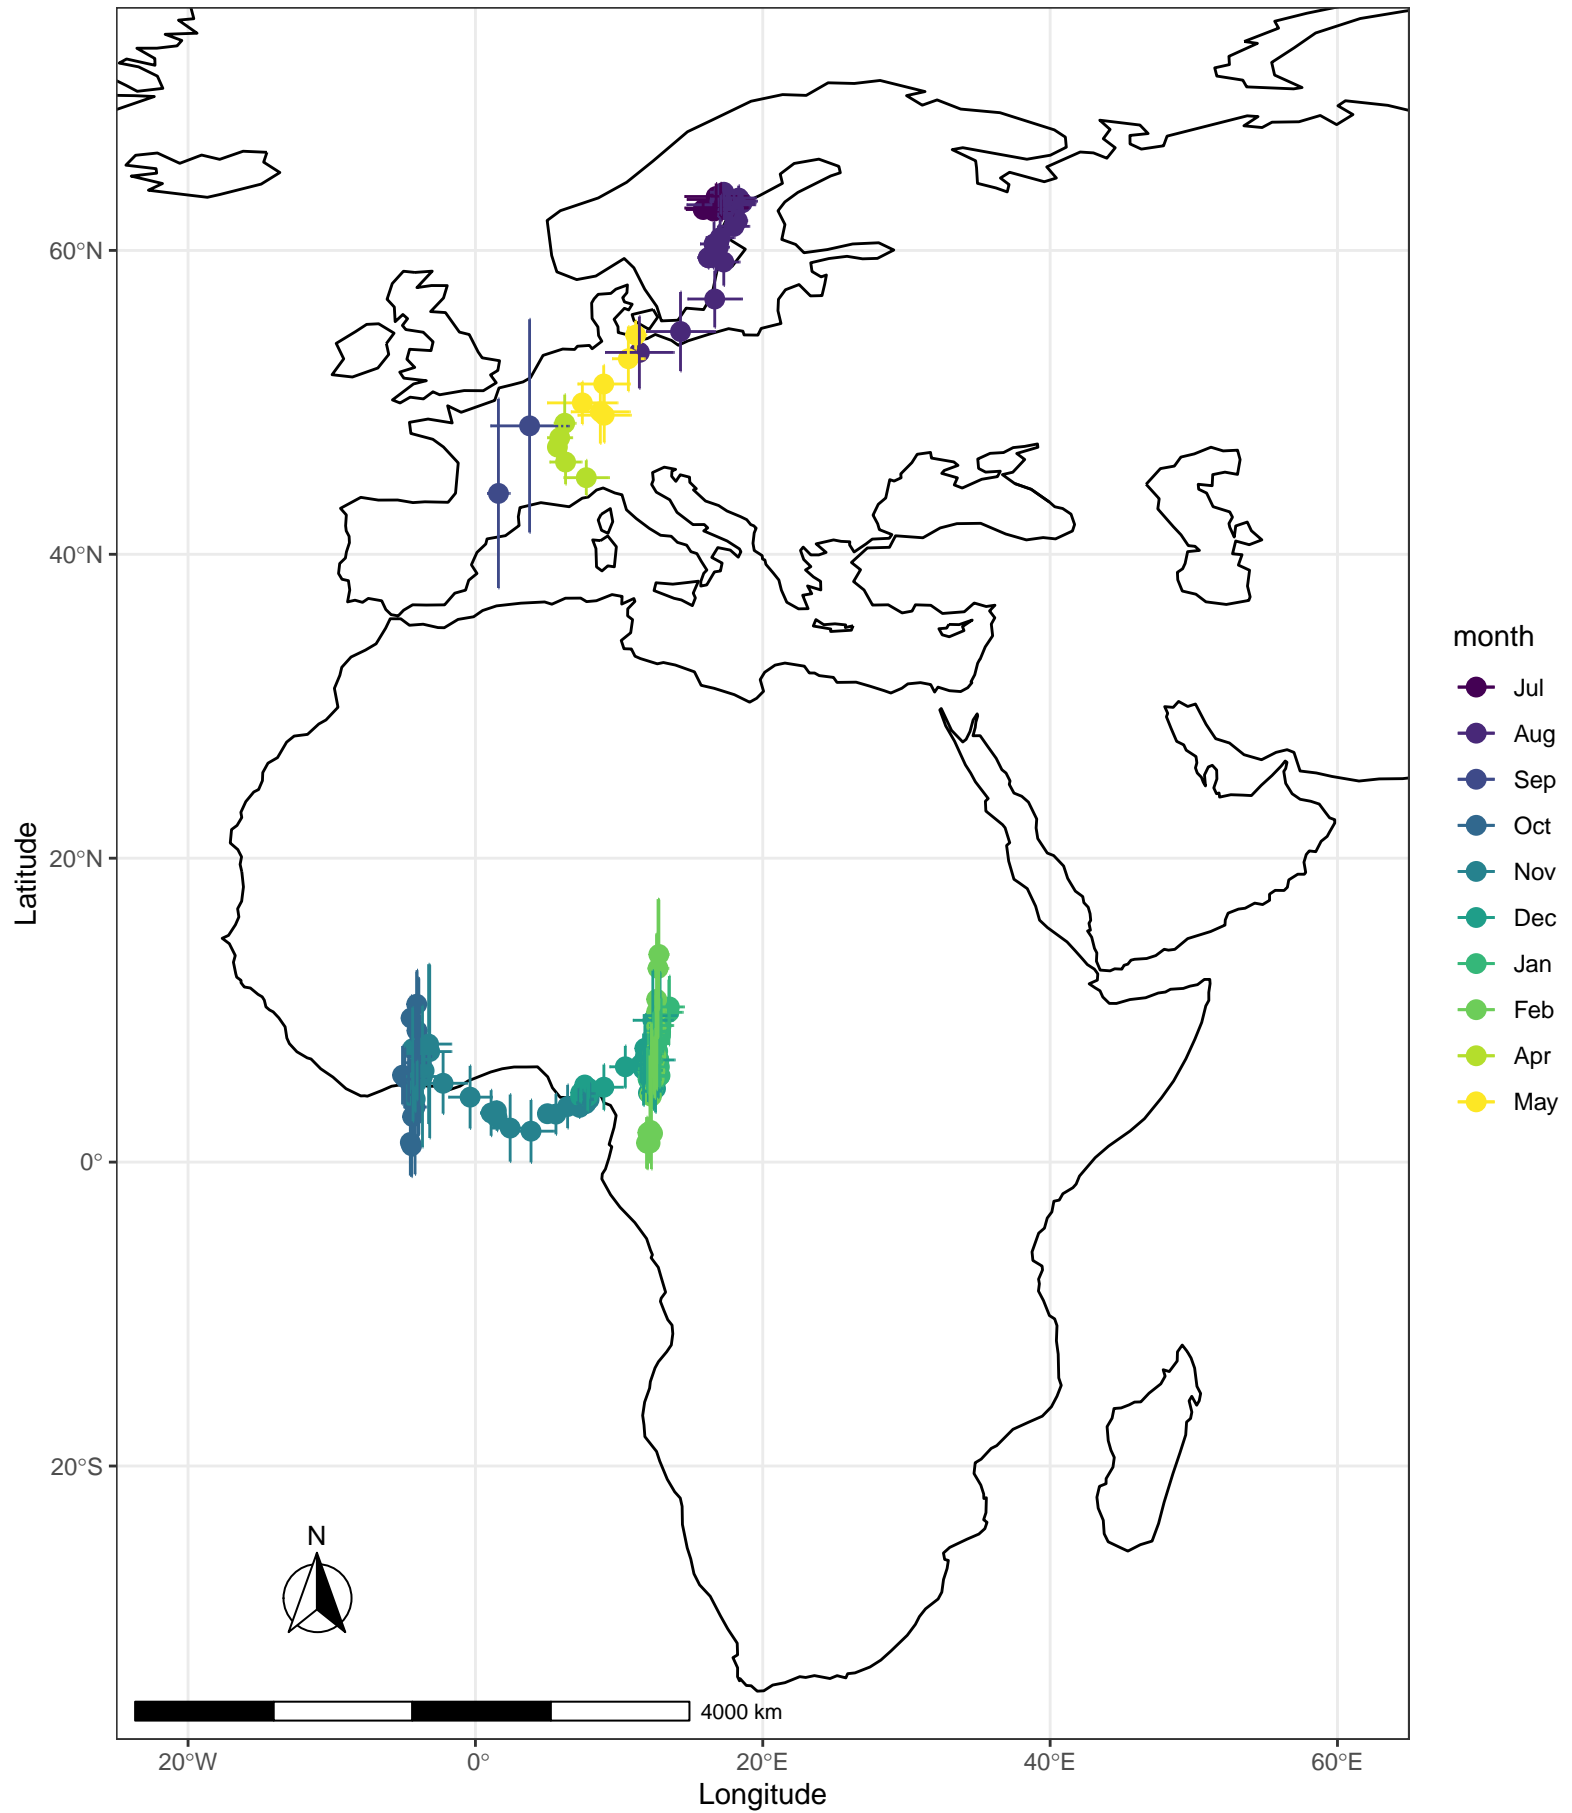

BM559

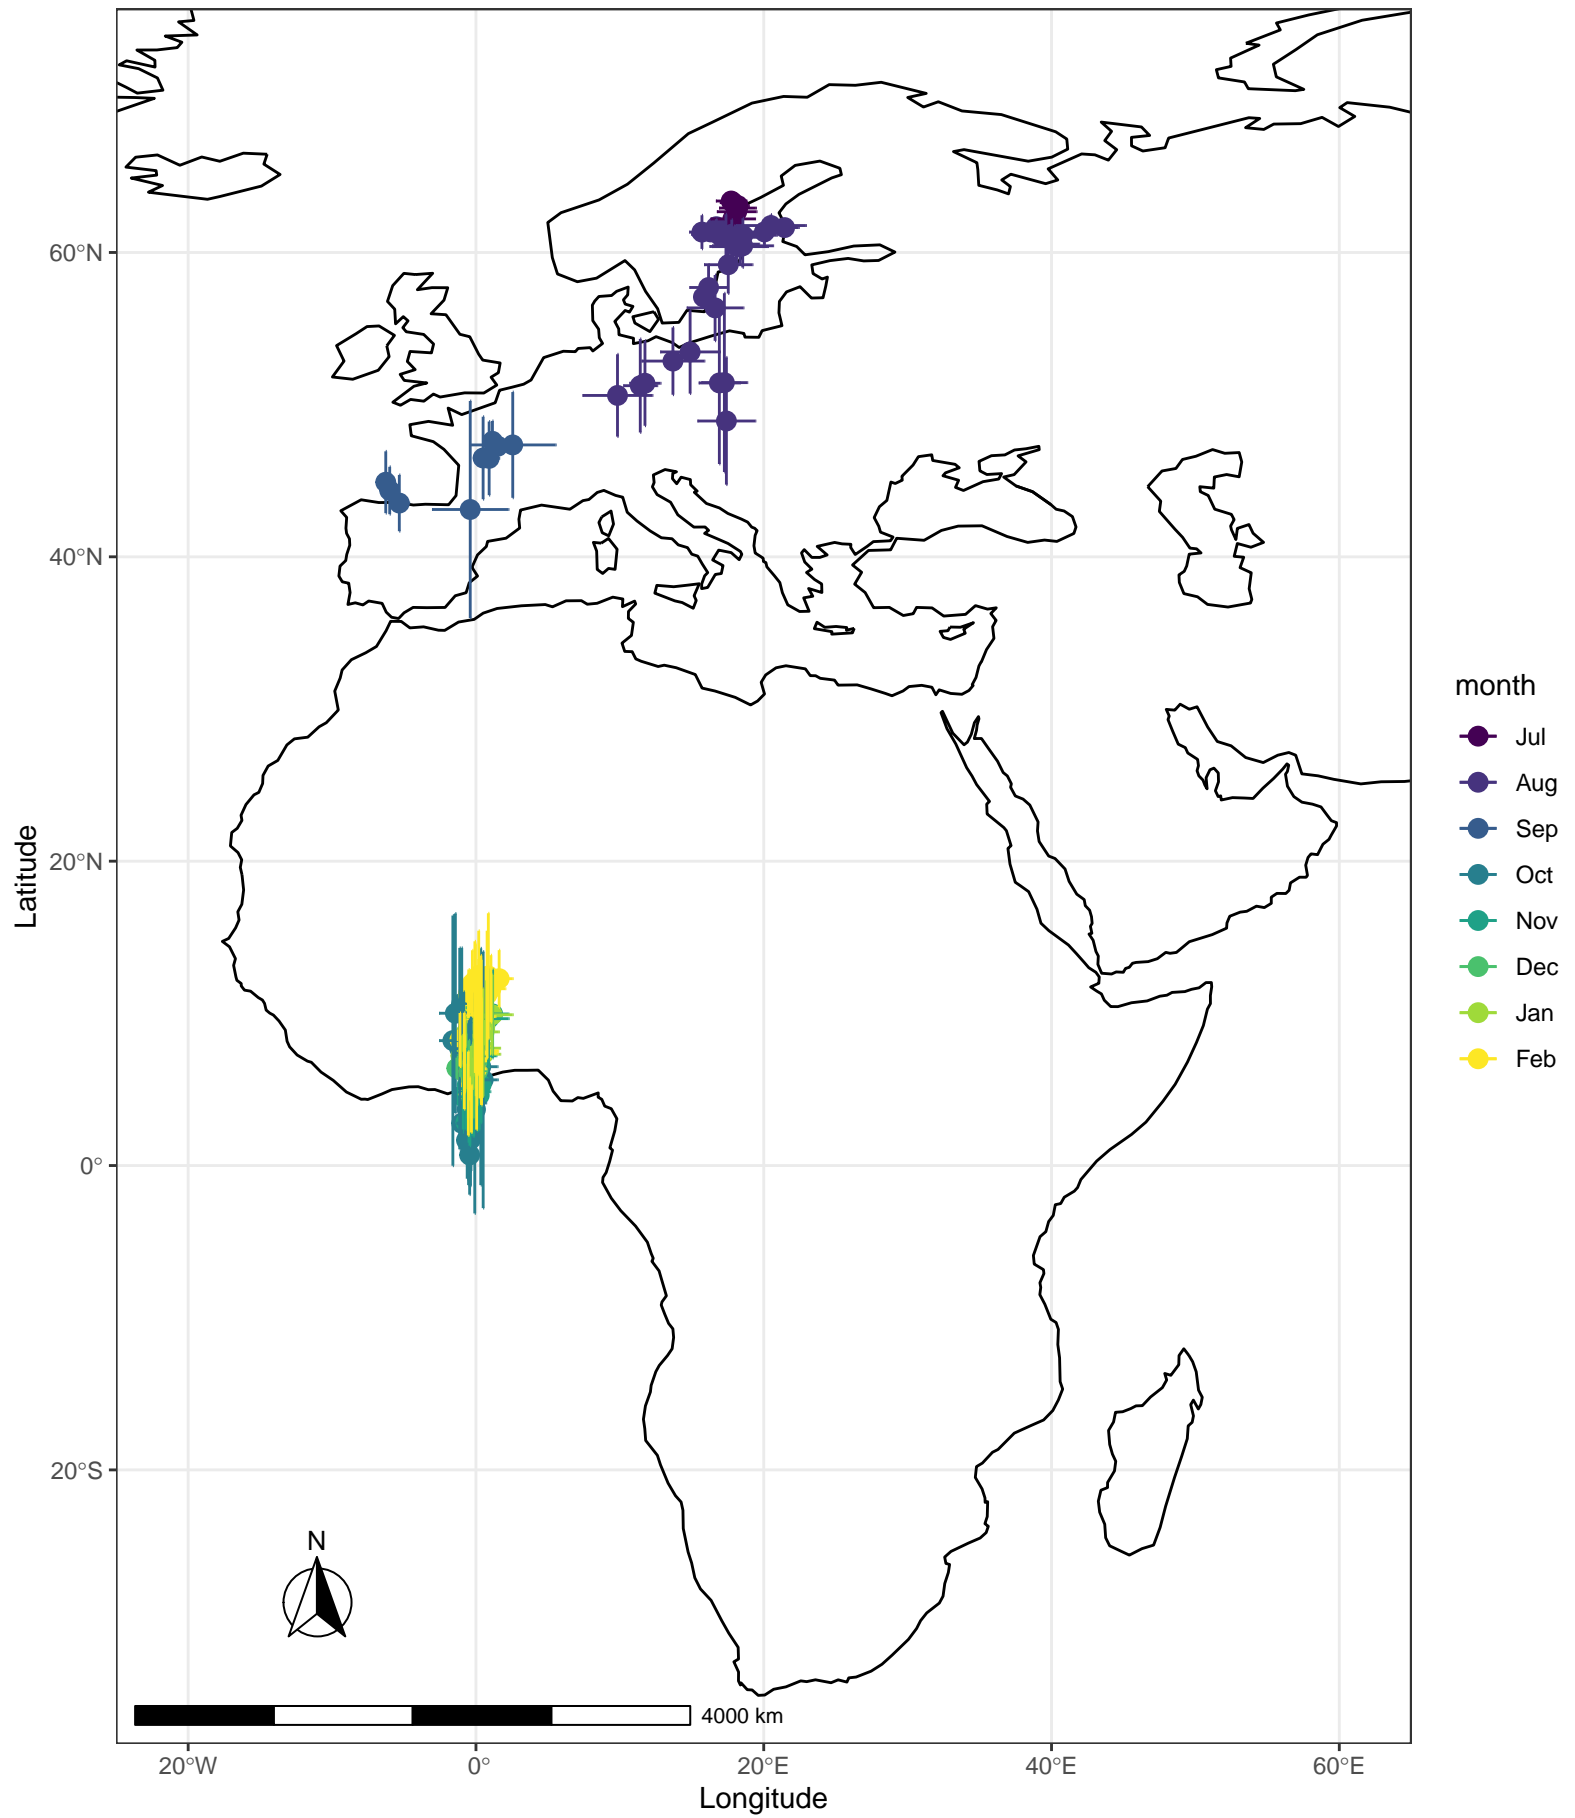

BM399

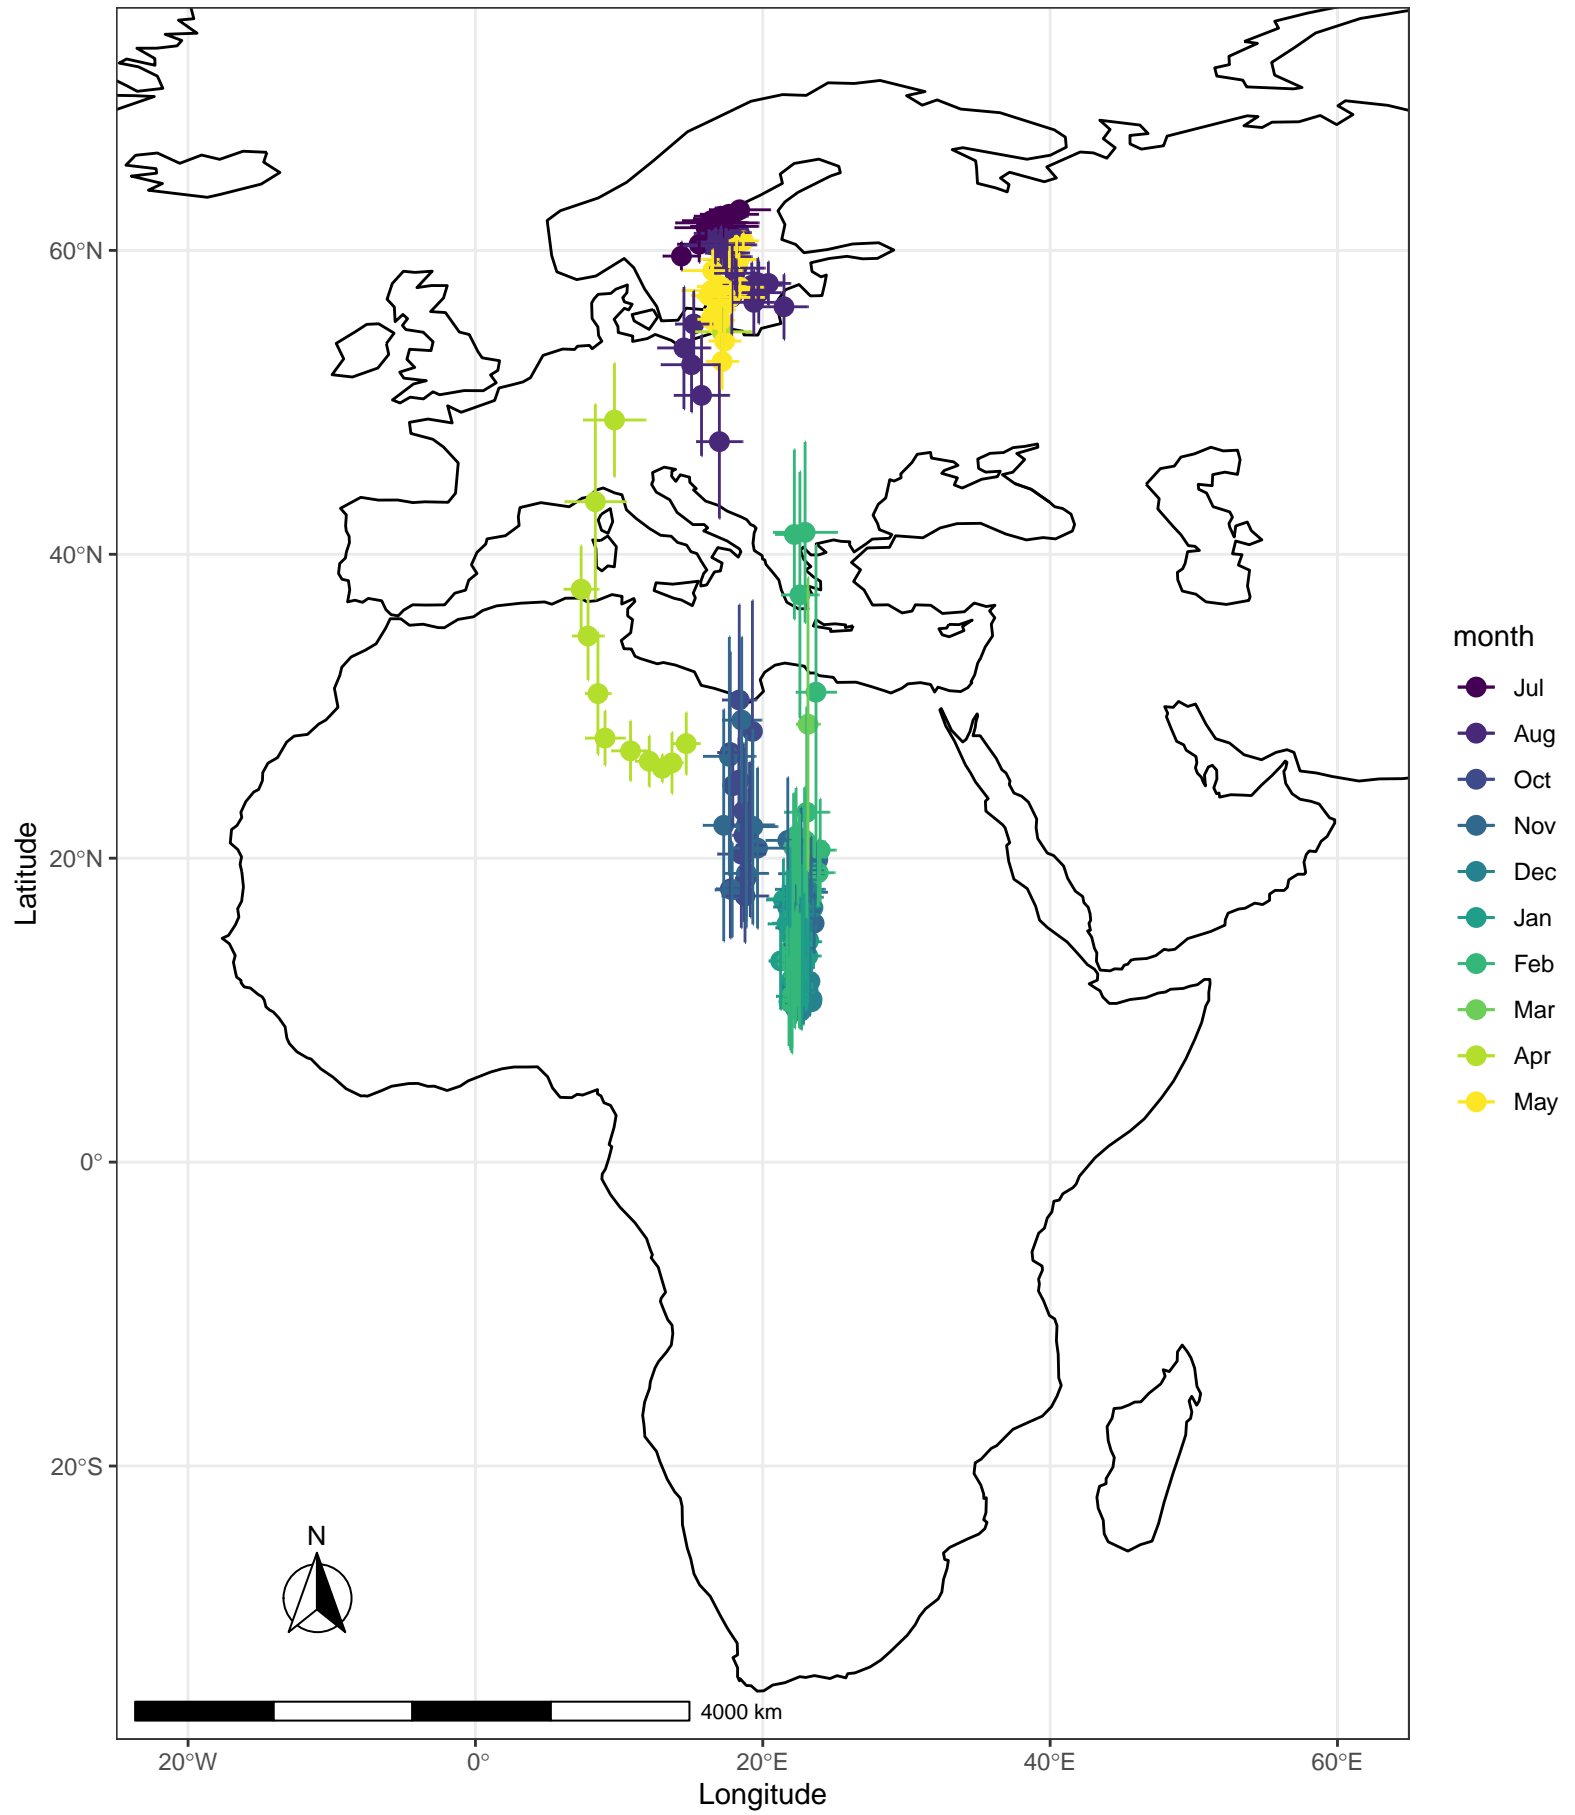

BM648

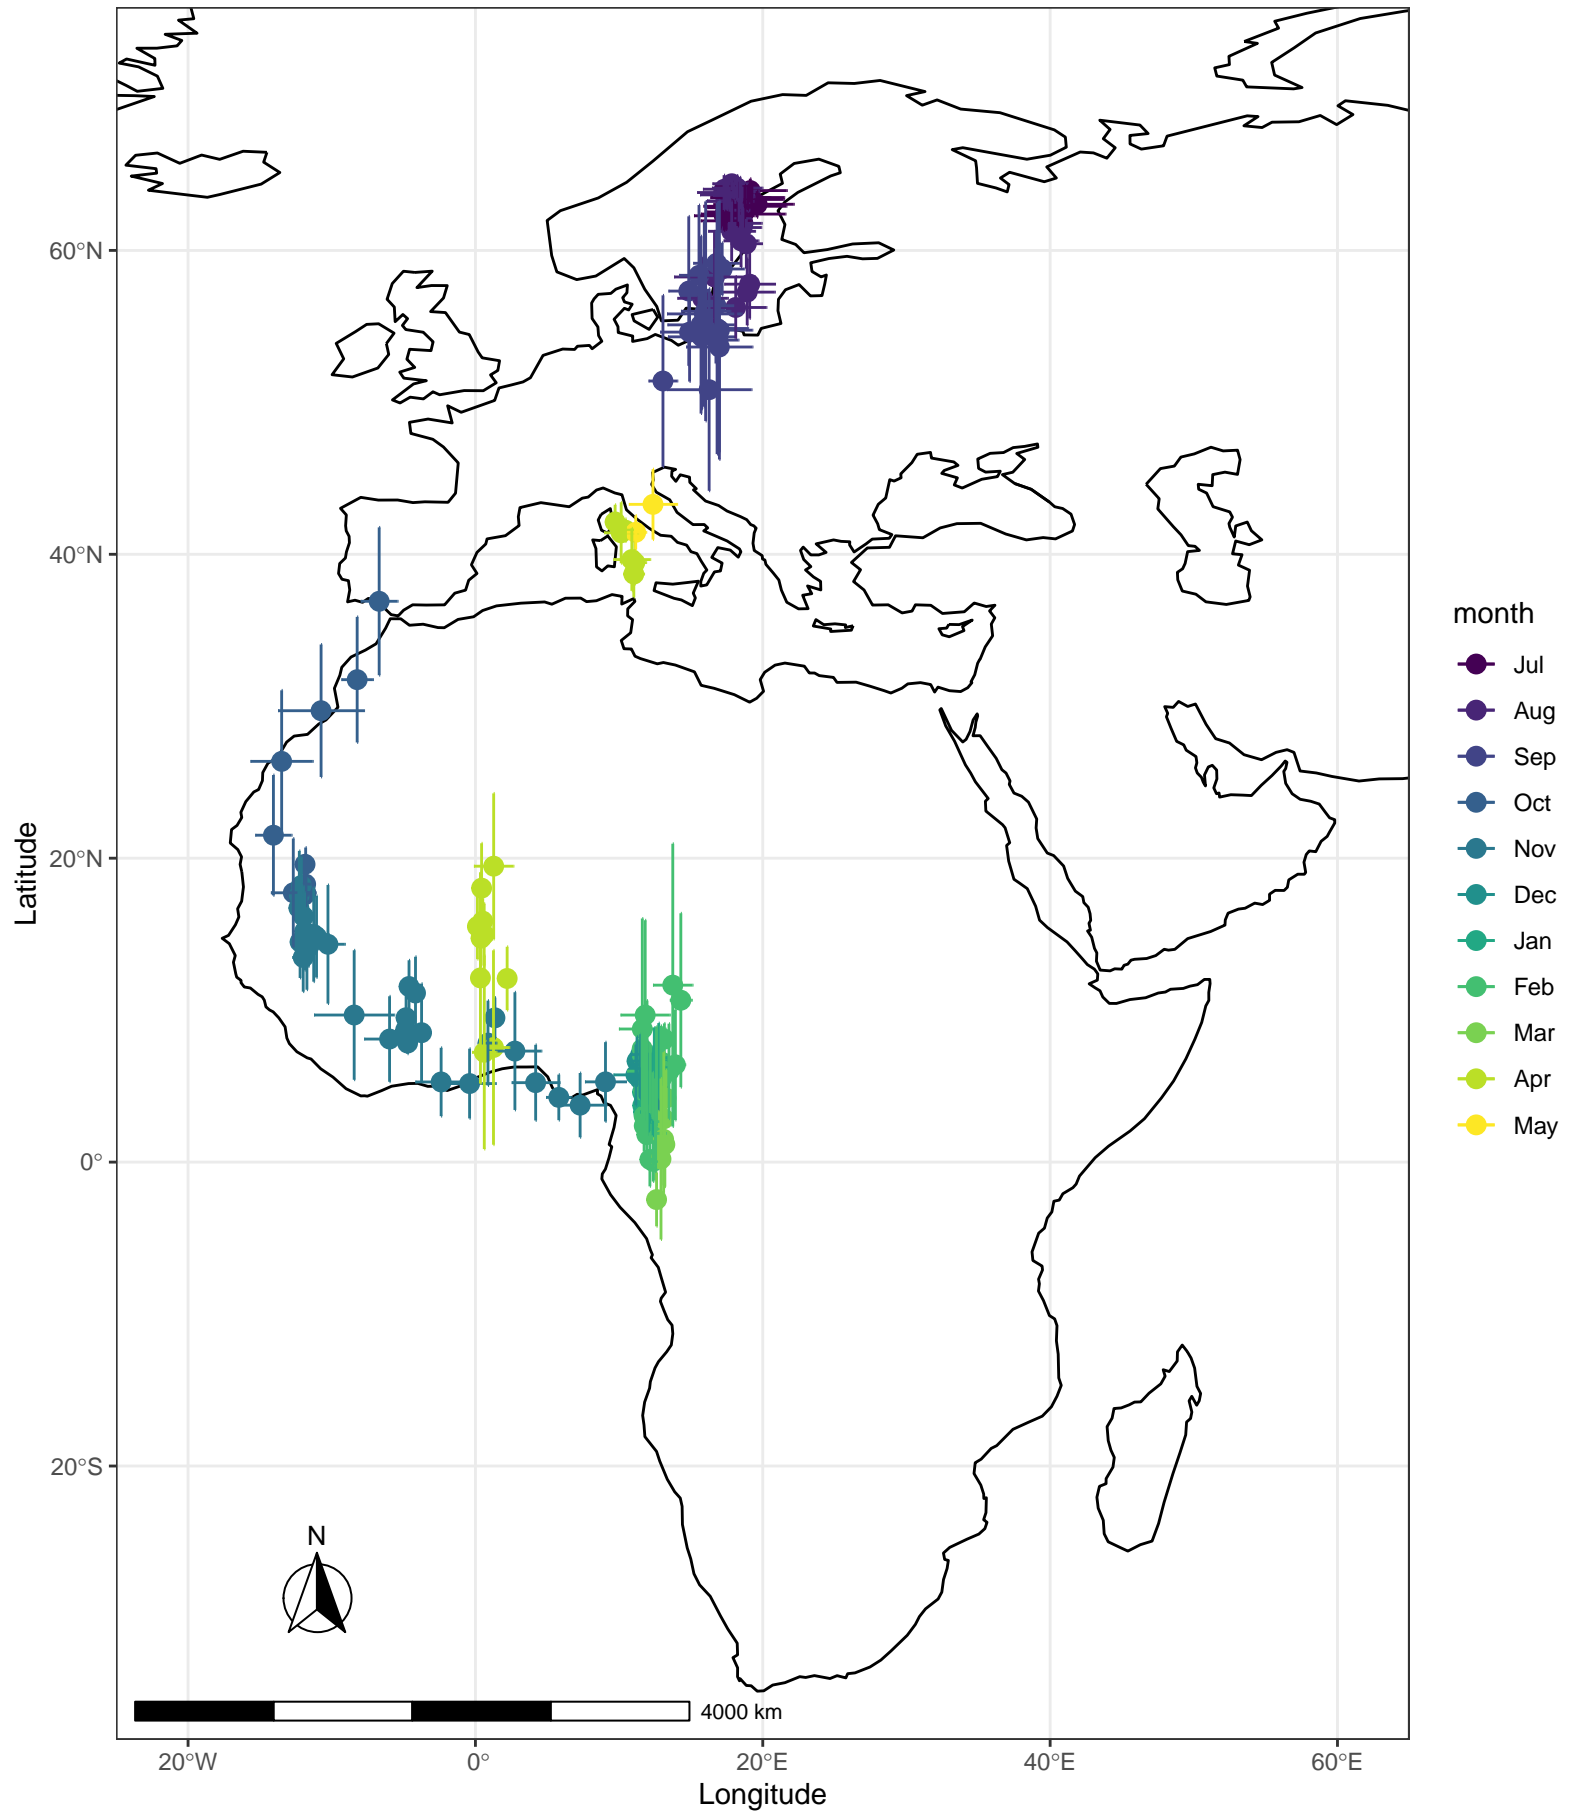

BM256

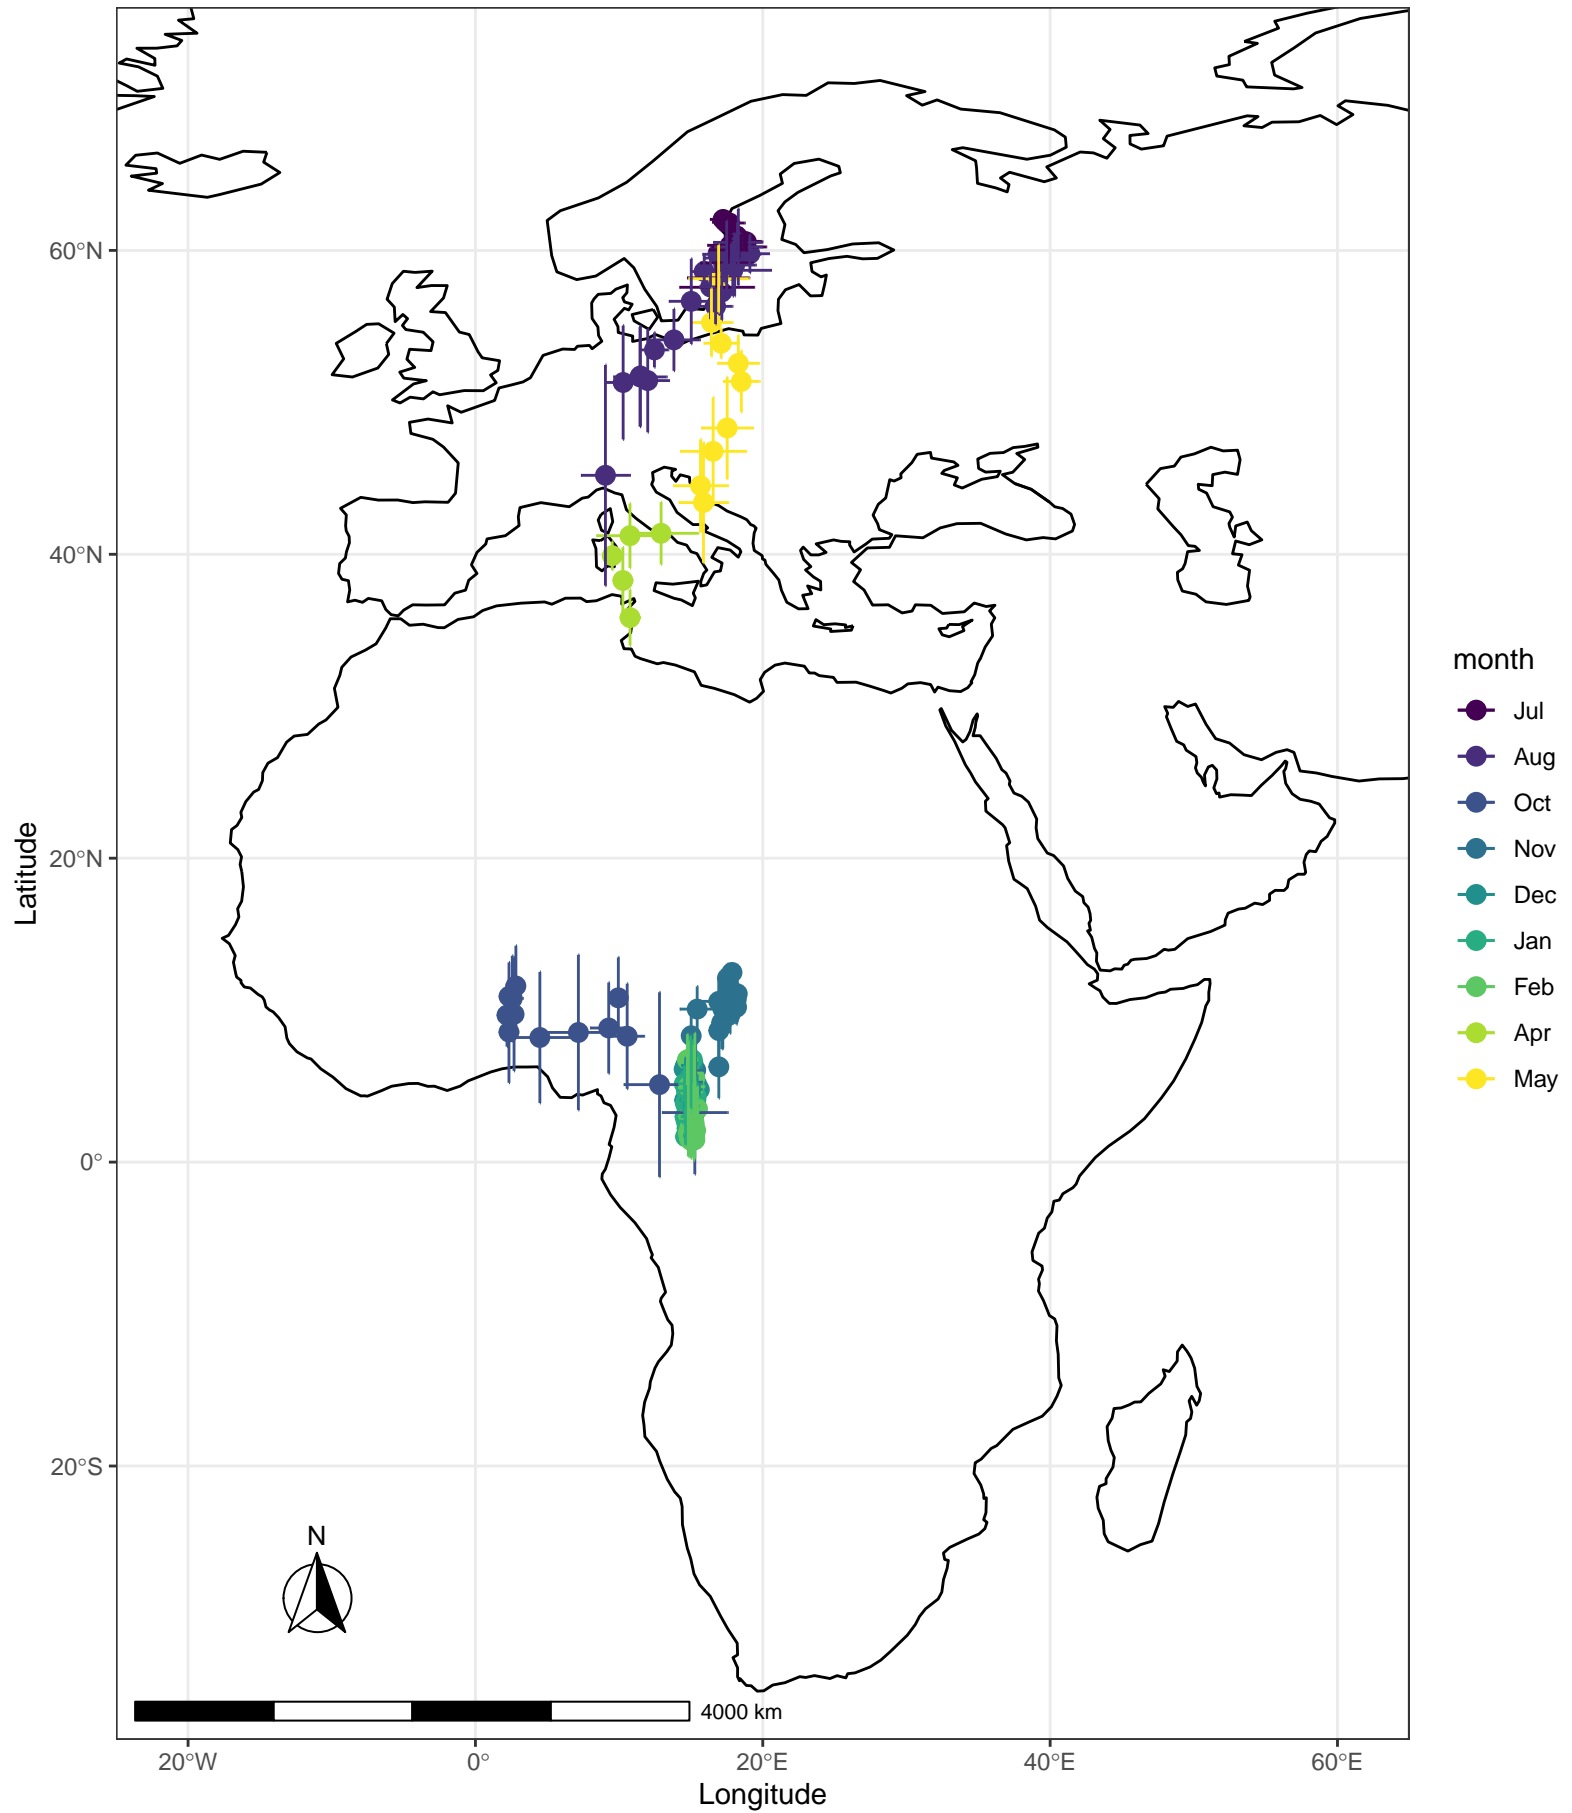

BN889

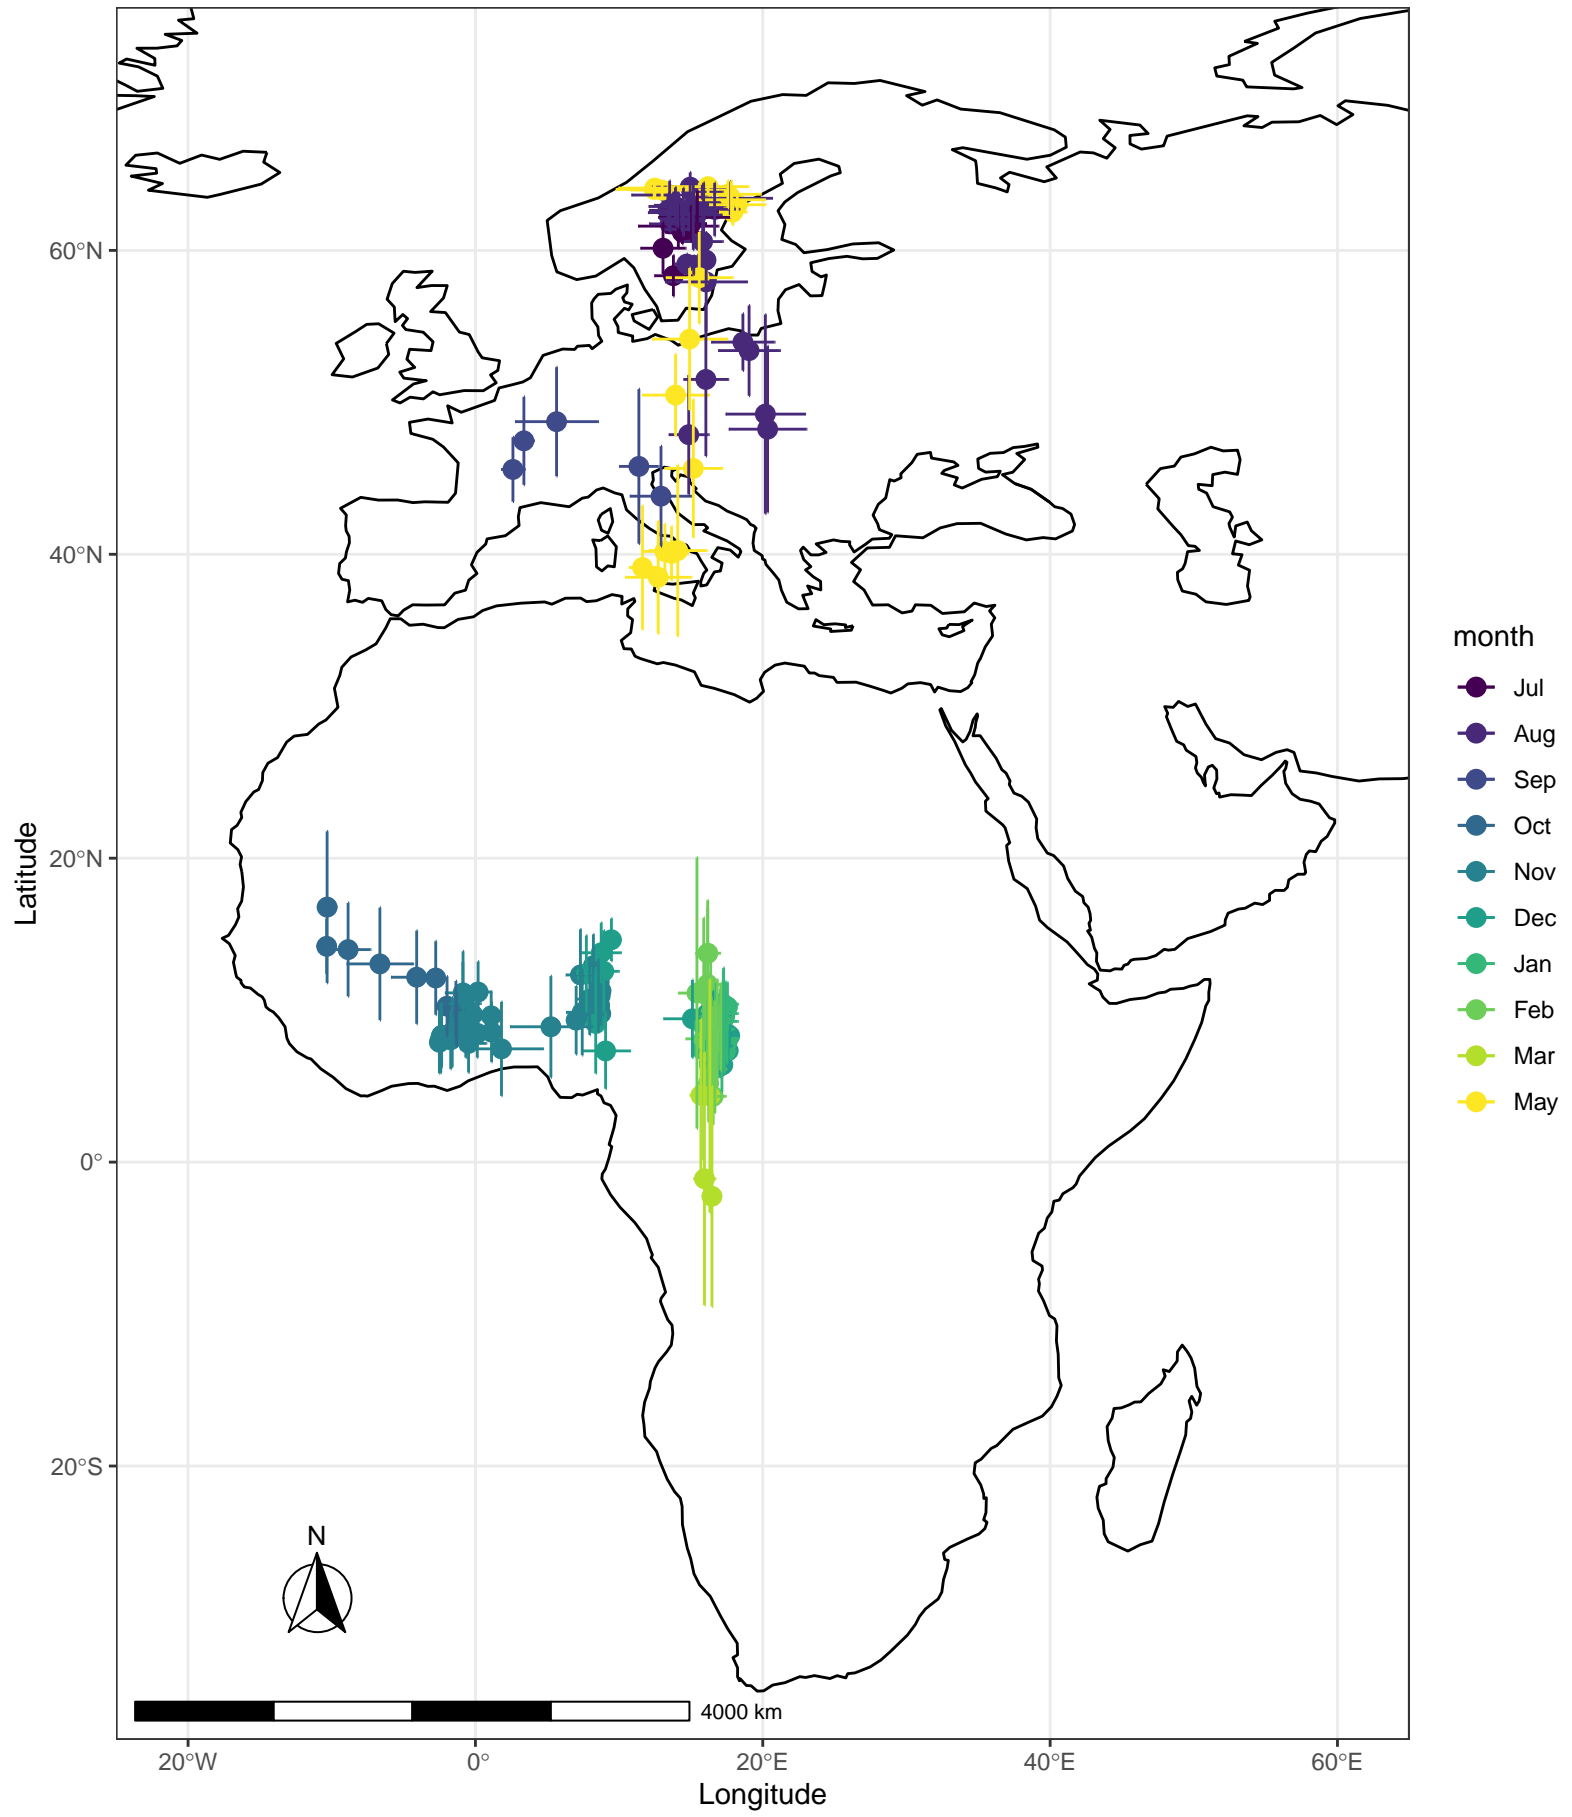

BN907

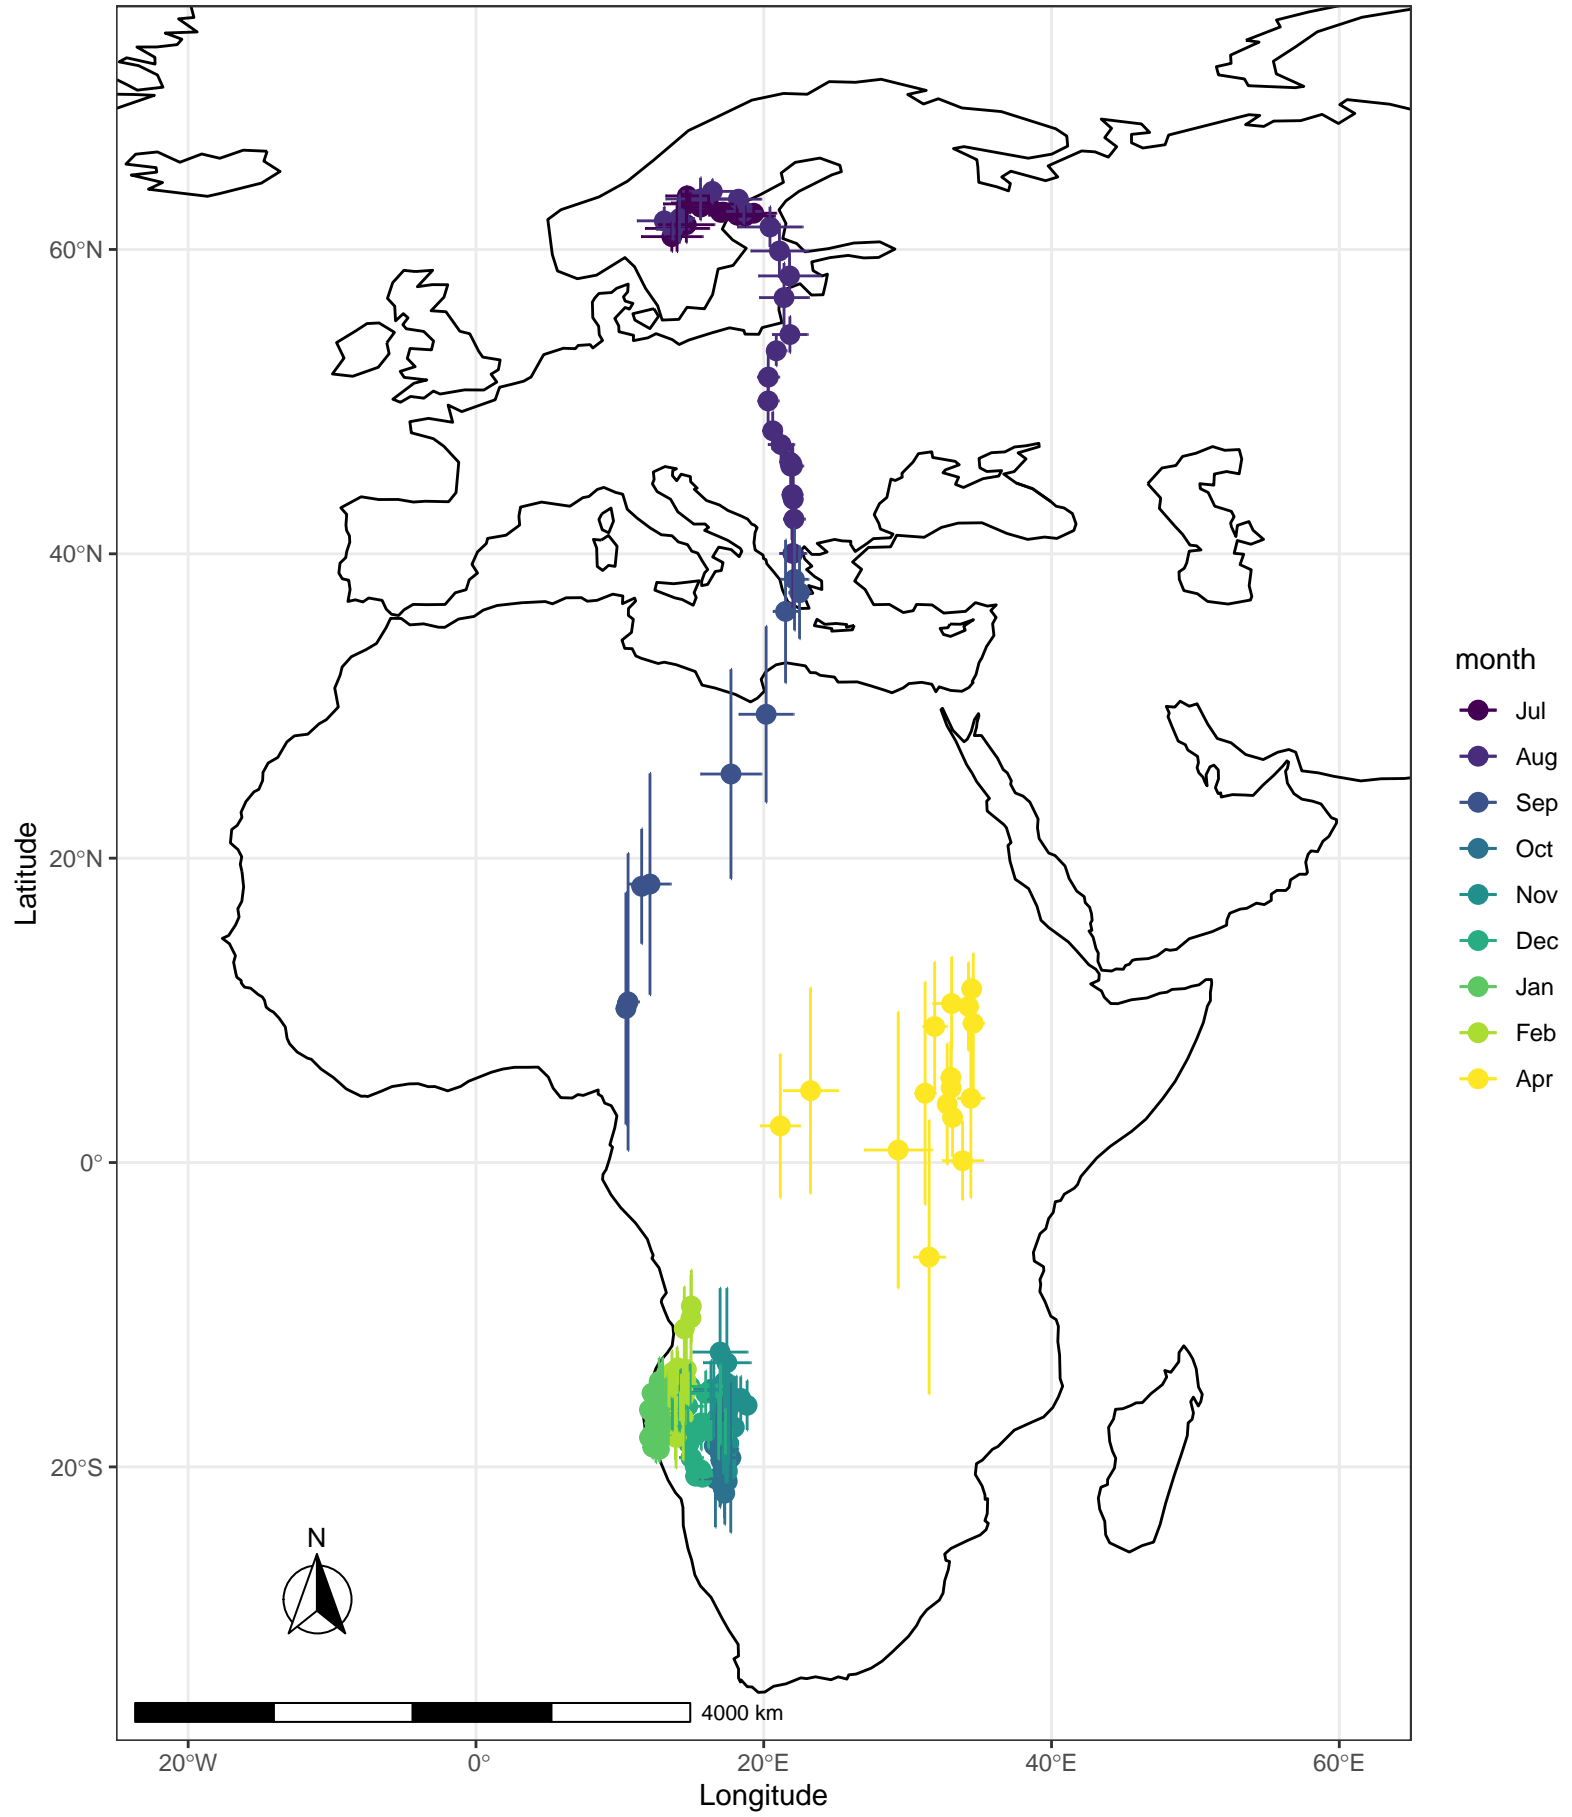

BN886

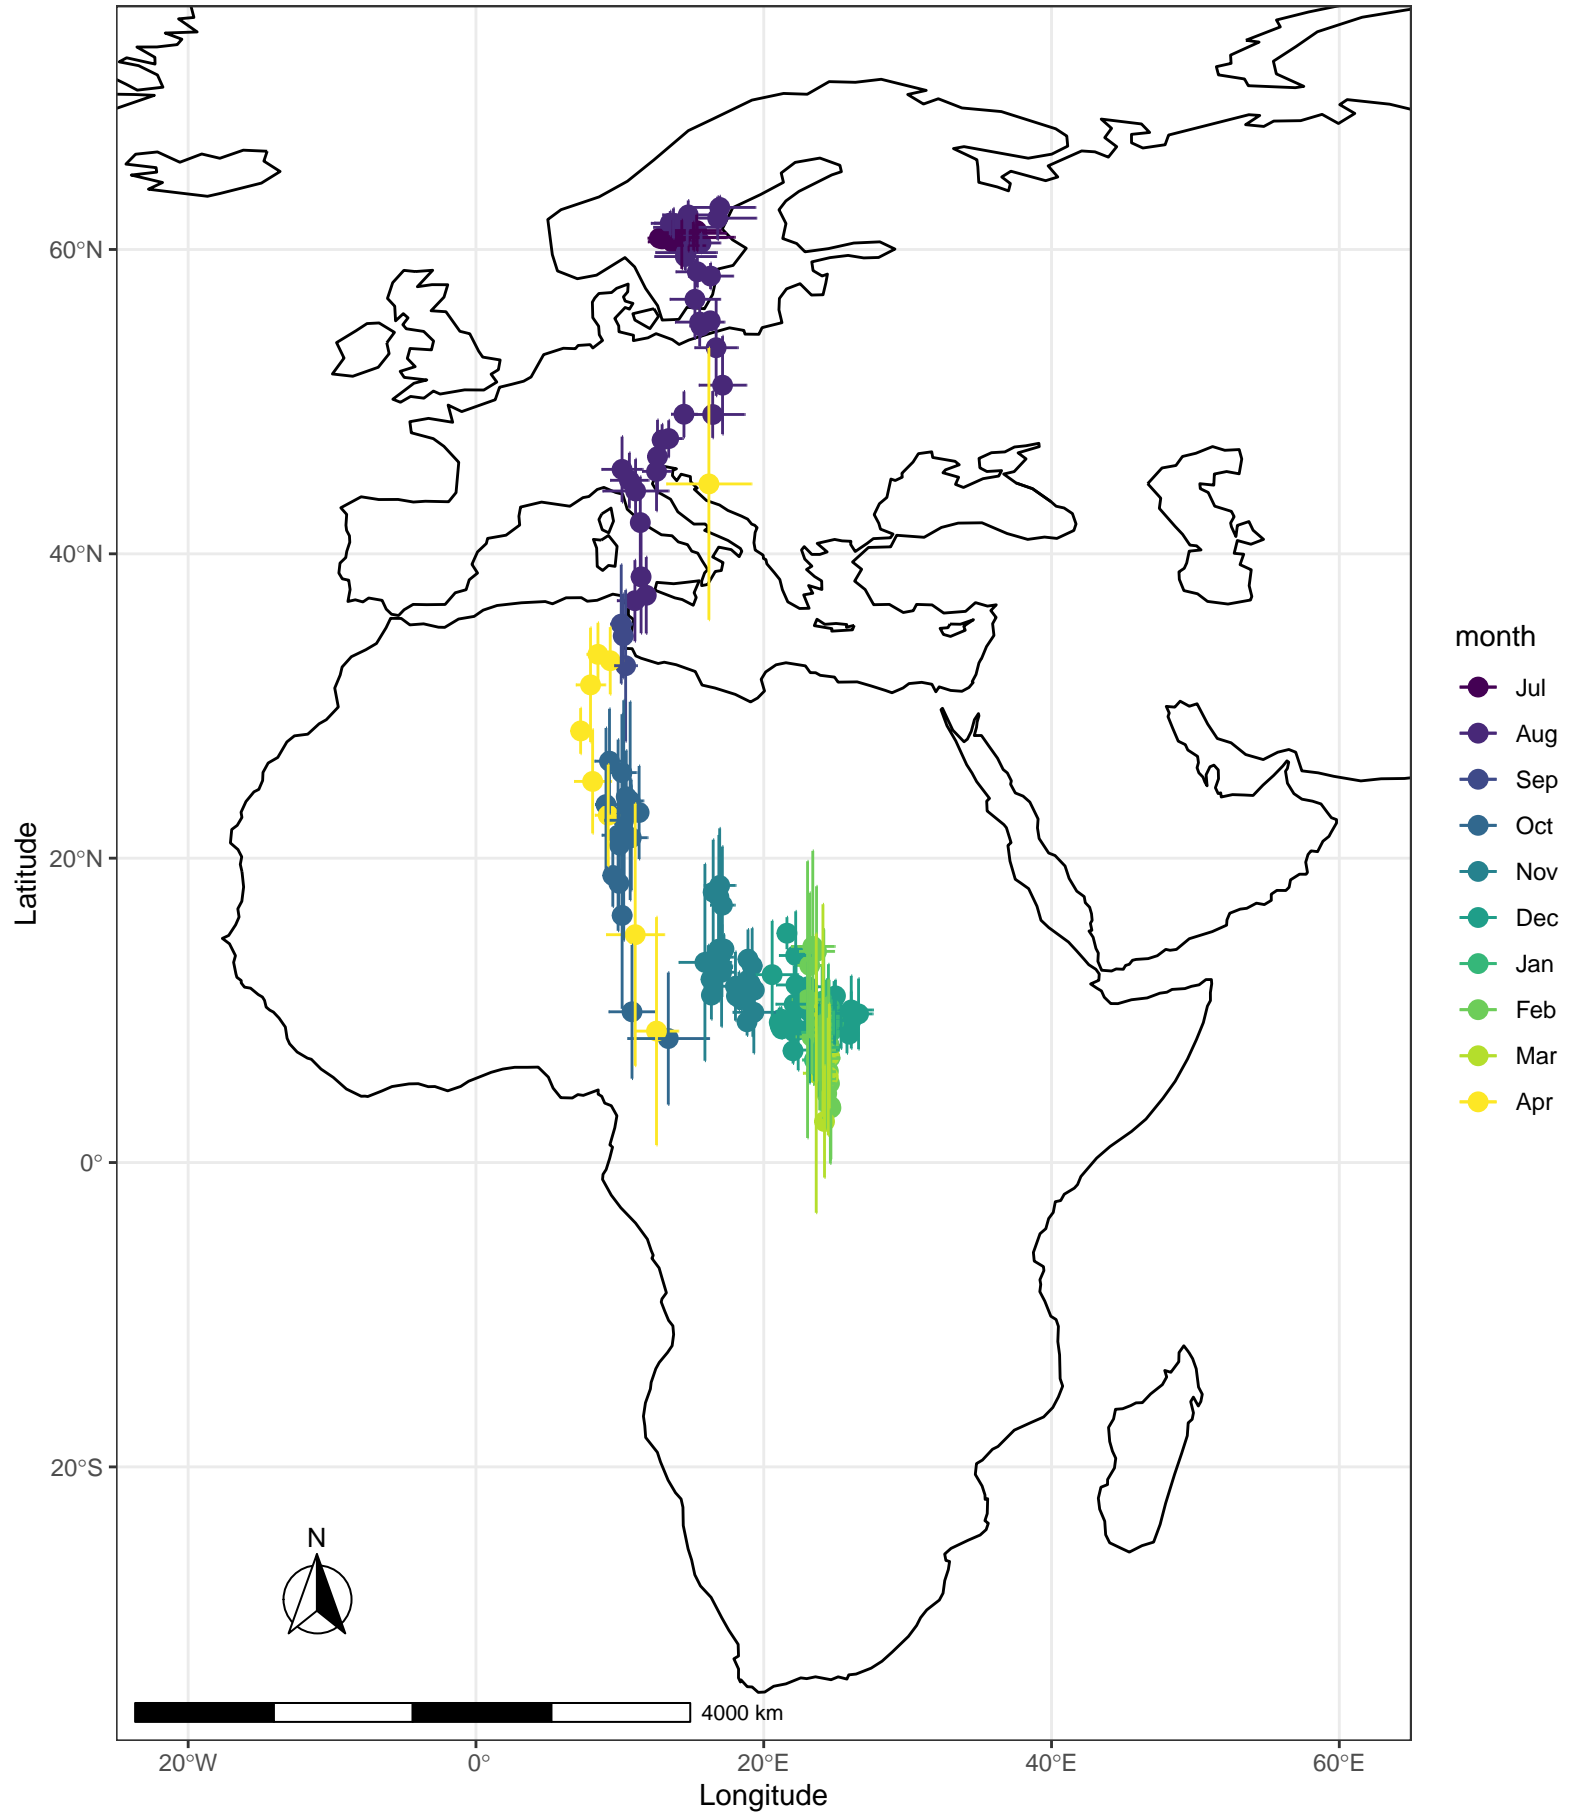



BN933

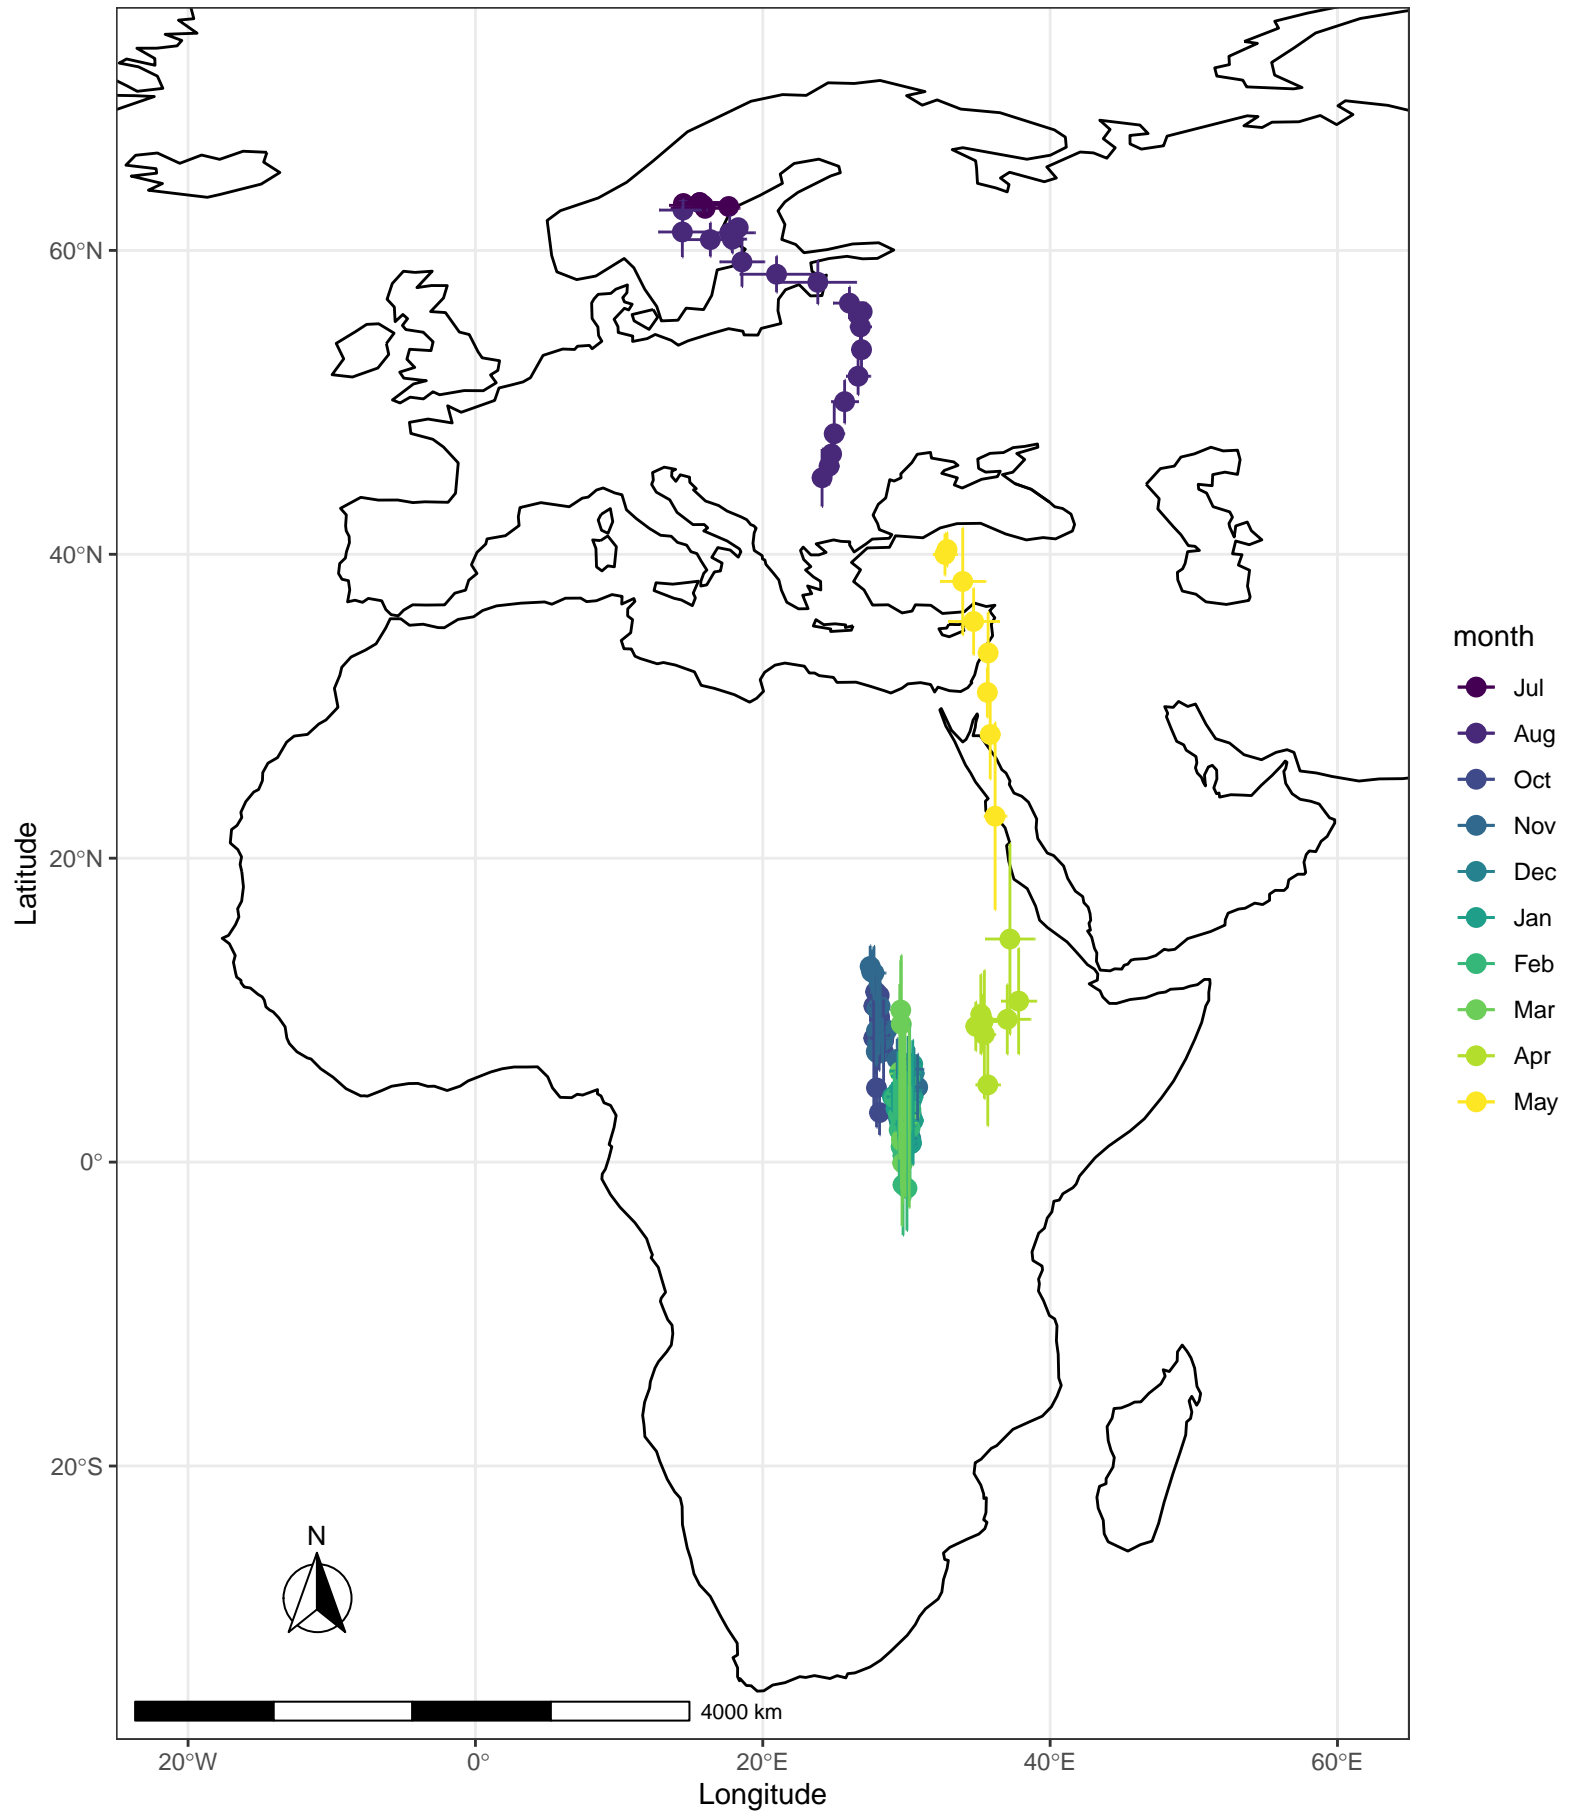

BN902

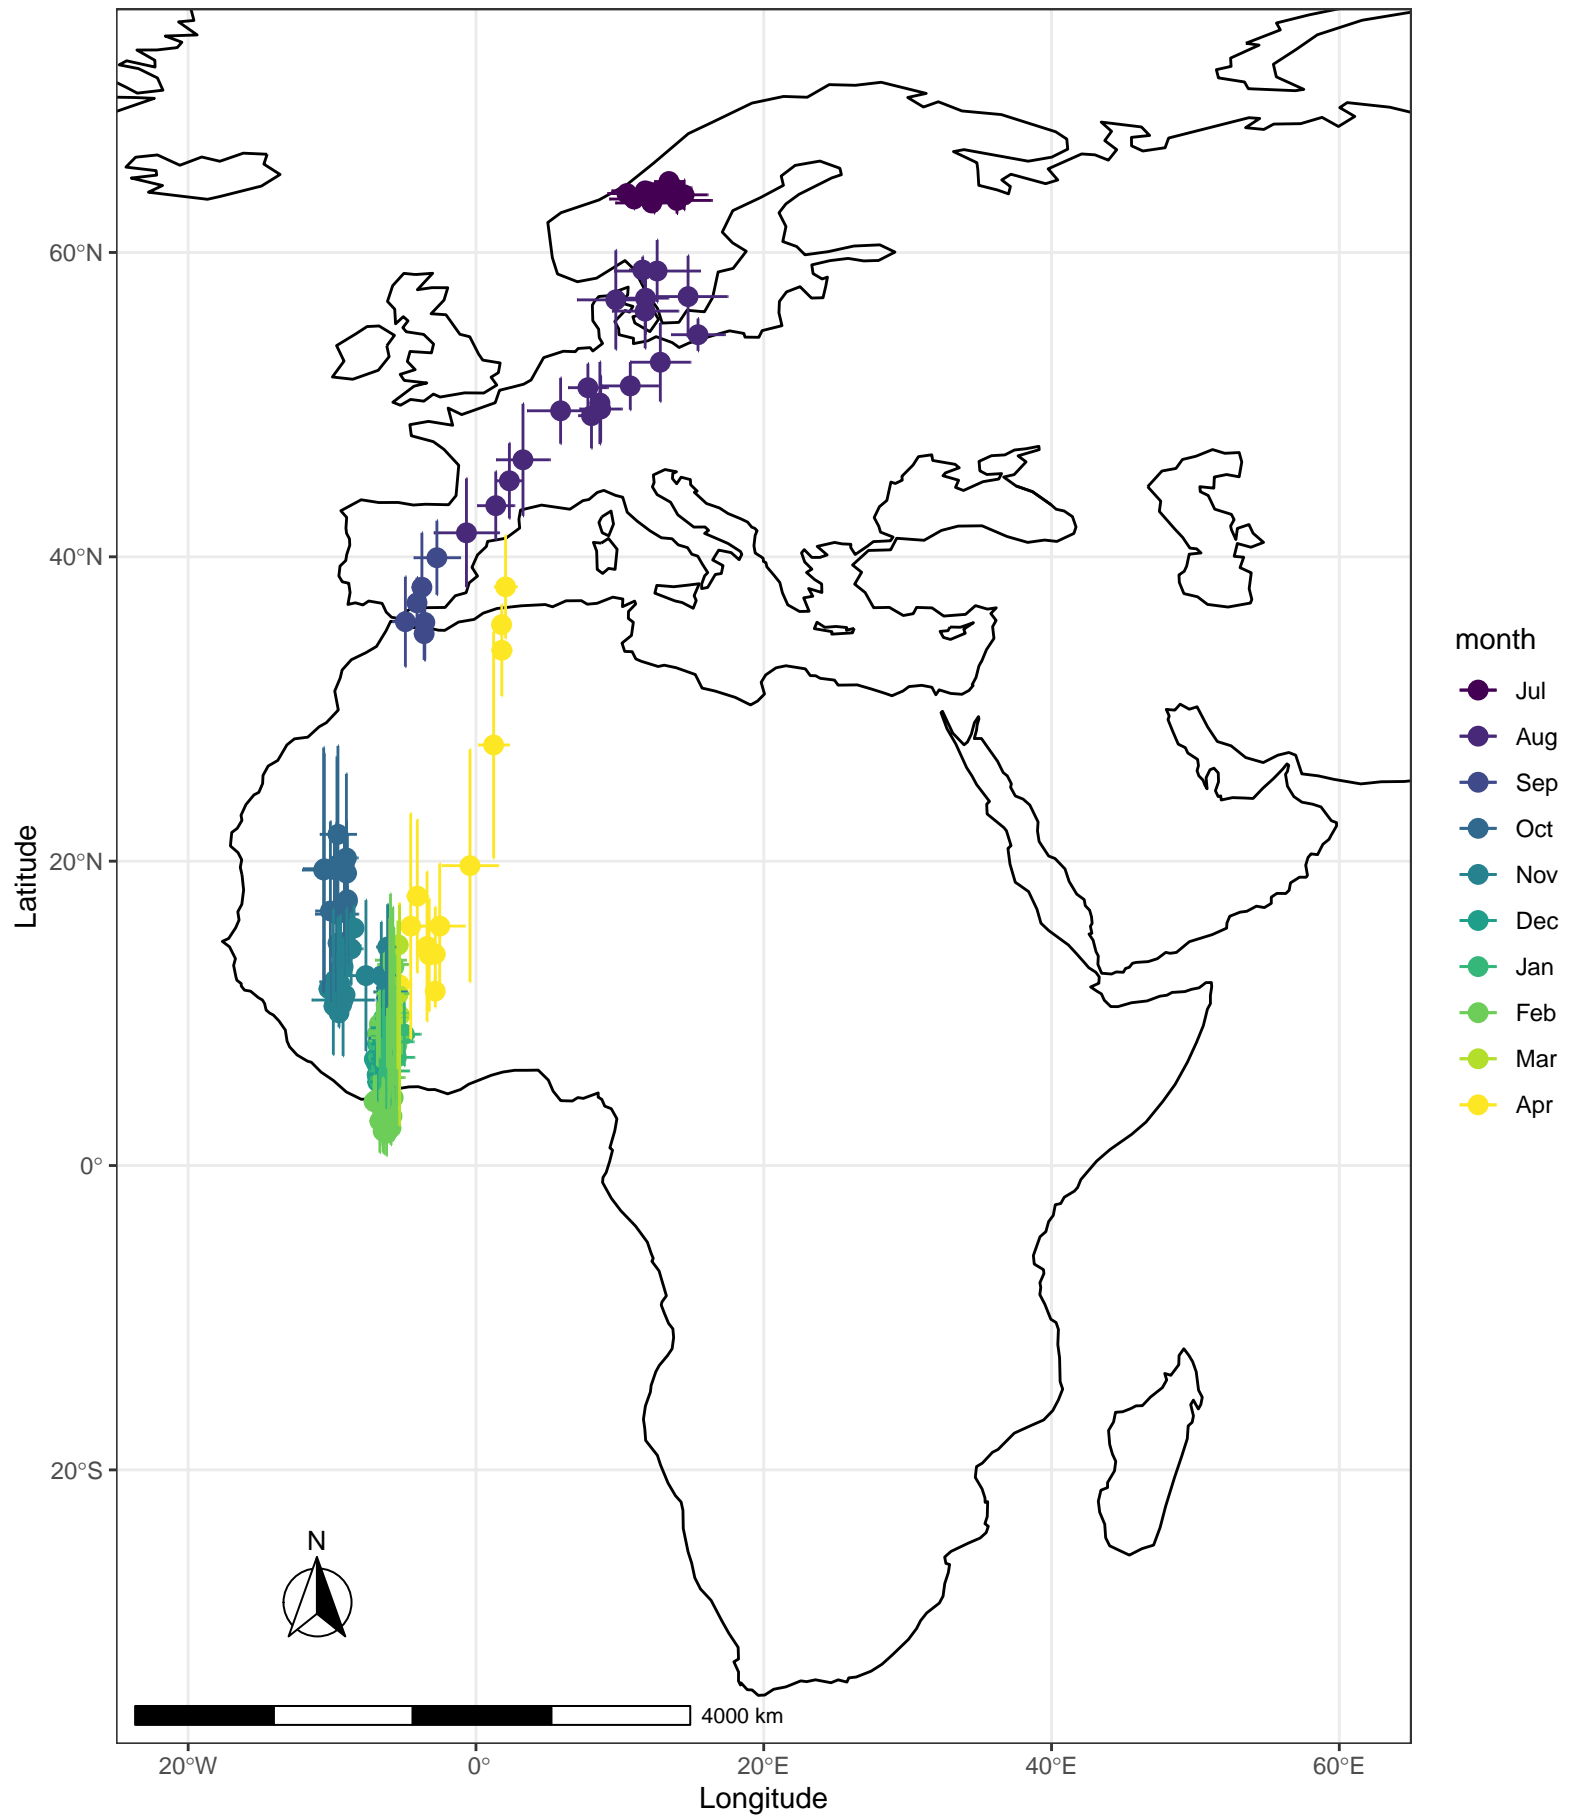

BN908

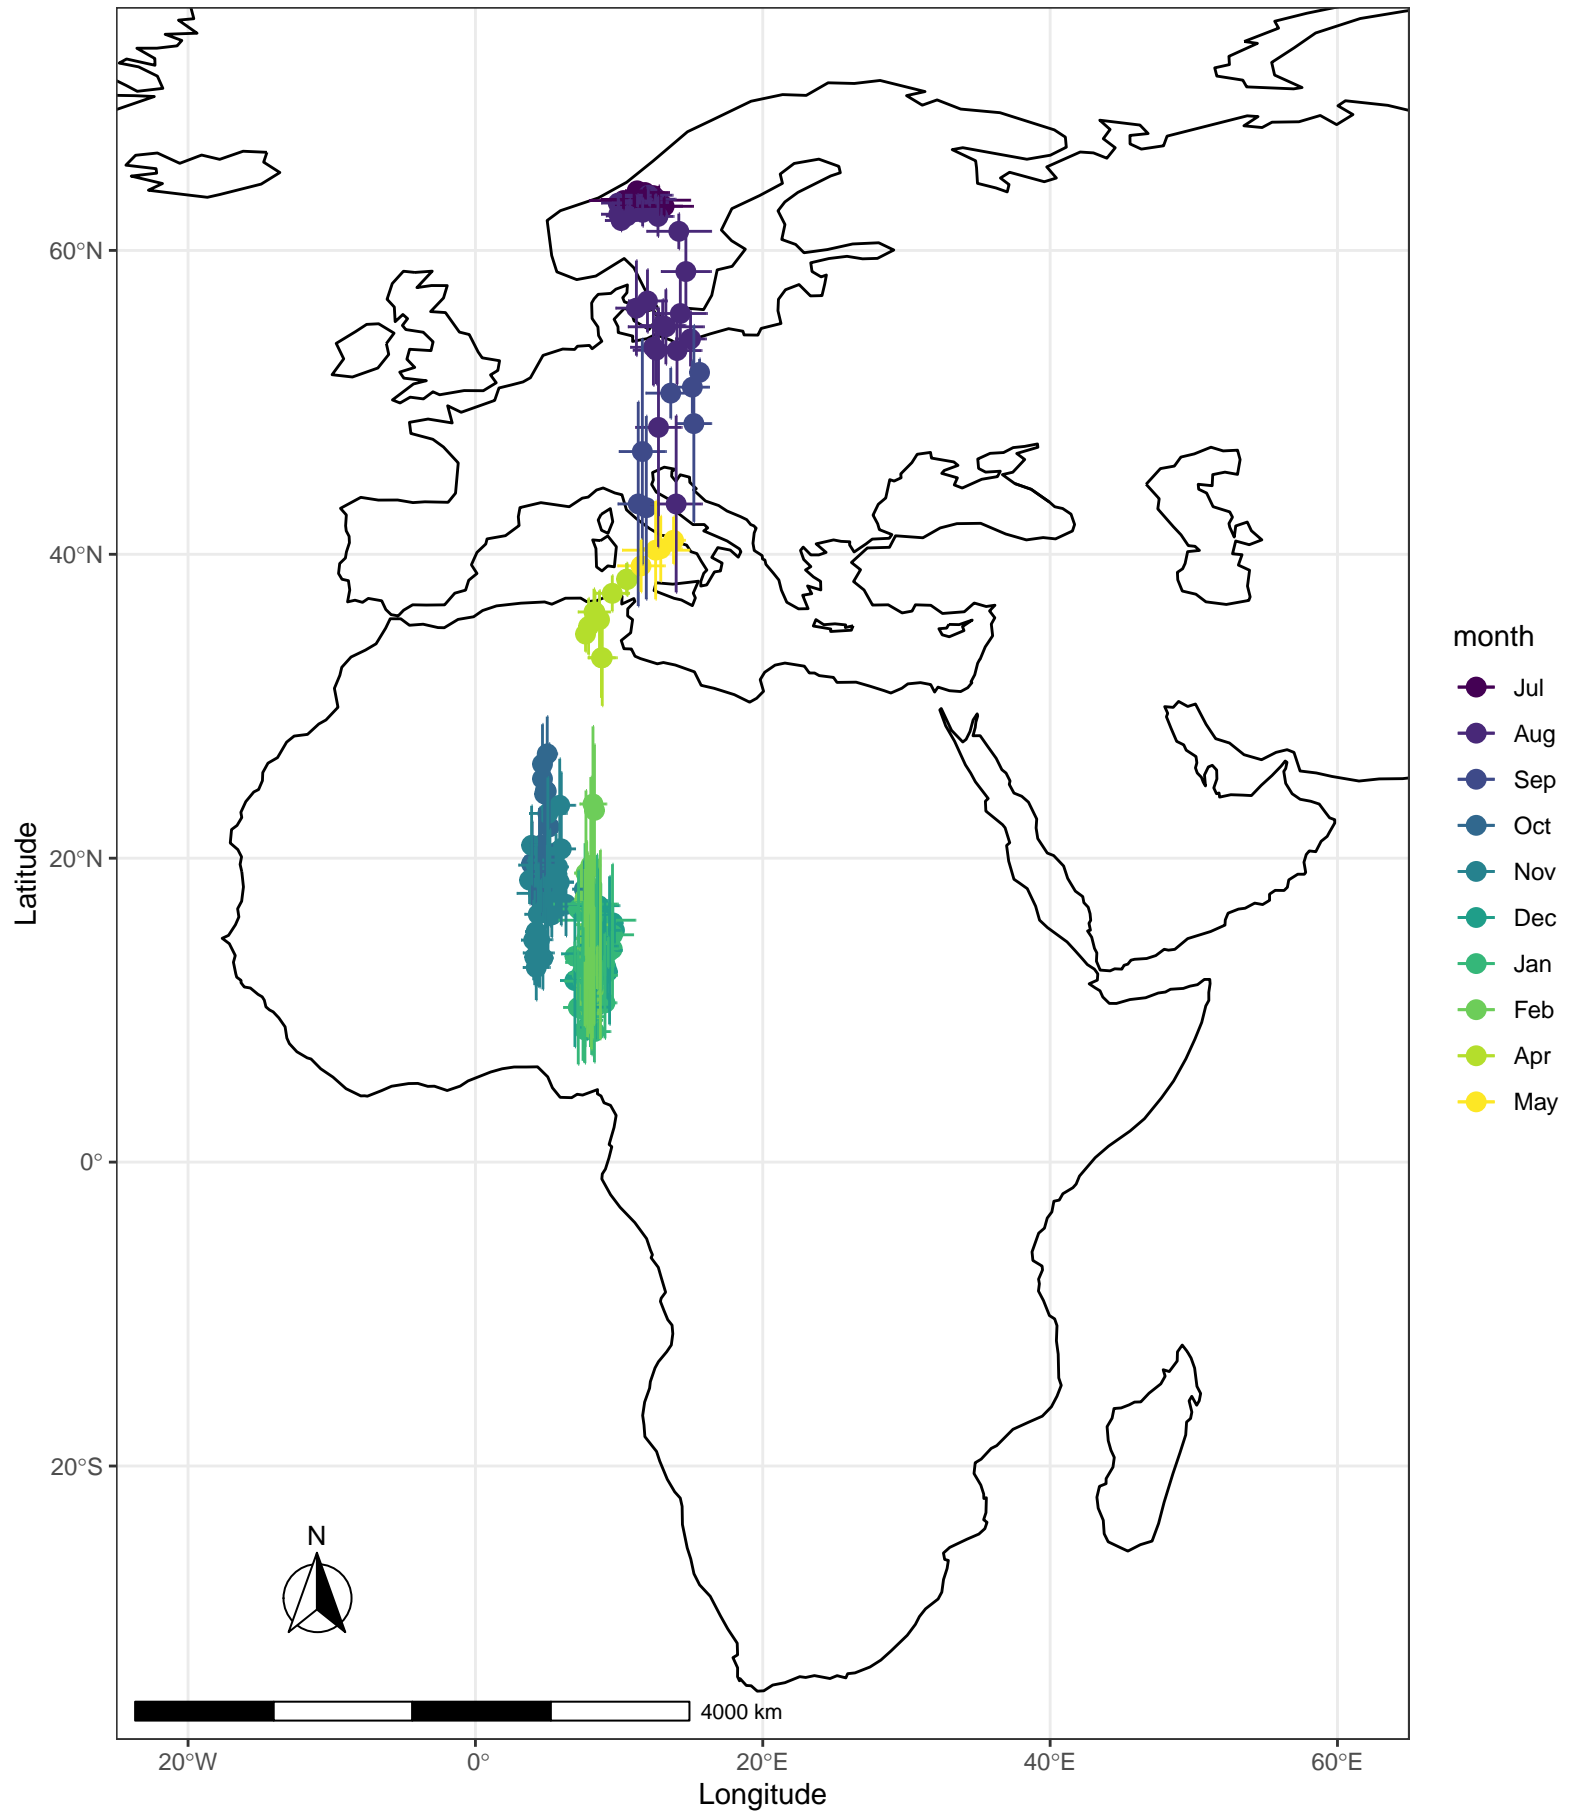

BN934

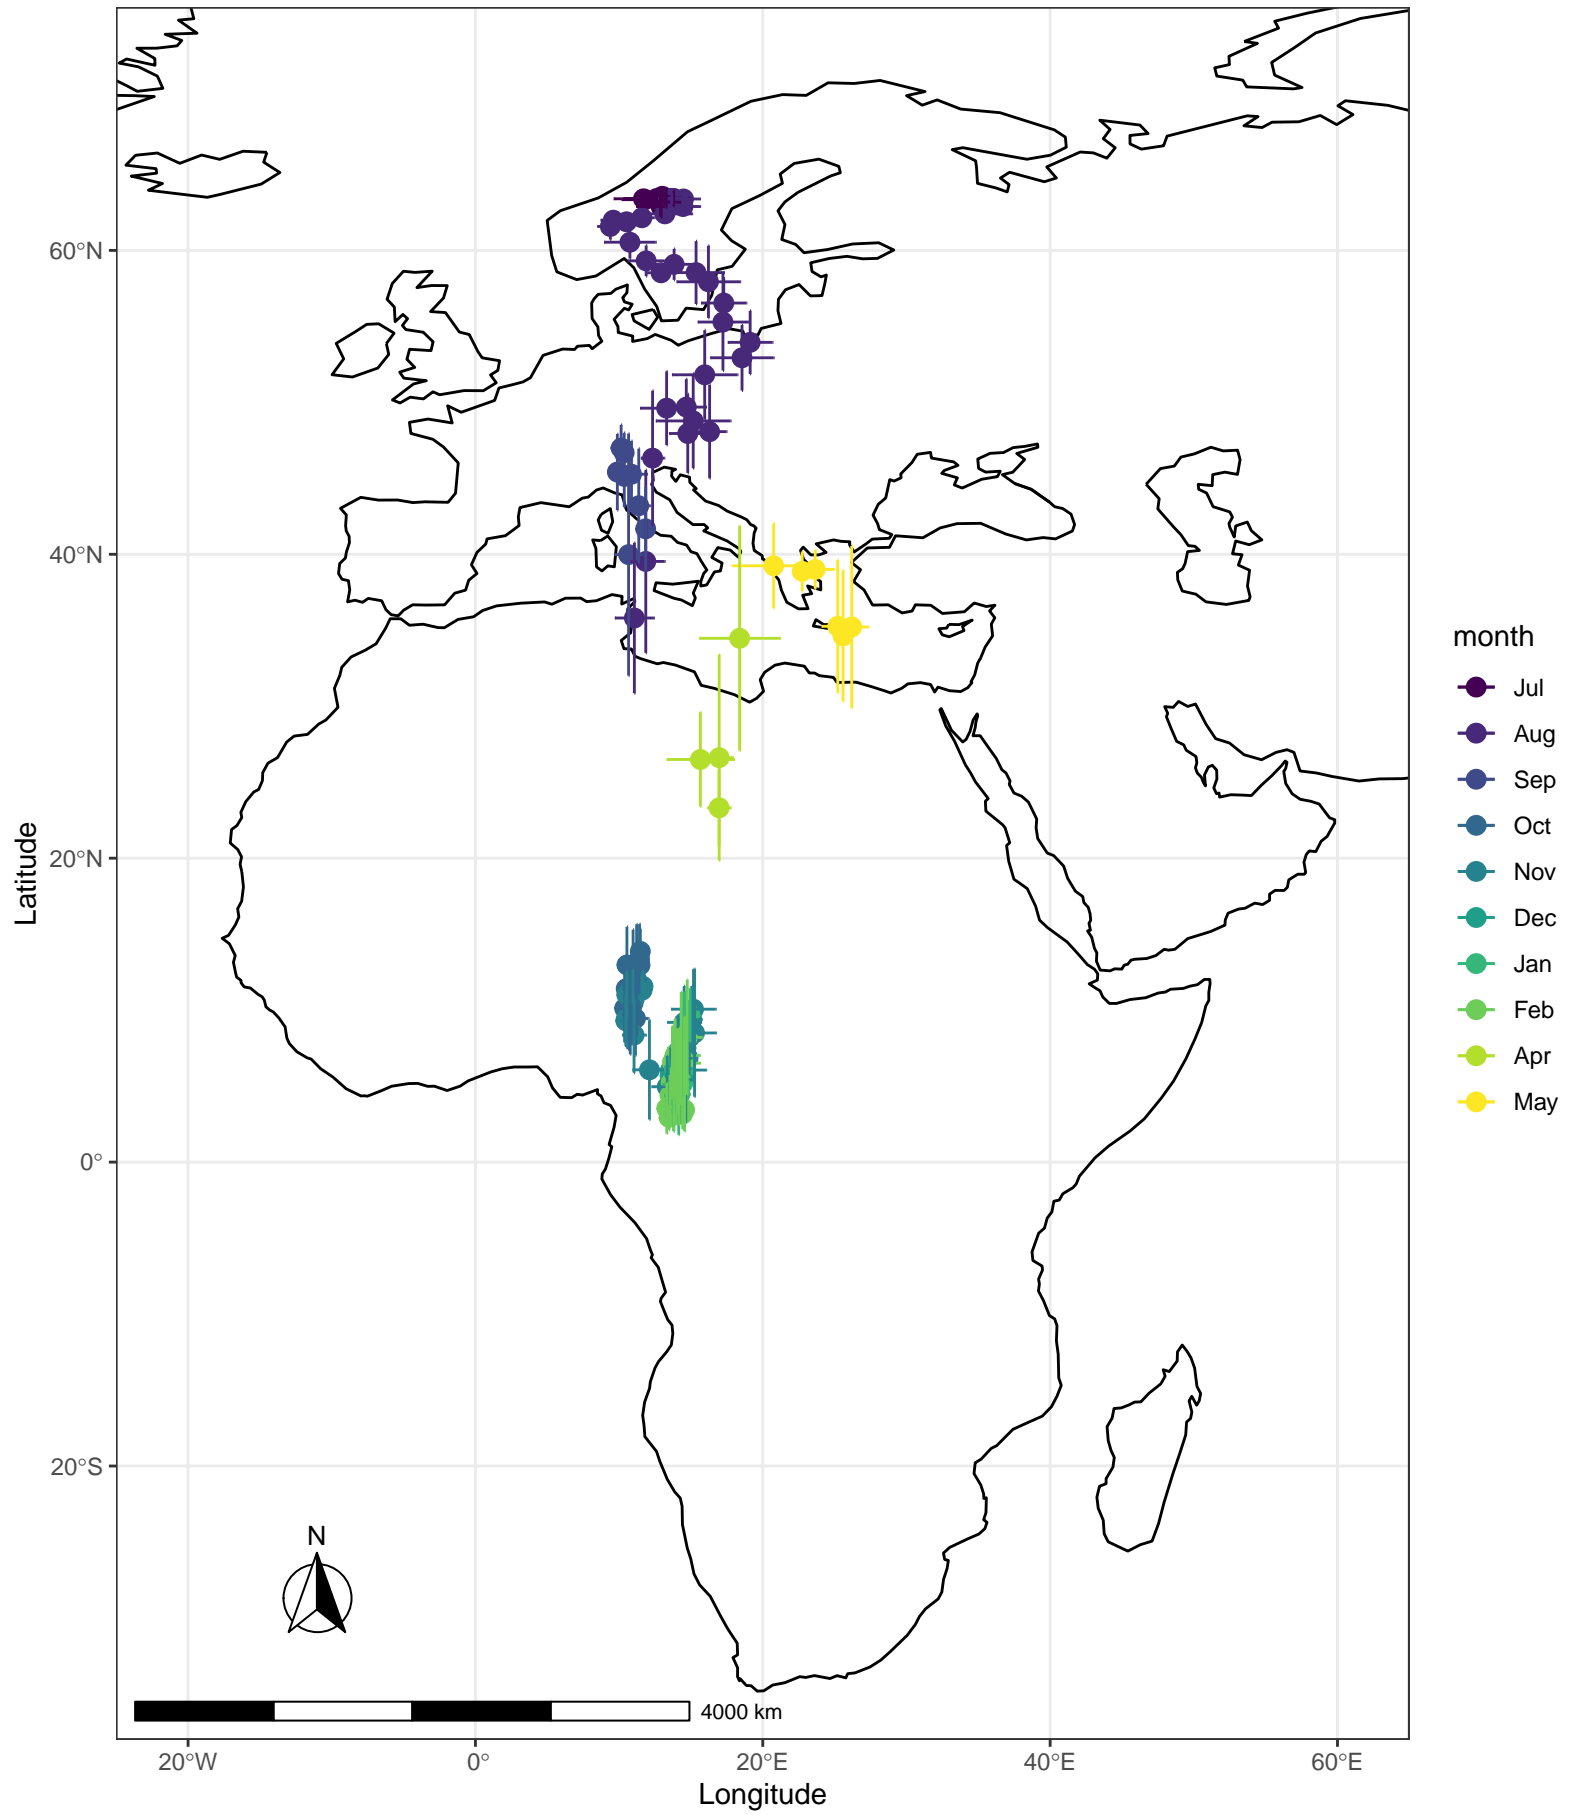

BN898

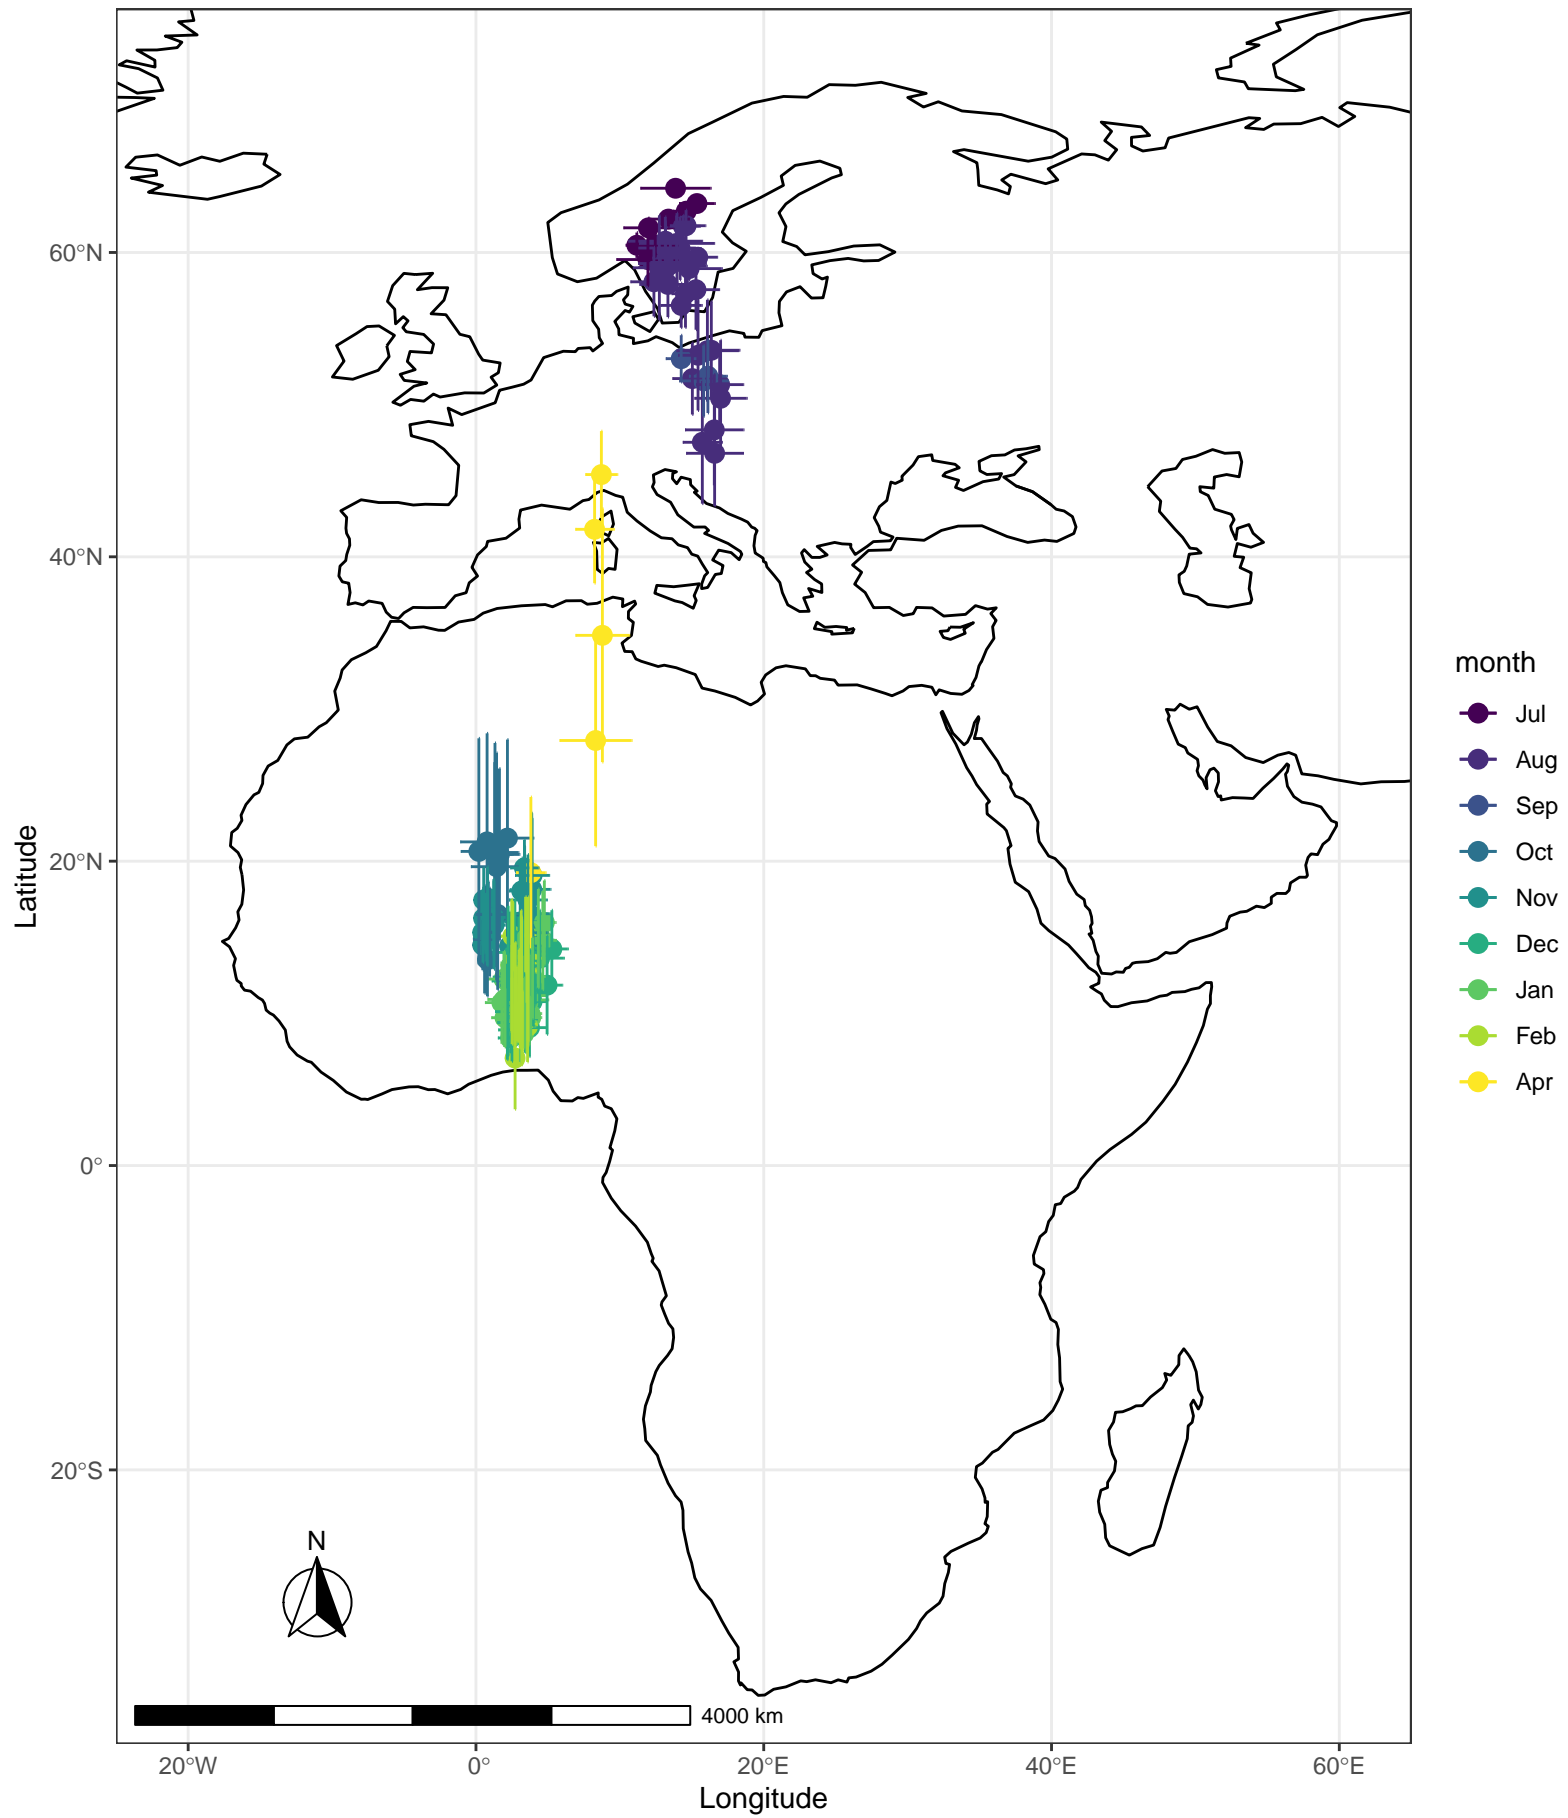

BM558

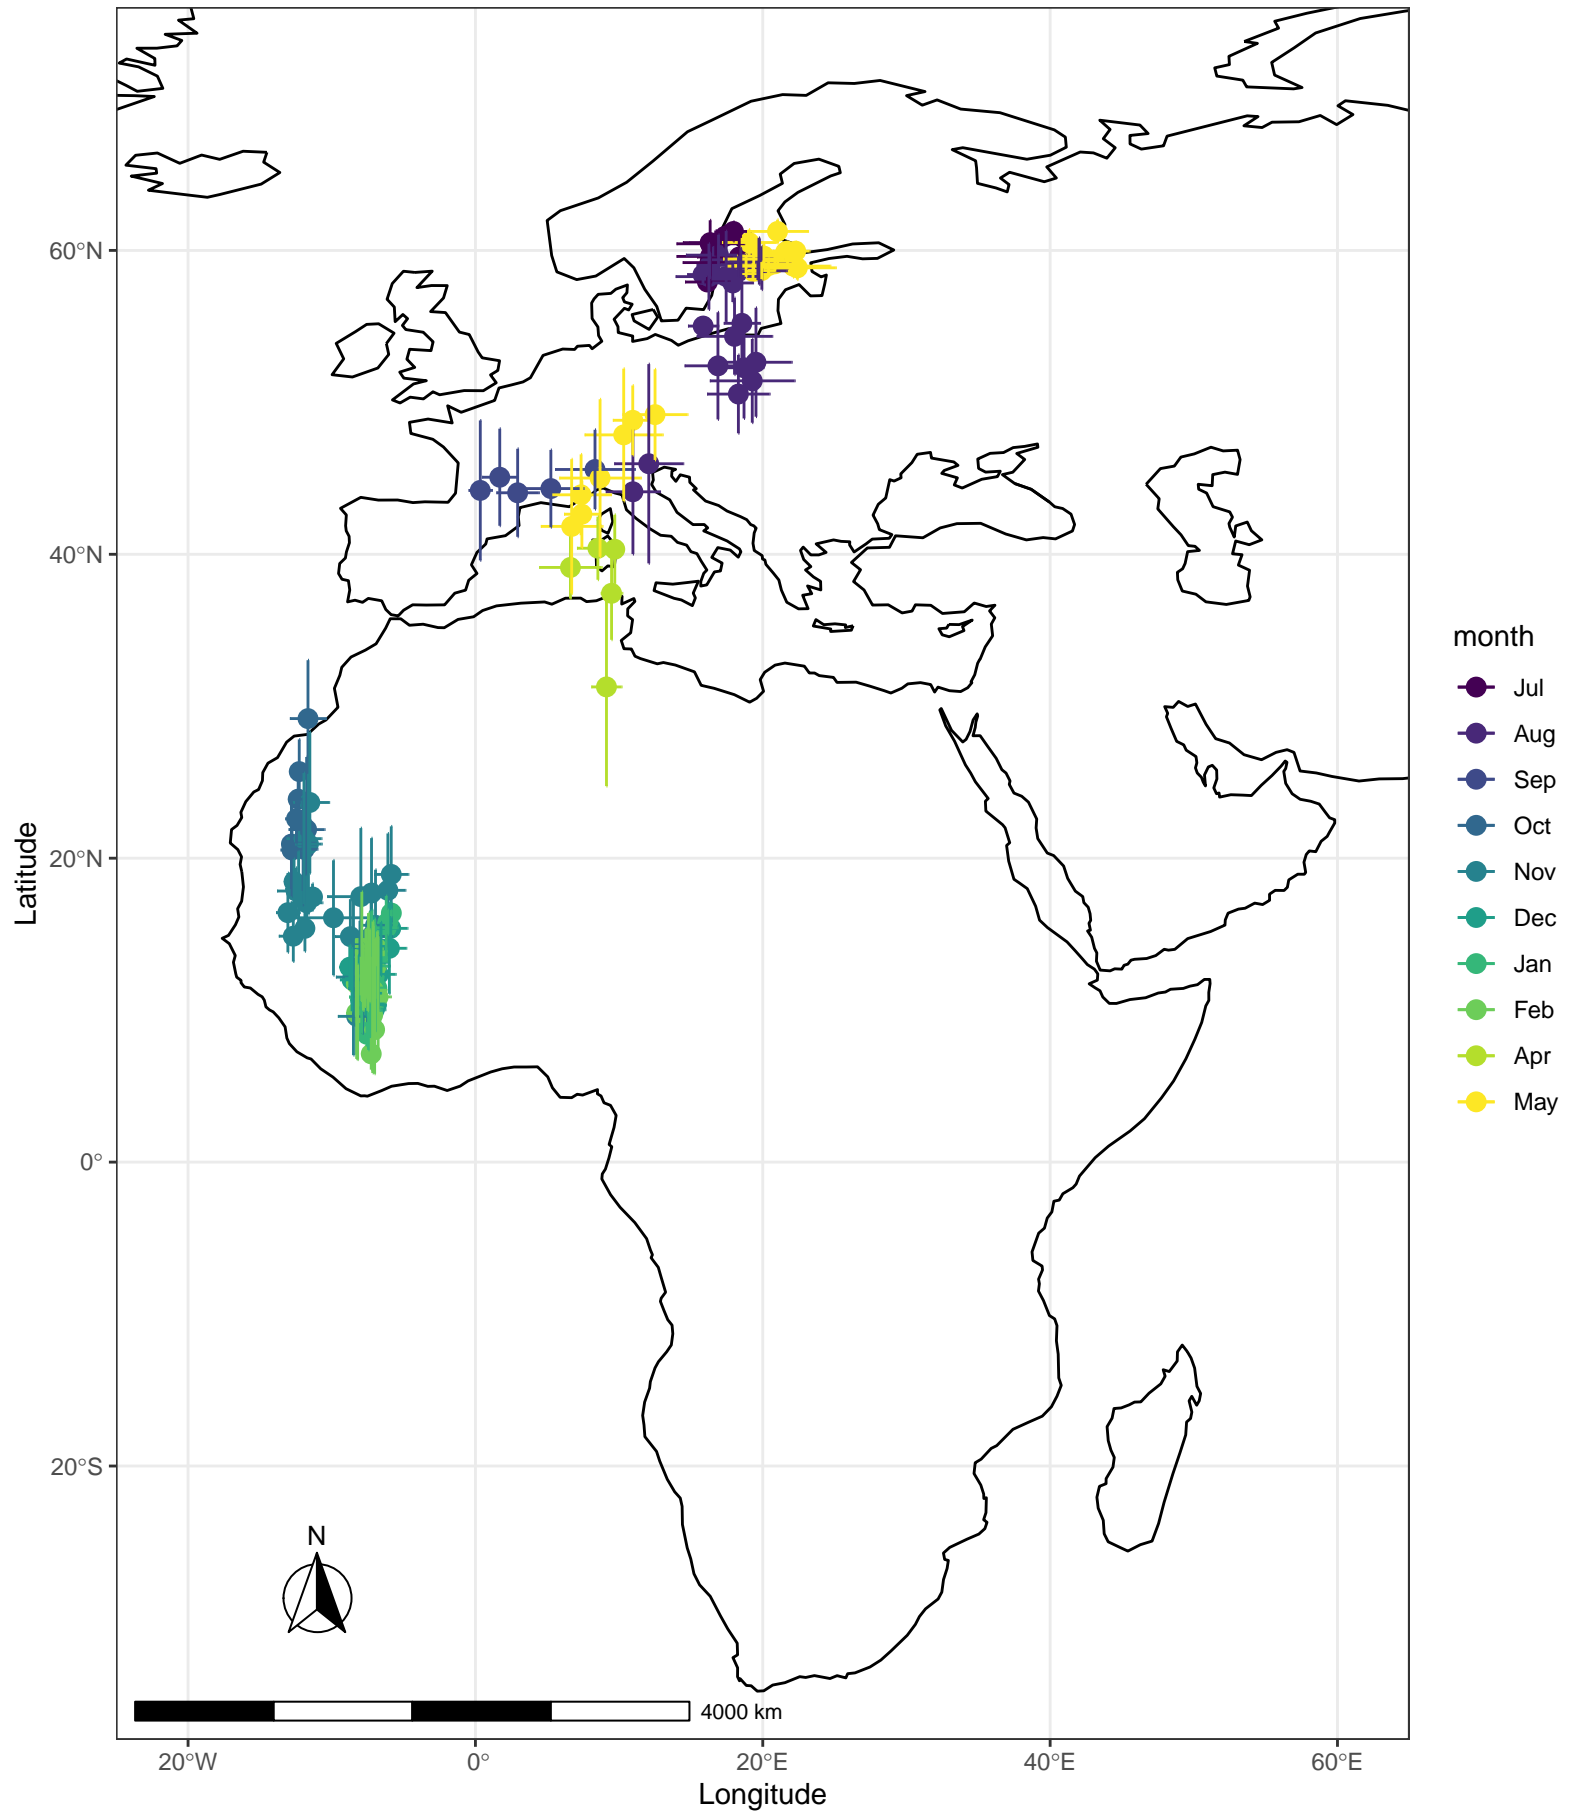

BN153

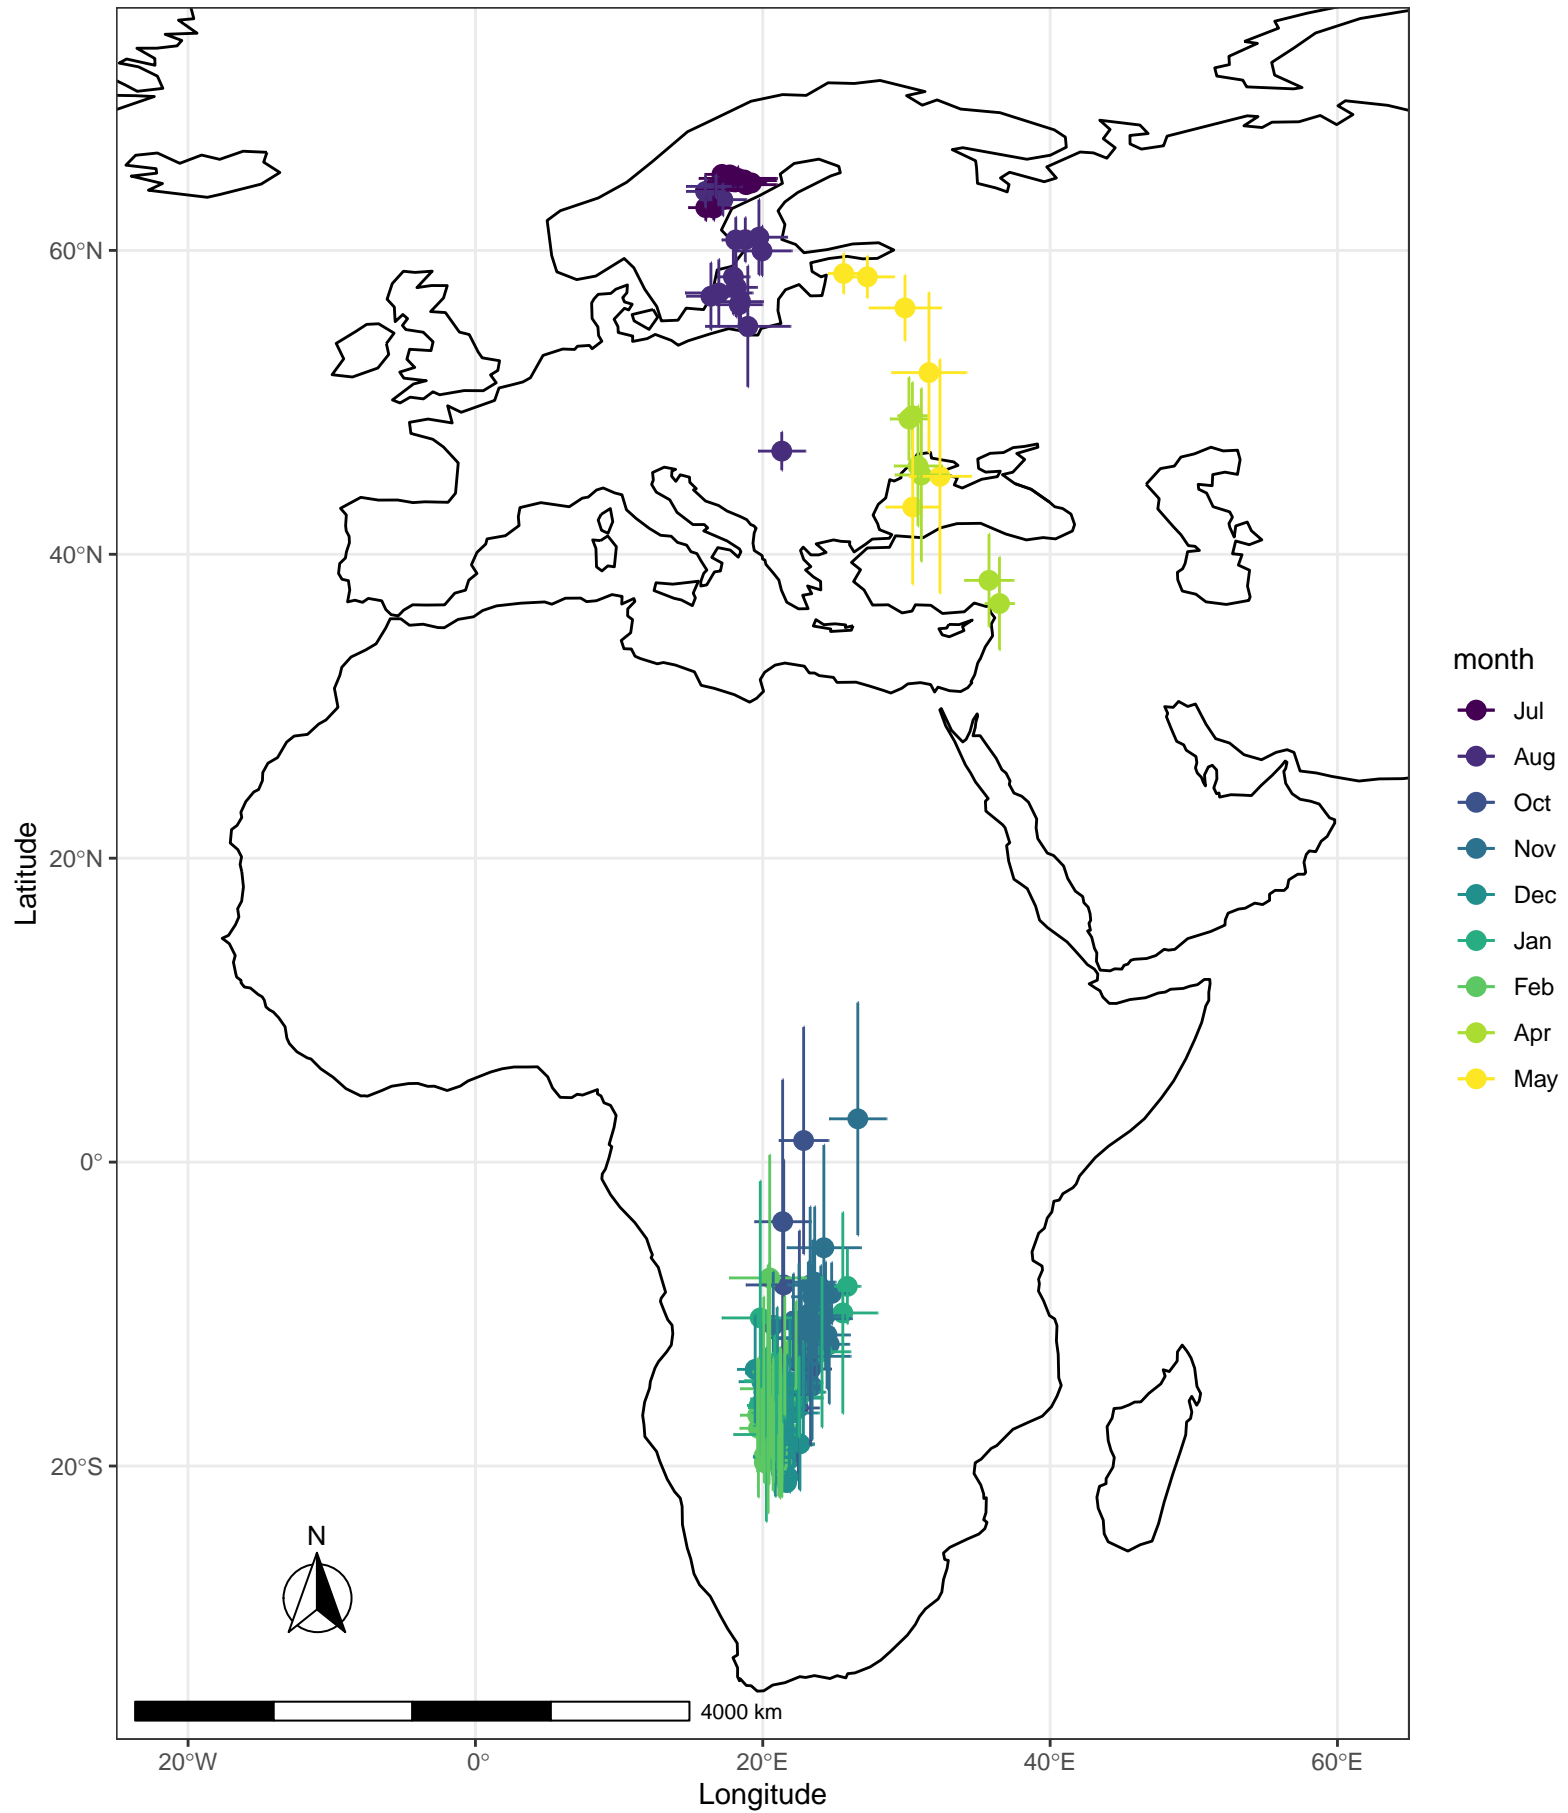

BM663

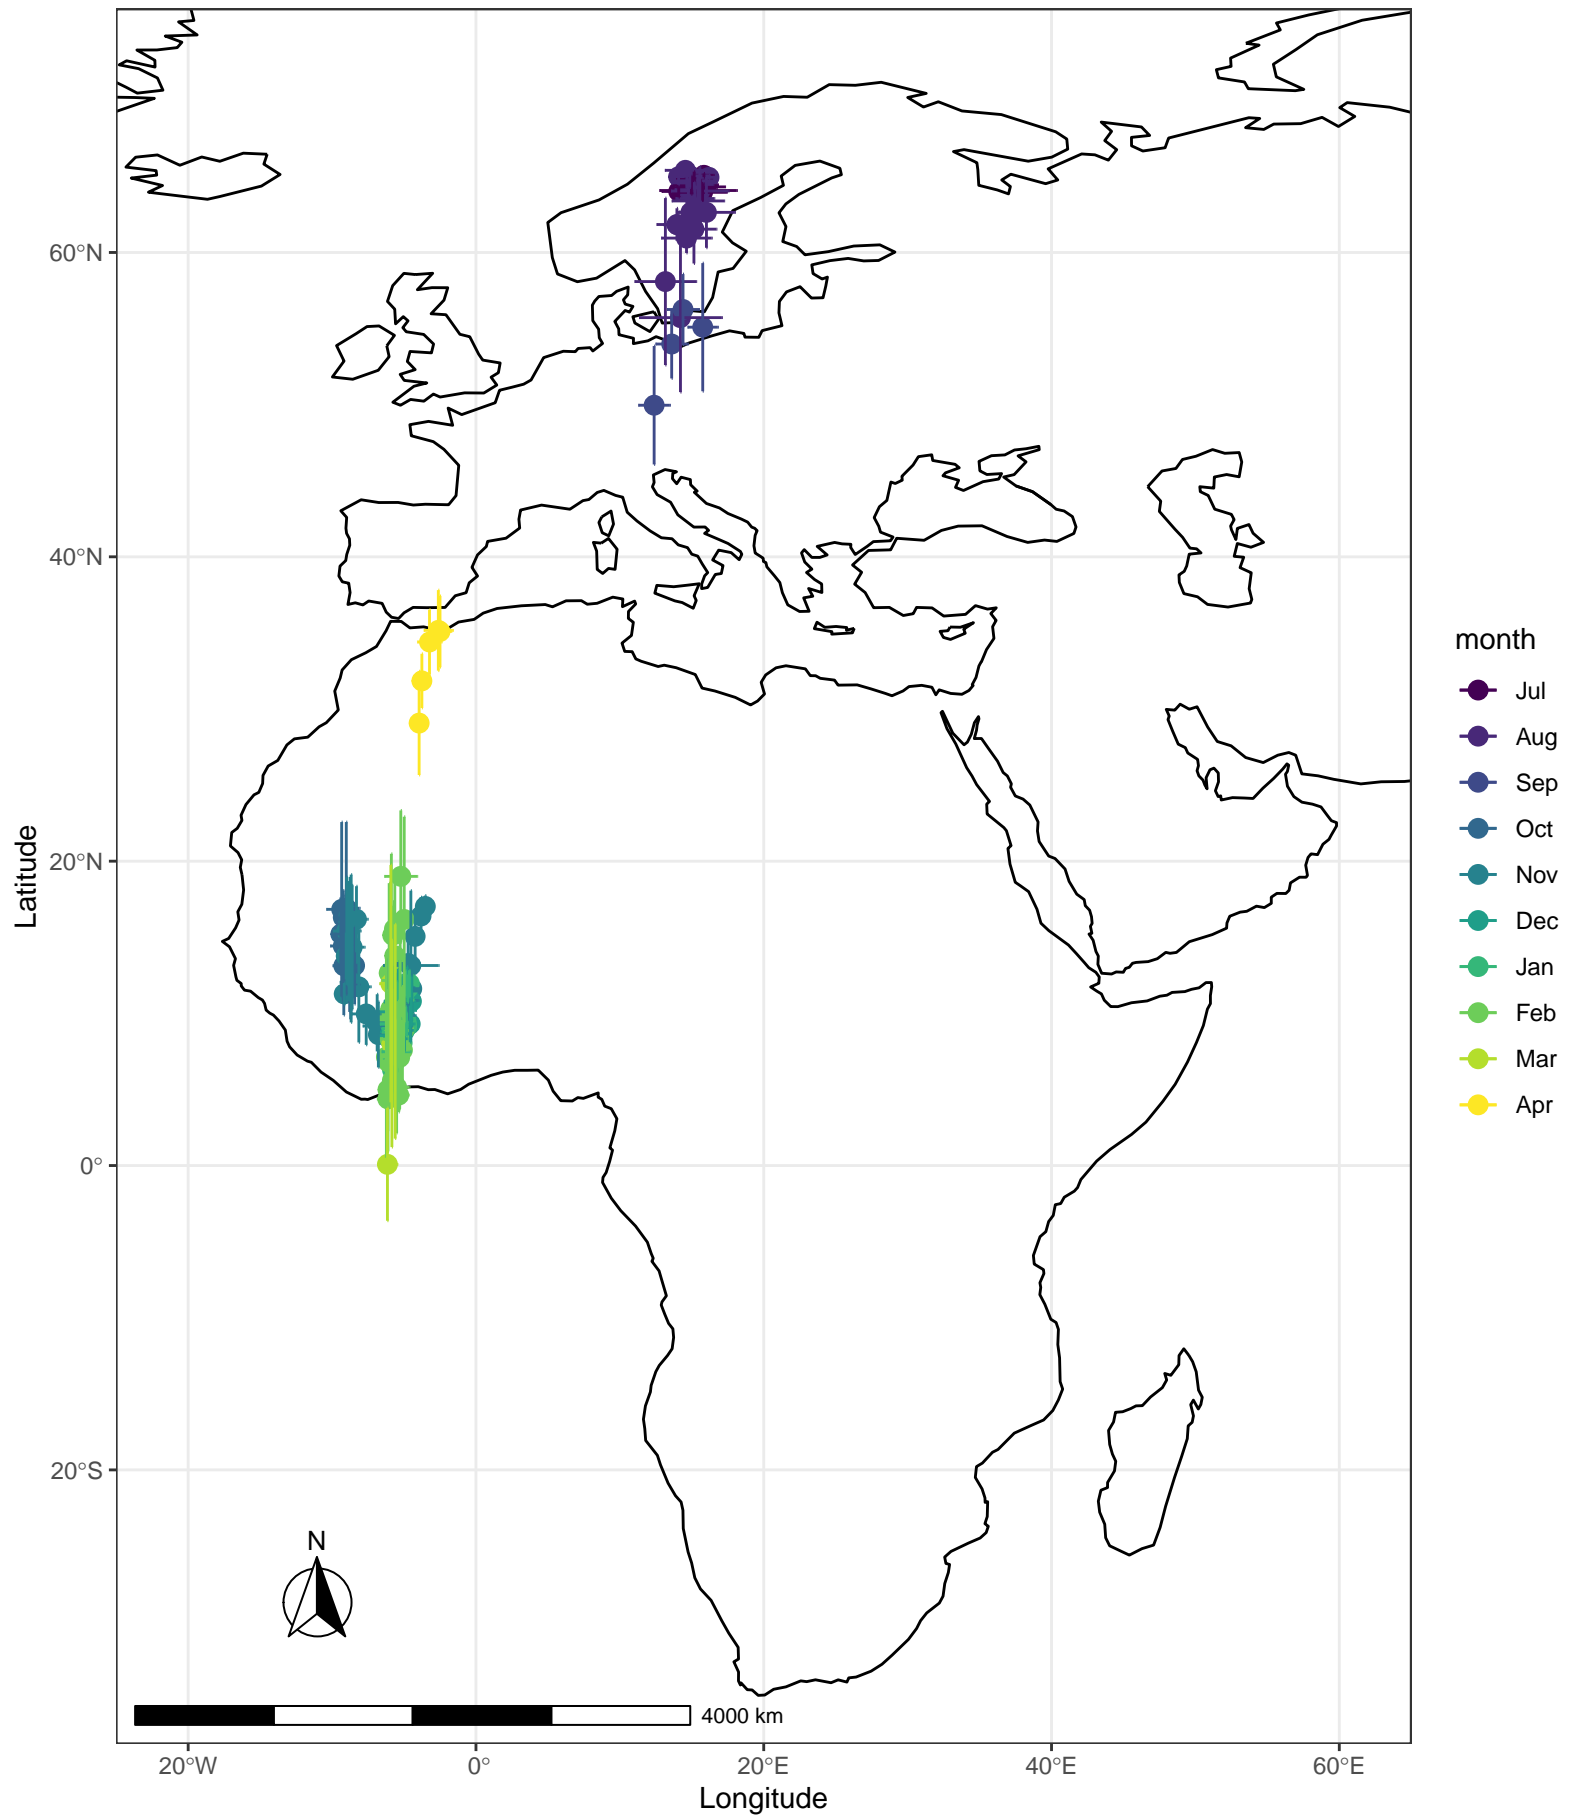



BM604

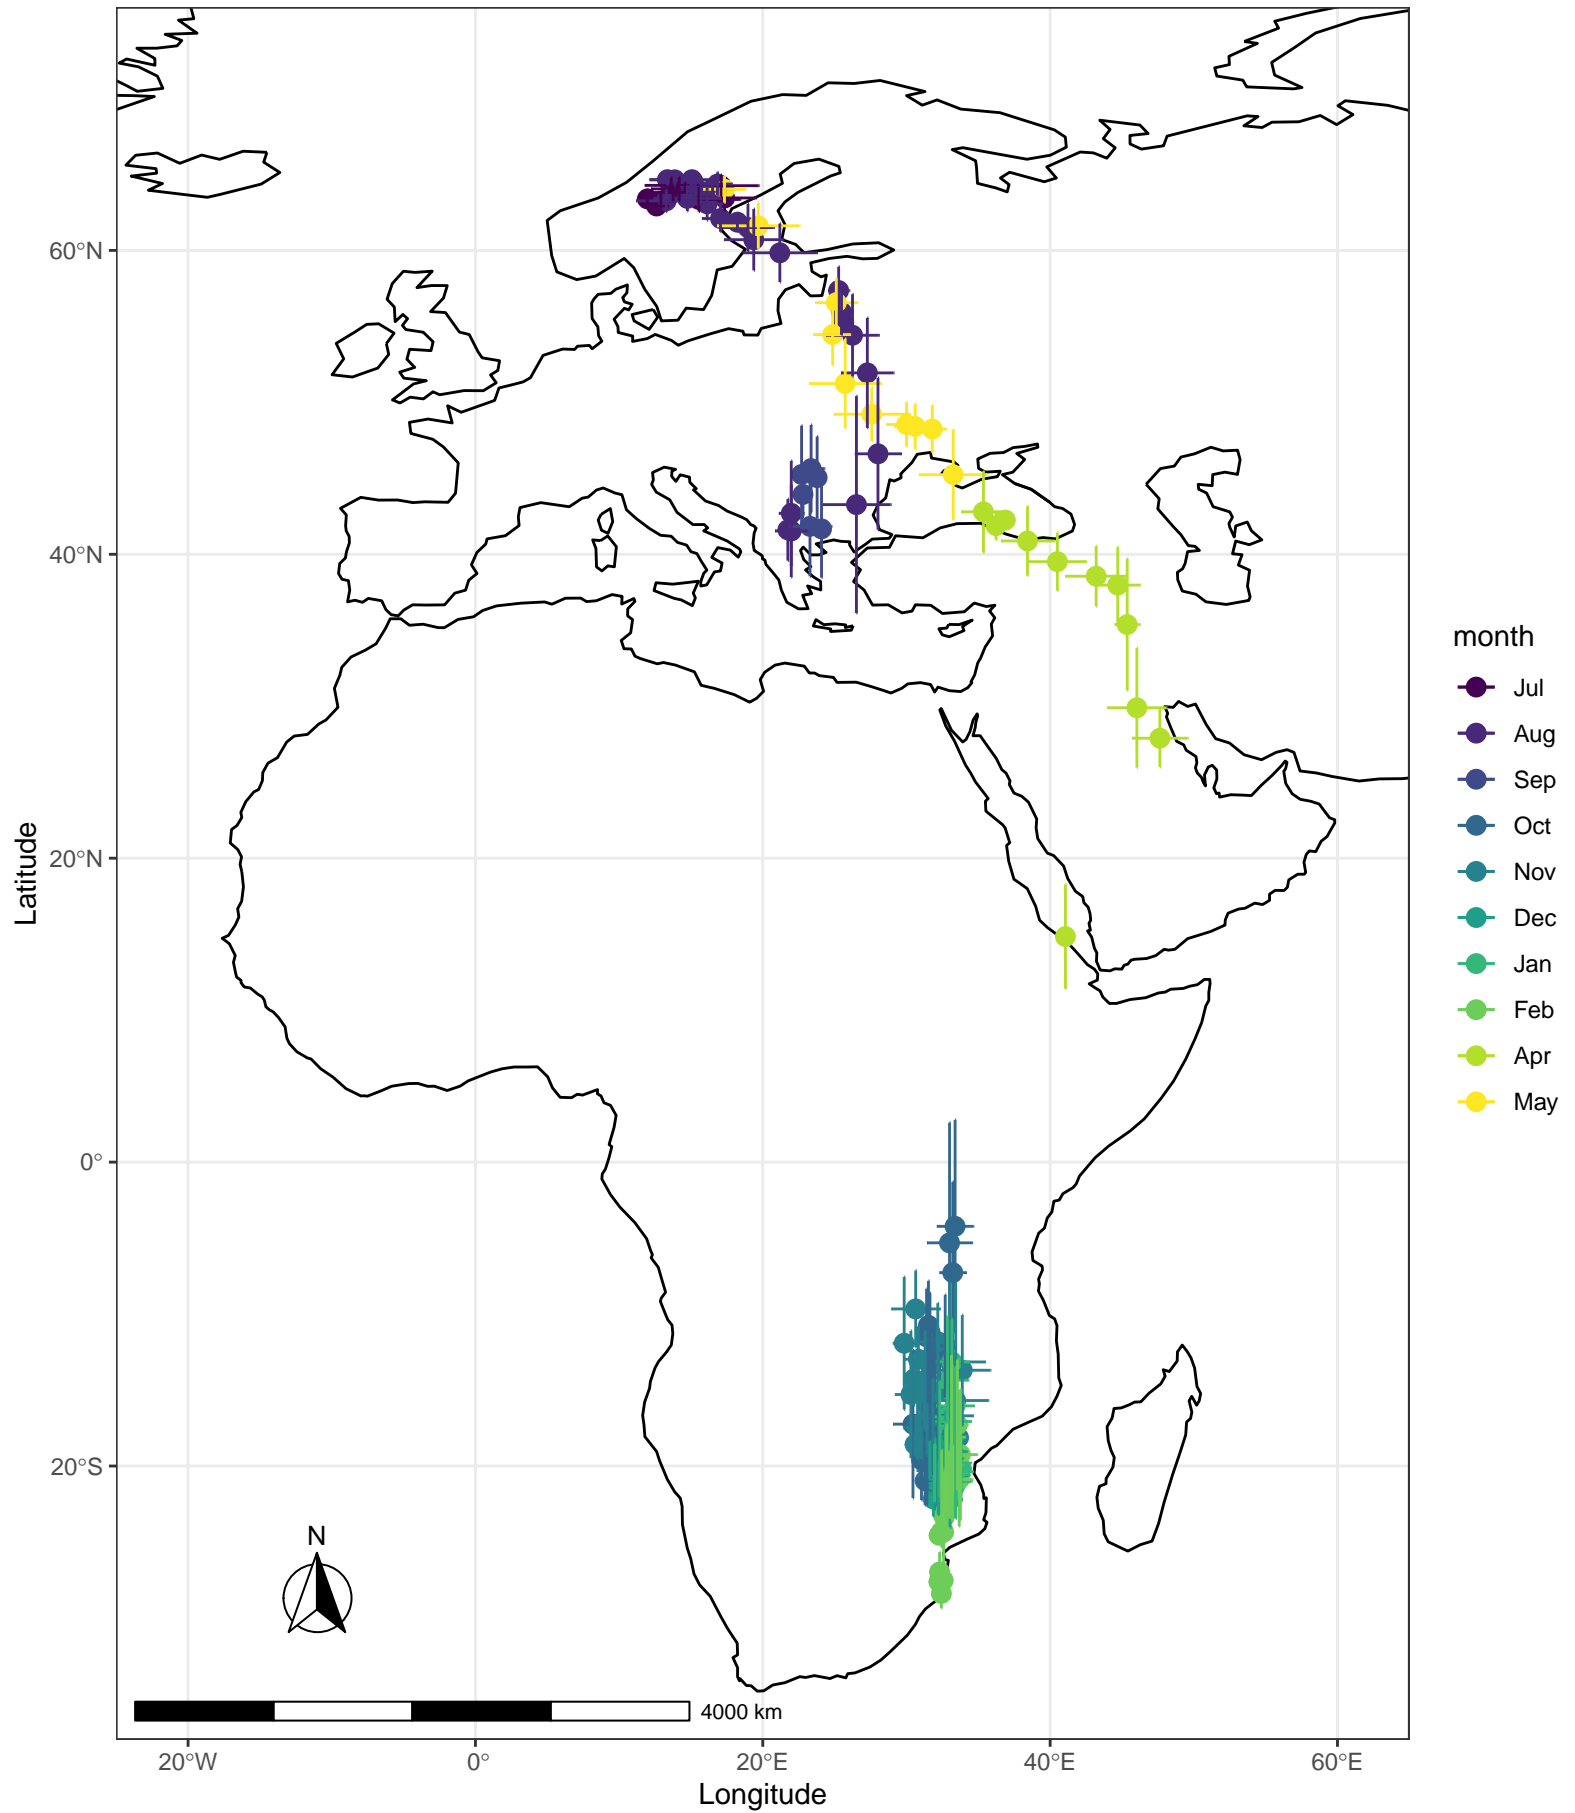

BM669

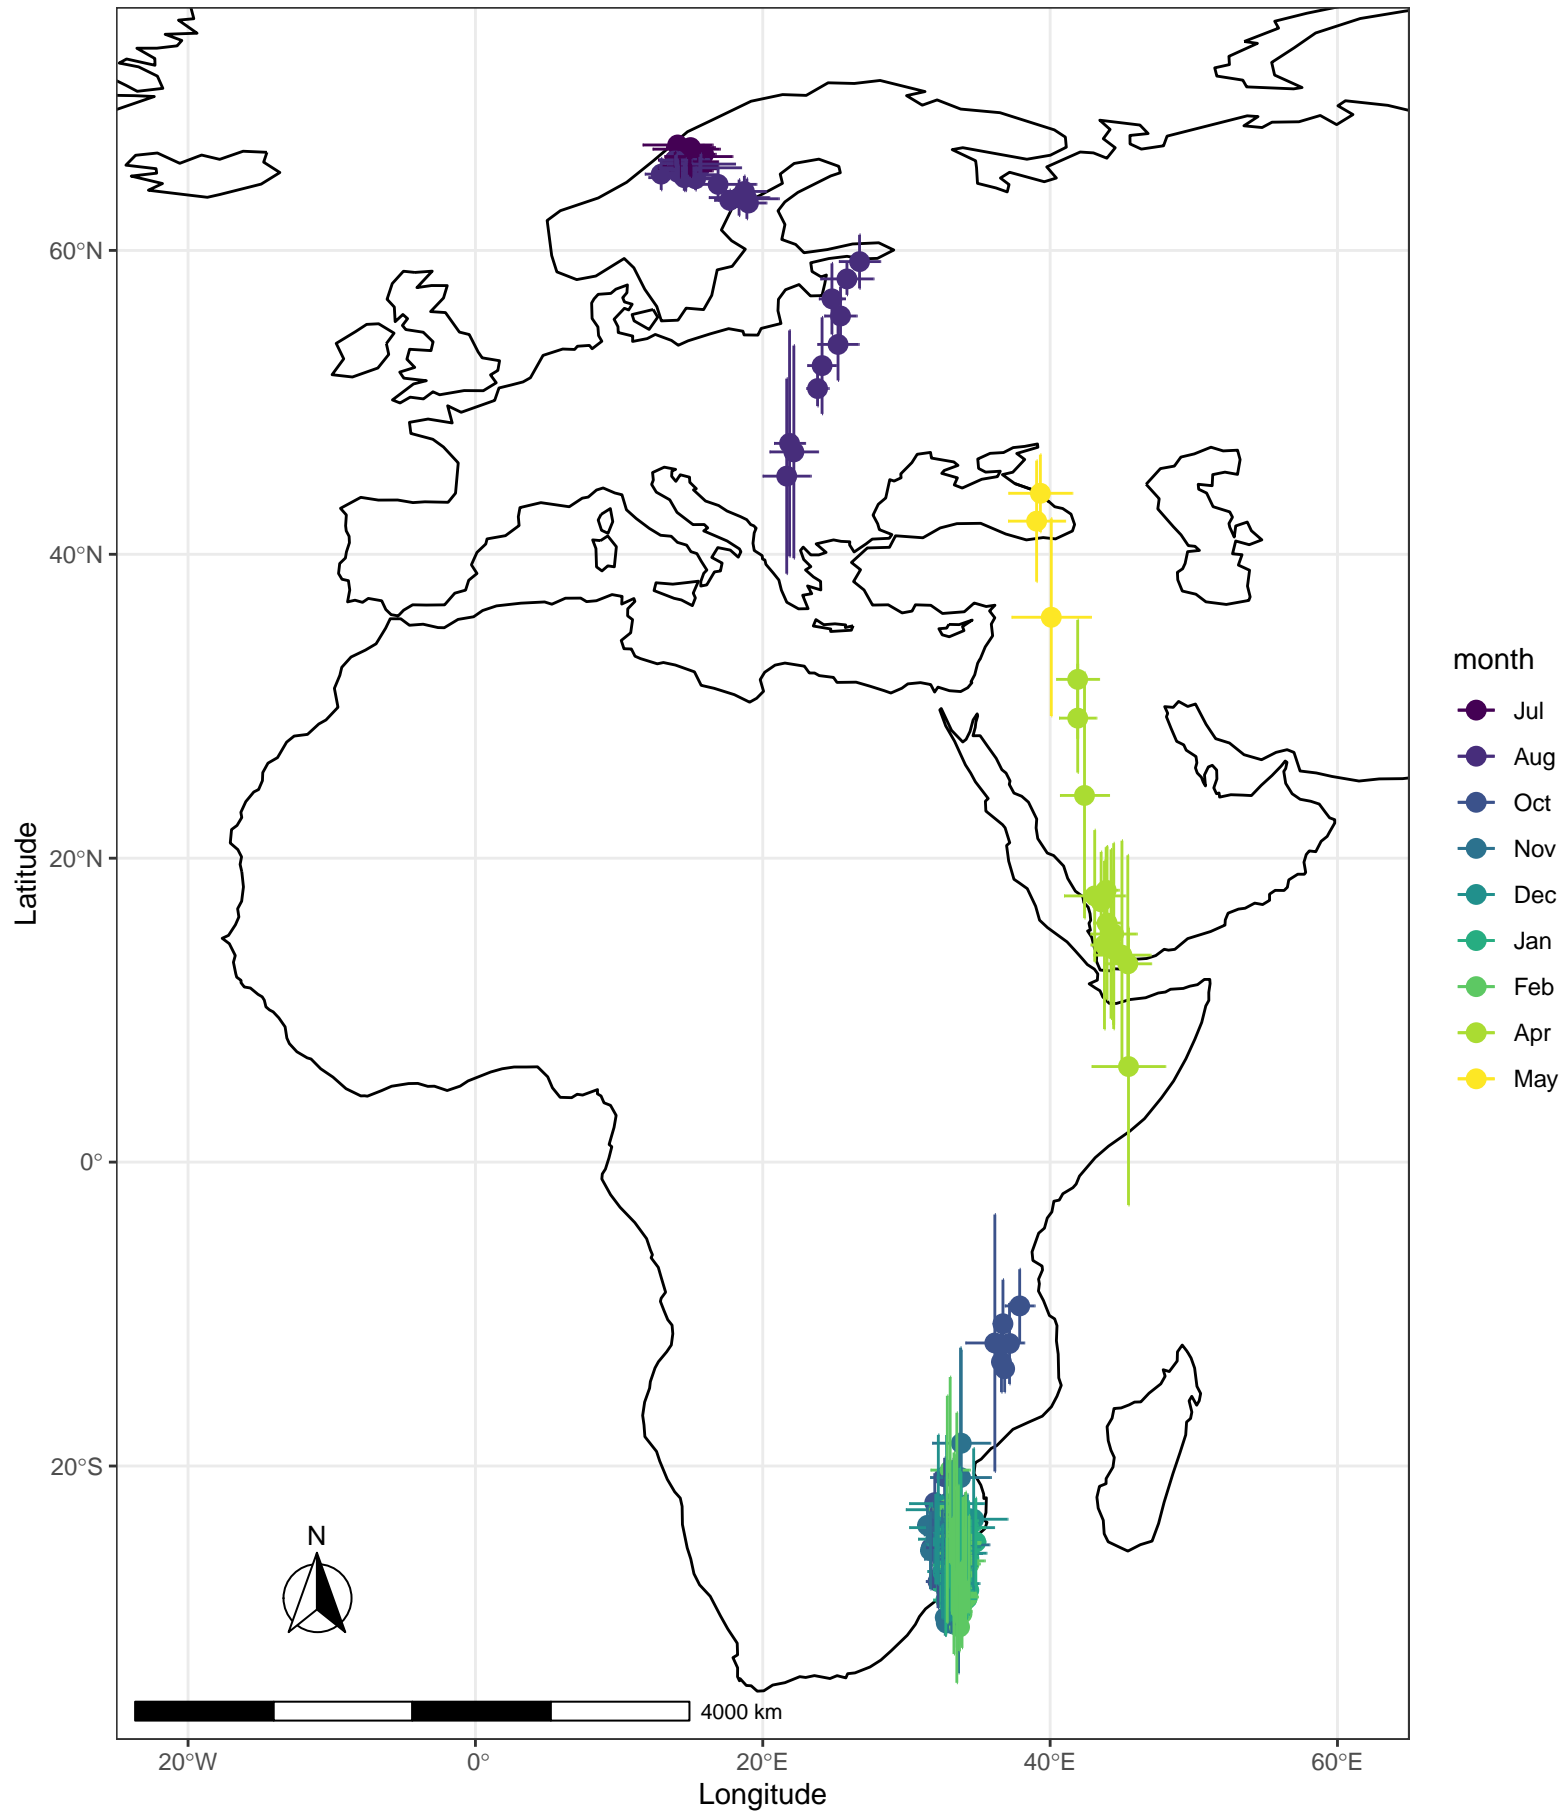

BM659

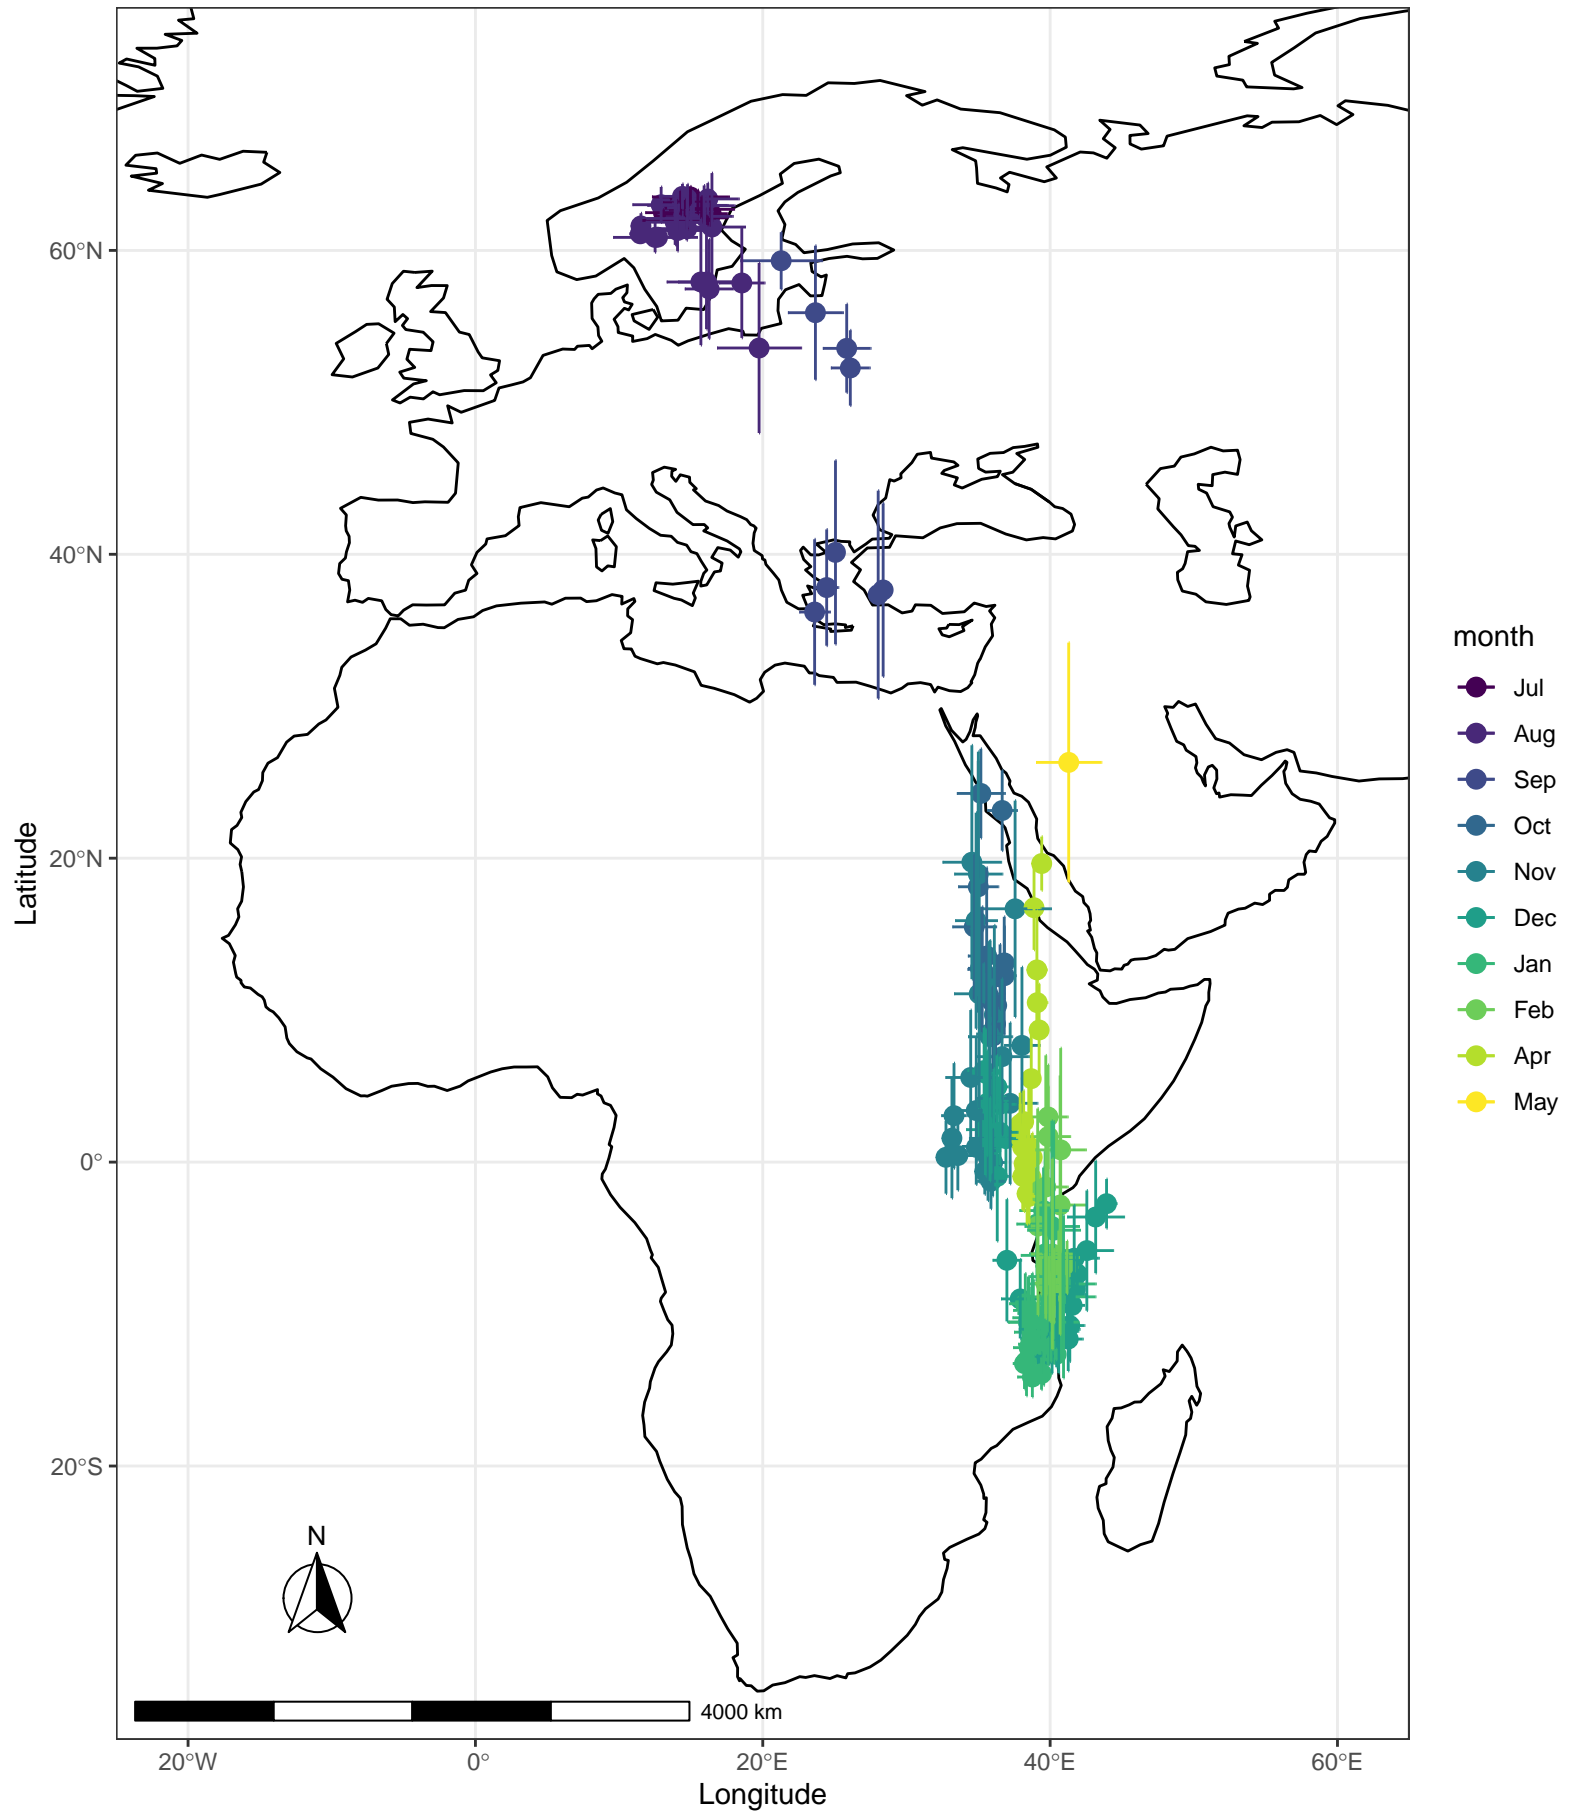

BM589

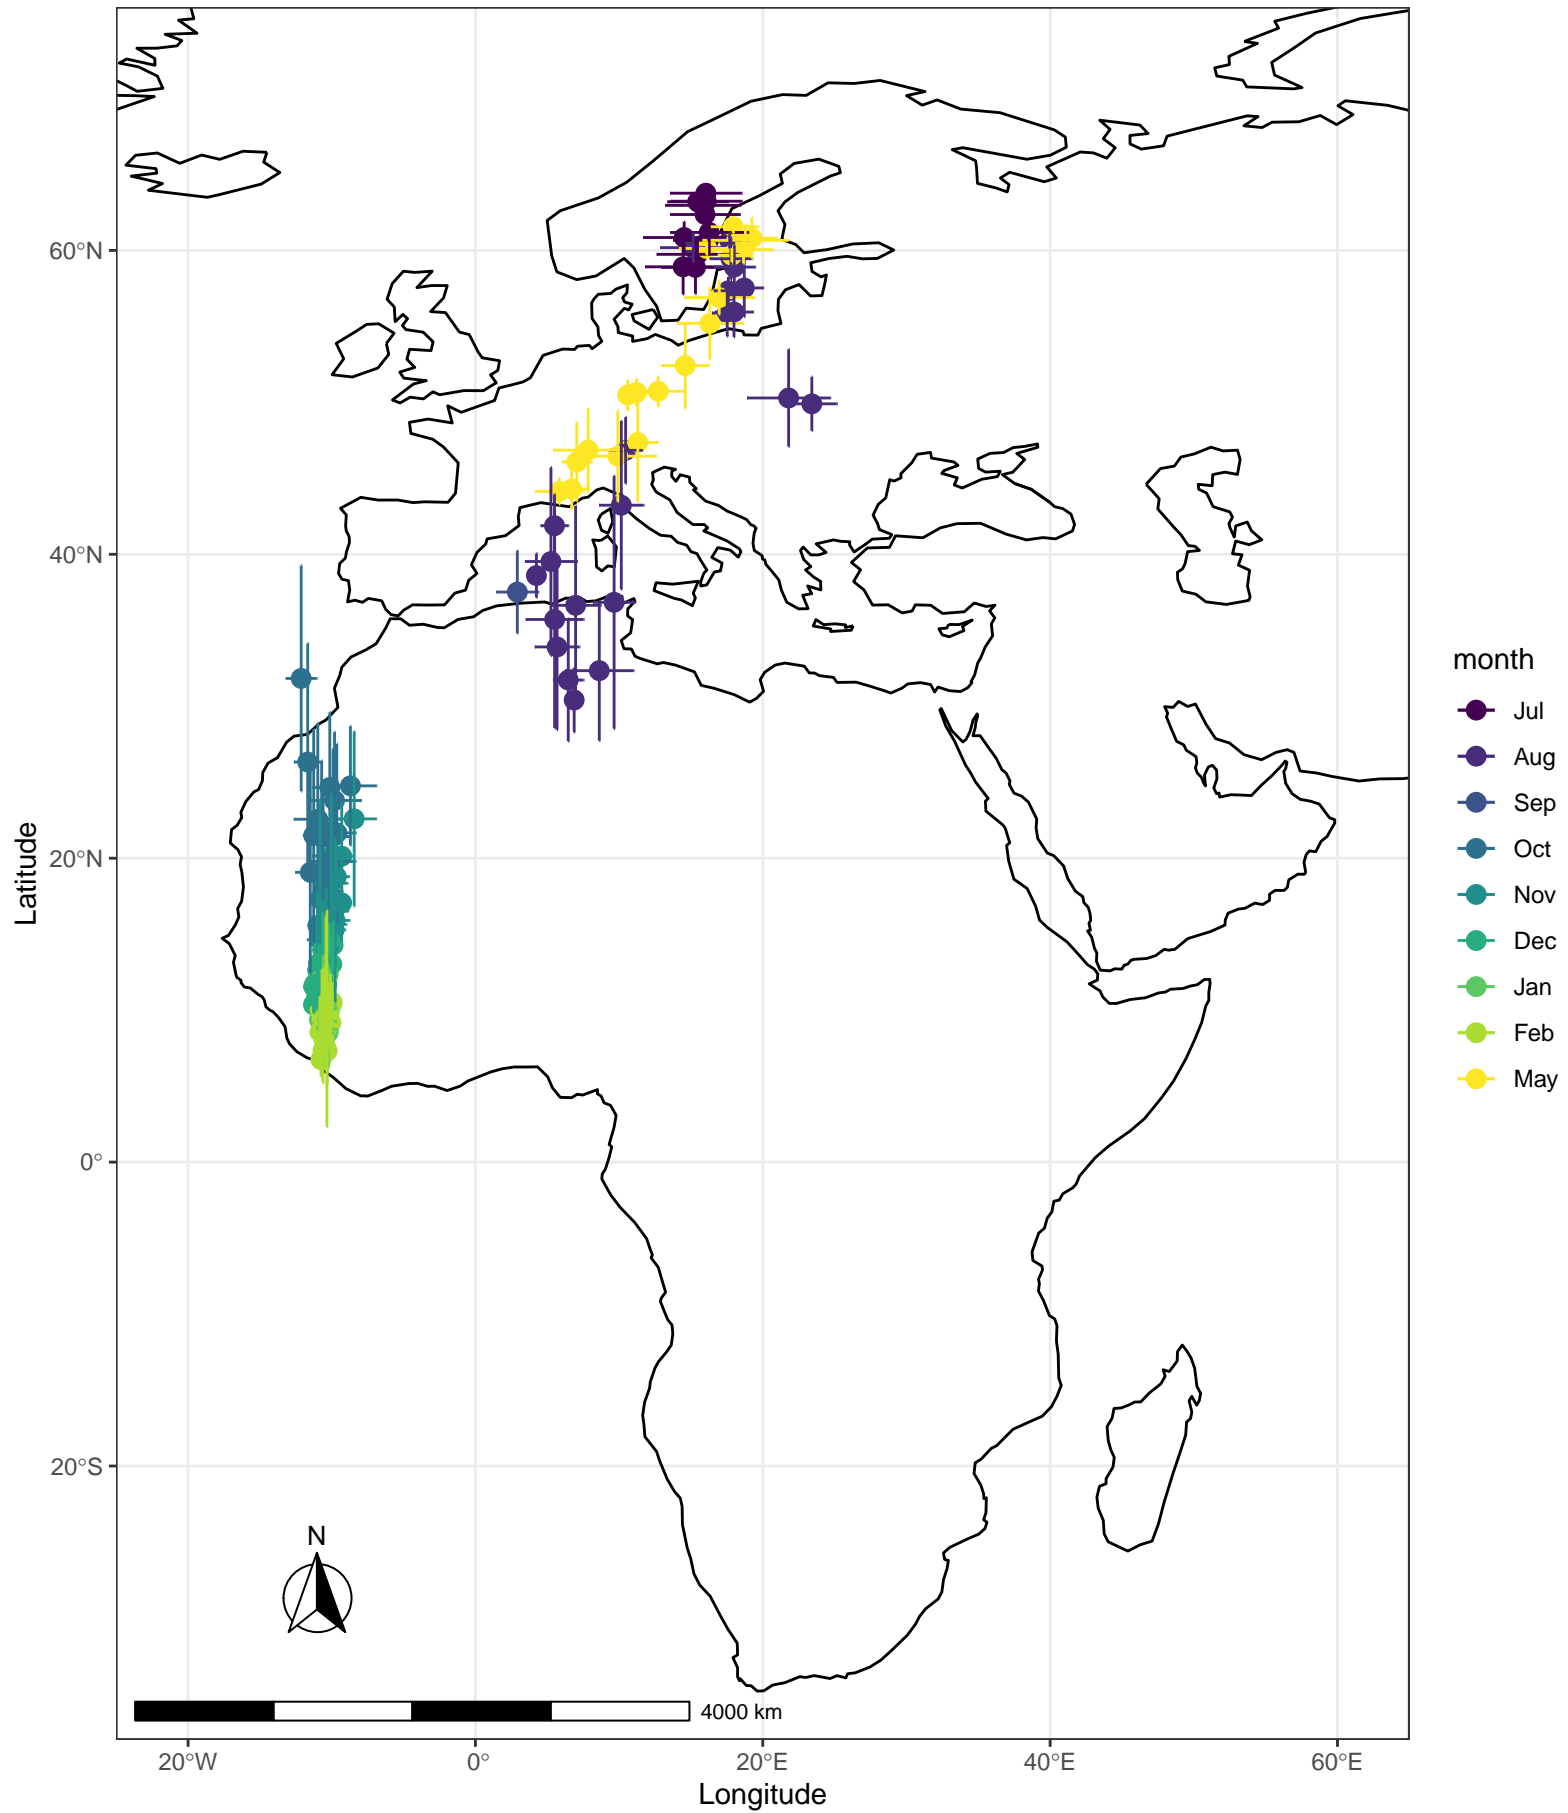

BM672

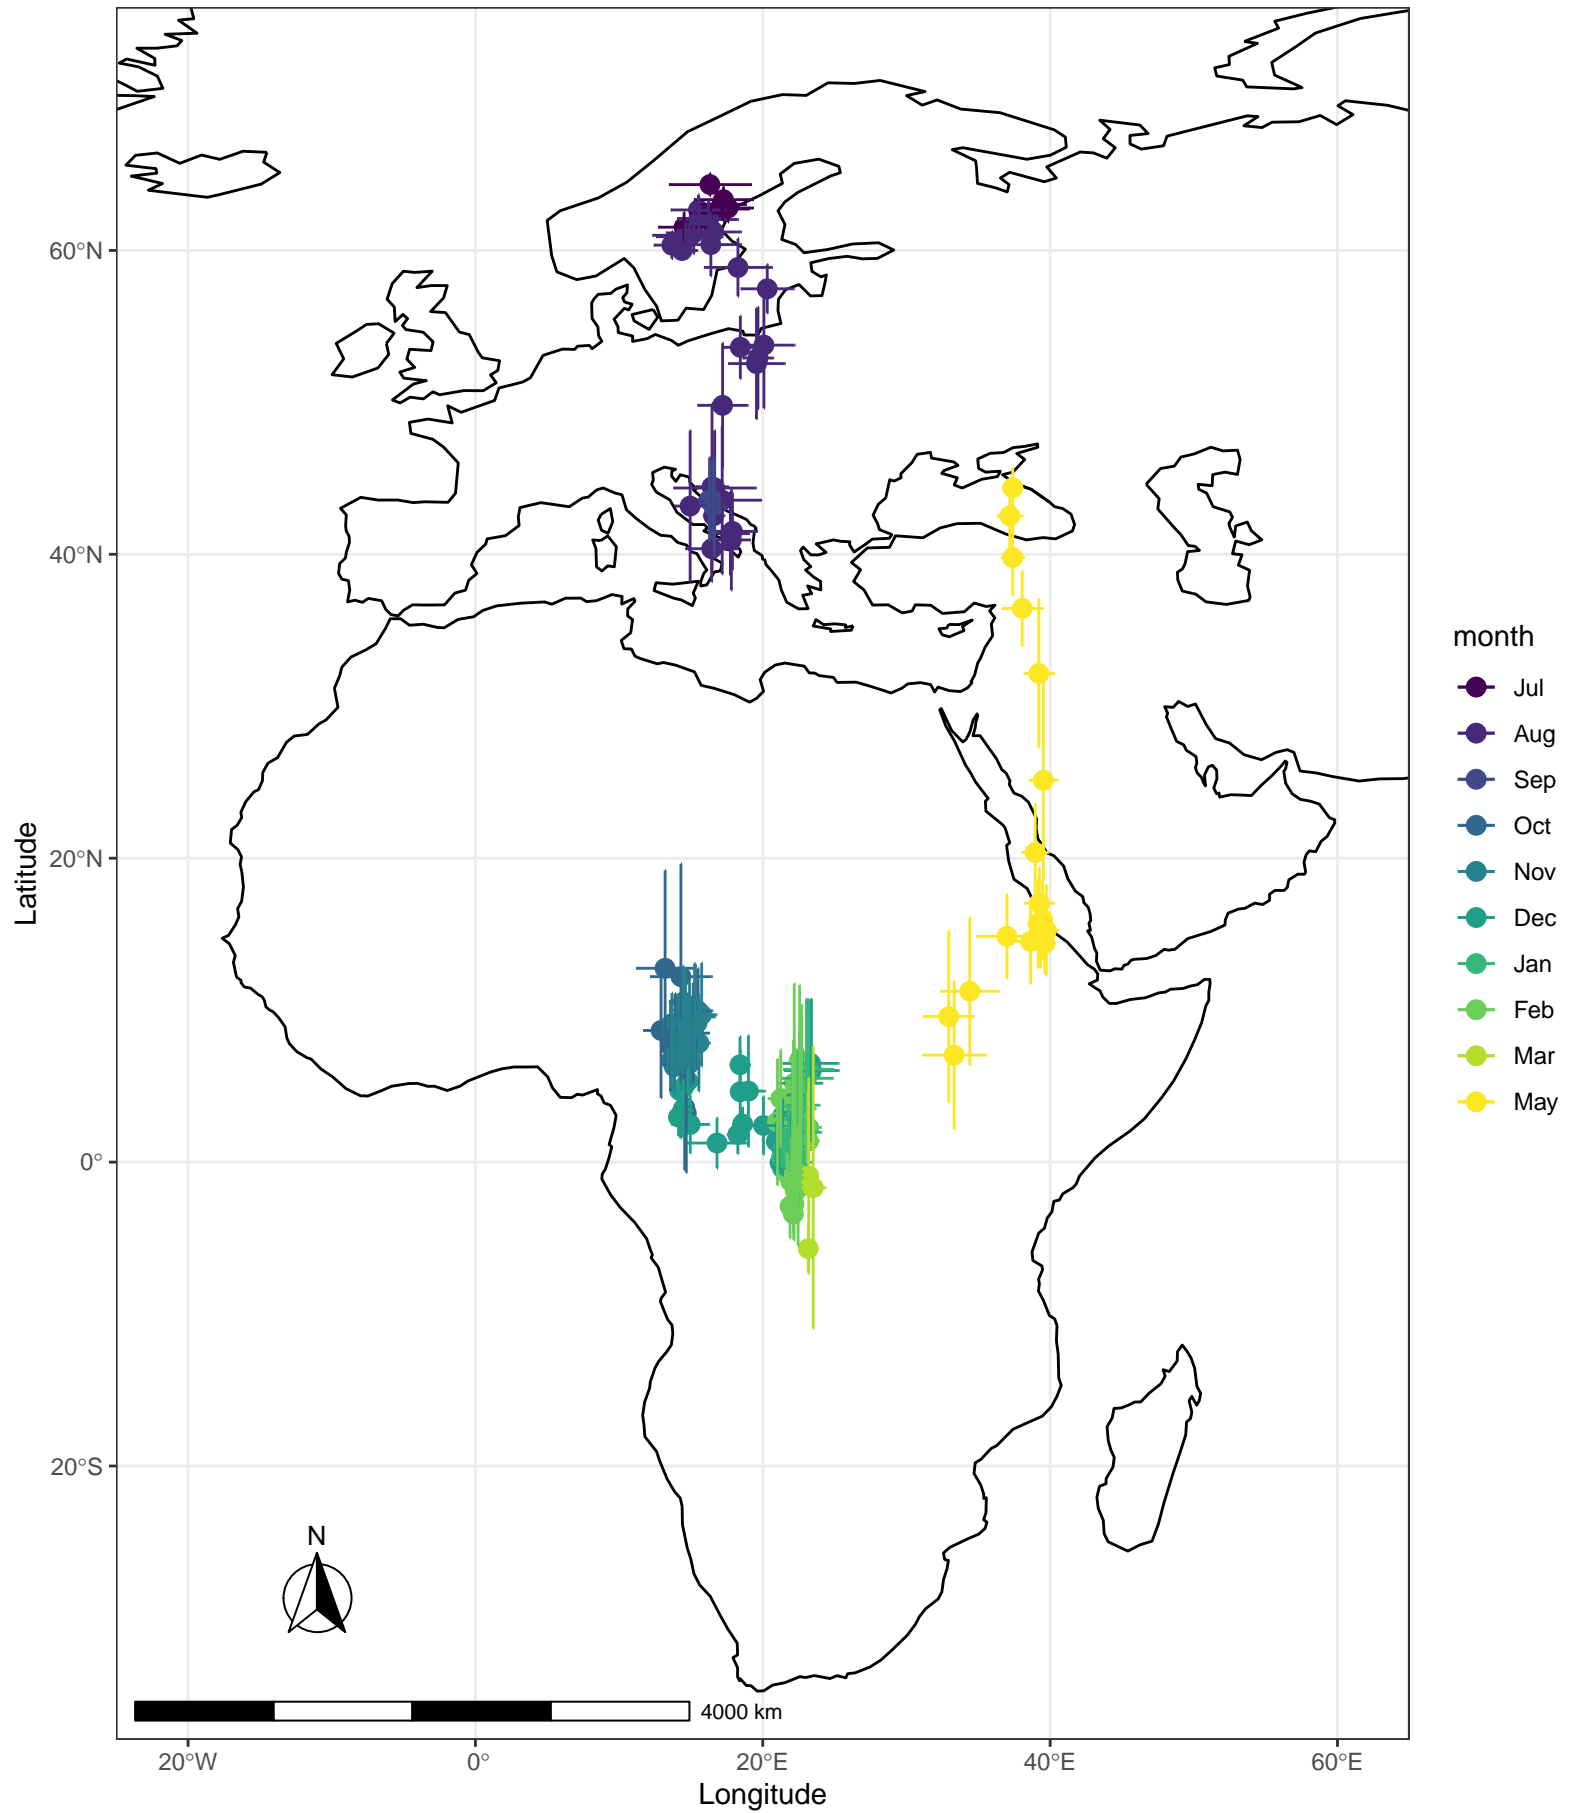

BM583

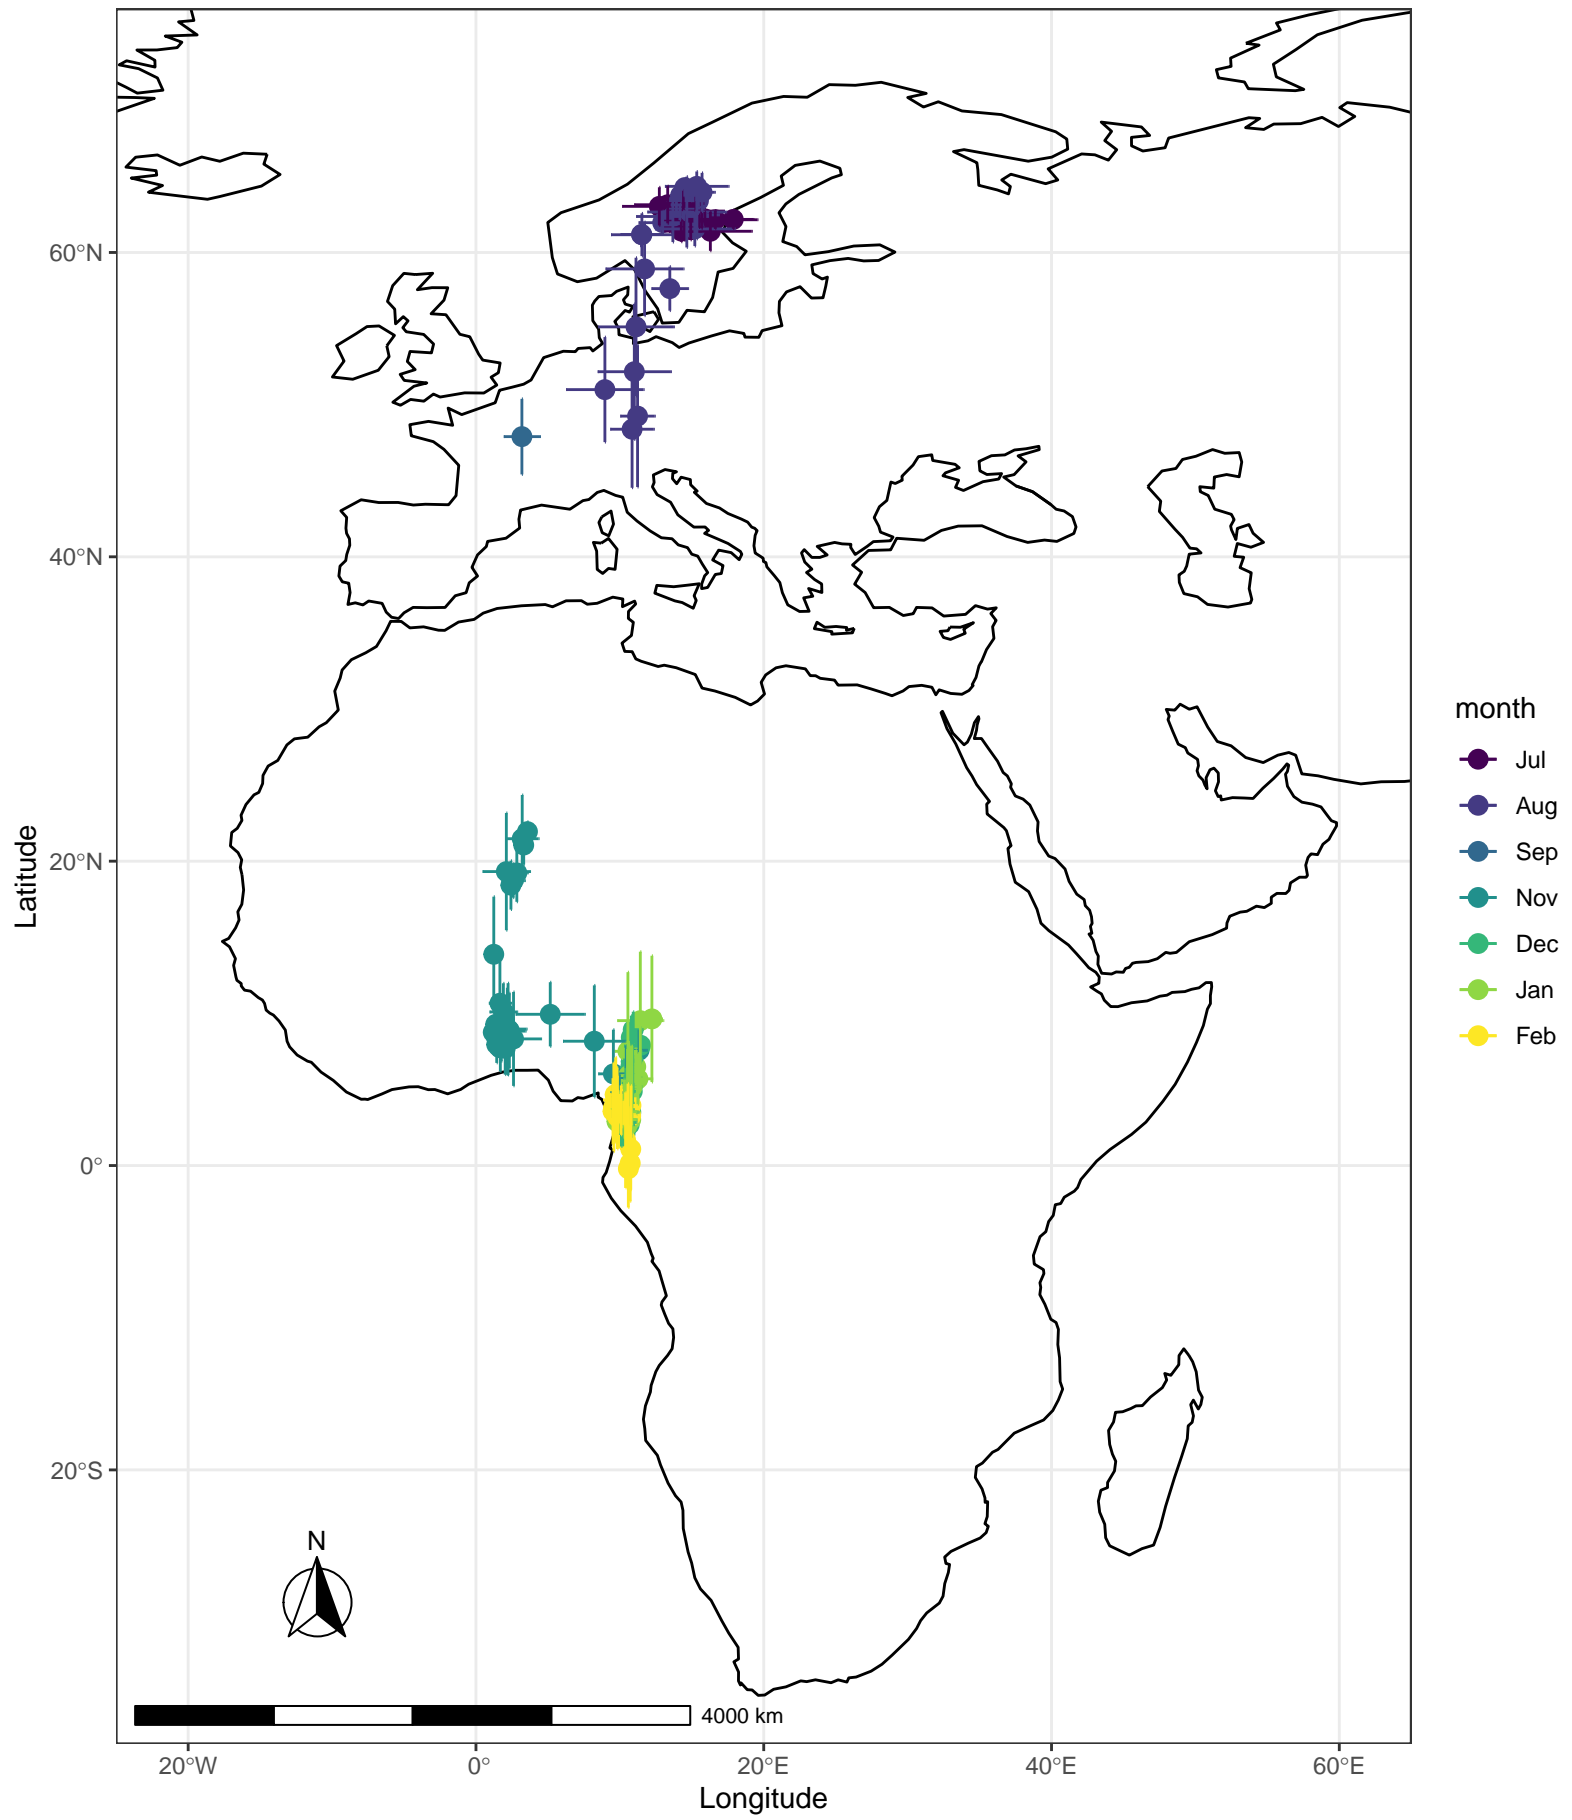

BN151

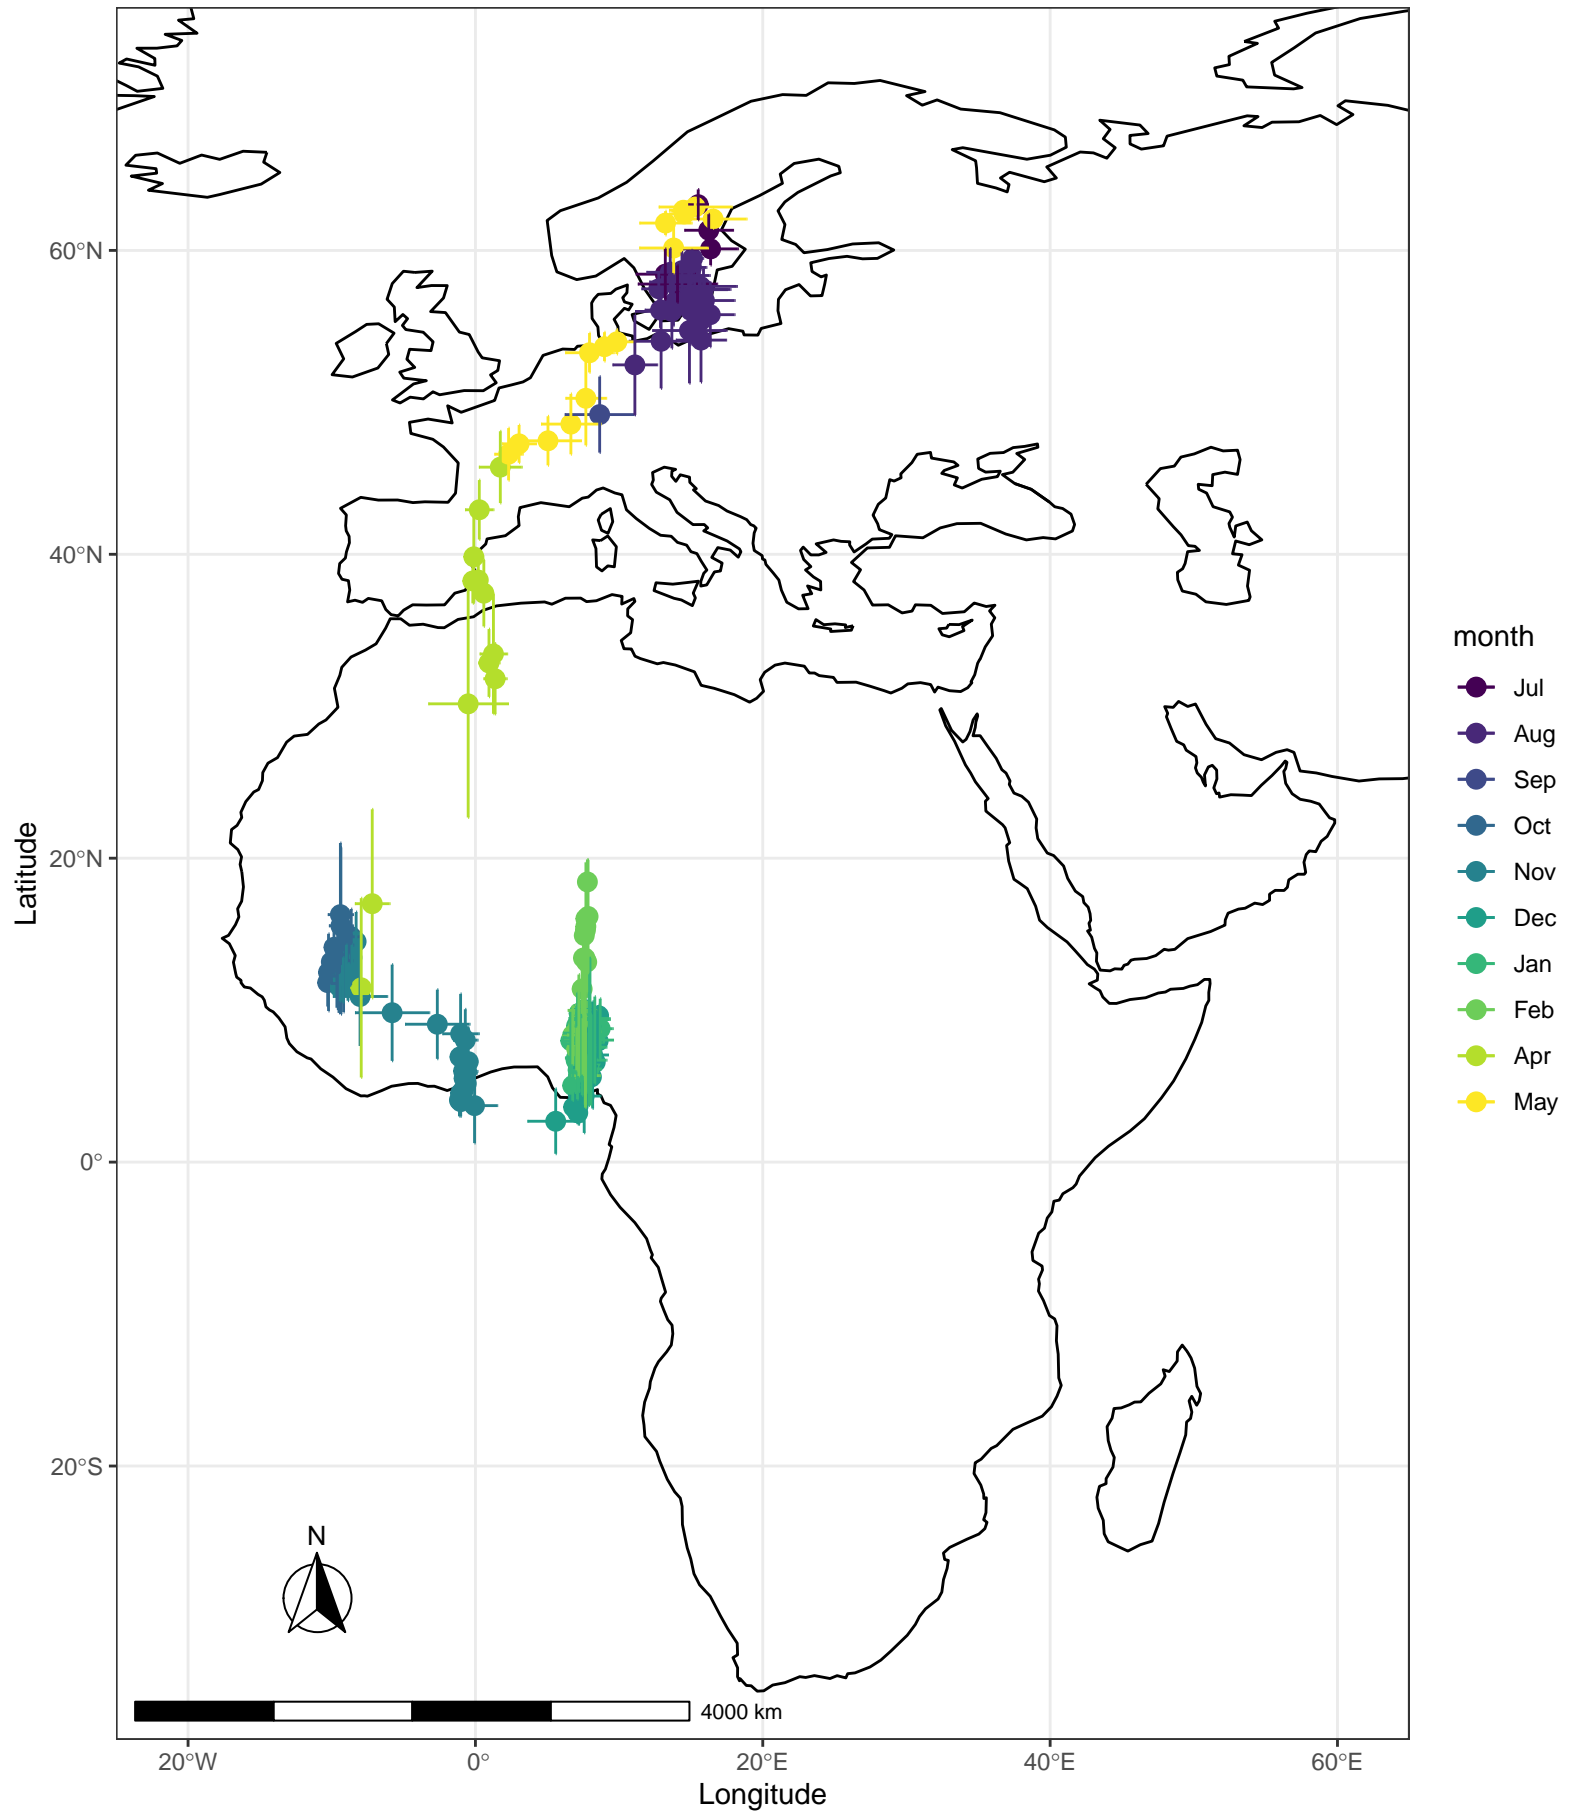

BM598

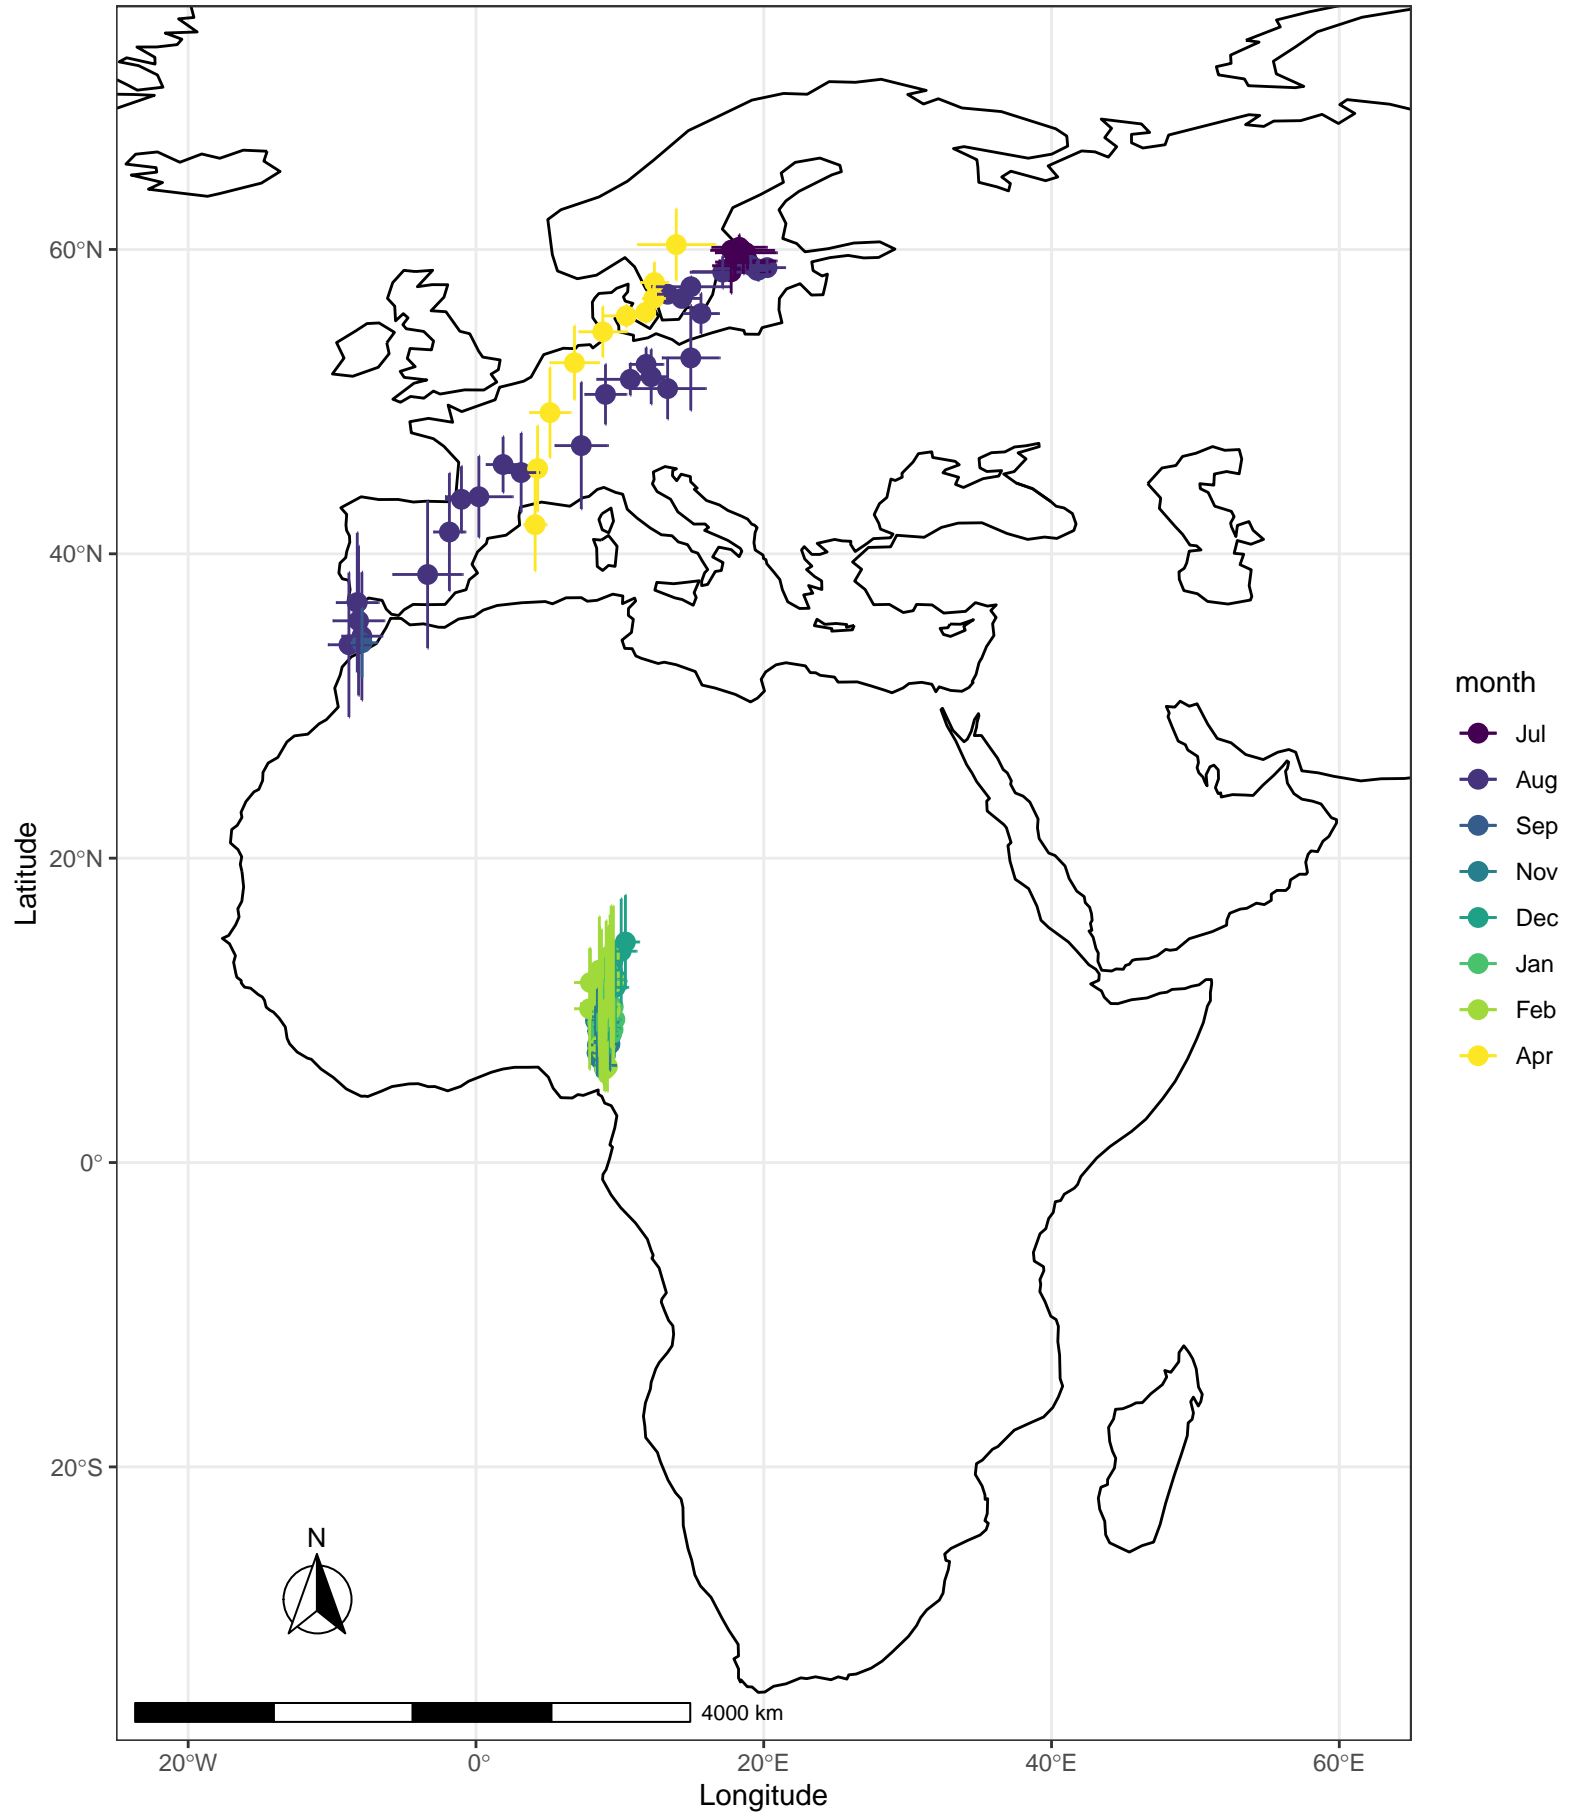



BM199

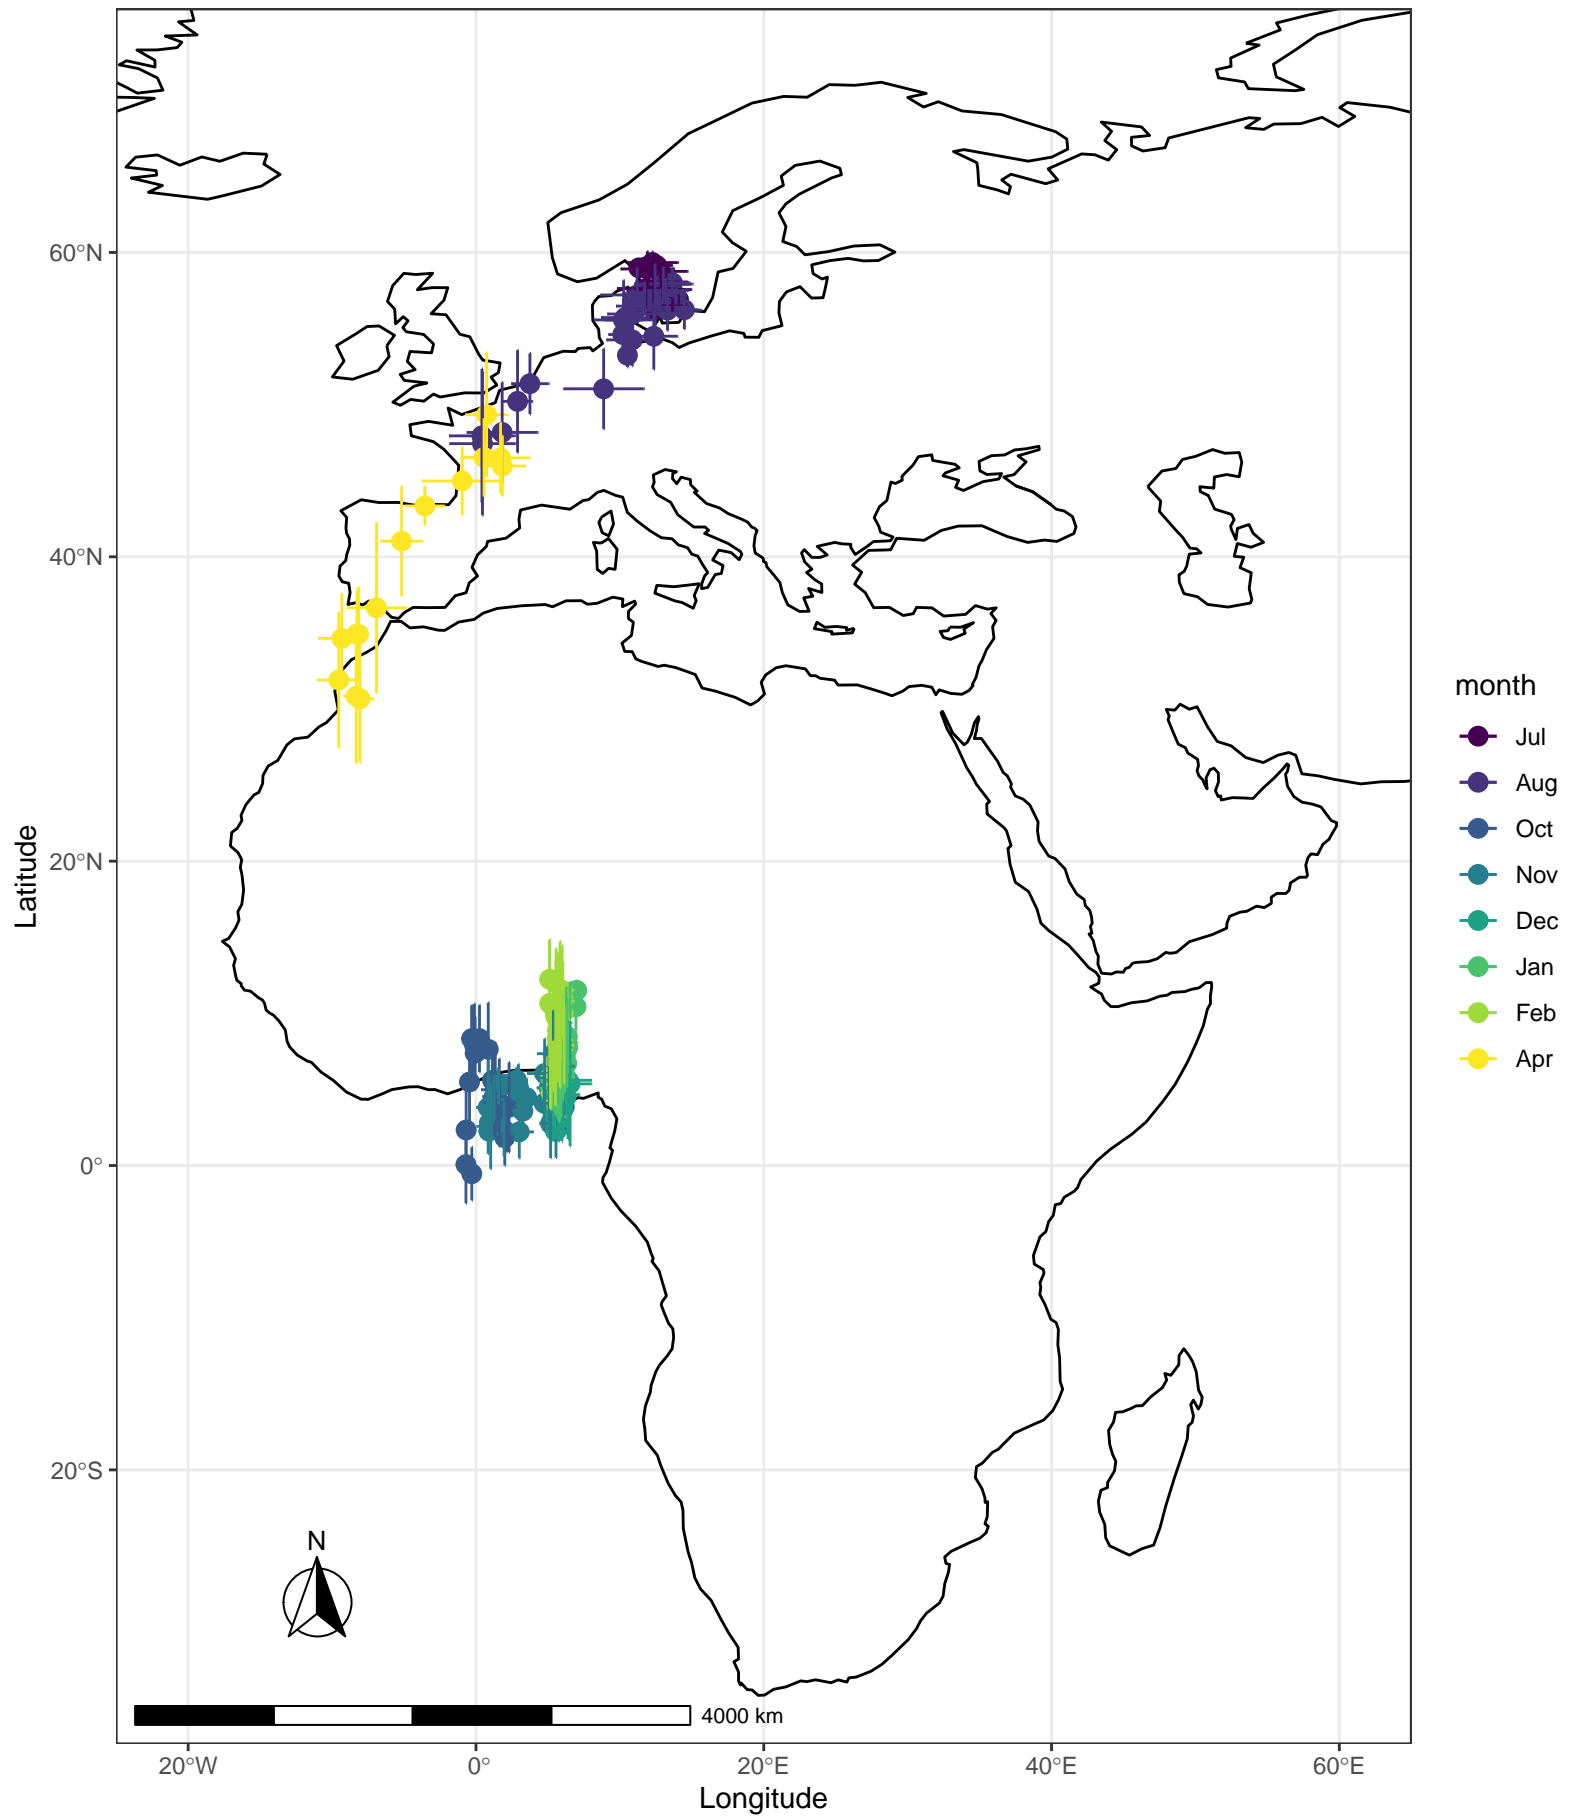

BM223

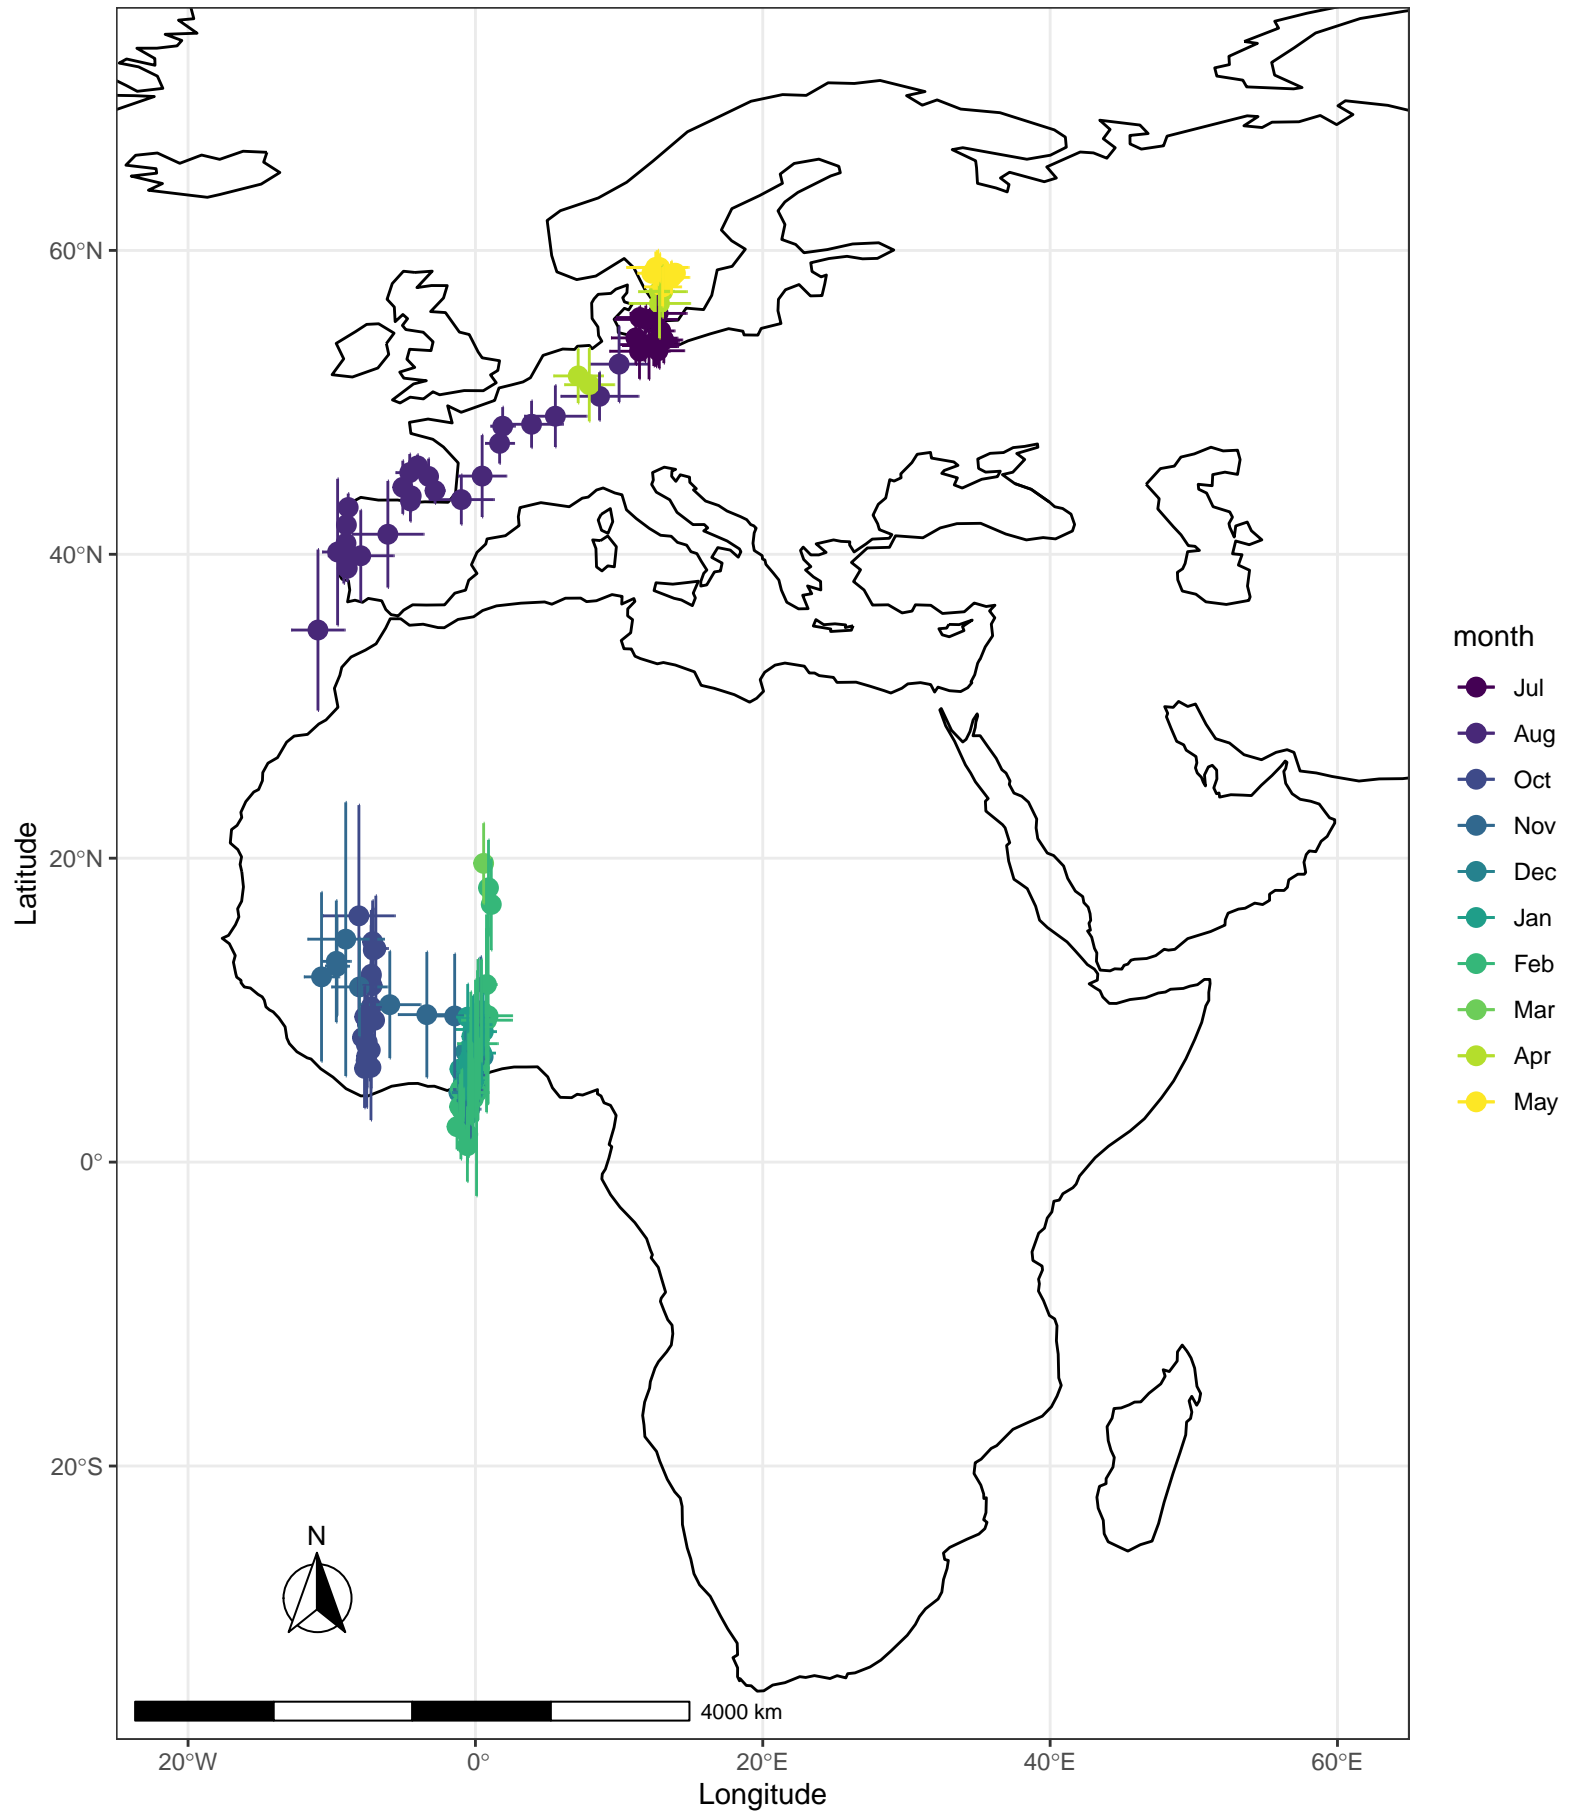

BM653

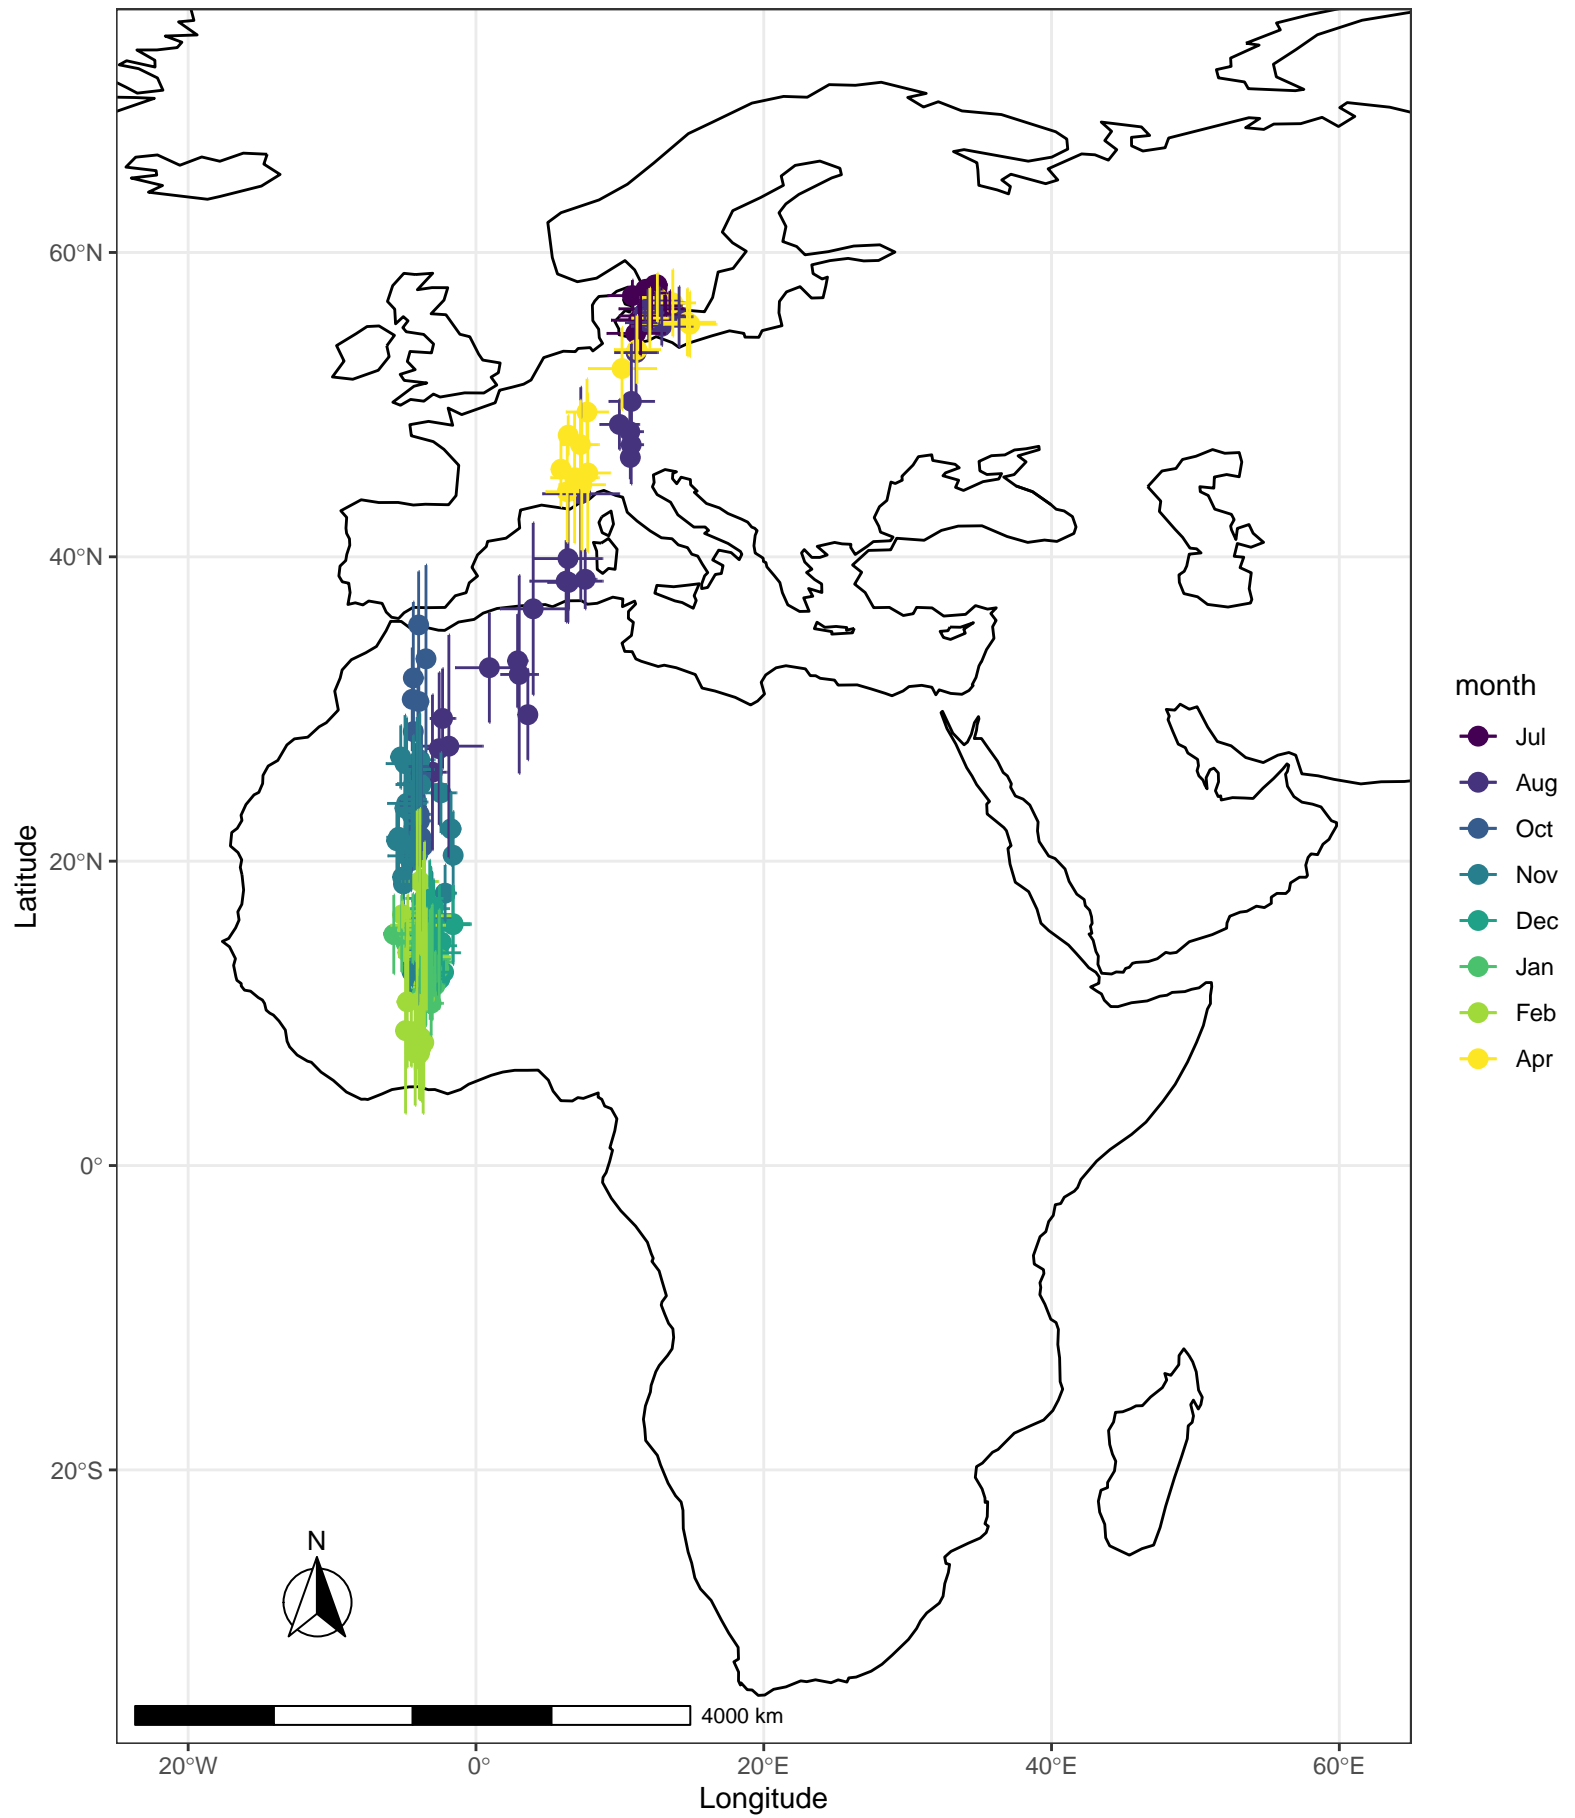

BM244

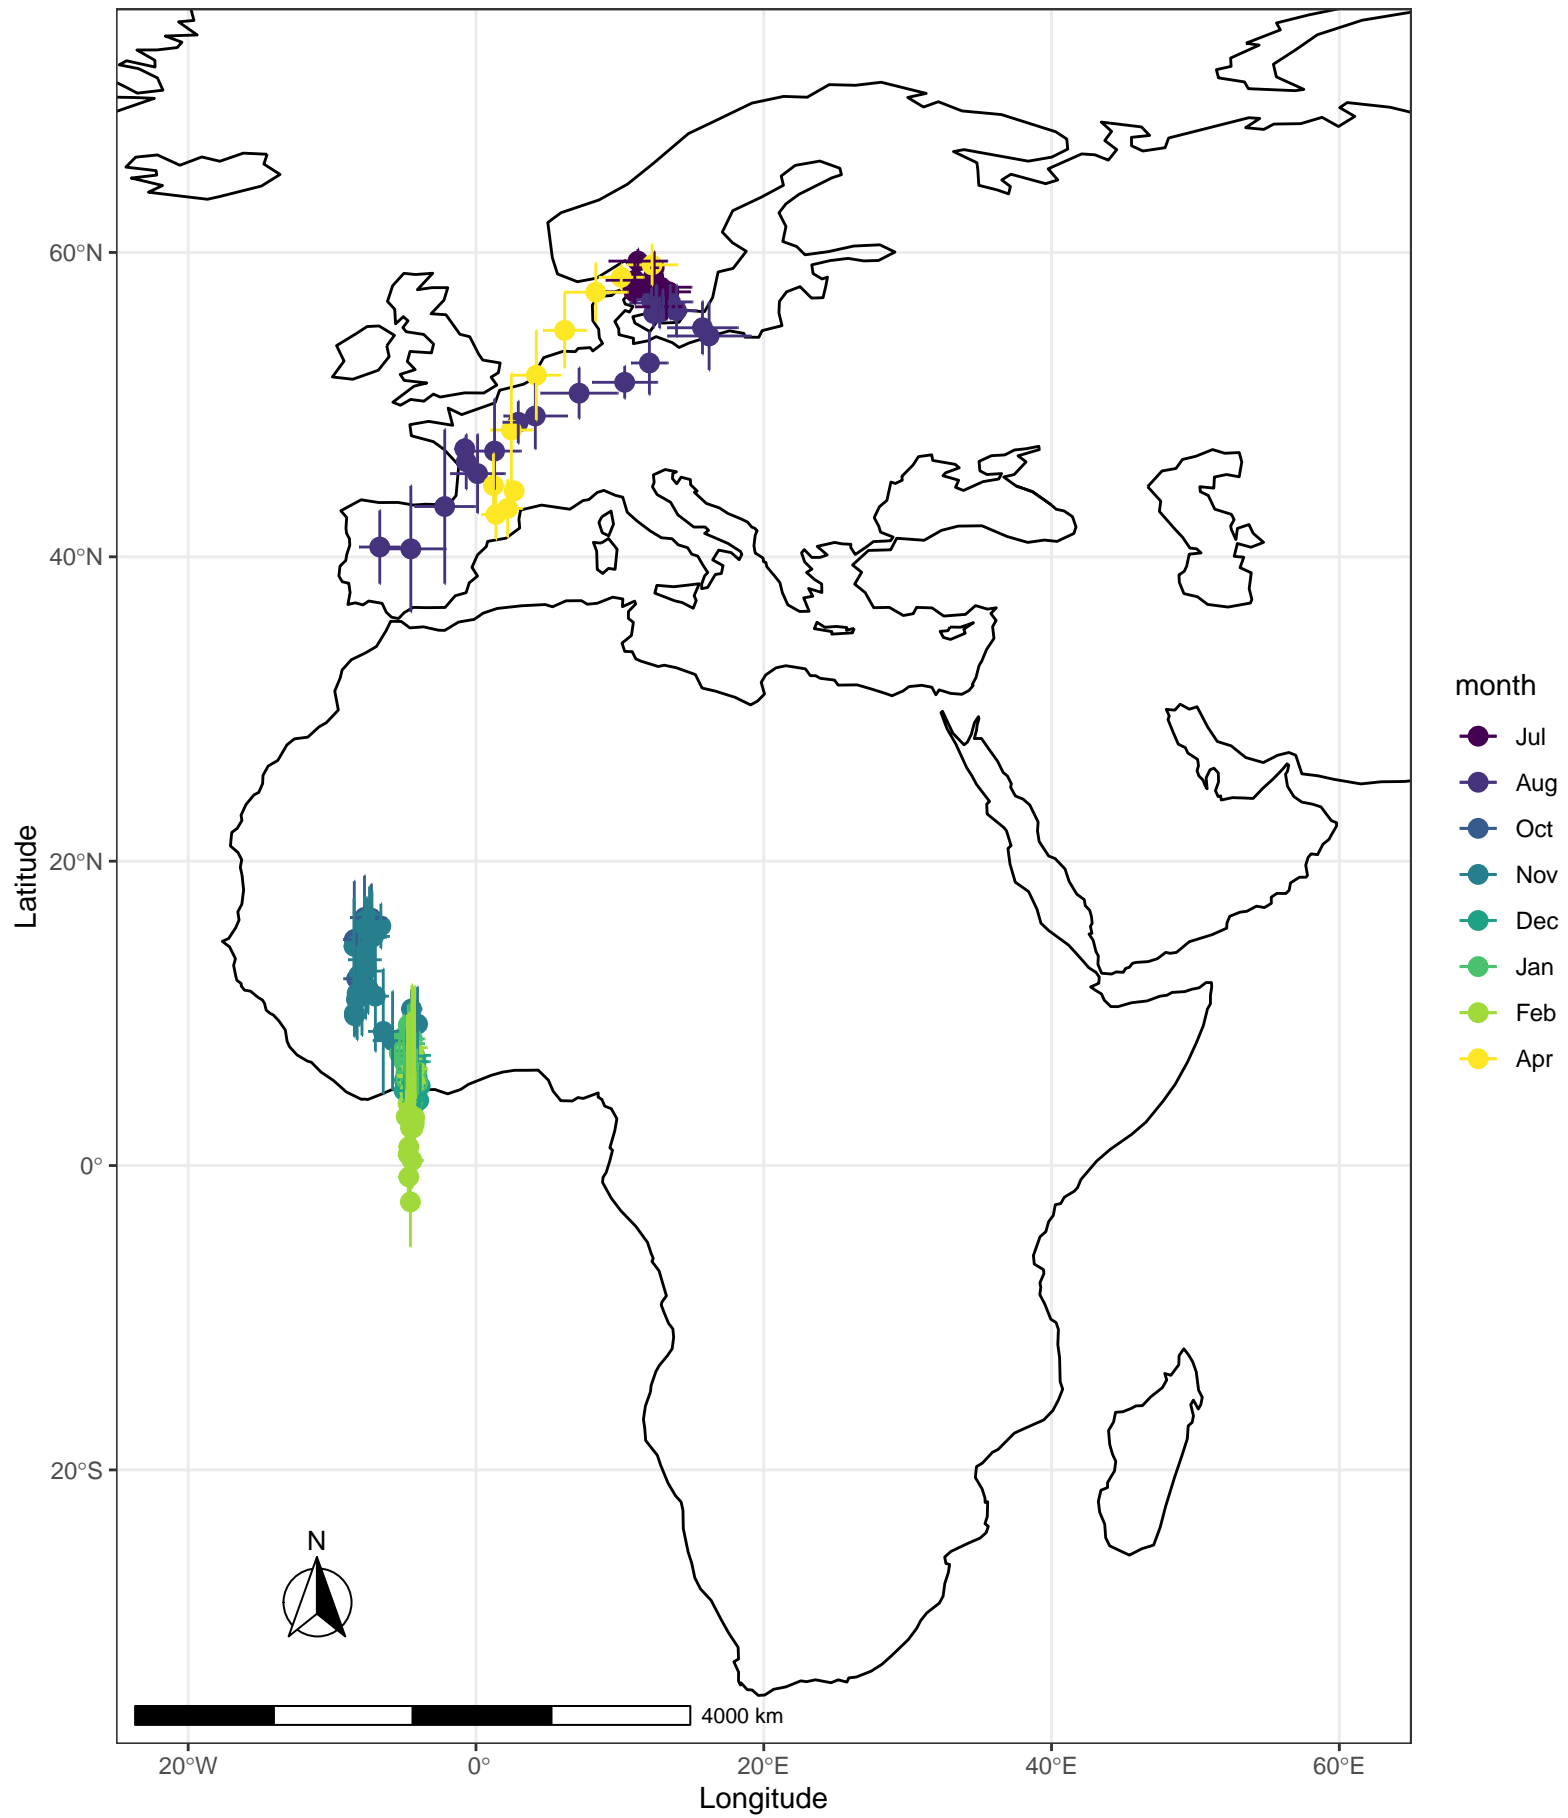

BM228

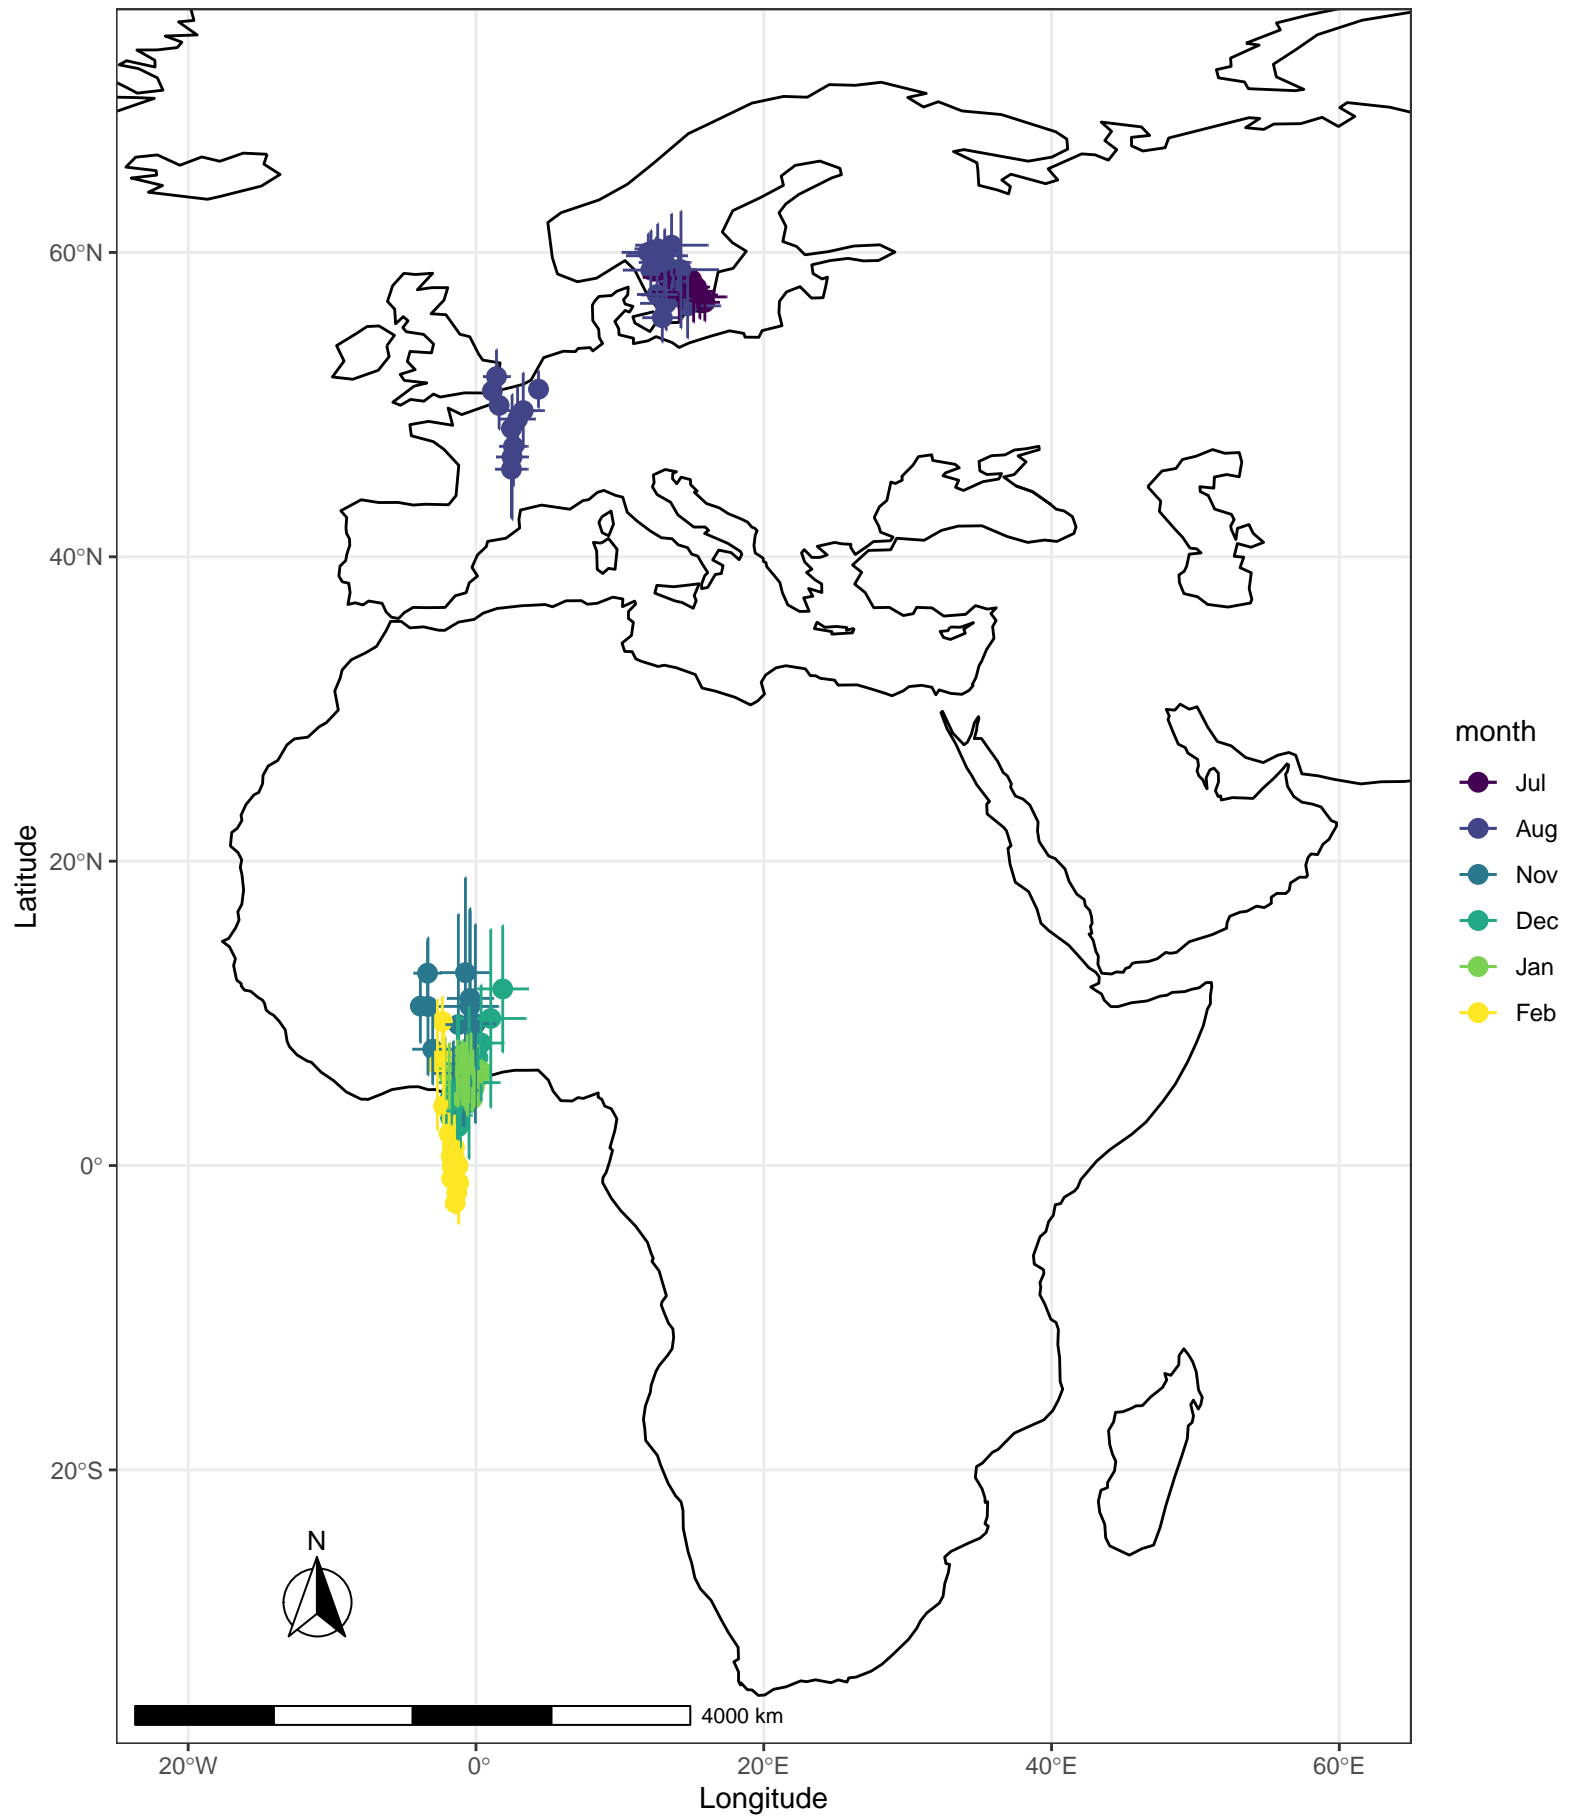

BM216

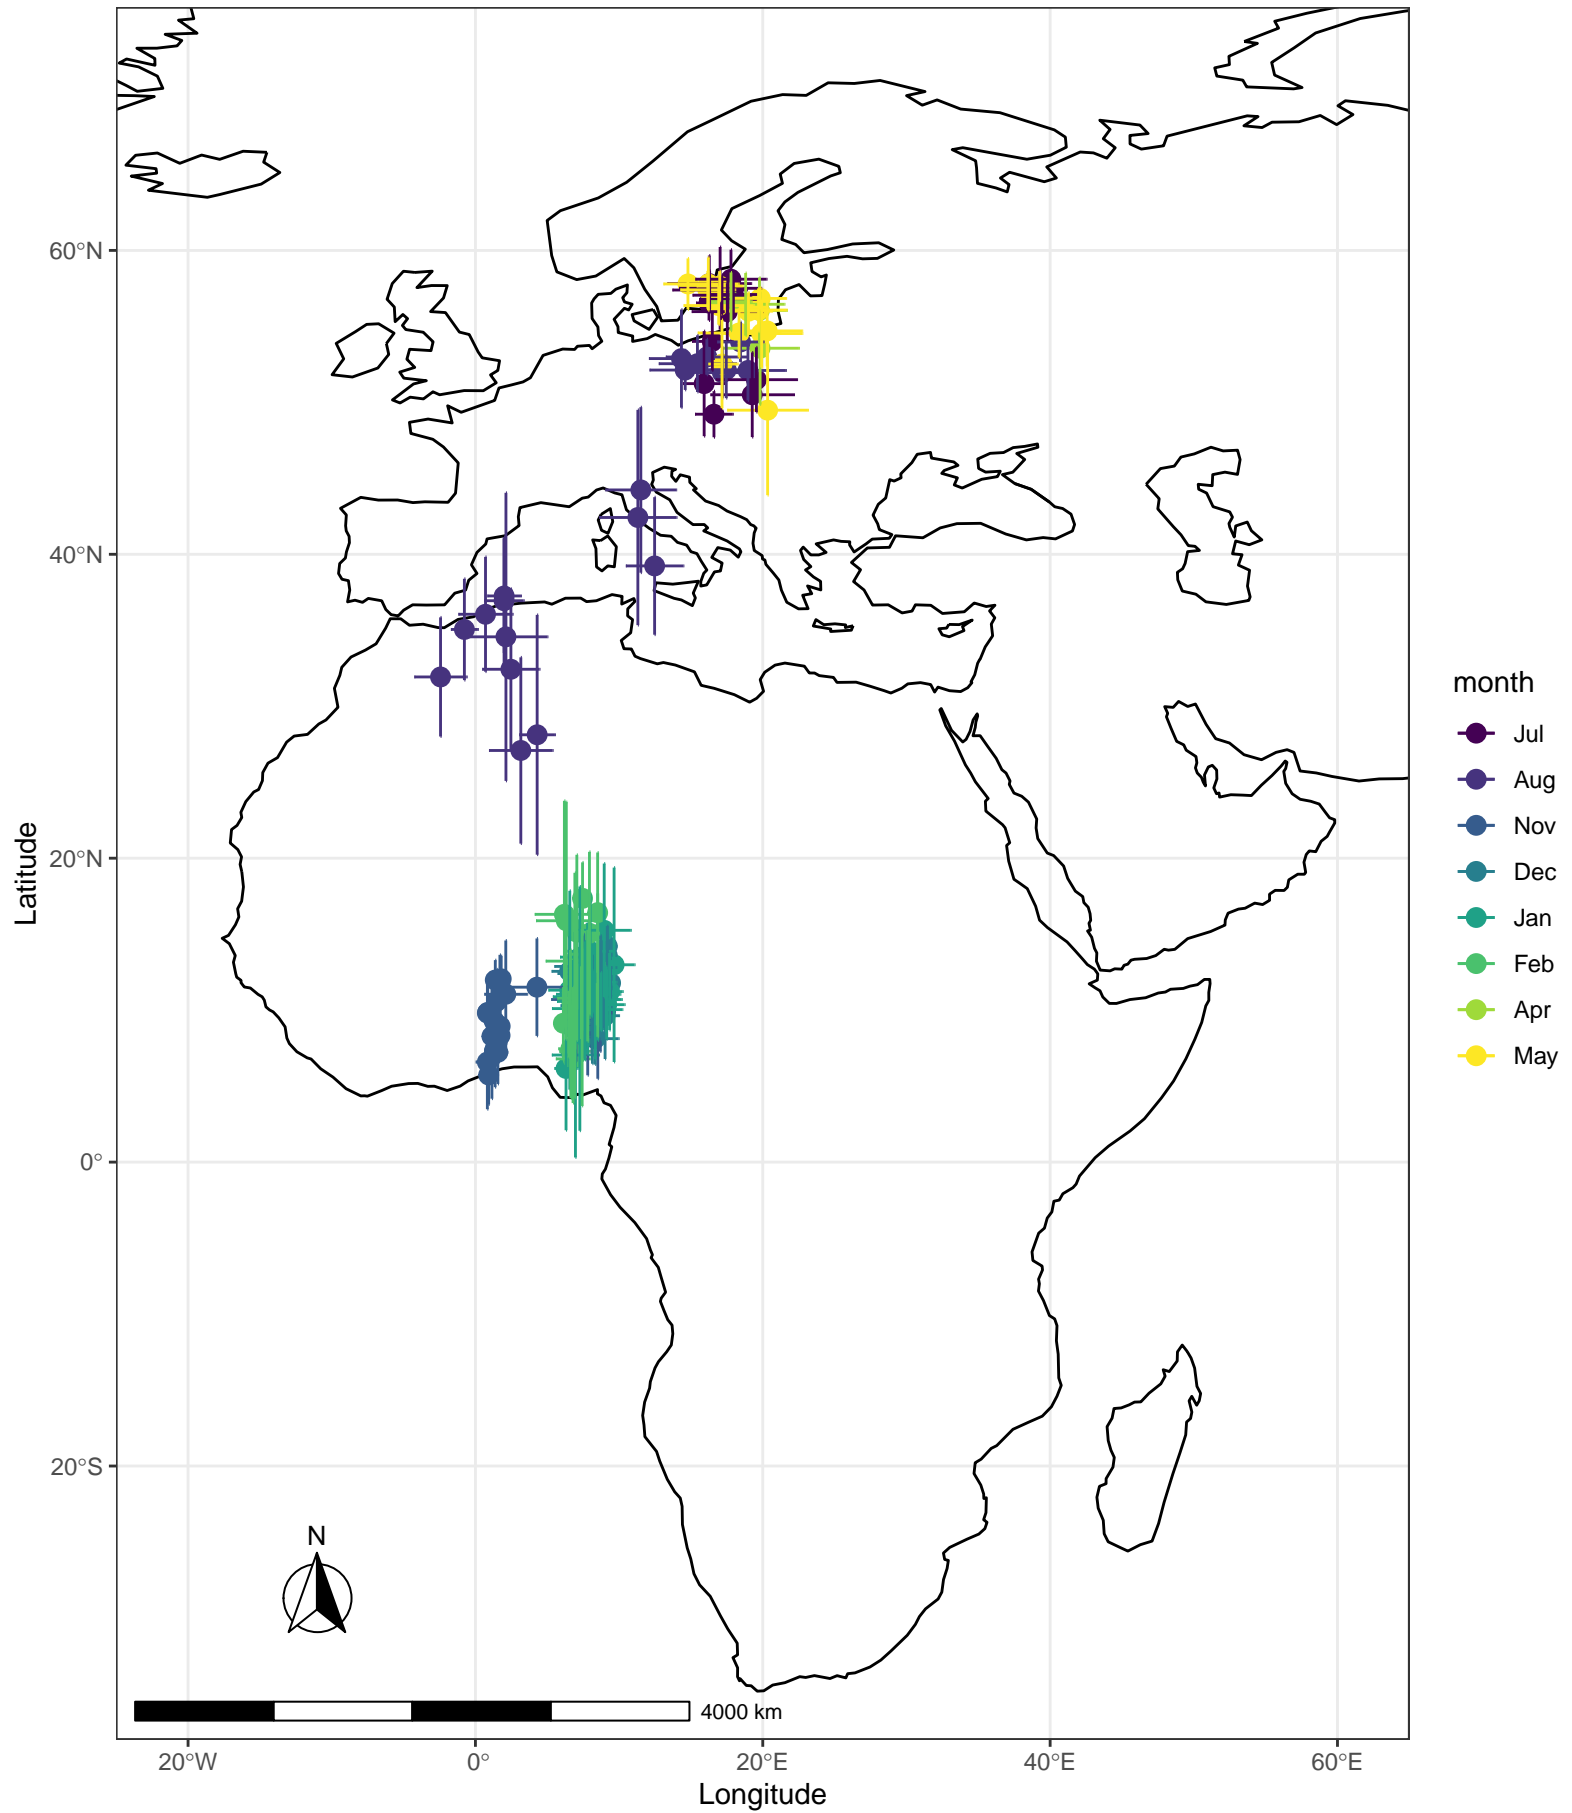

BM230

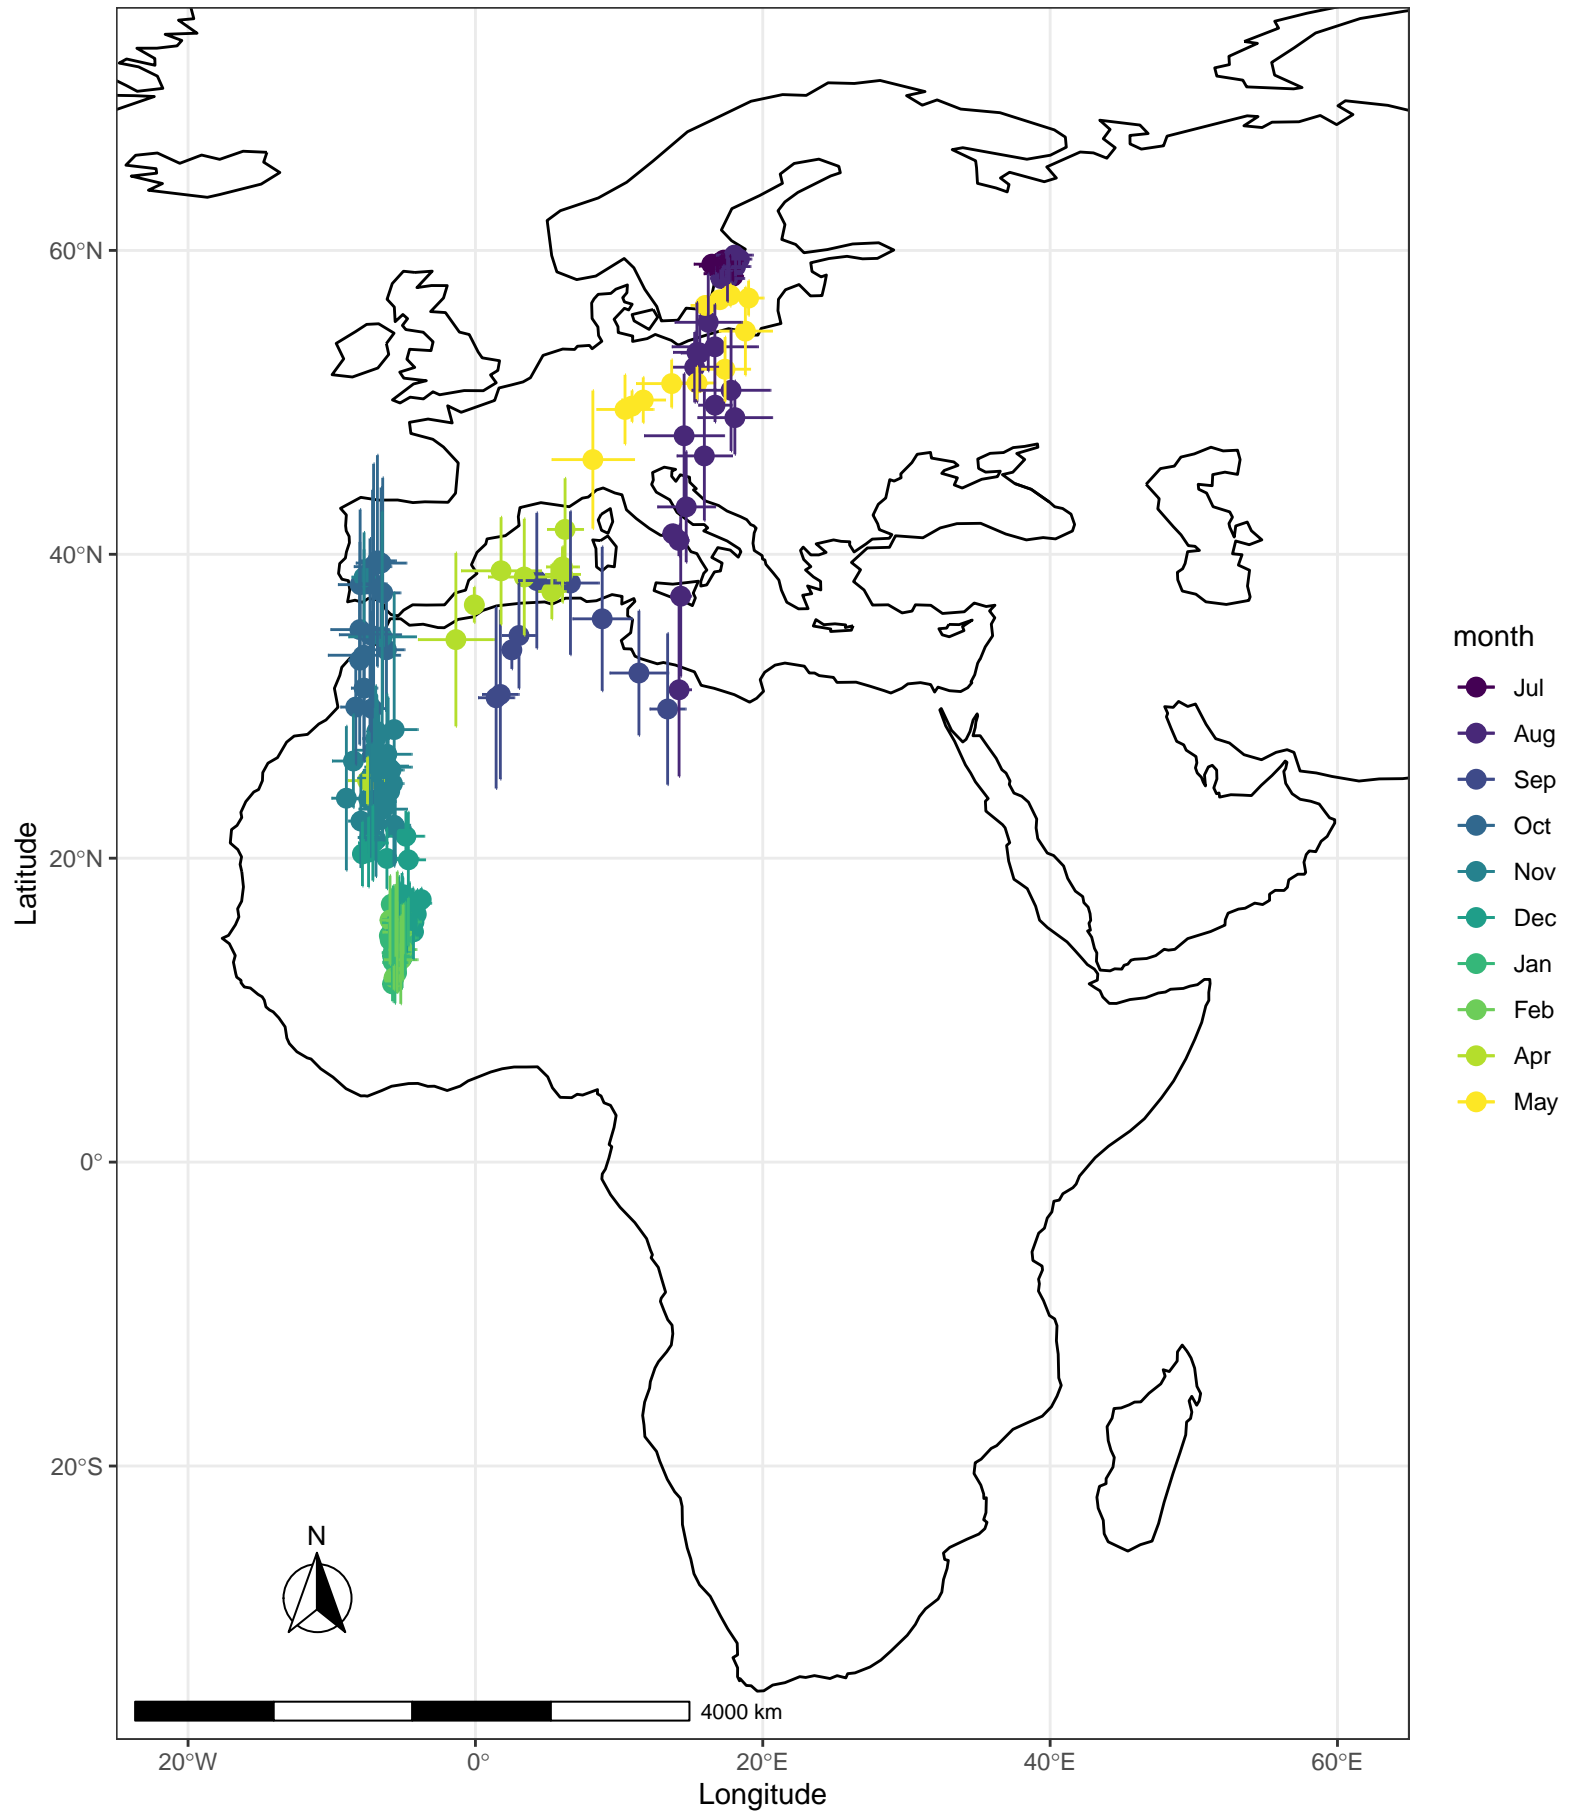

BM245

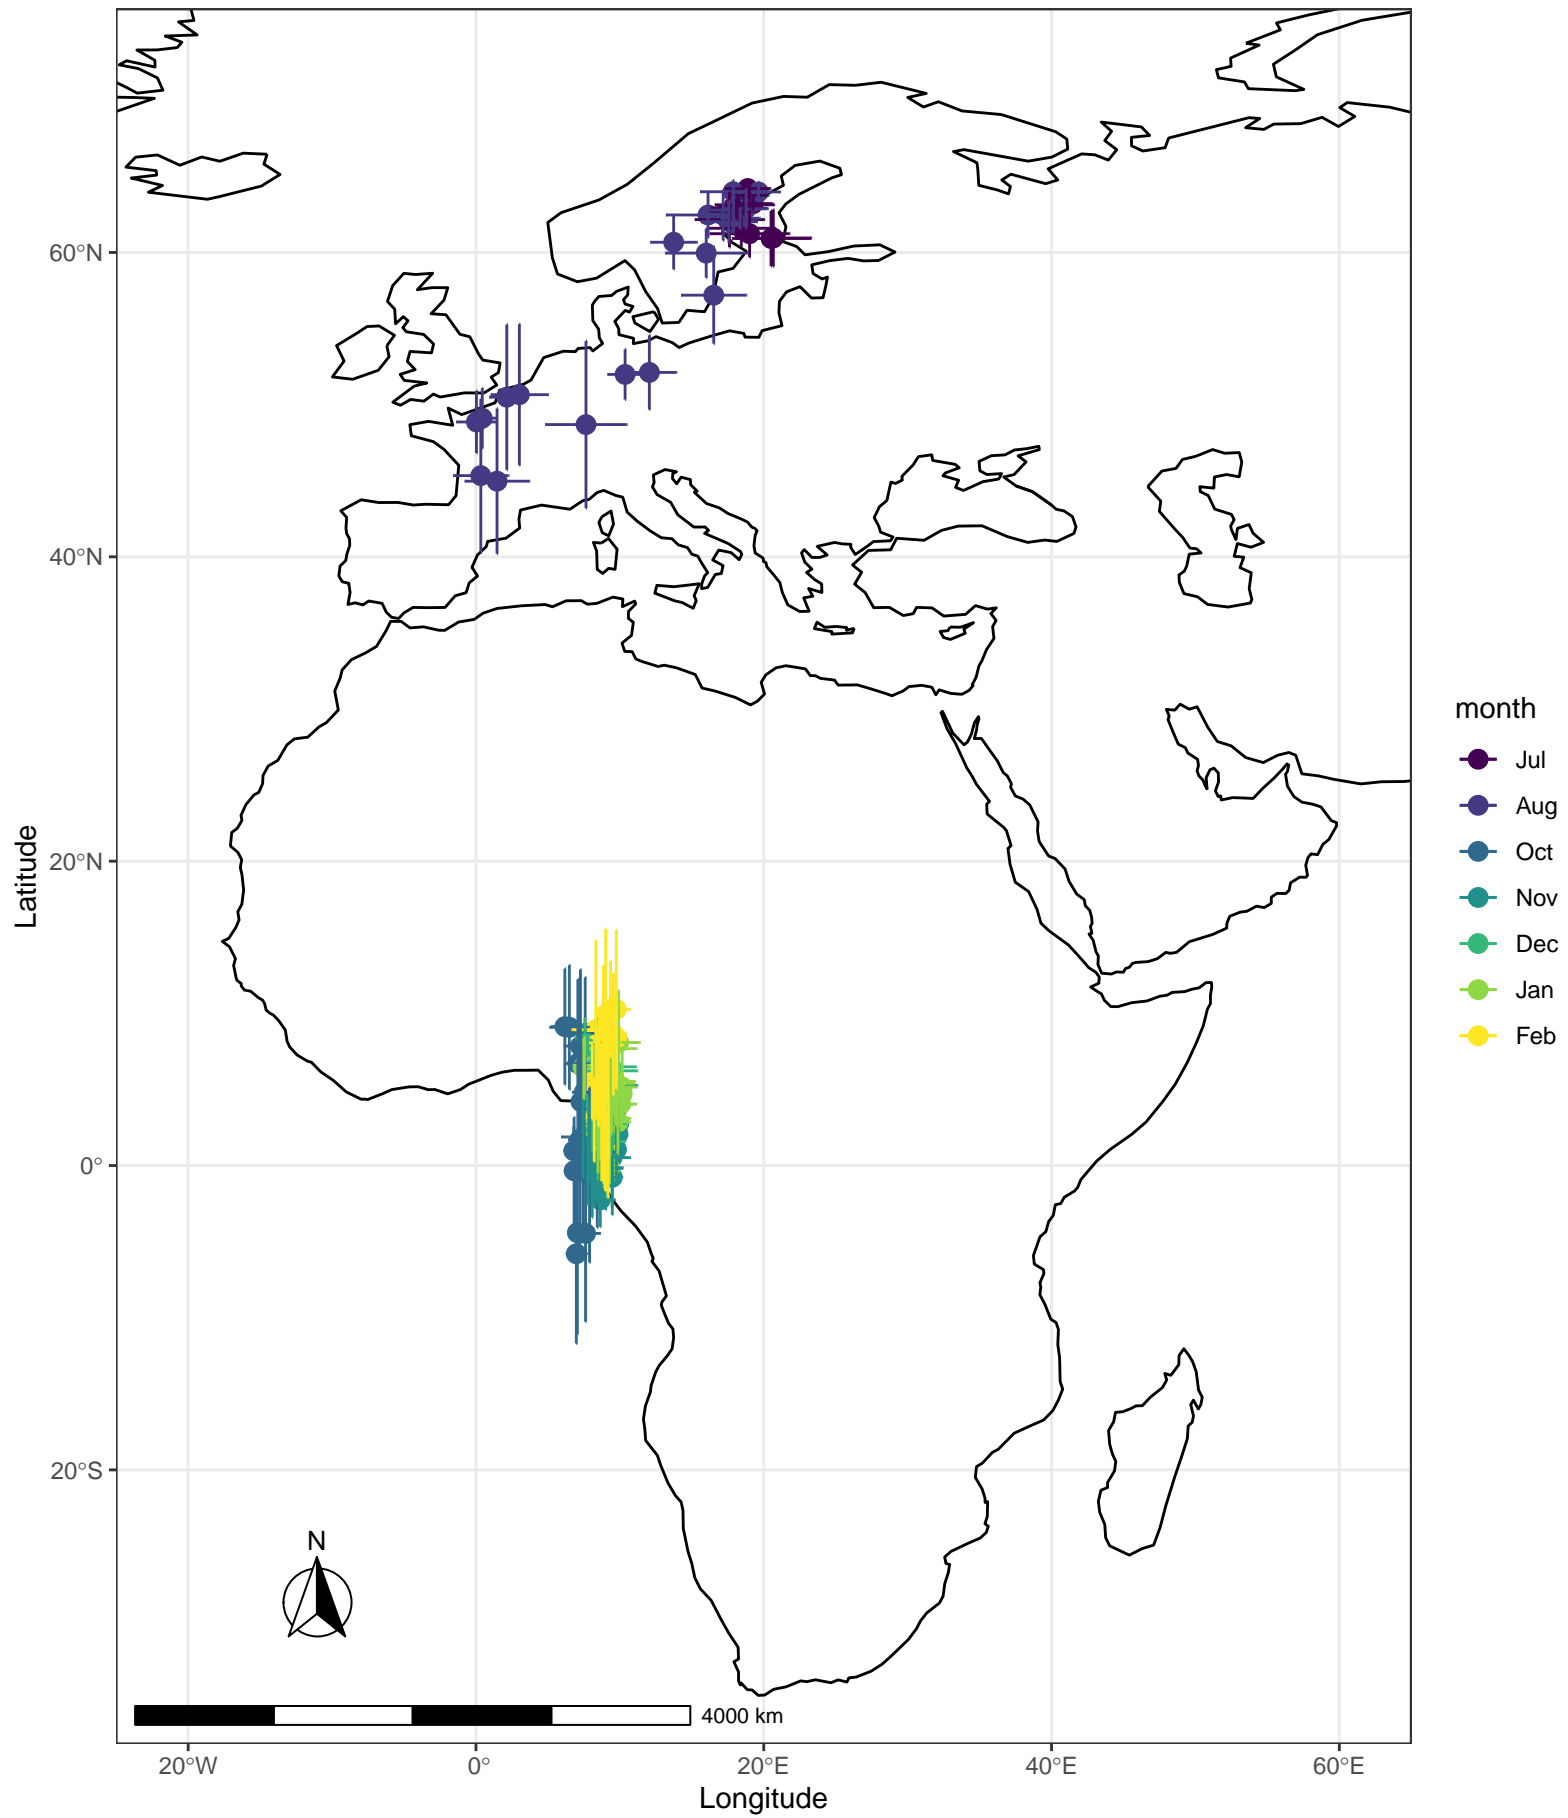



BM241

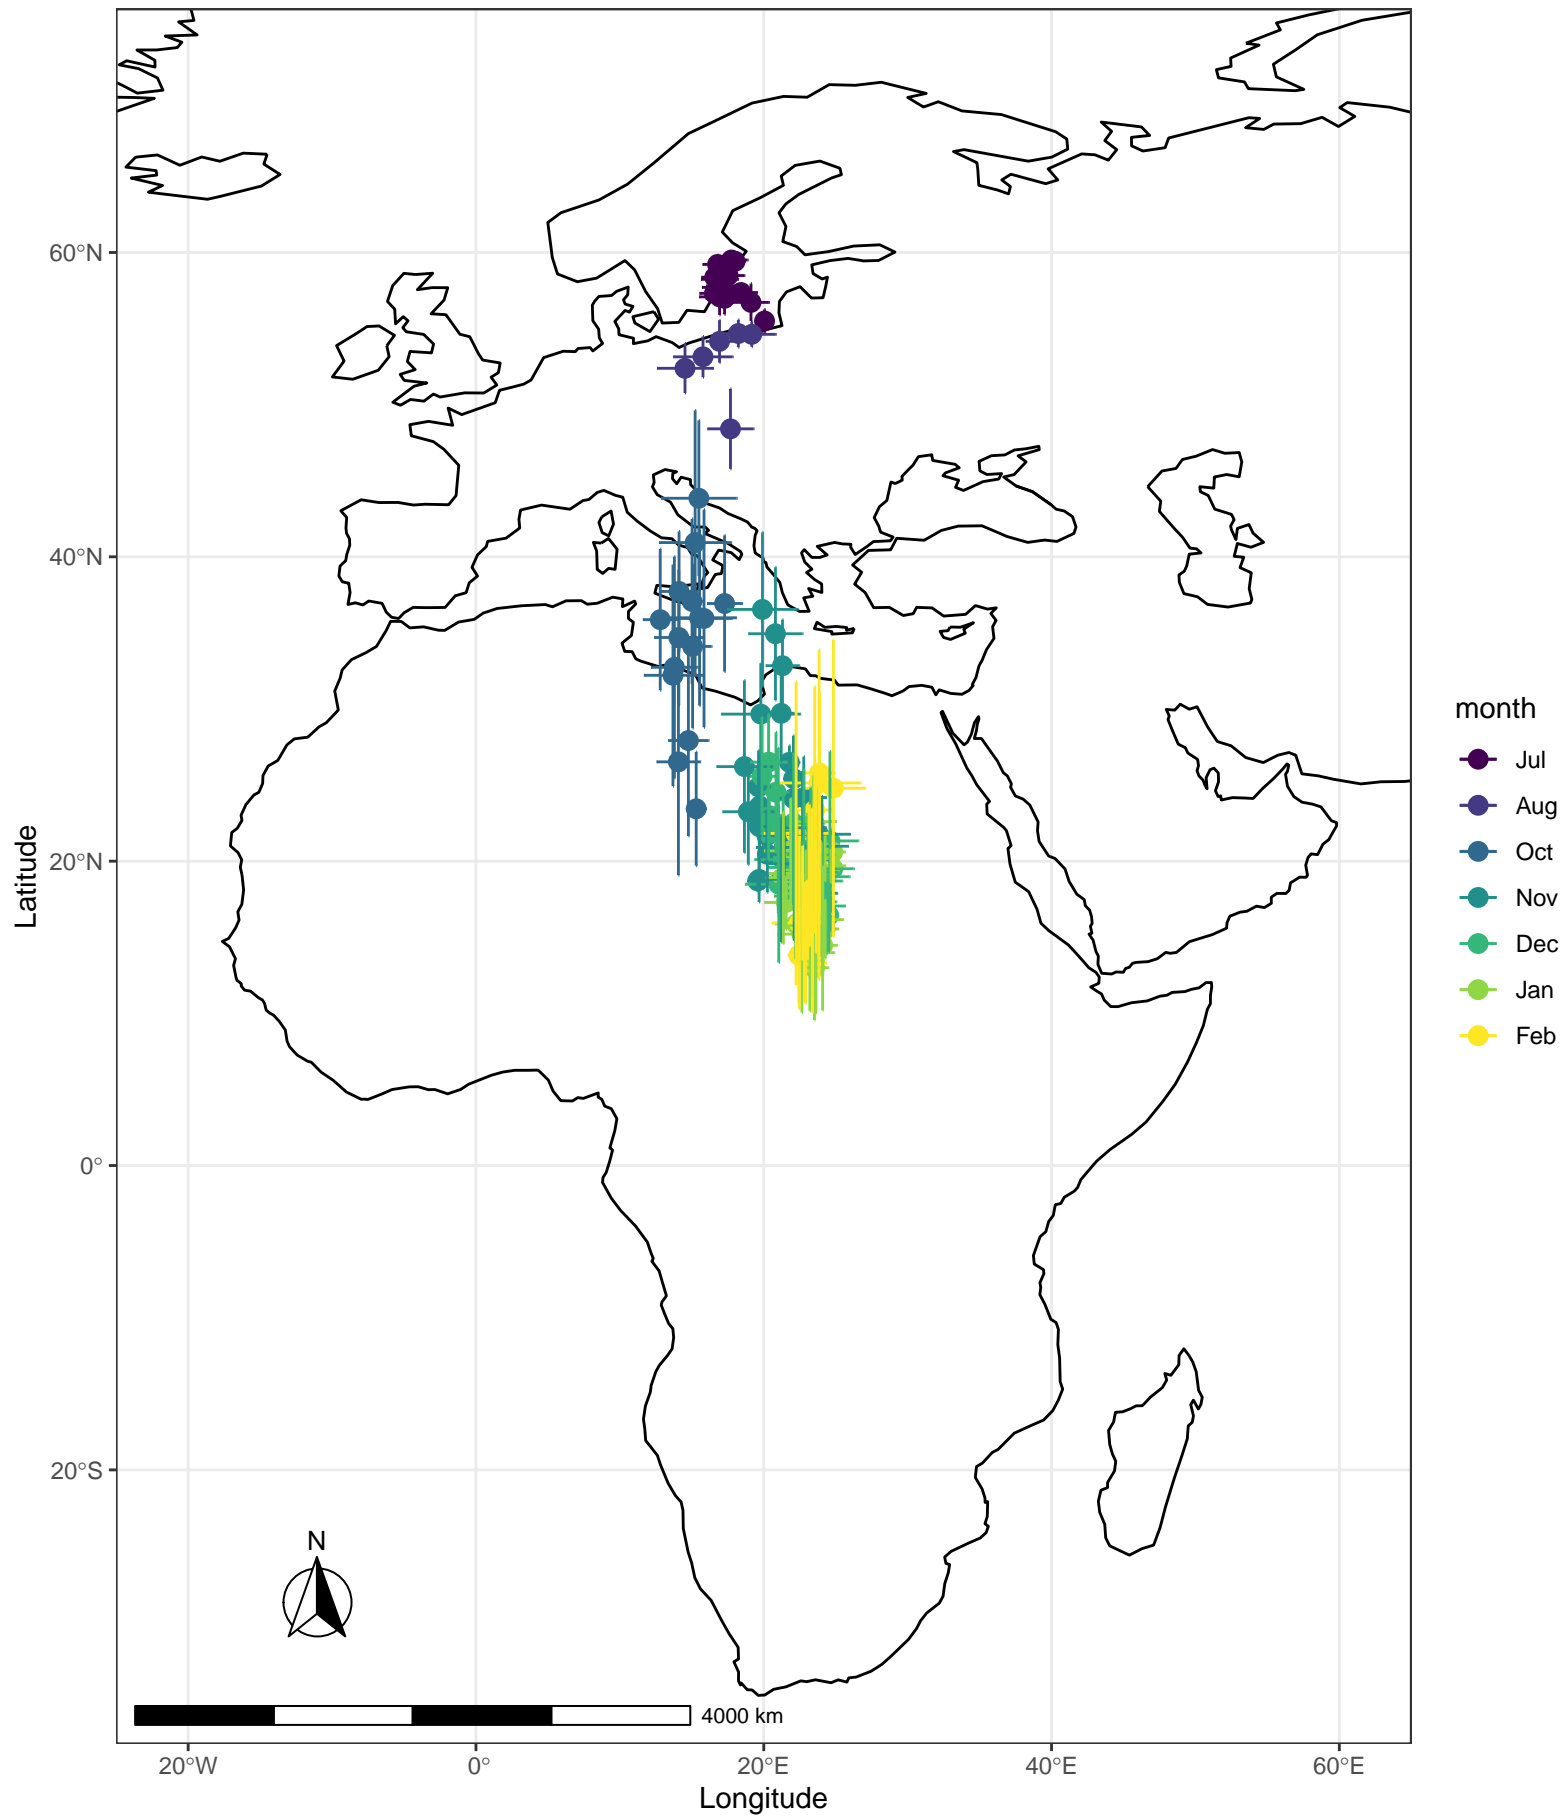

Supplement: 41467_2023_35788_MOESM5_ESM.pdf [file 41467_2023_35788_MOESM5_ESM.pdf]
